# Supplementary material for: Transcriptional Profiling of Resistant and Susceptible Cultivars of Grapevine (Vitis L.) Reveals Hypersensitive Responses to Plasmopara viticola
Source: Front Microbiol. 2022 Apr 25;13:846504. doi: 10.3389/fmicb.2022.846504 (PMC9097084; doi:10.3389/fmicb.2022.846504)
Supplement: Supplementary file 1 [file Data_Sheet_1.xlsx]

## Sheet: Table S1
Supplementary Table S1. The quality of RNA-seq and mapping results
Cultivar	Time	The biological replicates	Raw reads	Clean reads	Clean bases (G)	Error (%)	Q20 (%)	Q30 (%)	GC (%)	Mapped Reads (%)	Uniquely Mapped (%)
Kober 5BB	0h	1	46350162	44952028	6.74	0.02	98.28	94.79	46.31	89.54	87.25
		2	46970590	45448500	6.82	0.03	97.98	94.06	46.58	88.4	86.04
		3	46856000	45502246	6.83	0.02	98.17	94.55	46.59	89.59	87.21
	24h	1	47134280	45656504	6.85	0.02	98.26	94.79	45.44	88.97	86.61
		2	47150840	45863200	6.88	0.02	98.3	94.84	45.57	89.26	86.83
		3	44593602	43123848	6.47	0.03	98	94.17	45.55	88.45	86.01
	72h	1	45010580	43938318	6.59	0.02	98.33	94.86	45.39	88.16	86.17
		2	43019588	42177854	6.33	0.02	98.34	94.85	45.56	88.47	86.27
		3	42341998	41480958	6.22	0.02	98.47	95.1	45.46	87.03	84.89
Zitian Seedless	0h	1	45416608	43643958	6.55	0.02	98.34	94.92	45.72	94.09	91.25
		2	47760820	46344822	6.95	0.02	98.17	94.42	45.97	94.08	91.48
		3	47686966	46046796	6.91	0.02	98.07	94.25	46.33	94.23	91.64
	24h	1	44138378	42502990	6.38	0.02	98.31	94.85	45.81	94.39	91.88
		2	54031766	51315800	7.7	0.02	98.32	94.87	46.06	94.23	91.51
		3	47838136	46368150	6.96	0.03	98	94.05	46.28	94.43	91.65
	72h	1	43884592	42814516	6.42	0.02	98.59	95.41	45.97	94.65	92.4
		2	42701126	41723828	6.26	0.02	98.44	95.07	45.92	94.07	91.68
		3	43238550	42195926	6.33	0.02	98.54	95.32	45.84	94.33	92.07
		Total	826124582	801100242	120.19

## Sheet: Table S2
Supplementary Table S2. Gene expression information
Samples	FPKM<0.3	0.3≦FPKM<1	1≦FPKM<10	10≦FPKM<100	100≦FPKM
R0h-1	11819	2827	8164	8047	1390
R0h-2	11573	2753	8510	7947	1464
R0h-3	11557	2753	8551	7948	1438
R24h-1	12056	2725	7975	8113	1378
R24h-2	12226	2771	7828	7910	1512
R24h-3	11430	2962	8347	8077	1431
R72h-1	11715	2811	8291	8434	996
R72H-2	11569	2808	8329	8523	1018
R72H-3	11409	2808	8449	8575	1006
S0h-1	12304	2819	8128	7358	1638
S0h-2	12090	2875	8309	7239	1734
S0h-3	12412	2815	7914	7364	1742
S24h-1	12199	2708	7838	8284	1218
S24h-2	12004	2737	8130	8001	1375
S24h-3	12334	2672	7841	8004	1396
S72h-1	12090	2762	7955	8151	1289
S72H-2	11719	2726	8319	8178	1305
S72H-3	11769	2792	8307	8021	1358

## Sheet: Table S3
Supplementary Table S3. FPKM values of all genes
Gene_id	Kober 5BB									Zitian Seedless
	R0h-1	R0h-2	R0h-3	R24h-1	R24h-2	R24h-3	R72h-1	R72h-2	R72h-3	S0h-1	S0h-2	S0h-3	S24h-1	S24h-2	S24h-3	S72h-1	S72h-2	S72h-3
VIT_19s0014g02740	25884	30807.5	33545.6	71367.2	85068.6	71350.6	51171	59560.6	41916.2	4834.93	11719.4	16761.5	13026.3	15844	12203.8	21141.5	15559.7	13144.9
VIT_05s0077g01580	4211.19	4570.25	4168.33	19057.8	19173.8	15634.4	7075.26	8824.14	9310.75	4313.63	4479.78	4542.48	6455.42	9370.59	14999.8	1586.48	3780.65	2351
VIT_07s0005g00660	6474.08	7200.32	6870.9	7115.56	8804.22	8222.82	3066.86	3374.11	3503.5	7227.24	12640.1	15203.4	3915.18	6832.48	6828.06	7244.41	6918.15	7017.52
VIT_17s0000g03690	17102.2	15511.7	15630.8	2661.01	2795.33	3996.42	4927.89	4717.06	4362.45	1547.38	1718.39	1137.97	4024.12	3636.18	2250.44	10983.9	7746.42	3817.36
VIT_06s0004g04660	823.744	1232.58	986.415	3219.35	3469.44	3014.42	2116.87	2622.48	3289.66	1940.06	3180.23	7290.04	3945.3	5851.86	6888.15	1283.28	3060.96	3787.51
VIT_03s0038g01510	2563.12	2777.01	2163.1	6595.79	6580.5	6092.19	5147.95	4225.38	6452.44	781.223	2214.27	5431.64	547.138	1695.83	1298.23	689.727	594.832	1309.67
VIT_17s0000g02480	2371.54	2335.19	2201.89	2134.51	2870.52	2176.33	711.454	715.314	669.861	3916.93	5399.63	5527.23	2427.01	3188.66	2859.54	4785.08	4855.17	3427.59
VIT_18s0001g00360	891.329	826.862	982.703	2108.3	2893.46	2668.42	303.073	257.958	285.87	5455.87	5676.19	8629.03	3085.32	3558.59	2907.06	3399.52	3820.49	4472.06
VIT_18s0072g00380	2270.26	3338.65	3143.33	1659.14	1804.1	1667.06	1113.6	1256.66	1403.76	1387.71	2163.36	5434.92	3482.36	3860.02	2853.77	1903.3	3393.38	4336.36
VIT_19s0027g00200	6353.91	7489.75	8325.36	1113.98	1211.18	2429.49	1623.91	1384.9	1285.72	811.474	967.432	2012.69	1569.51	1715.16	1249.29	2416.24	1809.73	1465.98
VIT_02s0025g01320	1706.65	1715.57	1737.38	1721.36	2224.69	2029.12	630.251	818.673	809.028	5101.18	5638.33	7162.61	1649.27	2166.48	2268.65	2139.82	2147.69	2896.76
VIT_05s0020g01170	2180.52	3155.04	2540.77	2782.34	2952.61	2996.65	1626.39	1722.05	1932.05	1432.76	3053.81	4080	1658.03	3140.62	2661.28	1693.68	1820.54	1653.64
VIT_02s0025g01720	2438.51	1791.69	1839.12	2103.48	2864.87	2488.77	1102.81	1159.45	1082.96	2762.7	2364.57	2463.38	1989.96	2075.69	2022.94	4266.67	3898.39	3561.46
VIT_06s0004g05180	5219.67	3664.67	4027.75	941.914	973.536	1189.41	4376.65	3587.61	3407.12	417.308	372.113	360.318	817.478	479.868	256.356	5484.6	3862.49	2541.38
VIT_16s0050g01240	2528.41	2789	3302.58	1906.42	2485.61	2969.43	2148.55	2499.3	2048.27	1863.37	2101.78	3460.32	818.402	1508.31	1755.28	1923.78	1670.03	2161.06
VIT_08s0040g00470	1834	1880.34	1974.19	1826.49	2380.28	2040.11	560.195	557.058	549.546	4447.84	5407.18	4551.12	1395.25	2111.75	1921.41	1891.58	1957.17	2111.71
VIT_19s0090g01340	4235.5	7912.85	8481.07	1471.98	1325.3	3641.11	1805.14	1129.42	2114.42	242.311	139.896	961.175	505.655	791.005	1174.46	458.469	431.179	829.372
VIT_09s0070g00160	2047.97	2018.26	2095.73	1861.27	2305.4	2116.44	457.068	506.558	478.965	2939.17	4839.77	4838.37	1307.84	2020.87	1984.94	2036.69	1546.77	2015.79
VIT_01s0127g00470	2751.51	1877.93	2280.43	278.652	213.272	470.397	1278.12	919.233	803.455	243.015	385.395	6346.96	1935.59	1715.72	1554.15	3850.66	2371.83	6306.37
VIT_18s0001g14400	1591.41	2161.73	1768.39	2449.8	2807.17	2304.93	1570.18	1695.33	1636.01	994.375	1629.95	1803.46	2506.32	3963.86	4226.09	534.241	885.162	619.883
VIT_13s0019g01430	699.583	576.416	559.016	3132.5	4179.76	2846.4	699.517	751.748	597.747	4069.17	3040.22	1941.58	1171.6	1295.8	1170.75	2195.41	2576.93	2824.07
VIT_11s0037g01130	2266.47	1980.25	2087.74	473.733	574.131	745.847	894.798	957.208	903.427	1712.09	2326.2	3584.05	1759	2077.04	2061.18	2931.22	2519.36	2555.24
VIT_14s0068g01490	1028.95	1177.96	1386.87	440.157	597.403	696.545	429.898	620.247	572.479	1514.32	2359.06	5909.77	1158.81	2024.27	2269.61	2496.47	2052.85	3314.74
VIT_11s0016g00710	1559.67	1355.76	1418.42	694.958	846.438	833.987	268.686	372.449	322.724	2662.03	3645.86	3640.82	1054.96	1584.71	1687.2	2590.37	2372.76	2569.61
VIT_18s0001g07320	2253.5	2109.28	2157.62	450.256	485.968	692.441	597.453	643.935	561.07	1272.82	1833.56	3422.99	1264.55	1672.54	1564.44	3248.22	2377.76	2729.59
VIT_19s0014g02730	888.246	881.668	618.235	1704.45	2349.47	1836.64	3256.6	2778.67	985.318	317.983	1292.83	1963.84	1572.28	1826.34	1221.54	2459.19	1590.93	1358.88
VIT_12s0028g03270	1703.52	1627.69	1652.23	213.516	242.519	402.023	1554.68	1628.61	1440.05	1023.78	1941.87	2353.66	803.708	1572.45	1954.72	3123.6	2461.3	2811.5
VIT_11s0052g00100	1703.23	1563.96	1735.28	670.341	806.263	993.79	362.647	480.249	421.645	2548.47	3351.95	3850.88	553.73	928.503	1092.55	2355.22	2132.54	2584.51
VIT_05s0020g02270	1568.32	1518.36	1459.2	911.547	1164.09	1179.34	1345.7	1264.13	1241.48	2126.48	2661.4	2358.31	974.726	1388.59	1300.44	1930.88	1770.34	1558.43
VIT_07s0031g02610	893.192	659.927	789.127	1271.99	1343.86	1263.37	487.059	689.47	760.106	2375.61	2629.08	2991.14	1209.18	1479.12	1601.7	2865.59	2082.16	2255.47
VIT_12s0134g00240	1911.7	1992.93	2017.19	177.303	261.004	426.541	454.609	446.304	427.523	1487.86	2801.06	4104.29	1155.99	1774.01	1927.13	2678.64	1793.32	1761.03
VIT_18s0001g06150	3415.76	2643.83	2874.33	149.079	169.979	578.192	440.715	425.804	464.912	1815.91	2839.41	2582.71	1365.79	1488.01	1797.4	1944.8	1553.5	944.014
VIT_15s0046g02110	945.372	885.639	851.231	1427.85	2392.95	1527.23	210.407	217.23	203.268	2190.07	3228.87	2324.97	1109.18	1578.55	1181.29	2409.96	3081.54	1413.12
VIT_16s0050g01250	2359.77	2545.32	2824.25	298.283	359.491	842.782	736.607	810.877	844.522	1239.03	1580.83	2878.12	849.641	1365.07	1371.09	2038.72	1424.87	2009.57
VIT_19s0177g00040	1586.96	1295.51	1386.38	1580.74	1782.14	1512.25	1515.65	1490.75	1408.93	1922.23	1564.55	858.038	992.937	1119.42	980.445	1672.5	1331.97	1425.88
VIT_18s0001g14270	1880.81	1773.6	1533.97	2863.94	3223.07	2457.19	1479.05	1350.88	1577.55	353.015	1125.13	164.686	824.273	1234.24	2321.38	166.934	148.259	84.1041
VIT_03s0063g02610	737.671	869.606	748.912	1570.15	1976.68	1458.66	641.672	677.104	501.558	1254.16	2363.15	1420.67	2128.78	3669.54	3167.05	417.572	531.926	305.093
VIT_09s0018g00240	477.414	547.211	618.426	2006.12	2640.06	2055.98	61.4793	104.742	128.278	3105.21	3162.64	3131.34	692.193	994.493	958.714	1004.96	1048.34	907.31
VIT_19s0177g00100	1508.65	1667.25	1751.33	1957.3	2063.55	1855.27	718.379	710.958	783.081	913.439	1561.41	1683.78	1078.68	1346.27	1267.52	856.061	953.247	964.832
VIT_13s0064g01220	1414.21	1313.07	1310.51	878.744	1210.03	1063.18	657.152	674.727	669.81	1805.24	2307.26	2464.71	811.757	1208.45	1189.06	1662.21	1355.5	1459.59
VIT_19s0177g00070	402.796	362.453	362.559	1553.8	1869.37	1570.48	801.056	889.436	802.252	3140.65	2479.56	1322.8	928.682	1256.6	1276.96	1263.56	1019.44	1578.22
VIT_02s0234g00130	764.713	652.388	746.187	1080.86	1294.63	1107.61	302.095	519.073	519.921	1675.39	2110.29	2911.39	783.282	1036.25	1205.73	1938.45	1100.36	2273.98
VIT_11s0016g01810	1859.8	1287.95	1325.19	132.944	204.576	355.375	804.798	825.621	746.299	814.367	1242.8	2575.32	932.034	1139.82	1318.32	2451.93	1411.59	2341.02
VIT_12s0035g00270	3000.65	3200.77	2830.46	520.472	585.495	653.061	1655.71	1402.97	1292.11	117.83	275.168	474.096	565.681	466.45	329.235	1681.76	1203.37	769.441
VIT_03s0038g00670	2816.66	2131.35	2491.29	594.679	654.475	732.072	1623.61	1490.94	1264.29	87.1302	105.684	118.189	358.231	261.238	157.074	2996.21	1939.23	1161.53
VIT_13s0067g01070	1455.04	1003.42	1117.95	151.107	177.244	343.843	1105.87	1095.13	1060.83	1022.15	1077.14	1870.7	848.127	943.374	1119.25	2611.24	1482.94	2422.29
VIT_05s0020g00670	799.737	981.961	922.313	1483.01	1871.62	1387.74	203.633	227.29	214.793	3279.92	2954.66	1426.88	751.046	742	723.18	784.549	1098.72	787.411
VIT_04s0008g05760	871.425	776.853	921.742	541.28	586.923	639.506	522.196	678.534	659.401	2050.97	1942.17	2242.27	717.815	1048.45	1189.8	1505.38	1435.49	1670.51
VIT_18s0001g07090	1005	988.792	976.074	335.174	432.332	495.703	72.317	104.562	89.4332	2015.68	3278.12	2388.06	636.247	926.234	883.884	1989.54	1789.63	1175.36
VIT_12s0028g03010	595.901	563.264	616.062	227.508	256.954	293.5	284.565	384.381	433.482	1374.29	3304.14	3037.06	924.731	1497.39	1532.62	1689.09	1303.02	1025.79
VIT_06s0080g01090	1079.51	946.524	1075.11	237.502	313.121	371.651	1016.94	1086.2	1098.93	608.373	864.75	1946.85	804.116	1035.27	1264.33	2318.86	1239.37	2018.65
VIT_08s0058g01230	3055.04	4076.54	3053.6	171.225	195.718	469.22	113.082	190.131	227.772	290.413	485.321	1355.6	971.344	1081.03	1107.65	358.439	991.659	911.339
ENSRNA049469936	1093.7	1095.97	1088.84	1044.59	651.861	1075.68	717.71	992.951	1220.85	1039.69	1299.63	1399.99	772.3	1035.44	1142.37	1035.79	1165.5	1182.39
VIT_18s0001g00760	3613.91	3371.13	3419.58	286.099	307.406	600.818	583.941	552.967	518.235	169.273	198.618	173.914	885.032	789.015	508.877	1266.65	834.921	454.99
VIT_01s0011g00830	982.116	989.489	946.298	806.691	1040.06	909.748	593.128	630.948	634.396	693.518	1069.8	1549.39	760.61	930.396	896.879	1647.29	1639.17	1374.41
VIT_13s0067g00260	1012.11	697.752	819.582	288.622	388.235	451.268	993.874	1035.17	1017.01	1546.75	1612.9	1801.17	712.228	932.444	999	1479.13	957.416	1105.35
VIT_13s0073g00560	903.467	908.727	922.787	1636.34	1804	1506	875.576	858.868	832.581	785.294	841.136	1103.99	653.639	750.08	710.593	747.978	992.824	961.683
VIT_04s0023g01710	956.519	757.959	739.941	1341.72	1545.05	1202.4	1092.69	1078.89	1093.94	650.088	970.338	550.644	735.424	775.552	479.942	1396.94	926.811	1035.52
VIT_00s0615g00030	577.218	387.824	475.396	1161.23	1705.13	1230.09	208.711	209.957	199.853	2379.09	2267.69	914.604	542.957	651.138	541.33	1705.15	1272.45	592.475
VIT_18s0001g09230	658.282	548.895	650.428	190.628	208.886	267.875	891.272	1015.71	1015.33	1120.56	1407.14	2074.58	560.119	747.629	979.399	1983.94	993.798	1707.46
VIT_07s0141g00570	3263.65	3602.47	3572.34	224.248	232.846	589.859	468.62	412.187	393.391	52.0393	76.5703	168.27	640.907	605.414	373.359	778.932	593.892	384.586
VIT_08s0007g02360	798.121	751.359	810.746	278.366	280.915	389.978	381.367	430.595	578.826	924.436	1056.46	3068.37	462.834	685.897	773.256	1271.95	941.375	2309
VIT_02s0087g00400	2209.29	2046.67	2178.8	1247.01	961.381	1243.3	632.39	971.266	670.318	149.536	143.897	104.309	936.74	1004.13	890.049	232.263	406.819	119.419
VIT_17s0000g10430	894.33	867.978	919.553	677.544	723.654	657.42	707.751	705.206	696.707	948.985	1038.03	1126.99	1070.57	1029.57	1257.25	895.448	958.759	955.757
VIT_06s0004g08260	862.929	906.267	955.336	866.632	1050.67	944.19	366.527	387.186	361.299	1468.89	1807.3	1420.42	596.932	849.636	946.219	686.603	705.164	569.346
VIT_19s0090g00420	480.695	504.392	531.038	2672.22	4118.56	3153.16	127.69	125.131	104.643	456.692	781.403	499.73	256.338	412.366	323.869	503.039	348.191	321.86
VIT_03s0063g00460	796.773	595.423	857.158	47.1516	71.4806	190.975	361.112	513.575	563.331	495.588	733.871	2083.57	763.3	1186.43	1524.47	1939.6	1254.06	1699.54
VIT_01s0011g05470	832.734	699.731	720.517	224.985	255.049	292.999	674.698	735.1	692.84	262.639	398.61	1457.95	777.334	929.935	959.796	2224.86	1637.78	1821.98
VIT_08s0007g05880	409.776	484.757	441.961	1089.66	1395.6	1054.33	146.316	159.153	152.831	2085.67	2586.29	1468.76	543.319	732.723	605.612	652.652	671.381	747.618
VIT_04s0044g01410	3265.85	2998.32	3724.34	372.102	335.844	776.097	569.809	510.842	488.028	53.6881	58.75	59.0826	405.118	400.285	231.1	475.546	345.383	237.997
VIT_05s0077g00810	1227.61	1253.57	1235.68	506.868	693.634	749.982	96.9393	145.638	137.846	1244.36	2090.67	1642.67	451.945	700.681	657.579	1050.26	773.196	554.343
VIT_09s0002g01080	694.015	514.658	581.885	166.521	229.9	276.978	261.45	353.699	328.108	1781.93	1335.89	1636.81	662.951	701.268	695.928	1883.02	1413.15	1509.91
VIT_00s0207g00210	2721.9	2248.68	2428.68	336.159	312.066	562.929	981.766	819.664	775.482	66.4672	65.0215	204.826	773.854	630.518	508.774	587.92	433.017	368.995
VIT_04s0008g03930	2195.02	1642.59	1364.12	703.338	869.781	880.615	778.685	947.939	835.927	162.04	174.583	573.926	729.742	700.09	704.362	351.391	473.014	631.241
VIT_12s0028g01080	2440.93	2015.63	2288.39	253.18	242.739	491.444	742.808	663.659	667.748	184.681	190.145	282.724	698.355	592.715	437.979	1067.52	805.74	613.116
VIT_06s0004g03240	775.267	813.275	737.503	573.389	601.644	563.042	639.557	624.372	615.406	987.998	1131.76	1114.81	1188.51	1153.5	1191.65	656.384	727.954	560.43
VIT_03s0038g00760	556.03	479.141	450.625	374.918	477.532	410.553	320.299	355.943	384.458	928.527	1199.65	2342.97	594.771	842.232	922.472	1222.19	804.186	1812.35
VIT_10s0116g01200	542.741	416.934	457.096	237.491	295.765	314.182	184.887	265.804	283.654	1729.12	1662.49	1993.85	580.732	700.685	743.663	1515.7	1028.1	1477.4
VIT_00s0199g00310	678.217	630.312	650.871	412.777	484.689	522.585	271.123	338.006	392.45	817.409	1259.08	1637.93	354.488	435.137	509.224	1637.96	1537.49	1769.77
VIT_12s0057g00630	3571.71	2937.84	3372.25	207.144	193.795	547.949	190.102	156.544	149.194	8.11118	13.5714	19.2308	643.909	583.567	265.045	712.26	481.561	254.394
VIT_15s0046g03180	480.594	470.375	524.169	1886.46	2671.25	1918.11	93.8279	88.6713	103.199	1043.92	846.466	575.967	625.881	665.041	430.063	579.032	897.024	398.975
VIT_02s0025g03390	859.839	864.974	896.5	599.377	575.798	476.495	1421.81	1486.01	1476.2	129.184	248.439	688.026	594.777	589.794	696.315	949.061	868.073	841.797
VIT_08s0056g01600	638.123	781.693	847.485	2163.32	3405.74	2613.5	197.012	166.715	152.225	471.431	607.646	401.907	431.637	529.077	340.495	123.533	205.371	88.2218
VIT_14s0036g01020	628.625	563.52	602.843	352.44	461.697	465.839	342.236	375.129	303.912	1394.59	1185.79	1167.24	571.177	776.154	700.938	1495.07	1339.93	1403.44
VIT_09s0002g04320	2811.52	3208.95	3565.44	117.583	116.973	510.093	210.945	199.597	174.523	117.338	131.843	132.95	530.89	484.124	287.227	629.7	473.467	248.596
VIT_01s0010g03640	361.82	443.629	444.653	538.506	863.423	652.007	108.694	110.242	88.8964	1429.25	3042.54	2461.47	438.745	655.607	639.539	554.687	527.301	518.627
VIT_19s0090g01000	813.408	735.006	683.627	440.336	417.535	390.218	1004.1	978.452	904.845	463.765	603.243	697.549	517.125	391.463	359.206	2018.99	1244.35	1204.83
VIT_09s0002g04520	912.898	1359.85	1097.71	567.047	641.952	675.076	449.197	454.119	430.826	436.527	1122.35	1470.28	632.394	1038.12	1053.34	457.365	517.388	487.195
VIT_13s0156g00150	790.818	898.974	856.026	223.827	293.829	346.026	365.296	428.318	483.82	805.781	1194.53	1786.97	253.141	562.534	608.219	1238.46	1157.84	1312.15
VIT_03s0091g00690	693.164	512.569	693.602	79.7991	112.207	179.68	409.084	529.643	676.523	412.514	648.298	1676.76	584.656	856.996	1019.57	1754.07	868.362	1608.74
VIT_14s0030g01230	762.508	1184.98	719.89	197.368	263.081	247.699	325.223	288.655	312.31	358.376	1176.79	2163.65	620.031	1150.58	1746.25	326.616	438.333	1028.74
VIT_06s0009g02230	404.996	542.017	491.78	750.317	723.078	766.136	285.802	281.894	301.778	949.23	1474.42	2019.98	667.227	967.843	925.255	556.983	514.186	666.303
VIT_11s0016g05530	117.372	228.204	178.678	445.958	480.643	463.159	66.667	132.014	153.042	1668.74	1328.81	2819.67	595.37	830.296	924.219	413.452	655.539	1466.89
VIT_15s0048g02410	1120.81	864.923	883.703	506.78	567.367	547.791	1051.18	927.828	915.384	168.993	221.905	212.498	124.395	89.3661	54.7817	1908.97	1420.52	1331.42
VIT_05s0094g00360	185.824	271.853	250.366	185.176	301.78	274.007	14.5714	31.4205	23.335	2467.14	2383.55	3034.97	393.877	521.741	528.581	640.553	680.65	723.087
VIT_02s0025g01050	774.748	857.532	797.33	934.015	870.03	888.35	832.292	792.459	912.541	472.14	709.694	878.883	454.457	637.92	589.732	450.526	519.079	487.877
VIT_05s0049g01760	827.599	820.368	789.002	417.303	550.364	536.249	357.712	344.673	264.769	1639.4	2657.01	959.617	204.645	227.044	241.635	705.048	660.149	637.617
VIT_06s0004g07870	782.958	787.428	863.832	504.607	540.882	598.532	364.751	378.84	379.835	1210.06	1499.47	1282.21	393.052	547.362	623.924	812.439	533.871	716.32
VIT_09s0002g05180	809.128	1371.28	1181.63	841.264	691.091	662.836	892.973	908.207	1023.85	209.325	310.897	497.892	671.819	914.213	898.837	293.549	355.206	263.585
VIT_08s0007g03530	712.466	664.496	680.059	255.286	295.463	335.985	288.541	292.574	263.216	1010.83	1653.51	1779.54	475.349	665.062	609.929	1008.16	823.957	910.385
VIT_08s0007g05790	761.497	756.382	687.894	309.311	341.831	369.483	199.388	196.281	188.538	999.61	1892.44	1926.09	585.749	749.558	821.852	519.767	571.14	832.709
VIT_12s0055g00800	215.176	313.892	409.588	70.3051	64.3593	85.4271	19.1287	20.9869	20.4076	28.034	42.8864	15.4309	4228.13	2647.84	1899.92	1401.09	922.7	149.505
VIT_12s0034g00130	344.109	215.801	266.348	77.1471	80.0367	123.709	59.0702	91.1101	125.558	1160.84	959.51	1273.99	780.54	911.641	1103.86	1991.87	1307.87	1603
VIT_05s0077g01570	32.9438	51.3118	31.2282	809.121	936.789	722.418	325.729	447.341	294.985	1179.61	759.449	361.055	528.46	1425.42	4216.44	23.4918	197.186	86.0734
VIT_14s0128g00120	635.508	488.007	587.323	50.4239	56.8363	127.604	280.453	364.465	380.175	581.335	762.17	1354.17	623.742	833.758	989.869	1730.4	993.081	1483.39
VIT_18s0122g01320	1177.36	725.236	795.155	552.32	587.257	471.303	934.366	743.561	647.76	129.019	109.953	157.603	155.01	87.6472	60.8097	2622.79	1398.33	946.307
VIT_17s0000g04750	779.554	535.513	719.992	203.812	268.8	360.936	180.072	279.154	328.588	1158.62	1087.89	1270.73	638.817	859.081	957.436	1132.02	701.771	829.522
VIT_09s0002g00890	139.781	206.078	171.844	1098.2	1413.32	1001.29	25.1231	50.2476	37.0029	2154.54	2167.46	1347.23	288.279	413.567	486.086	273.1	436.973	579.147
VIT_04s0023g00410	2332.4	2164.63	2329.43	157.368	165.358	352.744	242.726	234.145	230.948	141.887	190.202	189.135	740.835	652.925	440.413	756.387	573.633	302.783
VIT_04s0044g00020	102.454	101.847	111.24	152.351	137.917	144.76	126.672	121.028	153.405	650.327	533.882	550.602	2622.47	2636.99	2648.06	424.075	519.537	400.803
VIT_10s0003g04350	2579.8	2965.06	3058.75	213.894	235.814	452.142	296.679	276.221	247.794	15.9687	32.6653	29.434	285.861	215.675	131.864	486.497	356.347	205.345
VIT_06s0004g04650	254.709	432.789	328.067	1189.02	1269.95	1079.17	472.666	521.349	671.478	139.234	299.31	765.013	758.117	1414.42	1826.1	79.1269	208.69	371.558
VIT_14s0066g01080	345.995	335.673	324.605	722.014	884.153	682.821	343.367	356.745	324.827	1479.1	1669.87	1125.49	448.265	588.89	682.034	550.802	591.132	597.91
VIT_08s0007g08310	298.114	241.048	198.302	757.628	782.105	603.199	1657.04	1288.61	1593.9	471.736	531.329	779.78	124.897	259.449	299.04	113.549	206.217	1577.71
VIT_03s0038g03530	719.391	536.969	561.904	197.396	261.798	280.911	133.423	193.528	163.439	913.689	900.569	1197.79	673.14	745.148	676.27	1314.5	1260.7	915.059
VIT_02s0087g00780	190.627	224.528	176.461	491.601	681.785	501.317	183.225	199.745	191.323	1437.49	1673.79	1558.16	498.684	620.544	619.875	722.818	863.915	772.788
VIT_07s0005g00030	273.955	252.635	245.953	1398.26	1954.1	1387.04	203.357	251.47	185.783	862.356	794.187	234.714	510.586	671.615	605.235	718.642	600.065	439.789
VIT_06s0009g01620	507.53	472.719	468.684	186.652	273.168	256.147	337.277	383.836	416.597	923.605	1233.42	1719.92	503.093	676.403	694.104	896.365	731.004	888.339
VIT_19s0014g05430	619.92	772.178	765.38	118.772	129.585	212.796	130.828	150.327	160.378	559.078	1461.85	1956.49	349.266	633.117	648.469	906.986	892.908	942.892
VIT_17s0000g00010	430.432	280.911	349.408	248.692	302.009	354.55	148.529	158.666	177.851	1405.01	1495.7	1012.63	618.171	826.323	671.598	1213.13	944.888	745.323
VIT_13s0019g04280	381.063	497.166	421.357	654.615	665.537	398.659	299.316	331.711	357.37	576.257	1208.88	622.91	595.186	563.851	735.522	1167.83	1162.45	738.148
VIT_07s0005g02110	426.291	388.625	434.595	455.699	629.368	484.474	375.13	441.38	408.997	951.112	1392.13	1246.34	352.079	511.653	480.732	842.397	676.554	846.388
VIT_19s0014g04940	651.431	473.555	536.076	461.278	642.711	562.211	139.635	170.051	165.527	1269.13	1232.21	1020.59	374.992	445.01	413.863	1159.94	712.961	824.914
VIT_10s0003g03810	294.584	400.56	386.182	110.488	160.045	186.299	17.8915	14.7036	22.2617	1324.89	1798.15	1839.64	505.982	856.032	893.626	706.202	1021.56	635.246
VIT_18s0001g02300	462.11	400.863	411.566	505.648	662.87	581.229	268.567	336.539	343.104	819.49	1127.19	808.307	449.397	572.712	607.427	1096.36	882.071	819.197
VIT_02s0025g04460	797.494	687.095	915.749	157.052	213.111	351.03	173.335	228.188	263.038	602.748	620.744	1278.95	593.482	855.631	945.811	978.053	927.735	538.932
VIT_03s0038g03430	862.81	839.595	829.291	453.389	488.421	553.399	116.325	97.0285	117.773	783.698	875.474	962.272	748.923	956.719	800.854	492.031	825.69	311.106
VIT_17s0000g02050	996.274	901.087	1182.99	49.0977	63.817	225.535	821.228	832.144	871.076	333.862	414.261	1079.92	244.397	390.802	559.314	831.151	452.472	803.852
VIT_06s0004g03550	475.083	466.374	468.944	785.271	901.538	740.945	489.416	550.059	450.236	386.371	427.659	481.11	370.275	379.927	459.199	1009.91	1039.25	1079.85
VIT_13s0019g02780	82.4835	64.1696	66.2282	3122.46	4349.94	3120.56	26.137	38.9534	14.3502	0.280659	0.360401	0.0915137	2.77305	2.9425	2.51352	19.5493	15.9772	8.97563
VIT_08s0007g00840	1054.95	693.299	786.629	323.263	313.606	343.675	638.206	520.318	508.981	316.243	317.214	639.525	467.389	376.669	291.794	1256.63	848.043	1169.59
ENSRNA049469943	662.316	759.147	594.721	629.433	426.333	678.89	394.241	507.228	703.308	626.122	626.753	704.414	402.356	615.415	609.218	587.497	679.574	652.535
VIT_08s0007g00130	114.887	107.474	91.8082	1702.93	2435.96	1704.96	133.621	159.397	101.44	950.29	655.183	221.328	200.588	232.956	173.366	558.01	731.967	544.295
VIT_08s0007g07320	338.245	382.636	349.298	713.114	698.35	596.344	364.941	390.711	402.686	693.667	867.512	775.474	907.282	1176.48	1071.75	305.121	359.885	414.261
VIT_05s0020g03180	1634.08	1490.13	1592.92	197.581	203.942	343.575	399.82	377.689	357.545	150.21	184.833	286.222	646.619	552.239	397.256	886.15	664.831	435.876
VIT_06s0004g04180	454.538	427.48	476.47	53.0571	61.0906	125.376	337.931	354.034	415.935	743.989	1460.32	1779.62	391.328	734.182	882.467	728.789	431.191	941.496
VIT_15s0024g00040	1842.52	1474.66	1425.1	232.208	237.257	350.308	577.232	507.102	442.786	22.8545	33.133	58.2567	527.394	415.163	226.72	1145.6	772.423	494.389
VIT_04s0044g00580	551.053	510.195	488.827	567.2	608.564	490.533	595.951	538.685	544.601	587.871	752.304	705.36	644.478	603.369	631.399	621.335	631.619	604.678
VIT_05s0020g04780	328.712	342.381	345.334	266.462	320.518	286.319	2.27432	6.03957	3.69088	1498.66	2122.54	2316.37	243.002	410.985	370.269	536.718	494.352	735.339
VIT_19s0093g00310	226.891	203.796	199.315	893.42	1327.08	1091.65	112.91	106.157	110.898	513.577	553.763	590.549	446.809	944.734	891.866	934.509	780.16	670.532
VIT_01s0011g02710	660.46	1389.94	1322.29	113.681	98.8562	307.496	57.7181	50.3195	60.085	1298.18	1418.36	1576.68	341.095	361.586	249.821	597.903	480.709	195.277
VIT_06s0004g03540	597.104	495.256	558.292	55.9437	55.7135	155.069	185.251	211.346	188.011	558.614	608.819	1241.68	720.593	814.451	832.27	1209.05	953.468	1116.82
VIT_01s0010g03620	2166.11	1833.31	1962.7	165.511	172.28	332.848	452.066	386.704	331.102	19.6333	27.3573	27.6114	363.505	268.719	155.22	894.338	624.152	367.503
VIT_01s0011g04550	471.06	483.794	491.909	100.774	110.931	155.201	686.909	767.787	834.317	609.15	859.975	1115.94	422.815	639.395	843.036	675.493	514.213	756.95
VIT_11s0016g02690	637.393	993.18	802.744	374.77	526.965	494.328	287.934	303.606	258.145	500.869	1028.16	1033.23	419.612	696.051	794.193	302.289	370.923	305.26
VIT_08s0058g01390	326.23	318.352	397.906	221.325	171.734	208.012	360.124	356.581	390.216	1057.76	1386.9	850.483	429.334	557.381	580.693	1050.74	790.982	650.009
VIT_06s0004g07500	501.773	373.467	415.125	169.798	194.445	245.842	256.041	292.36	281.409	1069	861.634	1145.42	470.94	499.712	513.719	998.384	716.164	1086.49
VIT_18s0001g07240	727.548	691.526	740.022	648.126	711.073	688.657	454.83	389.92	415.168	349.919	421.87	516.868	731.795	787.683	761.535	383.483	326.332	336.392
VIT_11s0016g04700	789.179	609.704	646.156	139.867	173.566	236.943	294.43	333.507	289.971	615.495	792.082	869.996	543.668	601.101	694.412	749.572	868.128	821.165
VIT_14s0060g00690	566.858	679.927	621.488	562.043	617.376	617.127	395.104	393.04	451.43	440.465	713.117	868.305	500.856	589.096	525.941	487.642	495.197	400.858
VIT_13s0074g00770	823.88	1188.46	972.135	573.092	557.289	636.956	624.275	677.346	655.886	227.143	487.245	637.551	272.944	375.717	379.93	238.374	246.27	251.413
VIT_03s0132g00070	433.228	354.444	441.12	166.049	230.536	280.415	115.23	144.782	131.451	991.182	503.03	638.02	467.724	597.237	526.143	1456.52	1493.56	829.553
VIT_02s0025g01510	569.431	443.811	459.619	400.642	445.463	439.147	271.507	264.071	262.379	675.622	862.63	777.635	407.768	544.056	424.45	892.646	782.377	852.711
VIT_01s0011g00690	457.09	438.851	415.801	571.867	812.939	610.068	98.1207	109.029	92.8248	1441.56	1231.44	773.066	344.652	327.1	279.835	601.824	707.292	429.431
VIT_13s0064g00670	1957.52	2274.96	1960.69	148.136	145.043	330.893	310.596	262.262	229.095	52.5211	113.274	145.279	349.759	344.384	213.299	406.795	305.431	179.696
VIT_17s0000g05030	536.384	503.449	585.921	569.186	773.577	619.544	176.342	222.558	197.209	1516.82	1062.98	701.865	267.709	287.873	343.744	410.113	498.381	388.206
VIT_06s0004g04510	305.476	329.448	314.229	1200.85	1510.75	1127.83	339.096	367.646	293.513	443.837	346.755	324.031	295.497	318.856	311.989	531.563	759.61	529.839
VIT_02s0025g01090	1324.02	1288.85	895.035	946.599	879.549	994.528	804.537	904.561	886.805	5.28883	15.9453	12.5965	140.411	170.04	114.128	105.604	90.5305	64.2193
VIT_06s0080g01230	422.208	323.38	316.409	694.987	856.037	698.587	197.587	210.65	164.568	616.864	617.406	387.214	341.853	362.358	360.615	1048.38	1038.67	969.144
VIT_00s0904g00010	2204.83	1909.6	1973.48	166.072	180.656	397.122	298.054	261.933	237.209	49.1008	71.1448	99.0721	451.019	459.226	277.412	210.707	177.131	144.381
VIT_19s0014g04650	1055.75	1105.25	1100.23	62.7824	67.4956	212.677	231.114	200.745	203.576	158.061	424.868	1076.2	374.478	573.228	657.292	832.407	635.611	587.895
VIT_12s0059g01380	400.46	383.755	381.601	99.2629	115.911	175.914	169.686	222.438	181.375	1520.54	1288.94	1042.16	214.905	323.522	501.916	726.591	948.524	808.333
VIT_08s0007g05580	316.142	290.79	329.808	133.686	192.455	222.41	12.566	21.2	18.3148	1534.43	1668.23	1904.98	211.167	444.124	636.158	434.998	317.764	806.558
VIT_17s0000g01970	395.748	314.898	360.425	595.853	574.351	501.443	221.926	345.043	344.37	414.709	697.408	1029.74	468.123	588.918	635.214	764.473	433.893	723.642
VIT_01s0011g03070	379.568	307.999	325.414	981.948	1230.69	863.583	469.158	470.016	506.769	776.012	948.68	496.848	310.888	339.636	267.868	309.842	227.899	192.162
VIT_01s0011g06140	157.275	134.904	154.102	238.533	371.539	323.168	113.809	167.309	239.009	1396.06	1074.63	1369.62	410.216	546.009	628.822	631.761	505.265	922.213
VIT_16s0013g01080	634.887	449.235	523.6	68.4036	58.5544	132.889	807.424	813.634	737.795	76.4965	194.555	1003.24	224.758	286.341	424.302	1140.41	514.538	1154.56
VIT_08s0040g00540	620.365	473.634	535.176	82.2175	99.168	159.625	345.83	354.137	378.094	766.349	950.291	536.681	364.863	529.661	516.805	1239.03	693.797	557.28
VIT_08s0040g01370	374.081	359.284	342.187	880.674	1066.14	844.075	166.017	190.997	179.643	789.484	847.562	389.497	460.478	564.309	515.02	453.782	377.655	344.447
VIT_18s0001g13680	512.385	548.32	562.202	308.383	361.587	356.666	262.564	318.5	289.208	624.58	870.111	1029.2	392.958	466.079	462.444	656.387	568.154	527.117
VIT_16s0100g00380	1354.57	1154.75	1011.28	656.638	771.561	706.657	147.63	143.259	129.798	110.195	270.758	186.136	376.137	604.36	482.156	322.327	474.422	195.892
VIT_18s0001g06560	530.22	479.728	545.053	21.2882	28.529	130.084	86.0113	90.9762	101.796	1166.48	1617.49	1582.83	249.824	352.479	346.371	516.963	436.901	800.738
novel.1245	665.096	1262.56	1043.66	550.335	664.03	723.163	193.362	219.508	232.165	487.915	475.865	598.445	318.297	499.047	555.766	171.82	221.316	169.398
VIT_18s0089g01170	1865.6	1437.98	1621.31	201.604	178.673	359.97	315.166	289.631	244.192	21.4236	23.7209	26.3265	420.725	344.651	214.477	699.666	499.276	276.557
VIT_05s0077g01970	488.847	415.037	457.731	22.3709	24.6526	80.3239	428.189	468.37	459.667	281.968	426.174	939.937	417.968	538.6	706.095	1194.06	560.294	1109.56
novel.132	1036.95	1684.51	1577.06	173.536	172.692	276.917	201.308	287.13	292.543	151.898	215.149	743.344	94.1337	213.105	242.012	199.58	363.536	1086.81
VIT_14s0083g00110	215.729	356.156	293.875	396.044	594.539	455.54	25.0001	30.3293	20.3506	2248.19	2293.22	764.857	141.832	244.659	285.294	165.95	206.235	205.846
VIT_14s0006g02910	421.991	449.672	445.78	279.866	323.104	318.051	394.728	424.216	381.838	609.454	819.59	867.605	336.944	530.014	482.349	691.807	532.921	619.45
VIT_02s0025g01280	312.427	260.212	338.478	28.1781	39.0853	73.0668	283.075	390.25	395.242	133.753	142.241	913.417	493.539	600.291	655.932	1584.81	933.498	1349.99
VIT_11s0016g01400	2177.78	2310.25	2141.42	102.862	99.831	287.203	187.699	160.58	155.711	7.78071	11.7023	17.6203	235.766	224.611	113.076	310.804	226.577	123.623
VIT_10s0003g02890	2104.28	1752.54	1839.69	77.0664	83.9648	265.659	242	270.146	182.998	1.08148	1.48795	0.15113	464.537	350.178	108.373	577.453	352.939	213.389
VIT_14s0068g00680	1175.23	908.105	979.918	197.171	213.009	279.631	581.789	500.997	460.71	145.639	134.229	169.959	417.932	304.597	200.33	979.347	705.551	472.771
VIT_18s0122g01190	461.297	565.345	587.222	389.048	464.271	489.231	366.196	383.225	422.297	578.519	591.997	651.773	480.048	514.26	544.104	498.291	430.172	396.136
VIT_01s0011g03420	170.266	176.24	190.638	317.897	373.086	315.796	370.911	432.638	456.69	1028.72	1258.41	1175.84	244.227	397.908	441.403	554.332	431.34	471.015
VIT_16s0050g02410	426.516	470.59	486.826	601.726	717.761	598.714	246.037	289.655	295.926	693.2	733.877	674.037	300.901	328.455	356.567	524.621	552.236	480.911
VIT_06s0004g03220	521.316	504.376	495.071	489.328	554.161	469.995	448.53	448.509	403.69	739.9	590.275	457.26	485.407	467.332	568.941	349.253	422.839	355.153
VIT_11s0016g01220	915.312	988.823	870.214	200.855	221.87	228.549	349.041	268.323	339.391	87.0061	203.522	50.8234	1020.1	737.768	789.738	884.214	488.818	120.927
VIT_03s0038g00280	620	605.229	591.432	346.363	365.969	360.419	472.706	485.942	459.148	362.616	441.193	680.125	520.481	506.742	569.944	379.931	438.206	552.327
VIT_07s0005g00820	266.087	240.337	266.325	675.628	770.371	594.575	202.387	222.567	214.896	832.904	1090.14	704.694	546.668	511.924	494.126	400.821	460.231	209.922
VIT_14s0060g02140	299.127	266.544	286.524	531.74	762.175	554.516	105.115	124.647	116.372	922.988	1597.27	873.723	277.358	327.427	316.36	435.364	438.891	374.164
VIT_14s0108g01160	471.093	456.33	410.154	469.329	543.498	442.115	188.163	207.265	198.116	644.02	625.522	526.807	526.346	567.494	470.213	563.687	800.568	440.211
VIT_05s0077g02320	191.779	305.553	315.99	601.639	1072.4	887.917	43.1231	55.5433	59.0159	1298.72	1362.46	979.489	117.248	231.429	286.336	141.439	235.68	355.327
VIT_08s0007g02190	1618.33	1237.43	1273.84	193.368	163.18	286.044	527.949	486.579	400.034	11.746	8.9113	14.3625	416.245	319.489	195.088	644.31	418.285	273.155
VIT_01s0150g00310	477.013	659.085	604.09	474.174	491.366	451.602	376.195	369.138	363.028	385.496	660.584	646.932	394.067	570.399	667.846	298.398	337.261	254.953
VIT_19s0140g00120	311.584	263.209	278.688	409.874	602.854	454.621	55.4386	66.3124	61.9877	1018.61	1030.77	1214.11	308.467	348.383	329.895	638.175	596.264	462.458
VIT_14s0060g01720	352.943	438.197	403.386	275.179	260.648	341.049	912.192	995.474	873.608	60.5157	175.542	400.248	577.948	766.295	791.291	302.629	275.089	248.736
VIT_18s0122g00180	782.591	744.439	723.937	271.678	394.286	440.189	361.182	367.656	294.73	181.179	296.304	430.082	204.265	366.975	366.29	841.651	573.251	793.52
VIT_07s0031g00530	507.755	443.92	515.802	95.5806	127.409	170.887	77.7504	198.881	137.56	436.637	1006.23	1332.58	309.701	452.657	604.751	784.381	385.504	732.891
VIT_11s0016g00660	362.517	284.43	399.396	8.00088	11.6721	52.6127	320.405	535.734	552.924	307.519	537.556	904.946	316.071	506.386	746.426	1006.48	589.894	868.381
VIT_05s0049g01790	384.911	627.525	519.183	372.126	440.9	399.756	267.463	288.763	223.689	453.6	696.217	859.026	419.965	688.985	770.999	234.299	328.173	220.434
VIT_17s0000g06670	439.423	557.454	522.472	330.051	361.687	327.946	332.968	320.151	293.924	400.305	713.13	841.651	490.467	636.762	746.459	257.367	307.114	308.236
VIT_00s2086g00010	433.102	473.723	422.457	358.174	491.566	458.644	408.641	353.608	359.125	232.423	294.154	432.641	567.022	626.133	886.881	610.538	495.88	280.839
VIT_07s0005g04350	411.736	319.383	399.612	634.846	789.817	623.67	121.946	137.344	143.155	943.757	897.129	477.844	265.369	308.876	311.58	532.05	453.563	370.297
VIT_08s0040g00040	388.969	454.062	470.232	606.999	610.665	632.821	273.398	284.6	291.667	469.143	633.514	642.132	446.494	611.951	571.237	201.423	246.256	228.705
VIT_18s0122g00960	1049.91	758.927	787.478	202.078	205.333	237.595	550.254	469.137	440.4	176.256	183.187	242.595	342.989	270.341	221.021	796.67	605.156	488.343
VIT_11s0052g01260	943.412	800.853	873.334	52.9733	55.8781	193.138	104.808	76.905	85.0029	614.782	1470.34	715.07	385.227	418.454	404.274	327.145	289.711	141.284
VIT_15s0046g01140	337.555	298.304	353.009	17.8206	16.3053	78.1794	214.635	256.333	269.344	227.172	301.476	643.652	507.348	640.233	609.108	1364.29	823.906	951.307
VIT_07s0005g04340	340.116	278.326	278.233	399.397	579.782	458.81	111.72	113.411	103.697	814.896	1044.23	591.567	313.334	401.39	362.065	686.943	586.138	442.595
VIT_19s0090g01740	383.351	330.997	308.255	426.972	540.789	431.296	126.903	118.711	122.492	1214.04	1269.95	562.88	279.695	297.921	232.75	433.842	478.593	345.841
VIT_12s0057g00420	211.922	197.557	213.473	68.1281	76.2725	103.61	59.997	102.816	110.652	1064.43	978.259	1694.4	253.852	322.754	372.977	547.156	601.419	915.819
VIT_11s0016g00840	533.339	773.056	543.75	257.933	311.483	285.587	206.02	213.944	172.052	336.987	736.094	689.233	422.53	799.749	876.795	223.358	294.51	201.307
VIT_10s0116g01210	456.349	371.276	397.752	424.982	430.42	403	425.956	421.924	440.145	389.408	318.13	480.004	603.84	503.538	504.467	400.117	398.818	490.878
VIT_11s0016g01070	670.302	575.079	682.841	238.143	246.91	322.545	403.385	411.606	408.588	235.193	262.115	475.109	411.766	381.6	408.404	584.847	460.314	642
VIT_02s0025g04130	579.565	443.988	440.509	68.2937	93.2834	137.276	134.682	123.502	118.296	348.805	550.048	641.719	427.866	393.662	370.403	1316.88	1010.19	593.927
VIT_05s0020g02770	520.627	451.938	510.655	181.478	143.38	193.926	745.461	749.352	736.652	80.3235	93.2809	614.754	500.418	459.884	521.459	440.814	369.933	468.729
VIT_00s0125g00280	1773.02	1520.09	1727.37	66.0057	69.241	282.667	129.556	122.278	121.492	55.401	62.5768	56.7413	427.758	353.983	211.625	359.931	265.945	173.995
VIT_06s0004g06840	430.852	332.865	386.285	20.3914	37.7176	91.0571	509.931	532.105	552.134	203.015	255.154	676.337	305.659	372.237	428.247	1102.97	533.407	1002.14
VIT_02s0012g01400	237.637	238.753	241.483	758.895	976.552	749.687	349.051	376.101	350.975	593.533	588.759	469.965	195.604	232.119	215.333	431.4	377.744	352.635
VIT_19s0090g01360	891.738	1211.25	1334.3	44.6239	38.0729	141.353	227.614	117.75	122.413	178.032	191.758	1082.22	122.106	106.536	189.588	283.679	288.593	1057.36
VIT_00s0477g00010	296.039	252.064	303.129	27.0774	33.8613	72.4547	15.1656	18.6339	23.0649	759.308	886.554	1087.16	239.906	275.594	384.554	982.632	875.138	1072.74
VIT_13s0067g02630	270.859	333.709	353.033	133.406	172.465	189.925	166.448	254.331	323.028	607.184	833.158	1178.53	281.433	461.039	488.676	476.612	581.377	494.077
VIT_10s0003g03830	936.374	706.631	737.538	210.688	212.963	238.795	635.299	540.967	486.35	177.389	192.623	207.192	288.813	217.745	139.024	749.32	554.69	365.582
VIT_02s0025g02590	484.488	529.351	545.986	73.6248	69.3703	131.014	289.789	318.233	290.342	200.438	471.435	892.586	271.117	475.649	665.188	594.286	379.702	909.646
VIT_10s0003g00390	440.188	483.408	483.685	195.316	255.315	259.284	214.18	252.099	263.234	534.106	1125.75	914.139	253.308	449.494	507.293	327.896	285.33	294.775
VIT_05s0077g01220	467.386	792.694	686.274	434.061	468.084	480.409	207.799	178.133	207.077	423.013	635.207	578.826	294.579	521.977	569.687	181.087	227.469	161.729
VIT_08s0007g08300	513.376	382.095	432.188	169.109	218.602	257.722	206.157	225.789	223.342	706.803	524.116	590.063	346.282	357.059	317.279	806.006	660.221	578.11
VIT_02s0154g00320	6.87663	14.506	31.2726	370.514	330.329	273.664	24.2706	28.1023	20.5719	89.8601	122.979	26.5284	3469.35	1425.21	796.784	127.666	349.524	5.4107
VIT_17s0000g01910	764.105	540.59	595.847	130.245	120.758	175.161	196.629	207.689	188.679	211.162	200.616	298.97	324.029	215.829	159.093	1513.39	1009.32	629.616
VIT_10s0003g00090	394.453	498.877	439.233	331.881	308.151	387.11	508.493	598.245	575.985	44.8298	61.4713	290.035	758.746	1065.95	976.136	54.5545	94.0758	62.4856
VIT_17s0000g06860	372.072	288.16	320.821	298.592	365.612	330.533	232.549	272.906	270.837	532.871	478.299	590.043	349.513	404.925	390.125	687.597	618.708	615.107
VIT_16s0022g01460	421.108	605.762	551.233	322.642	384.648	373.654	233.548	237.341	215.194	380.843	624.423	669.864	398.24	653.464	749.774	191.045	235.121	169.619
VIT_06s0061g01250	544.282	518.236	544.005	363.901	283.689	334.934	585.051	626.256	560.289	151.152	270.323	305.129	295.142	395.574	478.379	462.769	261.002	426.738
VIT_02s0025g03300	435.232	317.354	352.024	56.5528	67.1878	111.145	125.083	157.895	154.468	314.823	472.87	818.322	370.07	443.376	526.265	1132.74	645.993	891.647
VIT_03s0097g00570	386.751	313.545	337.522	368.346	435.875	392.527	375.674	361.568	344.089	592.269	542.543	378.162	379.207	365.864	331.611	540.731	409.864	521.884
VIT_01s0011g04650	314.126	333.577	366.802	416.115	481.492	524.487	162.988	161.439	166.963	648.011	873.272	636.481	339.753	466.155	391.881	322.027	493.599	263.999
VIT_08s0058g00690	292.216	235.061	298.208	33.2132	40.2739	87.8245	142.801	203.719	200.385	374.215	330.3	991.456	295.869	388.055	414.343	1136.04	840.791	1047.99
VIT_14s0060g02150	437.219	529.548	477.02	308.248	395.829	335.248	54.6735	60.1009	60.71	664.768	1297.85	792.18	275.148	403.248	384.247	286.912	355.547	205.472
VIT_02s0025g00280	19.3181	13.4856	9.26349	1658.79	2592.15	1737.7	29.9916	30.1124	13.2297	86.8869	57.052	9.04497	33.3839	67.9394	37.5561	248.508	288.605	383.361
VIT_02s0025g02780	444.372	630.247	521.003	349.641	400.231	397.648	299.883	308.722	287.077	380.872	546.541	589.481	328.413	495.082	564.616	238.79	284.764	236.061
VIT_07s0031g00920	322.24	246.79	236.488	113.816	128.314	117.154	767.107	985.393	772.232	193.544	143.897	660.557	42.6034	52.5234	135.183	446.49	610.737	1324.14
VIT_08s0007g08520	571.813	807.96	735.259	22.5555	34.041	102.619	213.402	290.135	267.504	170.595	398.776	1082.5	285.959	477.558	520.379	589.117	340.677	373.598
VIT_09s0002g06400	5.10216	63.1657	55.2955	30.5836	26.6659	41.9667	8.82158	7.41087	8.48173	1347.05	2073.51	1516.22	251.658	462.462	598.759	182.178	272.449	328.179
VIT_19s0090g00430	404.694	661.403	534.056	540.676	700.787	592.255	185.109	196.899	172.662	346.262	578.095	632.487	278.59	372.096	433.899	173.702	248.945	224.103
VIT_04s0023g03010	804.189	562.842	652.781	128.506	135.768	186.134	574.151	440.125	410.096	108.051	118.625	182.208	351.819	251.652	162.46	1103.74	624.314	464.45
VIT_04s0044g00110	520.281	580.152	648.294	273.018	323.953	389.326	275.264	263.132	287.096	296.969	363.448	514.664	534.983	538.875	513.896	374.807	280.865	277.447
VIT_18s0001g06180	584.675	479.025	491.986	163.615	159.885	202.23	68.4543	103.109	88.5007	450.882	711.222	835.58	425.335	510.581	631.35	497.964	491.41	327.521
VIT_08s0007g01450	206.695	139.676	162.017	112.578	113.769	122.007	54.1738	59.337	62.2913	402.881	420.151	623.173	639.741	638.555	562.55	949.69	1133.15	802.092
VIT_19s0014g02120	325.193	473.025	413.412	8.31475	18.9397	64.0185	20.7118	32.8827	27.2302	571.465	1247.32	1789.57	211.514	381.116	292.127	458.717	421.83	442.339
VIT_16s0022g00510	135.699	125.575	104.767	1531.49	2290.43	1569.8	70.5654	74.9534	43.4503	12.7914	15.2669	9.442	58.967	88.5484	57.3259	368.519	358.612	236.306
VIT_08s0058g00570	700.83	1029.92	863.69	215.12	203.887	276.513	246.116	265.034	243.735	210.936	378.58	507.578	312.85	451.184	494.347	227.986	283.648	223.52
VIT_00s0317g00130	324.517	474.181	468.174	430.845	543.975	513.382	185.424	192.149	175.842	486.622	615.336	569.246	350.4	555.663	635.117	186.08	242.831	175.288
VIT_15s0046g01500	341.174	382.142	387.808	473.419	579.706	535.616	235.982	226.942	226.688	553.758	700.624	612.321	273.808	326.573	376.716	278.729	264.316	332.017
VIT_06s0004g06010	250.479	204.972	185.793	832.91	1085.03	714.876	405.004	388.317	312.722	173.108	240.243	212.022	218.986	218.448	180.724	478.039	434.62	549.86
VIT_16s0013g00890	166.462	153.733	188.962	561.989	662.155	483.607	10.2726	18.898	18.9848	735.924	1242.05	794.896	257.651	410.426	436.709	422.426	271.436	208.227
ENSRNA049469358	487.643	550.74	416.341	379.21	262.081	433.16	182.732	251.652	310.206	373.516	506.853	537.128	297.152	578.006	418.338	348.588	328.201	349.501
VIT_01s0011g05240	485.175	444.247	485.029	179.027	249.693	235.52	170.178	172.895	145.895	777.498	1254.31	563.646	166.695	244.498	357.317	314.35	326.561	430.332
VIT_15s0021g01330	346.825	515.45	483.948	261.52	281.995	298.786	272.068	271.326	251.472	428.983	547.887	732.13	361.646	500.294	624.186	232.972	285.447	299.352
VIT_18s0001g05220	277.272	250.756	243.196	832.704	1033.39	756.97	202.797	230.413	212.864	378.775	469.394	208.177	152.553	149.857	116.353	633.453	415.54	431.314
VIT_19s0093g00220	641.214	587.659	745.306	302.202	358.849	444.424	367.06	329.225	385.52	272.291	263.567	144.587	286.018	283.664	216.81	674.852	407.235	264.406
VIT_15s0046g01400	449.896	502.86	512.317	497.485	483.557	495.761	340.702	352.891	376.074	307.876	384.159	290.378	236.98	253.271	248.798	461.927	434.126	337.744
VIT_15s0046g01930	374.762	320.867	314.895	361.295	422.694	340.565	180.34	181.551	167.76	639.919	653.661	615.803	347.105	329.662	283.824	505.234	480.695	433.506
VIT_19s0090g01570	331.277	371.952	343.159	382.536	412.527	390.063	344.995	316.026	294.521	429.777	522.833	501.28	374.504	538.985	559.241	229.84	267.865	234.881
VIT_01s0011g03440	68.2662	129.068	146.906	335.955	469.788	419.484	34.2259	55.2087	43.1343	1215.18	1411.2	796.435	149.941	345.572	336.282	327.073	393.772	152.268
VIT_01s0010g02030	59.9202	267.853	249.441	81.0855	109.971	117.086	17.9234	13.3464	16.8703	261.197	778.77	1729.68	489.48	716.845	744.105	258.514	490.968	398.222
VIT_07s0031g00050	223.887	201.06	195.795	409.115	386.282	305.288	440.005	483.552	535.216	393.385	402.941	382.085	381.557	351.863	438.461	289.475	317.022	662.205
VIT_08s0040g02420	414.752	540.57	513.92	373.72	446.635	417.597	218.371	225.218	199.064	395.835	553.577	502.692	321.027	517.859	599.957	152.401	210.84	169.56
VIT_06s0080g00920	1490.21	1463.12	1644.62	69.4043	81.9922	246.932	160.84	146.175	138.314	12.1421	13.0128	27.0591	239.151	195.737	90.7544	340.008	256.519	151.243
VIT_01s0026g02480	638.962	758.189	681.697	248.936	245.909	283.645	322.068	290.743	276.145	79.4866	151.809	420.864	468.931	575.582	439.94	333.012	225.453	283.805
VIT_00s0225g00020	319.782	534.95	477.972	378.318	431.086	425.48	275.651	285.336	279.985	387.941	441.749	496.635	296.347	422.726	482.326	208.807	271.936	215.057
VIT_18s0001g14700	254.988	233.399	239.779	481.541	762.315	594.596	138.474	153.055	139.059	792.096	774.91	463.098	141.016	218.073	155.033	354.477	341.847	393.662
VIT_18s0041g02020	327.61	233.2	269.751	543.543	796.572	663.485	106.501	159.127	253.897	633.991	504.902	788.317	169.698	275.381	287.239	177.905	113.507	309.602
VIT_16s0098g01000	306.199	318.025	349.182	30.8737	52.8986	82.534	432.136	551.984	486.763	127.404	222.945	402.627	304.73	523.636	528.513	948.301	438.132	487.696
VIT_05s0020g03470	328.87	270.502	285.759	390.406	431.183	373.046	452.152	404.158	431.262	323.434	349.17	524.304	339.97	355.908	362.141	300.909	302.796	351.606
VIT_04s0008g00700	240.942	295.607	204.511	84.1663	76.9155	75.7802	95.2036	80.0566	75.0425	152.165	714.569	417.434	502.188	551.055	560.207	908.887	967.934	559.369
VIT_02s0025g03600	140.892	154.475	137.458	925.001	1336.37	1003.5	148.716	162.285	171.884	391.729	337.781	325.027	147.777	173.069	193.563	220.725	225.4	348.304
VIT_10s0003g01730	330.459	229.115	266.228	102.441	147.591	150.135	272.634	295.259	315.202	510.399	500.341	662.797	328.22	368.486	445.394	610.887	404.478	602.877
VIT_18s0041g00370	309.481	461.711	382.876	331.273	279.821	393.782	176.656	120.107	120.859	399.851	390.476	1124.2	254.231	249.774	262.587	585.98	430.193	254.343
VIT_09s0002g02600	318.783	345.888	344.949	395.466	469.952	407.779	152.292	171.884	168.484	610.707	639.75	554.107	305.062	323.667	328.877	299.322	343.19	324.784
VIT_07s0104g00420	321.311	313.816	304.079	527.819	586.412	488.177	627.204	577.151	600.198	218.668	292.93	272.067	197.175	251.797	237.006	264.932	214.756	195.624
VIT_13s0064g01210	298.797	284.017	285.839	376.483	383.797	388.277	308.865	284.367	267.126	389.3	492.028	925.152	226.026	359.561	366.887	188.043	213.229	443.63
VIT_11s0052g01300	791.3	619.434	700.723	30.3568	33.1429	179.295	32.9024	24.5916	29.8554	407.421	994.351	639.907	273.649	411.12	528.08	338.281	294.502	152.431
VIT_05s0029g00420	440.466	430.461	441.337	483.977	469.459	400.144	152.446	187.381	175.511	414.408	365.084	194.791	605.276	530.017	439.559	221.973	378.103	133.304
VIT_01s0011g01820	404.284	572.528	499.007	278.565	338.578	306.559	232.958	241.405	203.283	284.312	491.264	583.676	323.199	506.37	560.089	194.891	241.143	193.463
VIT_04s0008g02460	356.295	240.659	247.886	361.697	364.943	331.202	369.03	397.266	414.497	437.337	306.581	320.411	375.879	250.959	301.768	436.001	489.247	449.175
VIT_00s0463g00020	530.722	386.045	476.378	28.9399	22.3845	89.6306	440.921	457.916	449.507	78.0969	147.108	394.639	244.571	288.536	368.647	807.907	462.752	755.973
VIT_05s0020g03190	263.109	299.481	286.678	76.8142	76.6995	96.9778	83.7822	107.458	113.949	636.876	903.947	1193.03	129.963	244.32	284.12	424.24	344.082	857.761
VIT_18s0001g11630	170.008	216.244	198.806	490.28	750.85	454.627	15.5436	23.2505	17.7414	1415.59	1239.06	854.599	68.5059	102.525	106.918	65.7536	101.658	126.88
VIT_01s0127g00450	599.49	643.677	642.822	301.841	324.593	328.184	238.209	246.369	247.719	188.011	292.789	567.95	315.487	368.679	363.913	211.826	218.552	296.433
VIT_03s0038g04100	351.398	339.187	288.016	244.979	255.583	199.48	32.9876	44.6836	39.4041	668.965	870.287	621.762	293.705	318.327	334.746	534.335	422.381	530.725
VIT_03s0063g02110	272.862	285.521	262.793	431.126	451.677	427.815	182.309	189.497	186.121	470.988	576.446	641.134	251.714	375.261	349.638	292.284	309.213	426.15
VIT_14s0030g01810	334.039	348.872	361.96	373.793	423.92	387.428	299.735	273.495	258.728	469.789	493.658	446.197	304.995	407.989	440.208	242.677	269.263	231.358
VIT_15s0048g02420	496.281	328.47	347.488	220.021	187.72	190.589	614.467	549.083	549.879	68.1943	89.1595	83.1564	68.9486	41.2575	22.7923	1015.26	761.338	732.802
VIT_18s0001g08760	7.39895	18.8814	11.428	84.299	93.3503	89.5522	21.0574	39.3645	28.907	2481.58	2364.54	788.205	18.7298	33.313	56.738	21.1264	116.449	54.8782
VIT_15s0046g03570	181.636	159.596	174.121	150.394	159.487	170.351	146.455	138.899	147.147	490.394	489.372	377.11	573.972	672.073	544.523	694.843	589.516	461.796
VIT_05s0020g01400	428.036	326.439	327.253	324.794	457.71	343.895	125.28	145.282	129.241	642.274	545.232	498.556	235.443	294.517	294.04	426.145	436.225	335.142
VIT_00s0194g00030	111.707	103.58	99.2563	726.191	905.576	689.29	183.491	201.642	154.82	436.365	282.538	122.812	215.687	216.928	210.547	473.904	584.077	595.819
VIT_19s0014g03290	64.4627	82.7872	83.0673	662.974	829.334	647.152	154.438	162.575	194.917	791.022	930.374	792.598	53.6798	104.789	162.664	119.763	130.464	331.631
VIT_13s0064g01050	294.123	242.283	235.34	349.169	405.372	301.379	253.113	216.19	203.586	557.78	626.592	455.348	304.507	295.655	320.233	406.981	381.723	407.341
VIT_08s0007g04790	230.027	231.706	205.908	327.235	389.864	312.742	31.0616	34.7473	26.6969	1214.07	1575.72	486.15	186.405	273.452	208.653	164.342	267.431	87.862
VIT_03s0180g00070	998.798	1129.28	1099.55	63.0268	56.7753	203.293	195.836	163.81	144.749	186.438	255.951	158.07	217.274	175.419	147.081	512.258	346.09	198.741
VIT_08s0040g00890	355.294	365.711	330.838	380.962	353.209	368.405	306.175	273.236	299.53	228.421	381.97	653.359	300.683	427.006	389.278	238.38	300.367	295.658
VIT_06s0004g06640	456.147	313.733	334.528	215.873	253.481	216.414	546.356	481.287	398.435	208.332	206.691	233.691	147.139	117.998	121.385	858.092	636.429	481.101
VIT_06s0009g01910	296.412	420.855	384.294	338.399	379.425	347.438	222.326	240.487	269.663	331.462	435.326	542.88	369.781	430.438	491.787	200.768	277.255	234.749
VIT_13s0019g02050	1266.2	903.737	963.739	76.8666	86.0057	185.572	535.625	475.315	368.505	2.64542	5.80563	5.09068	270.594	156.011	89.7498	477.008	225.779	116.79
VIT_06s0004g04010	279.942	196.757	208.519	76.0027	83.3352	110.592	89.6881	126.424	156.411	745.013	723.676	1097.86	238.536	298.913	392.084	383.419	286.017	717.682
VIT_14s0068g02040	277.93	285.725	308.898	523.976	624.608	573.775	79.5253	98.6918	91.0372	654.305	617.241	294.386	293.925	401.998	413.019	225.542	228.227	213.744
VIT_13s0073g00120	371.646	511.97	470.973	286.032	309.53	309.427	228.173	229.451	218.757	386.733	469.844	449.303	310.671	449.282	506.261	216.735	266.688	205.875
VIT_14s0083g00580	223.031	209.689	202.704	564.869	587.389	486.201	425.109	361.135	468.451	487.107	668.066	363.347	157.459	156.655	145.546	218.036	242.371	227.097
VIT_15s0048g00530	299.414	303.953	322.923	95.5572	110.247	146.824	148.147	170.253	180.285	453.026	550.996	873.403	218.69	267.482	166.174	821.131	509.394	551.872
VIT_07s0031g02390	354.272	290.456	342.722	115.671	126.138	155.45	164.414	174.288	171.953	232.04	226.075	684.551	355.484	421.598	411.092	737.379	562.348	661.538
VIT_03s0017g01460	232.827	425.323	409.02	112.423	101.99	203.736	20.2662	23.1854	23.7185	432.941	622.279	851.765	286.25	683.736	514.037	231.58	516.741	491.538
VIT_02s0012g01320	372.893	308.896	312.045	268.888	297.49	278	149.542	173.873	151.205	494.401	541.255	511.505	264.165	312.009	343.999	481.058	378.609	521.145
VIT_06s0004g04470	145.592	100.705	107.266	748.187	1014.77	750.134	149.435	165.433	122.085	152.08	147.369	153.285	153.369	189.994	181.796	596.806	507.078	771.4
VIT_03s0038g03800	257.563	224.714	248.539	100.957	124.384	138.076	33.3849	43.1125	35.1967	264.296	320.6	991.089	353.34	478.281	450.119	662.006	519.889	893.83
VIT_13s0019g01090	586.368	537.769	557.053	237.882	252.02	255.696	176.981	177.873	167.23	322.393	367.921	310.943	318.993	317.42	338.845	444.333	454.802	279.667
VIT_04s0008g06540	313.724	402.029	370.956	452.863	471.277	449.873	226.264	245.835	262.206	306.337	435.444	457.927	257.677	398.477	461.636	169.726	229.634	179.59
VIT_03s0063g00050	293.651	225.36	258.887	275.211	414.168	350.421	39.7299	45.5733	49.5148	448.354	593.096	599.316	255.906	332.336	401.783	616.668	344.204	541.739
VIT_10s0003g00530	363.005	437.149	486.244	377.496	456.026	469.285	223.597	232.571	214.755	354.75	363.959	439.011	273.506	350.49	388.687	199.376	217.204	210.615
VIT_01s0127g00700	186.453	142.287	191.008	88.571	141.76	150.679	58.8566	103.745	90.5829	459.262	505.557	812.652	381.247	580.956	682.463	651.071	401.971	427.512
VIT_18s0122g00300	296.417	232.814	305.434	92.0552	115.977	157.59	148.235	189.749	208.19	462.146	611.843	645.493	258.657	370.042	439.01	674.632	317.851	513.902
VIT_02s0109g00080	585.943	421.241	477.088	206.351	206.933	215.144	510.407	413.861	408.524	198.077	154.619	158.045	225.394	171.213	114.516	697.959	488.85	368.723
VIT_02s0033g01030	379.886	437.861	373.229	173.824	233.839	194.768	10.872	23.7384	19.0377	650.96	712.83	703.833	83.3181	162.297	185.009	502.32	408.313	761.266
VIT_07s0005g00840	333.144	389.182	420.346	363.218	386.455	385.49	264.04	273.263	243.341	315.701	345.244	367.687	326.224	394.97	444.12	253.374	288.783	210.361
VIT_04s0023g02450	527.74	542.585	561.259	223.513	214.687	261.654	356.785	345.77	337.529	162.853	176.448	272.42	307.297	282.741	345.575	375.499	332.414	374.912
VIT_11s0016g03630	536.543	565.154	534.69	296.425	311.216	310.375	282.574	258.095	250.507	172.798	283.821	439.583	320.796	366.311	404.619	206.741	209.756	232.571
VIT_16s0050g02240	965.335	1028.38	1143.15	110.17	122.701	184.888	131.463	115.97	127.701	100.886	166.529	173.861	349.989	292.261	298.475	278.886	211.41	159.996
VIT_16s0100g00400	325.518	286.064	298.908	504.432	791.097	567.135	53.8712	58.739	73.1291	298.639	375.187	599.159	177.957	314.332	319.253	191.31	427.463	289.857
VIT_07s0129g01050	468.754	418.279	404.843	293.929	381.63	351.627	172.99	158.734	146.879	581.69	692.137	558.405	233.863	258.016	219.463	193.581	213.802	196.359
VIT_18s0001g06170	1042.8	809.693	869.555	27.7098	25.1362	147.46	100.716	101.61	102.102	256.47	468.348	475.314	266.059	319.31	427.477	186.848	191.398	110.561
VIT_14s0108g01000	404.972	432.34	400.478	2.38852	2.69988	64.9919	172.443	168.228	136.586	83.343	220.588	1054.73	197.543	349.813	486.746	638.596	403.138	705.821
VIT_05s0020g01910	336.066	235.039	229.824	247.273	263.346	245.211	494.222	384.465	417.951	563.157	599.93	437.69	160.665	259.507	175.102	252.343	289.178	330.04
VIT_04s0008g04000	981.589	1174.85	953.17	275.802	289.758	365.868	254.245	268.055	264.766	12.7009	18.2428	7.49727	298.907	292.362	296.318	45.8633	99.3999	14.1449
VIT_18s0001g05250	272.782	231.467	220.449	498.756	607.068	422.817	236.622	267.259	272.772	412.106	441.49	242.415	200.844	217.592	186.269	430.373	427.713	312.392
VIT_14s0068g00850	430.41	320.561	335.326	264.951	296.143	266.728	313.339	300.896	321.1	229.528	172.298	231.306	241.457	267.693	213.572	596.512	576.71	517.756
VIT_08s0007g03960	250.166	283.415	275.566	320.921	378.399	316.839	324.516	337.148	301.097	554.386	438.814	427.352	299.721	311.449	418.352	164.759	234.552	240.652
VIT_14s0060g00480	244.603	262.214	228.122	259.029	250.102	239.697	84.1361	100.716	106.315	1077.14	832.981	388.081	334.909	257.472	234.807	289.092	420.589	257.757
VIT_13s0019g03990	239.245	215.748	220.128	188.762	257.651	225.289	60.1968	86.5797	75.4679	785.576	837.47	838.909	218.884	297.529	277.602	334.032	305.311	400.854
VIT_11s0016g02950	320.64	334.629	349.388	424.519	507.077	486.542	149.898	152.6	146.4	325.684	409.57	484.136	168.192	249.913	257.383	292.898	322.838	473.702
VIT_10s0003g02610	283.154	237.702	253.974	898.716	985.517	745.865	134.004	110.342	107.737	296.084	381.861	327.93	153.192	170.732	143.459	199.943	203.413	217.572
VIT_17s0000g09780	267.21	340.833	318.719	344.788	417.34	327.748	339.404	373.602	313.354	143.077	258.114	364.538	345.617	494.923	614.297	167.32	257.564	157.407
VIT_18s0001g13610	113.89	91.7209	96.4017	127.911	129.696	154.168	26.539	35.1864	33.832	930.409	872.432	703.995	261.537	350.678	322.353	562.162	536.306	491.493
VIT_06s0004g05090	330.303	237.184	259.296	105.771	131.66	136.437	347.397	371.266	336.973	305.1	409.542	578.454	252.661	320.051	327.176	559.422	328.734	490.536
VIT_12s0028g02020	326.462	429.124	394.131	291.828	320.892	319.65	201.134	210.236	236.646	334.082	373.914	539.163	288.572	366.313	404.822	230.127	275.787	280.136
VIT_03s0017g01410	288.598	343.291	334.31	986.278	1261.74	1182.55	400.816	433.32	420.852	10.9162	25.2793	41.9933	8.5438	25.9599	17.8129	6.99013	16.7577	12.6998
VIT_13s0019g03350	627.408	498.887	535.255	180.951	176.487	208.778	464.385	371.976	375.687	154.522	171.899	196.41	310.275	252.974	173	481.885	348.668	286.657
VIT_16s0013g01110	283.472	209.542	244.503	8.24089	6.49239	42.9785	228.742	216.817	200.996	65.1422	194.146	731.425	209.413	294.998	405.127	950.469	517.473	1002.32
VIT_05s0062g00310	302.548	205.379	285.992	160.735	251.309	281.049	17.1373	30.1461	50.539	915.616	640.244	647.977	232.601	357.296	381.51	421.678	327.958	288.785
VIT_19s0014g02240	454.352	377.545	461.451	110.649	164.278	177.183	175.432	187.456	153.218	364.325	584.6	249.9	243.29	305.788	306.533	825.227	356.835	298.595
VIT_06s0061g00410	314.394	314.749	284.886	350.338	328.341	325.68	364.549	325.669	298.92	341.003	331.129	466.753	320.688	373.698	360.569	185.55	203.823	296.338
VIT_08s0007g00120	304.429	309.63	313.008	664.854	748.923	630.375	304.767	294.194	325.456	209.668	317.399	347.684	111.764	183.104	166.085	175.902	208.025	169.512
VIT_03s0038g03960	352.109	303.732	309.342	368.324	404.59	390.047	91.8174	104.711	92.6503	586.695	546.439	319.97	272.391	311.129	232.49	405.034	410.775	270.84
VIT_14s0066g02060	225.807	205.558	240.317	31.565	39.3104	69.8656	21.0571	34.5025	23.6857	1214.52	966.367	347.151	96.741	112.188	137.304	843.464	801.567	343.205
VIT_01s0026g01460	338.805	547.571	588.446	41.7888	51.6545	145.958	245.946	199.922	218.67	407.682	425.161	507.399	350.752	303.653	393.514	376.407	330.399	276.89
VIT_14s0060g02110	246.661	441.693	349.65	341.22	385.154	353.027	211.76	233.646	218.783	284.189	464.496	484.109	257.752	459.097	539.664	141.203	204.527	132.061
VIT_19s0015g00130	184.224	150.06	176.856	465.515	728.825	597.723	96.366	116.754	97.3076	422.597	434.491	569.296	174.68	264.706	336.044	318.428	271.846	329.872
VIT_07s0031g01300	387.114	463.795	458.91	246.205	279.107	302.075	146.863	164.737	155.014	377.205	364.408	352.757	406.9	495.05	441.7	250.84	258.879	178.484
VIT_13s0019g04390	406.242	364.876	350.844	159.021	180.762	192.644	104.312	101.65	111.407	487.614	578.843	299.655	421.852	390.781	344.412	459.356	476.676	278.794
VIT_03s0088g00810	391.744	996.938	650.319	546.981	269.275	436.115	436.802	1020.51	954.513	0	0	0.276149	0.209197	0.431627	0.683308	0.536285	0.338331	0
VIT_08s0032g01150	216.431	181.718	209.434	43.4775	47.9707	82.9775	242.708	278.093	291.234	467.459	374.066	656.74	215.014	316.063	369.294	541.378	472.57	673.618
VIT_11s0037g00300	214.933	207.583	222.596	234.186	319.777	288.201	54.3655	61.0956	60.629	854.961	662.134	621.38	179.257	214.019	177.155	412.492	314.119	551.877
VIT_08s0040g01820	369.197	453.568	417.194	17.3759	17.8301	42.1735	26.4509	24.6784	26.4188	147.808	603.34	1561.62	225.989	366.594	478.393	207.997	190.887	472.163
VIT_13s0019g01440	68.7873	61.0156	46.6671	5.67672	6.22229	7.96941	2.8088	2.53404	0.804882	602.478	908.164	639.977	356.84	291.587	290.885	697.615	816.498	841.912
VIT_04s0008g01070	336.258	260.951	262.239	15.5933	14.5899	54.2063	264.358	270.141	279.286	101.845	135.757	479.324	253.33	291.521	284.912	904.643	623.357	808.429
VIT_17s0053g00620	342.121	427.682	420.858	318.569	368.33	367.398	261.655	272.169	252.455	266.924	377.096	437.96	235.425	329.897	409.721	166.846	193.584	184.893
VIT_08s0040g03100	250.234	187.408	207.598	484.793	648.29	645.349	82.2144	108.658	121.846	495.839	546.773	387.207	202.912	270.399	269.507	263.186	241.009	219.724
VIT_14s0068g01940	249.28	441.635	376.295	448.537	511.878	432.591	184.086	201.369	197.441	366.722	441.126	433.141	221.241	308.389	361.463	126.012	178.871	150.617
VIT_12s0028g02340	354.418	307.292	324.257	286.934	301.657	253.216	406.497	373.447	341.138	311.618	317.492	344.291	277.346	296.699	361.322	236.361	252.444	279.207
VIT_06s0061g01120	372.24	352.787	304.856	567.153	650.013	465.943	49.1763	50.7387	48.329	627.637	763.334	268.451	173.517	192.388	148.032	200.269	228.999	146.662
VIT_10s0003g02650	273.186	414.372	387.24	271.759	272.274	281.535	179.131	188.244	169.909	374.65	483.366	457.194	299.479	454.3	527.147	157.874	216.366	154.971
VIT_17s0000g03530	342.255	384.521	383.189	348.519	382.63	367.285	217.013	204.804	202.98	390.586	413.479	379.218	253.219	351.448	398.999	164.64	192.326	183.018
VIT_17s0000g07670	293.216	342.437	336.678	41.4719	70.5788	107.245	67.9376	80.7863	70.0914	359.89	710.255	1230.06	200.938	350.53	371.51	308.8	246.14	366.312
VIT_12s0057g01430	170.373	202.975	200.566	89.0497	118.803	128.046	226.745	294.979	254.653	603.08	519.726	515.745	183.352	283.673	246.105	507.039	734.248	260.262
VIT_02s0025g00350	206.216	189.267	203.991	264.616	343.282	345.63	231.143	253.363	246.786	320.519	322.088	456.964	156.352	223.031	220.891	438.077	469.246	640.209
VIT_11s0052g00290	281.427	345.429	358.054	282.475	338.253	331.833	248.467	241.295	213.487	439.253	412.659	383.642	295.032	370.064	450.239	166.337	205.115	156.897
VIT_08s0007g04210	341.099	377.252	428.25	272.333	327.646	286.48	219.788	212.202	197.065	367.409	432.547	408.57	264.433	335.903	398.005	220.602	230.539	195.481
VIT_01s0011g04630	294.983	288.15	286.25	163.776	206.191	208.131	98.4868	100.731	88.9941	731.488	690.588	712.682	109.187	175.907	229.135	313.482	268.889	538.944
VIT_13s0019g02180	73.0866	66.4966	72.7427	689.695	793.021	582.537	319.541	346.46	334.1	361.428	353.788	543.306	76.5855	172.758	441.854	31.0522	52.5038	170.578
VIT_15s0046g01760	249.925	248.082	262.949	440.819	560.126	437.533	169.733	179.787	172.27	363.988	436.482	286.442	297.759	294.801	256.51	275.752	311.853	235.073
VIT_14s0060g01280	530.839	342.017	343.255	209.093	187.232	193.514	517.61	459.992	472.718	68.3626	58.1503	187.219	403.111	250.627	221.12	341.115	262.881	378.755
VIT_15s0046g02020	286.727	253.57	245.745	292.81	370.153	289.645	206.395	208.05	196.367	436.286	547.111	413.25	235.306	259.62	226.209	332.507	294.769	319.022
VIT_16s0098g01190	261.396	403.978	427.339	360.964	436.617	412.847	192.41	215.857	198.527	366.629	365.705	352.091	242.366	338.012	432.394	123.59	174.372	107.145
VIT_16s0100g00860	76.9259	125.213	97.8659	145.529	161.301	152.265	7.21591	9.14453	15.9718	795.704	899.685	1094.32	330.459	501.604	444.054	118.19	193.167	212.633
VIT_11s0103g00220	312.115	479.226	431.912	243.012	296.307	288.226	153.912	167.224	155.458	334.952	444.955	437.803	278.757	386.2	509.743	136.322	180.567	131.691
VIT_01s0127g00440	264.705	308.267	282.246	229.55	256.126	236.954	172.959	170.925	167.849	411.587	568.466	523.394	347.782	396.042	381.356	184.029	233.96	214.855
VIT_13s0019g00250	242.863	315.378	307.269	340.707	360.691	344.262	224.092	209.008	212.408	375.15	430.043	385.903	243.991	377.46	434.146	170.241	205.786	154.317
VIT_18s0041g00390	629.345	907.17	865.504	148.597	169.938	277.236	145.796	109.555	102.889	199.291	244.475	642.135	102.84	135.429	97.0094	275.82	170.981	104.379
VIT_06s0004g08230	249.997	186.03	178.45	176.273	174.793	168.22	558.392	529.527	539.267	273.95	291.773	180.855	333.366	225.003	165.619	464.981	345.33	265.716
VIT_06s0061g00440	399.771	313.393	344.428	144.764	114.286	203.787	383.809	377.146	361.7	194.509	260.718	136	310.682	406.152	448.405	405.158	338.301	163.717
VIT_08s0058g00560	144.234	156.265	164.717	159.11	190.813	187.078	70.1573	81.63	96.9915	781.288	748.436	513.161	228.862	244.828	204.477	478.595	442.357	397.767
VIT_03s0091g00810	288.282	400.839	433.309	71.9689	74.2122	100.475	62.4266	92.6543	108.867	434.773	656.932	727.384	211.152	297.279	374.804	318.655	266.136	327.186
VIT_04s0008g00720	329.504	283.433	269.811	226.015	215.765	218.398	365.139	347.968	373.764	145.039	162.123	342.599	436.123	384.119	377.023	213.053	225.773	331.129
VIT_17s0119g00050	297.785	376.66	418.221	464.534	562.059	518.487	245.222	254.185	235.688	229.359	274.6	241.412	169.652	245.668	312.2	126.982	160.567	107.14
VIT_18s0001g11290	263.339	209.142	216.636	154.47	174.934	166.615	74.0524	95.6852	96.7332	368.788	459.963	566.54	276.514	315.893	317.2	559.374	465.516	458.925
VIT_19s0014g03850	580.151	566.632	582.327	92.3605	92.2895	125.372	223.085	184.172	176.843	207.465	255.485	255.258	255.459	228.335	165.739	541.074	402.953	293.936
VIT_00s0698g00010	634.32	545.229	565.588	604.656	532.282	531.937	532.902	517.194	658.922	3.46326	4.84517	4.02967	25.7722	24.9152	24.3806	1.10806	2.3593	1.35056
VIT_01s0011g05250	327.097	357.113	324.966	137.125	202.311	185.97	109.437	114.398	92.5056	642.365	959.762	434.138	133.61	202.599	263.467	218.142	221.375	284.665
VIT_13s0067g01120	56.154	83.4774	62.8567	146.746	178.84	144.986	13.8294	17.7625	14.3242	1583.07	1486.57	866.466	58.3471	124.154	133.607	48.7788	64.9216	119.29
VIT_05s0020g04790	224.609	338.996	320.097	312.539	362.105	303.761	184.323	189.783	179.456	347.135	461.181	429.789	236.454	344.53	415.679	169.432	212.395	170.221
VIT_17s0000g02950	199.513	211.265	205.325	369.363	515.218	409.777	385.307	416.754	403.594	191.838	247.931	273.345	132.561	131.956	117.357	393.995	314.7	281.316
VIT_08s0007g02580	271.962	281.194	269.447	303.742	317.378	288.742	182.104	192.746	204.12	283.137	344.336	367.701	341.066	396.103	376.322	258.425	281.937	237.723
VIT_03s0091g00560	224.284	232.163	247.663	265.141	326.511	274.025	159.955	218.056	199.504	458.23	510.794	462.264	185.865	218.305	219.746	289.721	353.991	335.533
VIT_17s0000g06980	217.499	315.208	318.863	287.283	320.037	296.233	182.455	193.06	174.472	332.979	452.722	454.844	262.911	389.04	445.492	162.062	210.701	158.425
VIT_16s0022g01440	494.882	325.652	358.193	157.071	152.216	163.063	421.6	347.903	305.248	234.802	152.54	152.616	353.92	237.92	199.253	490.651	325.197	293.625
VIT_00s0620g00020	289.708	345.535	349.294	294.236	357.78	311.379	241.901	230.965	216.327	293.963	322.804	327.061	264.089	327.806	354.817	196.816	217.843	200.79
VIT_09s0002g00470	138.948	118.709	116.333	495.667	515.346	404.509	240.782	249.998	238.9	339.856	329.039	381.487	294.884	276.628	267.829	176.112	197.749	351.179
VIT_18s0072g00550	246.798	192.324	241.968	51.6988	69.4361	82.517	301.319	332.335	315.93	171.398	173.824	334.422	310.182	384.122	403.714	654.73	358.269	498.175
VIT_18s0001g15640	28.9322	36.31	38.0308	166.551	155.471	125.186	228.678	224.346	218.319	359.088	460.467	362.871	333.058	398.84	433.851	449.345	577.398	515.007
VIT_03s0063g02030	322.138	295.246	290.515	220.102	229.134	212.384	230.103	200.643	188.765	657.362	436.053	245.754	135.799	130.31	141.022	460.312	405.357	305.714
VIT_18s0001g04160	279.78	250.371	266.605	346.601	392.708	365.833	175.096	168.71	157.134	472.264	394.726	298.699	186.15	210.553	208.322	325.266	286.631	317.969
VIT_04s0008g05850	349.787	316.681	340.175	160.049	204.995	194.576	106.587	119.798	106.404	352.118	487.944	850.661	164.633	202.869	202.018	348.899	217.976	346.359
VIT_05s0029g00220	261.809	396.712	294.738	112.768	156.583	161.507	72.4821	65.0171	73.9526	220.465	498.109	668.966	345.461	506.036	485.404	225.599	261.157	250.565
VIT_18s0001g13630	220.18	264.885	244.742	244.803	277.022	211.672	155.494	152.363	147.3	385.269	629.476	482.838	247.788	280.81	312.683	237.563	270.041	288.493
VIT_08s0040g02330	338.733	318.416	307.396	306.678	307.378	272.182	371.196	355.035	327.595	239.263	237.599	261.441	242.751	237.597	247.171	246.532	224.849	209.943
VIT_11s0065g00370	298.408	296.085	317.572	450.086	387.618	381.579	338.966	355.814	303.355	135.286	172.657	326.953	206.919	271.32	234.811	150.49	178.739	227.81
VIT_03s0017g00650	193.401	146.093	166.281	74.2888	83.0142	109.456	56.0188	76.3863	64.0996	795.589	712.753	672.504	229.447	322.033	275.094	380.189	333.819	332.783
VIT_02s0025g02800	412.377	626.419	512.511	205.907	242.001	272.762	107.434	114.158	96.8408	242.476	522.168	481.779	148.357	241.764	239.838	222.153	174.082	155.568
VIT_14s0006g00180	331.051	270.952	251.643	71.1404	82.1958	97.2948	182.912	196.786	199.903	391.068	530.574	292.609	407.369	353.946	387.39	413.759	320.976	231.67
VIT_07s0031g01630	292.945	349.112	312.203	492.747	619.238	515.109	58.8398	53.9549	63.4914	240.749	329.339	212.63	212.186	300.538	276.763	199.569	317.063	161.757
VIT_05s0077g01840	302.764	375.153	375.291	287.688	321.22	315.725	234.653	230.864	209.536	290.108	313.401	315.464	239.191	303.29	368.346	163.266	206.322	148.743
VIT_01s0011g00560	307.341	251.45	266.27	467.865	487.693	421.423	253.674	238.699	282.28	142.793	200.498	574.986	149.56	216.798	207.681	122.957	108.507	297.496
VIT_04s0008g01730	1054.93	1249.63	1210.39	75.2453	73.6585	210.951	154.768	148.561	137.325	6.29456	8.29572	13.8271	142.472	134.448	70.0049	143.282	94.4967	61.6814
VIT_07s0005g04920	847.46	916.429	1116.87	56.3203	65.5236	153.645	116.454	122.218	114.738	26.7075	46.9099	59.3928	256.788	213.972	144.195	299.304	250.596	177.681
VIT_13s0019g01100	240.98	200.12	222.743	84.5175	88.4242	115.076	223.646	209.306	189.208	708.072	856.098	425.126	143.257	222.207	243.551	274.545	248.127	282.463
VIT_18s0001g11710	1127.65	1016.89	1118.84	79.8174	78.7555	209.725	185.271	176.957	132.852	11.0064	10.5453	9.37191	162.575	161.395	102.864	179.783	129.278	78.0079
VIT_18s0001g09330	316.64	409.961	330.802	405.172	413.079	367.139	127.37	129.964	139.425	257.744	459.378	340.107	182.256	243.967	278.238	182.604	224.548	155.454
VIT_15s0048g00670	220.567	312.346	298.514	291.366	324.335	289.145	172.999	183.13	181.79	364.384	405.81	409.948	247.256	344.801	410.364	159.588	199.532	147.651
VIT_12s0028g03550	266.44	302.368	325.023	50.0996	41.719	85.1393	21.3353	29.4248	28.9202	483.734	1466.17	858.806	84.8457	203.321	201	179.166	187.211	142.185
VIT_03s0017g01210	169.046	214.643	182.999	511.96	437.335	310.494	199.678	227.467	261.281	196.962	306.136	125.999	617.55	467.511	482.95	64.7787	121.69	46.8373
VIT_18s0001g09420	153.876	157.885	145.966	287.881	300.934	257.819	178.486	177.003	176.719	432.926	531.87	478.059	231.017	301.48	316.916	205.328	255.231	349.451
VIT_14s0006g02570	1266.25	1445.95	973	101.304	117.657	231.109	203.332	234.12	173.903	1.23259	4.40923	17.2246	27.5977	24.288	18.668	22.0773	29.8742	33.4532
VIT_09s0002g02560	294.224	391.14	392.76	247.422	277.272	282.286	181.647	191.729	167.437	311.211	362.575	336.565	229.289	347.68	423.353	148.611	188.398	147.088
VIT_05s0029g00240	204.031	144.596	176.934	201.383	213.76	172.71	827.376	807.336	861.693	62.384	62.4014	110.857	117.774	86.6228	86.1688	299.478	243.565	240.547
VIT_08s0007g08390	230.553	364.722	307.669	281.533	331.561	296.079	129.903	141.11	144.521	269.239	431.408	475.215	251.906	332.247	383.809	161.775	206.591	177.847
VIT_14s0108g00460	263.416	377.07	345.486	239.025	274.143	250.907	227.17	227.1	211.681	263.473	328.172	350.454	254.123	365.583	460.477	138.445	186.891	140.812
VIT_08s0007g07290	138.207	144.507	130.558	220.221	261.098	223.81	100.302	94.1094	104.925	465.301	730.03	657.952	220.676	344.635	277.742	252.796	274.627	260.961
VIT_19s0014g03320	518.414	463.812	444.837	197.27	198.607	207.612	329.383	277.581	289.209	59.5611	85.7903	206.919	251.735	252.926	199.799	379.587	273.194	261.679
VIT_17s0000g06450	567.043	469.793	586.453	183.174	178.95	234.53	262.445	240.128	230.017	111.564	130.945	123.842	223.866	188.387	128.774	459.581	350.239	207.623
VIT_17s0000g00580	317.015	374.218	413.036	278.769	307.631	348.654	147.893	164.935	158.716	302.7	295.448	340.891	280.108	331.916	331.061	149.718	190.23	138.616
VIT_08s0007g07680	439.45	449.067	433.372	199.972	201.96	201.893	235.837	228.463	215.117	165.947	263.717	278.973	298.627	311.018	297.502	222.793	232.009	172.654
VIT_14s0066g00960	233.89	338.239	294.816	261.063	287.913	255.097	182.848	179.295	164.951	271.869	323.45	482.421	246.317	354.679	393.115	170.127	217.878	189.524
VIT_14s0108g00850	316.023	478.192	427.201	285.544	344.645	352.321	172.52	184.319	146.655	259.807	312.215	277.733	218.248	348.75	402.079	109.252	120.256	87.1214
VIT_15s0048g02070	374.228	357.577	437.087	3.50088	3.91564	57.3355	35.8885	52.1966	40.8903	115.037	209.621	730.955	203.543	359.366	409.86	540.635	278.66	620.735
VIT_16s0050g01690	257.478	200.951	238.398	56.3895	90.0061	109.366	103.954	114.182	116.86	272.398	210.893	352.008	226.259	264.123	258.366	713.928	492.515	736.961
VIT_15s0021g01420	213.307	223.748	241.969	337.115	402.236	342.697	234.685	241.047	204.027	286.441	288.367	331.168	239.398	266.318	304.223	210.333	211.471	235.118
VIT_18s0001g02020	283.945	222.208	273.81	72.4396	83.2661	109.916	277.254	324.338	314.894	189.18	146.231	487.124	155.451	187.59	247.568	518.52	429.361	485.803
VIT_13s0019g04140	966.548	826.518	871.637	68.1875	67.346	145.157	109.045	115.271	86.9769	1.82144	1.81687	1.78174	132.855	132.993	48.7483	626.783	387.492	216.216
VIT_04s0008g06870	539.344	781.925	792.972	270.165	264.922	351.461	186.135	181.425	217.987	86.7776	132.491	157.057	114.608	143.536	132.144	174.796	164.872	111.128
VIT_11s0052g00880	262.274	186.785	198.41	397.899	423.054	388.559	229.616	215.988	225.698	451.385	316.463	241.834	180.468	157.565	135.271	244.436	252.739	294.613
VIT_03s0063g00130	258.905	389.877	305.203	199.028	242.595	196.104	163.827	177.683	137.526	217.01	379.775	382.178	288.952	413.813	471.283	182.505	207.697	174.525
VIT_02s0012g01220	455.858	461.556	486.787	211.112	210.902	206.167	276.542	253.119	241.01	73.323	79.381	171.273	253.282	259.305	241.134	355.558	287.223	263.986
VIT_13s0019g01980	323.008	250.299	287.686	41.8459	52.6993	84.3062	244.153	268.644	254.486	276.818	347.097	489.86	209.779	222.699	271.261	416.23	266.716	472.766
VIT_08s0007g08370	270.972	273.598	269.515	240.985	281.696	222.377	245.75	230.985	200.759	267.07	355.777	327.567	263.604	311.432	384.323	212.047	229.918	191.806
VIT_02s0012g00100	242.274	374.366	383.596	343.965	369.474	361.382	142.747	148.399	132.915	375.861	362.346	347.115	168.344	278.28	351.999	118.455	151.757	125.979
VIT_05s0029g00020	258.255	317.962	310.862	220.341	247.353	251.416	185.785	186.563	167.044	264.649	342.246	371.299	307.777	461.485	445.128	138.812	174.169	127.475
VIT_00s0615g00020	40.318	27.0165	31.0165	26.3094	42.2495	35.1446	1.55063	3.40769	3.65659	964.231	903.429	930.022	262.305	403.656	363.976	272.702	167.477	259.645
VIT_16s0013g01120	210.609	175.049	163.538	132.498	107.315	111.197	316.162	288.25	314.312	136.124	323.04	193.156	232.698	262.985	314.478	566.908	272.305	615.4
VIT_13s0047g01160	248.62	306.748	313.089	284.961	290.385	285.655	251.728	257.981	237.701	298.502	336.353	316.85	210.228	293.57	349.942	133.732	164.459	145.597
VIT_13s0067g00640	292.273	328.193	366.316	290.985	322.483	351.869	148.804	143.79	152.525	210.72	238.46	453.447	274.492	360.652	338.268	138.016	115.614	192.788
VIT_13s0047g00250	234.37	197.592	201.614	305.991	298.806	265.552	326.758	325.968	322.41	347.023	285.661	257.842	249.863	236.765	232.807	192.468	207.022	225.294
VIT_03s0091g01040	141.668	204.924	175.69	329.671	402.494	324.674	63.2795	69.7676	62.2808	532.685	702.08	412.171	176.14	267.249	273.138	150.859	219.526	189.779
VIT_05s0020g04080	317.665	345.369	368.426	218.06	240.046	257.011	132.242	123.415	143.518	315.483	325.176	452.265	193.467	242.787	258.646	255.491	252.753	255.14
VIT_01s0137g00210	909.303	808.11	850.958	101.454	82.0087	167.794	288.152	271.514	255.057	7.15928	6.66	17.3489	213.177	163.447	104.269	204.006	133.675	109.585
VIT_05s0020g01500	318.945	501.388	416.95	299.882	339.893	271.027	180.804	191.074	190.427	183.116	243.593	293.754	196.051	249.238	295.308	180.247	194.476	144.735
VIT_11s0016g05770	98.2051	74.5215	71.2011	180.404	177.178	160.02	295.234	270.264	341.376	89.6389	78.8715	520.323	218.528	318.413	342.75	198.337	270.796	982.646
VIT_17s0000g00340	185.736	123.148	130.901	249.076	258.64	215.87	415.413	343.407	354.411	431.835	240.878	226.766	288.394	192.045	212.562	238.115	225.389	355.723
VIT_07s0005g02160	235.541	324.484	311.024	221.105	241.349	221.5	184.81	176.232	161.084	324.028	398.522	361.785	242.826	348.014	383.845	171.118	203.758	156.737
VIT_08s0007g01510	164.952	156.987	165.755	246.382	331.749	300.575	28.6945	31.9587	32.6314	705.227	677.666	611.093	121.517	185.627	164.357	186.394	299.695	238.837
VIT_06s0004g05680	161.231	184.009	197.231	272.123	269.832	296.687	206.694	186.949	244.351	47.5494	78.5333	407.376	466.328	706.477	561.538	96.9303	117.148	142.694
VIT_02s0025g00480	208.944	189.228	195.865	235.263	314.192	267.799	50.8489	53.4138	48.9422	626.388	639.336	475.851	194.011	254.302	202.021	211.497	277.485	168.728
VIT_18s0166g00190	172.624	162.263	171.28	87.4369	135.091	110.619	119.04	191.68	223.355	341.387	371.75	692.159	202.845	270.493	340.024	368.793	248.336	403.181
VIT_05s0077g00280	304.535	208.907	195.477	341.976	488.734	408.119	445.478	443.536	380.064	177.74	264.405	157.59	66.0495	66.7846	73.8901	168.825	140.32	264.507
VIT_13s0064g01240	231.055	339.324	329.653	265.831	293.633	261.915	156.032	156.627	156.191	281.772	426.168	326.181	210.582	338.422	402.755	130.544	177.084	112.04
VIT_01s0026g00220	47.8753	55.9413	58.9924	113.989	97.3201	95.7241	157.029	160.477	207.574	438.312	288.749	1319.4	248.901	186.862	208.932	75.8397	102.9	717.389
VIT_08s0040g00390	914.289	664.997	803.509	83.8352	70.7595	171.493	261.129	234.155	202.646	9.99279	11.1503	16.1481	223.782	129.632	78.284	342.073	209.397	150.748
VIT_05s0049g00940	125.36	112.678	114.945	165.415	187.095	163.514	271.856	324.606	344.093	364.819	279.777	449.812	296.646	272.882	278.269	234.642	280.683	298.848
VIT_00s0780g00030	63.731	372.225	318.122	234.681	182.385	225.562	67.9141	126.832	168.18	111.81	133.517	60.5318	372.751	798.609	946.126	112.761	187.395	63.8271
VIT_14s0108g00140	225.186	246.392	228.94	335.605	373.166	327.567	210.187	210.112	225.323	244.831	297.058	280.977	226.12	291.725	351.782	138.262	156.428	169.845
VIT_18s0001g02740	608.328	463.653	529.839	31.5312	35.3886	90.1272	146.989	125.078	126.538	160.237	178.55	202.02	92.3184	56.6197	31.4634	725.159	508.003	425.034
VIT_05s0077g01550	36.4633	57.7427	26.036	968.697	1125.07	853.962	406.894	541.667	405.503	13.7914	3.73972	4.71524	17.3641	18.0741	44.6281	0.254363	7.82302	3.0526
VIT_10s0116g01650	32.43	24.8353	33.9695	110.17	183.933	128.908	53.9227	63.3154	58.6957	413.355	307.915	232.003	146.726	180.83	178.62	1255.11	724.782	405.951
VIT_08s0007g03830	143.389	173.197	155.196	252.357	256.228	210.568	202.824	211.46	206.448	300.884	384.157	443.908	267.23	285.819	359.451	181.589	256.987	232.438
VIT_07s0129g00330	224.405	191.008	191.73	234.717	263.96	213.045	577.257	519.906	512.836	77.0911	99.5385	82.5375	138.487	186.185	173.351	317.145	226.054	294.101
VIT_07s0104g01250	276.214	272.513	291.306	260.463	269.321	283.426	340.802	311.496	335.994	56.0012	72.8441	424.999	170.333	205.439	240.338	156.178	173.484	377.751
VIT_08s0040g02230	366.724	428.17	354.528	263.283	308.007	253.93	126.387	126.806	132.222	211.81	307.261	241.274	236.084	233.782	221.986	256.239	281.325	167.985
VIT_10s0003g01520	207.979	302.736	263.801	172.846	182.664	178.97	147.925	150.694	136.898	249.527	399.017	440.487	270.77	407.196	456.846	174.652	219.979	150.276
VIT_03s0038g02520	389.649	349.083	377.242	140.763	121.32	149.671	389.248	419.443	363.334	31.0217	48.661	57.3429	408.595	421.928	427.288	163.429	196.115	58.3684
VIT_11s0016g01950	242.069	206.358	208.248	260.339	352.485	278.058	32.1237	33.4642	32.9154	489.137	522.122	482.9	175.154	275.917	193.781	225.175	276.434	212.187
VIT_06s0061g01300	88.7359	103.23	96.3243	136.052	133.031	131.799	122.237	153.027	129.574	779.972	777.319	433.378	205.647	271.484	270.928	242.016	198.85	223.33
VIT_18s0001g09850	415.346	408.008	373.488	158.489	192.586	202.528	113.733	128.666	110.481	266.991	245.809	264.645	286.627	294.177	260.436	221.491	231.509	290.563
VIT_11s0052g01190	799.64	655.954	672.633	16.1518	18.6307	140.42	71.3713	60.2286	60.2998	240.107	541.14	247.976	192.663	219.553	225.735	120.319	123.193	55.874
VIT_18s0001g00290	312.277	272.185	279.676	179.027	233.03	218.4	55.7456	61.8107	57.4147	433.656	308.299	463.767	236.322	268.118	295.668	199.189	319.285	266.349
VIT_14s0030g01620	230.797	324.681	298.762	175.174	191.65	190.422	167.769	178.671	168.829	294.575	342.746	327.448	278.534	380.096	435.447	144.078	185.002	137.912
VIT_18s0001g09990	86.1828	76.643	100.432	74.2752	76.6476	86.8121	246.146	286.662	286.126	329.326	214.093	346.363	329.405	248.438	332.617	279.947	254.84	791.394
VIT_04s0008g01380	250.838	246.859	248.896	271.156	403.605	358.409	92.4155	93.2702	95.8941	637.946	637.212	368.243	85.8598	125.641	131.148	103.792	143.32	150.773
VIT_10s0003g00140	237.64	182.294	231.051	106.015	112.812	123.364	359.255	384.421	351.539	185.109	379.85	520.824	110.704	173.647	211.208	301.193	157.718	309.61
VIT_13s0019g03170	60.0213	69.2662	59.2047	872.826	1106.44	795.316	45.4238	61.9454	35.9517	57.0815	66.2367	54.6511	105.909	136.106	137.179	282.939	224.384	263.462
VIT_06s0009g03740	418.922	305.528	334.707	57.0313	51.3245	88.3453	730.777	625.071	615	32.5293	32.0874	85.7606	147.105	113.621	73.9249	336.75	212.171	171.492
VIT_06s0061g01600	217.781	330.732	236.295	199.389	241.804	224.162	165.219	163.571	131.841	284.686	399.547	397.844	209.605	335.648	388.3	157.6	190.339	156.162
VIT_11s0052g00450	205.399	174.95	201.871	101.82	141.795	127.934	134.525	166.84	172.601	387.106	324.804	498.556	156.604	185.894	213.531	420.348	315.072	491.664
VIT_09s0002g00640	57.6643	64.702	58.5704	690.13	1004.1	853.164	27.1901	36.3911	18.0572	8.9603	14.8088	22.3994	83.45	142.798	118.321	401.167	408.765	409.816
VIT_09s0002g00610	229.914	237.062	243.947	245.121	283.039	247.467	181.218	179.756	165.891	332.343	353.708	310.337	263.252	311.506	370.593	145.799	169.184	142.331
VIT_09s0002g01460	239.744	301.369	293.407	241.589	266.262	250.708	216.348	207.582	184.697	277.66	314.926	296.95	221.923	289.522	334.025	156.709	170.19	143.181
VIT_06s0004g07940	272.962	379.369	327.624	289.218	305.357	292.165	171.082	169.003	166.747	230.134	309.401	292.729	189.072	302.551	356.395	104.876	134.013	107.647
VIT_16s0050g01510	78.9773	88.9689	86.6367	320.953	393.033	298.118	119.488	134.349	127.078	680.688	554.76	337.132	138.832	170.894	163.881	190.969	284.663	222.468
VIT_07s0141g00710	216.354	328.643	304.85	228.874	231.412	231.531	141.413	155.401	150.867	341.355	445.106	408.002	183.724	268.356	338.115	114.157	161.724	135.784
VIT_18s0122g00500	154.576	171.668	171.045	251.145	319.623	279.48	96.904	102.672	98.5648	496.633	525.15	403.726	176.83	220.444	202.361	234.421	233.345	245.283
VIT_07s0031g01980	1.24326	3.9294	1.25399	901.382	1595.8	986.608	3.93945	4.73502	3.36045	437.446	307.906	84.5725	8.59497	14.0498	10.4312	0.505357	7.3169	4.39696
VIT_12s0028g00320	1032.62	773.566	820.298	66.8556	68.8574	132.061	275.253	251.175	228.195	1.09865	1.58715	2.91704	110.549	99.1928	34.3614	220.783	151.796	101.977
VIT_00s0357g00100	184.242	290.96	246.311	392.373	422.13	315.896	58.2902	61.0482	64.3929	348.327	496.624	170.686	294.792	313.878	298.998	116.087	218.623	75.807
VIT_04s0079g00600	159.79	117.435	128.147	305.059	330.74	291.06	176.499	195.114	216.151	282.792	236.409	187.208	387.674	367.386	311.564	205.942	261.566	193.307
VIT_11s0016g02850	91.3322	79.28	75.757	114.047	111.64	111.791	40.9316	48.3248	40.7638	805.867	789.951	788.087	114.831	190.524	163.139	189.437	218.826	363.686
VIT_04s0008g06220	246.327	356.497	372.262	186.093	217.808	211.297	117.385	127.409	116.825	260.112	293.614	295.505	286.324	407.86	484.048	112.506	136.637	104.124
VIT_09s0002g01150	79.5118	85.6903	71.0987	395.315	476.733	369.16	56.0216	67.3848	64.0988	784.085	893.165	261.226	129.705	157.423	122.141	79.3796	115.432	120.592
VIT_05s0077g01500	389.31	321.273	302.203	176.66	204.379	214.285	85.4488	92.3376	77.6225	277.624	353.788	208.008	190.557	213.705	191.417	413.771	396.436	210.338
VIT_15s0046g01090	332.91	290.418	324.135	110.553	108.529	125.39	291.75	270.928	275.741	184.704	147.26	239.073	235.435	158.977	174.175	315.234	291.491	435.384
VIT_13s0019g02200	120.701	98.3978	103.182	433.264	590.526	446.503	197.063	215.668	212.509	356.305	367.484	131.816	191.092	201.998	189.807	159.226	136.794	152.197
VIT_18s0001g11980	352.775	291.716	302.931	312.242	255.183	268.661	213.805	224.326	220.233	129.146	181.854	143.241	169.756	198.928	152.65	341.137	284.286	258.179
VIT_18s0001g15120	445.069	372.535	381.695	51.9431	70.4962	115.751	131.265	178.019	169.765	158.901	198.33	488.391	143.051	179.643	173.286	404.913	287.511	320.17
VIT_03s0063g01790	26.9272	29.6875	40.6269	22.7857	27.4273	30.5874	37.2667	48.5544	46.2404	279.702	390.864	1191.91	88.9625	168.663	202.649	445.509	214.722	975.808
VIT_02s0033g01330	425.436	611.338	573.271	208.609	256.459	272.63	108.669	116.23	124.795	132.192	155.061	197.154	212.149	269.943	283.238	91.5088	125.852	100.432
VIT_06s0004g00020	119.65	106.137	136.029	34.256	25.8528	55.0678	2.95544	7.09971	9.13679	575.936	740.319	881.228	239.107	339.531	362.935	244.415	168.866	208.675
VIT_02s0236g00100	206.716	351.371	275.266	122.446	148.008	179.417	71.8449	89.23	80.9554	293.07	628.377	379.692	189.171	341.648	270.755	269.911	252.284	100.61
VIT_05s0062g00270	329.114	211.832	291.639	216.337	328.07	344.275	26.9975	47.657	85.6653	484.388	367.577	354.536	125.296	185.293	214.361	236.067	202.889	197.855
VIT_04s0023g00440	288.398	376.114	360.33	311.561	321.876	344.548	188.518	196.986	189.438	173.138	245.069	215.462	150.588	211.555	198.517	143.452	175.415	153.52
VIT_12s0028g03380	234.615	225.327	216.439	215.778	213.348	193.519	203.589	204.553	187.297	280.764	302.89	309.85	275.695	294.997	310.916	169.953	215.843	183.561
VIT_03s0063g00850	261.325	251.72	263.829	240.443	276.921	269.346	121.982	115.141	113.176	404.447	381.763	356.032	213.116	245.713	224.743	145.76	165.732	170.985
VIT_02s0033g01050	221.034	204.193	210.126	192.89	221.702	158.272	77.7376	111.565	95.7111	362.544	404.086	383.124	39.1016	55.6098	51.7752	463.419	390.921	571.528
VIT_14s0006g00350	126.406	150.04	146.33	253.773	267.337	224.988	260.431	282.946	287.314	341.756	316.722	280.485	200.026	182.173	207.904	185.953	254.692	243.806
VIT_13s0064g00880	348.847	476.919	408.726	176.057	217.247	213.478	123.709	134.486	110.815	205.036	289.711	282.298	166.602	287.287	357.986	123.052	160.85	115.879
VIT_17s0000g06590	358.616	309.305	352.766	70.7526	72.5936	112.613	120.518	119.072	110.247	262.711	410.267	381.813	206.816	249.406	278.047	291.67	257.907	230.199
VIT_13s0019g03920	281.408	252.454	255.876	237.349	259.399	230.473	237.184	254.465	241.948	245.37	205.587	232.37	199.846	197.923	239.869	181.531	222.248	211.523
VIT_18s0041g00430	303.064	230.412	215.531	287.595	260.328	267.325	225.913	230.63	247.473	201.746	264.048	213.237	297.094	309.28	245.225	131.165	135.728	115.613
VIT_19s0015g00550	111.186	142.276	136.814	300.268	304.94	301.073	193.588	249.314	192.371	296.73	336.047	176.681	199.763	241.647	281.174	254.652	352.71	109.681
VIT_17s0000g09110	188.865	258.625	250.526	240.593	272.89	248.96	143.173	128.344	119.309	215.181	348.939	383.383	207.785	305.399	360.243	163.491	185.676	155.423
VIT_14s0030g01980	134.293	103.583	115.979	323.757	350.999	344.529	169.654	183.408	187.213	527.89	389.278	257.55	194.872	234.672	233.81	145.799	146.603	126.837
VIT_00s2563g00010	221.735	202.846	198.862	88.102	106.452	109.967	77.6247	95.812	74.7856	419.489	434.739	540.005	197.042	266.67	272.708	146.646	251.027	460.484
VIT_18s0001g10150	21.0319	17.6271	16.577	948.808	1257.59	881.39	128.123	129.641	148.967	171.389	183.474	90.5166	28.6984	47.8378	38.8318	13.4617	14.961	25.2035
VIT_05s0094g00870	170.833	207.067	208.634	219.462	236.003	230.43	170.059	166.613	158.44	336.453	348.126	244.401	271.745	344.756	398.142	144.283	178.585	127.733
VIT_18s0001g06090	0.329869	0.415431	0.0686559	392.307	623.829	349.991	0.560334	0.550888	0.669032	1312.09	810.223	393.655	52.5531	65.2294	35.269	29.7489	45.7468	41.2179
VIT_03s0038g04560	224.541	345.004	290.87	198.599	222.191	219.533	160.361	166.085	138.488	226.28	309.494	290.369	213.888	339.64	427.691	108.225	142.365	126.761
VIT_02s0012g00170	62.6076	53.6735	46.1899	72.4654	62.6577	55.3107	262.067	204.871	226.684	1201.07	654.35	272.601	228.725	146.761	143.287	168.008	171.281	116.216
VIT_14s0066g02190	278.059	225.786	261.983	119.625	175.59	176.32	83.7568	105.853	101.527	312.984	297.589	355.068	156.946	206.108	221.876	364.341	346.387	354.355
VIT_05s0020g03710	91.4792	116.364	116.433	166.399	279.181	236.317	65.1424	86.8835	77.439	403.137	499.129	506.699	158.56	271.21	293.64	283.029	181.54	296.731
VIT_01s0010g03600	356.079	359.985	365.546	137.217	132.25	156.868	112.375	126.066	119.926	127.818	264.534	252.4	150.605	195.633	180.005	385.463	352.085	351.943
VIT_03s0038g00790	263.59	312.581	307.69	248.738	292.746	269.95	155.846	140.596	144.193	203.55	265.249	382.771	186.644	245.45	287.705	127.412	125.674	165.525
VIT_07s0031g01230	207.111	304.92	275.827	225.405	246.776	222.943	178.675	189.62	189.451	234.485	328.164	304.311	196.577	259.072	327.292	135.978	163.806	132.148
VIT_05s0077g01070	201.624	284.763	252.128	252.945	241.134	286.791	172.302	177.55	198.852	135.954	188.678	245.503	293.369	361.309	374.424	149.407	176.239	128.217
VIT_00s1665g00010	188.404	218.05	175.576	312.128	400.118	309.938	178.956	199.116	181.883	180.78	264.797	278.163	146.204	164.687	167.578	227.365	241.828	272.675
VIT_04s0008g06030	132.436	235.005	211.387	186.489	236.247	208.907	82.5106	83.9414	71.8906	321.12	479.997	445.576	218.219	371.986	410.61	118.098	168.478	125.323
VIT_09s0002g01620	159.138	200.121	187.805	197.937	244.22	195.739	202.71	197.549	182.945	287.22	326.201	311.456	246.725	325.497	372.431	139.406	177.621	153.238
VIT_07s0005g01320	216.974	236.376	262.636	25.4826	31.3604	66.2669	151.53	156.748	185.76	133.438	177.466	264.019	280.618	382.122	423.714	421.158	404.31	287.756
VIT_18s0001g09140	405.167	398.928	383.703	136.441	166.767	195.606	506.376	513.155	509.265	19.0073	16.5467	46.622	123.763	169.43	165.5	139.01	118.311	92.3914
VIT_14s0006g03230	170.362	178.122	175.965	361.797	405.141	360.603	150.415	167.248	178.263	266.991	293.737	349.61	155.44	173.541	204.382	127.419	175.654	209.781
VIT_16s0050g01990	452.577	513.664	408.084	126.564	150.82	142.621	188.145	171.364	169.462	114.4	260.516	153.495	243.51	292.307	274.622	150.336	187.406	104.279
VIT_04s0044g01430	200.766	193.787	196.277	95.1916	112.95	129.248	145.921	190.033	179.873	265.281	347.489	489.984	127.357	159.02	183.579	288.365	306.452	487.335
VIT_18s0001g08420	152.49	221.263	180.136	787.215	912.378	736.373	95.4027	89.9747	89.8134	72.1044	95.3345	114.768	100.4	172.658	122.816	46.6731	50.7288	54.6255
VIT_05s0094g00340	16.5039	45.0909	19.673	284.206	220.986	307.722	585.481	801.332	758.243	88.8561	47.3559	69.4019	24.9663	152.497	574.145	5.18937	30.6243	56.7272
VIT_02s0012g01390	213.74	238.832	251.726	165.122	263.646	212.419	130.927	151.042	134.231	395.843	391.3	356.543	144.038	201.935	197.611	257.894	174.362	207.31
VIT_08s0105g00190	34.7841	31.1825	31.9151	15.9852	20.2772	19.1812	34.1217	56.9152	54.9463	508.475	490.721	735.424	194.369	258.683	316.071	481.432	311.557	475.69
VIT_04s0023g02700	512.705	1030.75	873.981	128.4	140.631	254.4	48.7074	38.1192	35.2729	100.683	138.27	170.292	83.6045	103.847	121.627	96.6214	97.8766	74.1189
VIT_11s0016g01440	194.392	183.964	213.255	239.098	280.36	294.234	108.43	113.753	115.665	378.145	348.981	388.533	193.485	203.402	231.489	167.353	184.578	203.814
VIT_14s0081g00060	919.426	1133.64	1053.33	19.6014	15.5406	131.396	77.2131	67.3758	56.0564	8.58752	18.2824	30.5949	131.762	130.431	82.1154	72.7242	58.0138	30.3972
VIT_06s0004g06610	225.656	328.757	309.088	187.896	194.59	222.357	151.515	164.851	150.666	203.099	241.651	375.127	229.537	261.207	321.252	122.016	170.499	170.727
VIT_12s0059g01240	261.241	174.608	183.402	62.2553	62.5253	68.9405	483.558	399.955	408.616	36.7659	44.3579	530.59	22.2352	34.7313	38.5554	172.674	112.294	931.146
VIT_12s0055g01110	908.384	749.927	747.951	44.0983	39.7579	123.225	146.421	126.328	115.042	2.28284	2.64959	5.21053	162.227	93.8563	46.4149	342.431	221.136	128.776
VIT_05s0077g00030	92.3502	85.6355	80.0087	74.8954	91.3189	76.9239	116.892	132.181	117.26	583.347	473.007	362.342	169.86	148.212	124.125	580.971	403.35	290.964
VIT_01s0026g02080	122.392	105.006	114.866	239.073	344.647	280.015	31.7378	37.7919	37.671	552.873	528.013	498.395	104.86	170.444	149.552	150.601	189.567	345.759
VIT_06s0004g04950	178.859	134.187	150.635	50.2404	50.7525	64.9276	265.734	294.24	275.836	125.496	143.188	226.281	194.43	212.078	224.034	602.92	305.16	491.604
VIT_04s0008g04480	75.2589	70.7411	79.8195	911.13	1105.3	794.288	117.83	144.985	122.217	43.5644	40.8596	31.0264	72.9883	75.8857	77.3849	63.74	59.1807	96.1107
VIT_18s0001g10170	164.706	144.199	136.995	170.219	166.291	160.734	191.697	180.65	175.695	308.473	300.581	377.564	206.772	208.498	231.561	251.129	252.777	351.3
VIT_08s0007g01560	33.0938	46.3507	49.5924	94.5502	115.447	91.6947	41.3947	73.2366	54.3672	1335.18	902.476	436.015	69.2909	130.584	148.544	72.9881	182.337	90.0235
VIT_14s0066g01320	189.599	191.284	211.015	362.16	481.241	388.32	217.309	209.773	197.734	175.261	155.972	154.438	177.974	216.629	281.59	98.5371	116.302	135.555
VIT_02s0025g03660	217.696	165.107	190.752	116.764	122.092	144.306	90.2243	97.4525	85.2522	417.704	449.801	354.242	182.04	209.814	208.971	332.62	299.726	265.883
VIT_01s0010g03880	103.565	141.969	114.124	107.4	112.63	107.047	117.135	131.001	138.038	324.872	625.764	641.534	130.059	248.077	240.875	130.041	122.462	399.999
VIT_01s0026g01770	500.083	632.786	595.588	150.144	153.963	188.021	95.3297	107.177	104.773	149.667	182.019	205.857	131.14	156.159	175.469	131.741	144.096	130.44
VIT_17s0000g01250	79.6008	87.0119	85.6673	23.7549	24.5344	32.3774	19.0189	17.2547	18.5877	351.034	310.895	830.687	169.512	281.836	207.413	431.441	450.914	508.525
VIT_11s0118g00670	231.523	311.456	311.317	200.046	220.413	227.678	165.521	169.27	162.215	183.618	264.636	266.158	198.543	310.943	352.575	106.112	140.41	98.7873
VIT_19s0177g00140	374.789	312.805	306.014	85.3883	96.6431	110.412	293.992	286.565	249.575	122.003	132.241	192.21	366.266	299.816	220.548	207.339	128.731	132.272
VIT_18s0001g06290	226.087	262.574	250.283	185.419	201.974	194.756	158.865	145.216	133.688	264.169	350.646	325.44	191.244	268.521	292.163	153.796	168.915	136.778
VIT_17s0000g08070	292.145	228.002	226.333	276.219	290.876	244.056	331.517	293.163	289.538	106.204	99.7701	132.366	251.971	257.905	258.856	113.369	105.738	105.782
VIT_14s0066g02350	301.733	279.846	353.948	31.6551	47.6601	84.598	142.311	162.527	157.478	224.092	362.75	655.491	120.548	164.277	227.21	190.434	133.118	261.652
VIT_07s0005g01450	133.492	159.826	143.243	223.222	283.561	277.377	51.4909	74.0757	81.1594	500.074	522.79	292.143	146.945	233.137	231.08	209.184	173.946	143.724
VIT_11s0016g00670	293.245	328.719	315.692	59.0953	94.2702	119.199	127.82	144.211	119.377	51.9584	77.3142	290.141	183.027	297.867	329.282	398.444	399.853	234.033
VIT_17s0000g06350	936.119	784.212	957.968	26.4787	27.8574	155.799	46.2704	50.4678	39.1438	0.689601	0.863396	1.14677	127.909	114.414	35.353	268.489	186.575	101.601
VIT_18s0166g00250	36.5869	69.1612	54.4185	541.61	332.997	359.192	325.478	562.89	932.856	41.5172	22.0696	16.0867	66.6061	65.1503	88.1717	41.6882	213.73	90.7586
VIT_15s0048g01890	226.697	222.657	231.185	213.854	224.908	208.716	182.792	183.422	188.617	224.859	229.829	305.905	206.063	248.386	253.915	164.327	172.779	167.935
VIT_02s0012g01380	95.6241	115.971	113.007	179.849	197.781	216.792	180.314	190.517	201.029	157.38	262.667	742.693	121.584	217.925	200.402	143.69	152.785	364.349
VIT_08s0007g02300	116.746	116.257	126.977	421.507	494.498	462.025	66.3453	66.7473	74.4639	482.234	381.318	244.848	130.523	154.775	143.653	104.321	132.237	134.405
VIT_14s0066g01210	1108.8	845.305	945.883	4.14834	4.37214	122.985	51.1563	44.9687	34.892	43.9331	58.9854	126.013	24.2102	21.7739	21.4932	168.288	107.425	118.346
VIT_00s0252g00130	179.178	165.662	174.913	277.927	333.457	280.224	137.28	149.965	129.219	293.726	325.672	204.089	206.801	282.095	242.721	146.735	167.889	143.605
VIT_18s0001g03450	186.951	308.282	261.457	302.317	412.353	426.566	85.4413	115.944	105.974	285.31	261.815	215.584	149.398	180.623	205.285	92.705	138.765	104.675
VIT_03s0038g02510	443.468	348.859	363.195	58.9381	56.5742	101.673	166.479	146.315	144.067	218.539	239.279	143.504	196.545	149.034	95.4083	410.419	317.775	232.201
VIT_16s0050g01160	173.813	235.136	206.142	211.527	241.439	204.373	169.401	171.795	153.193	239.004	292.322	297.152	190.201	271.272	321.511	141.393	167.719	142.901
VIT_06s0004g04250	151.752	170.91	175.723	213.296	278.079	214.911	98.0451	105.918	102.515	298.181	470.011	473.898	153.669	173.455	192.361	167.245	133.788	256.061
VIT_14s0108g01590	247.017	241.941	260.964	140.201	165.037	158.379	38.1932	40.527	40.9287	443.607	540.849	313.471	220.416	221.169	204.093	173.886	240.149	137.991
VIT_16s0098g01230	143.705	209.812	195.364	312.672	326.686	307.095	119.859	132.867	130.013	369.601	339.605	245.602	168.631	239.562	274.328	87.5174	130.257	87.0281
VIT_16s0022g02110	220.352	227.744	200.755	141.787	128.969	140.343	165.423	154.722	140.831	269.283	252.503	280.59	288.561	338.179	356.908	156.43	184.038	168.934
VIT_05s0077g01470	339.911	253.309	290.249	53.5952	58.6941	91.8289	130.708	131.349	128.325	252.944	309.84	354.193	185.09	185.329	222.168	293.283	260.548	274.564
VIT_00s0551g00020	230.493	265.64	249.797	172.083	197.278	179.985	144.379	146.2	128.18	228.423	307.764	304.954	215.74	286.358	306.502	141.751	163.342	142.727
VIT_13s0019g00480	143.179	137.069	165.932	29.7105	33.5786	53.1907	129.266	161.053	250.13	227.477	333.695	472.133	191.43	372.02	439.42	224.653	96.6064	348.43
VIT_16s0050g00610	155.115	286.193	265.602	194.568	253.453	232.73	153.809	157.334	131.235	262.589	329.277	334.34	146.334	247.414	318.001	107.411	130.292	100.278
VIT_11s0052g01800	224.569	199.058	193.548	313.696	351.132	275.133	206.983	214.03	216.095	213.469	255.848	49.3253	215.876	206.996	164.999	205.547	172.256	126.817
VIT_16s0050g01230	169.008	297.268	231.763	35.0633	47.6046	74.6519	22.6228	27.0591	22.4035	522.651	715.25	662.92	68.2111	149.8	193.009	145.829	131.001	289.031
VIT_08s0040g00870	199.039	158.359	178.936	155.215	167.477	171.799	203.322	217.177	203.532	262.872	205.956	287.886	133.457	142.248	153.134	279.583	256.585	423.034
VIT_02s0033g01380	17.4022	12.2012	13.7877	17.1531	12.942	19.1304	7.2452	11.507	10.6774	680.891	682.088	997.112	101.042	166.752	169.39	173.92	153.371	551.375
VIT_15s0021g01000	248.15	370.888	289.101	151.991	144.622	169.868	133.112	123.733	111.739	202.028	324.741	294.587	188.583	318.568	390.346	104.476	132.956	96.0672
VIT_04s0008g07340	165.917	144.375	129.944	196.683	218.869	174.551	360.085	370.332	383.62	180.86	196.281	89.8213	148.436	148.579	146.63	297.683	234.585	208.27
VIT_03s0038g04750	139.779	157.675	163.846	309.929	400.258	318.872	76.4568	82.5733	84.81	316.464	343.808	333.655	179.573	236.494	248.505	102.271	157.298	143.008
VIT_08s0007g07010	157.903	246.489	238.65	275.426	327.302	289.319	152.945	146.723	134.608	296.067	295.795	279.994	150.624	195.556	263.443	100.578	128.404	113.013
VIT_19s0014g02890	413.304	360.519	346.011	128.386	123.581	137.34	143.377	118.33	120.648	107.875	135.373	191.119	308.681	310.985	280.445	205.973	186.485	172.784
VIT_08s0040g02280	172.516	167.273	171.671	392.919	592.968	414.978	61.9836	70.2532	68.2142	210.604	159.503	187.46	127.78	147.349	131.643	223.566	327.246	160.671
VIT_18s0001g14860	222.242	281.124	288.817	228.482	231.801	236.849	130.808	142.377	161.05	177.109	246.71	334.432	182.278	233.964	247.145	125.732	144.597	162.563
VIT_05s0102g01180	295.062	260.68	242.844	247.226	262.938	253.383	91.126	90.5588	95.7206	213.1	254.286	191.612	130.469	149.97	114.292	330.173	284.253	266.151
VIT_09s0002g01000	180.123	161.173	156.379	462.167	491.533	380.45	286.449	258.148	281.172	199.66	177.952	87.1452	71.6968	106.954	73.2211	144.532	114.128	135.89
VIT_10s0003g00260	46.8166	41.404	32.9841	717.574	1051.72	734.74	72.9575	85.1725	50.7215	36.6447	38.7866	26.3141	61.8769	79.1685	69.5909	170.341	190.781	246.818
VIT_04s0008g05510	368.37	306.028	367.685	20.6606	22.1978	80.4812	200.9	211.408	193.623	120.12	173.317	348.57	129.945	178.288	201.213	335.808	223.204	271.544
novel.163	258.82	351.647	276.553	216.657	321.328	280.518	64.4398	72.5768	67.5386	146.943	253.934	267.049	165.127	270.95	241.25	131.918	258.184	100.605
VIT_16s0098g00660	242.384	237.065	205.465	266.757	316.077	268.6	159.001	180.045	145.267	203.161	270.451	129.317	159.142	177.126	125.093	236.428	218.911	201.634
VIT_03s0180g00030	105.671	100.07	108.511	202.539	232.825	191.482	97.3724	122.053	112.325	492.11	484.038	436.733	76.9117	123.252	125.328	198.563	233.118	297.694
VIT_05s0020g03140	118.531	92.3114	92.133	352.57	494.956	369.423	49.1418	56.6917	61.5258	593.83	340.957	243.412	63.9858	73.2811	78.0843	236.929	197.434	222.664
VIT_15s0046g02230	195.191	187.483	230.553	346.795	481.043	366.332	217.806	192.16	204.796	135.181	132.232	301.154	49.7207	68.3088	130.163	135.914	111.858	250.984
VIT_10s0003g00300	448.176	302.329	321.556	83.8631	79.1151	96.8609	276.879	241.053	231.232	85.7334	88.5341	83.2931	242.466	176.6	142.81	353.666	269.383	209.464
VIT_07s0031g00660	200.366	244.62	174.304	267.154	273.664	250.3	86.8463	108.765	95.0635	307.389	505.754	211.211	190.888	269.121	224.005	85.216	138.477	99.6697
VIT_14s0060g01170	217.388	370.107	277.871	153.698	182.755	177.772	110.167	121.293	109.558	186.07	281.446	344.522	187.319	258.421	263.56	149.347	194.329	146.361
VIT_04s0023g01580	227.579	183.323	190.792	307.995	378.969	302.081	280.017	270.285	250.15	156.506	154.27	97.9158	159.839	153.547	126.503	181.897	154.695	152.372
VIT_08s0007g06450	574.143	487.7	462.184	80.5401	78.7746	123.966	54.1738	46.8271	31.0862	99.8727	143.197	191.13	267.122	275.678	250.698	221.363	151.373	181.777
VIT_08s0007g07220	207.168	235.056	229.419	184.065	224.313	195.902	204.182	183.503	172.362	205.923	286.985	266.396	171.606	238.213	269.309	137.322	162.422	147.418
VIT_13s0019g00550	192.759	240.185	240.426	185.176	204.68	206.047	140	154.342	164.709	175.5	258.331	413.333	181.253	220.933	238.631	141.918	158.317	200.728
VIT_03s0038g04270	243.025	208.831	218.653	194.432	193.691	188.527	189.285	174.656	172.498	196.536	198.144	240.337	233.428	219.874	220.02	230.706	205.444	186.86
VIT_05s0020g02540	286.563	232.763	248.208	191.072	234.939	223.115	134.021	133.371	121.586	156.549	175.836	258.07	200.592	235.46	206.777	247.765	199.731	222.498
VIT_13s0064g01390	175.639	221.725	224.321	197.821	193.199	196.5	159.489	157.779	159.016	262.234	284.979	229.574	200.576	279.834	329.291	132.871	180.288	120.757
VIT_16s0050g02480	113.27	71.9449	85.3579	146.257	182.19	154.964	142.953	109.162	121.72	559.427	412.824	190.802	102.241	83.7986	89.7297	472.241	308.566	357.956
VIT_16s0100g00640	271.595	240.047	223.01	201.688	255.403	193.21	112.088	105.624	101.551	224.973	361.183	224.357	117.991	128.314	74.1685	337.381	280.833	237.72
VIT_14s0006g02470	218.288	297.433	264.598	214.328	247.783	189.985	146.388	147.843	143.594	158.425	265.114	261.732	176.259	250.36	289.957	130.157	163.189	122.269
VIT_07s0005g02820	308.837	306.57	302.202	211.928	223.075	202.404	236.693	237.354	222.646	127.598	150.884	176.008	172.325	174.549	186.782	145.895	157.913	140.124
VIT_05s0077g01560	16.4298	29.1586	13.5252	903.876	1066.04	835.731	175.163	267.968	160.843	23.38	10.0076	8.65873	30.3017	36.3143	83.5587	1.09665	13.4047	2.28488
VIT_18s0001g05720	196.097	195.486	214.598	218.146	254.163	248.8	150.091	143.745	132.654	186.499	194.301	227.474	234.428	265.84	286.637	187.95	177.058	159.957
VIT_08s0040g03360	153.705	242.759	215.965	247.772	271.462	235.125	147.876	155.796	152.29	178.761	249.224	262.806	234.231	281.374	309.637	99.0471	140.624	90.1568
VIT_18s0001g13250	156.332	189.989	142.279	182.213	269.88	235.336	74.8127	78.1507	58.3482	294.136	588.039	260.541	129.831	210.273	185.6	215.186	201.99	190.76
VIT_12s0035g01940	193.127	464.687	402.184	240.92	257.238	298.734	78.3114	95.0105	95.6913	172.44	215.361	274.018	130.301	194.203	250.433	93.7592	102.678	103.673
VIT_01s0010g03790	162.198	196.985	180.336	257.669	260.152	258.922	161.852	161.758	173.708	193.43	251.161	311.331	188.026	255.864	275.794	105.346	137.412	124.7
VIT_10s0003g01240	274.264	275.672	288.013	252.602	257.677	263.278	150.258	146.635	139.327	141.569	180.567	207.9	231.842	246.981	218.768	140.279	123.497	116.977
VIT_02s0025g01430	43.8618	45.6071	44.2137	170.644	199.049	141.579	17.269	25.2395	25.8171	504.24	535.461	548.676	195.933	229.326	208.483	195.162	332.382	188.263
VIT_17s0000g01540	212.689	240.973	245.951	206.075	210.244	218.206	181.838	178.878	176.273	178.64	236.803	240.195	207.239	236.651	288.157	115.833	142.87	124.061
VIT_08s0058g00670	453.409	371.385	402.938	60.0136	68.7899	122.32	263.804	255.064	220.73	121.918	167.47	159.809	135.977	153.553	167.441	198.732	173.997	139.32
VIT_03s0038g02320	294.107	249.267	261.255	192.483	209.427	192.156	186.731	178.016	163.401	170.515	192.869	180.875	213.471	201.806	173.727	218.512	187.071	165.644
VIT_06s0004g04240	256.611	256.637	254.897	139.815	164.031	143.238	112.528	111.126	108.986	220.001	320.785	395.682	163.707	187.418	195.917	184.879	184.147	230.702
VIT_11s0052g01700	211.186	194.988	201.101	267.919	230.022	236.885	353.081	332.801	388.113	211.027	161.627	167.052	93.8634	91.3126	122.568	118.264	100.324	146.076
VIT_19s0015g01090	119.609	113.864	113.766	359.689	429.344	320.58	214.393	212.353	186.062	159.253	126.722	97.6166	180.812	170.007	178.641	193.707	223.497	217.358
VIT_07s0141g00920	36.2813	28.8582	31.3299	88.8062	120.259	102.48	41.2408	65.632	90.7502	355.311	280.006	413.479	208.39	271.606	236.738	571.731	362.069	305.585
VIT_13s0067g00700	152.718	165.043	181.12	58.1427	63.172	85.4289	73.5678	91.653	85.6391	195.369	242.327	356.806	228.663	312.917	360.623	262.994	310.28	383.99
VIT_06s0004g04280	158.708	188.81	197.948	256.906	278.25	267.427	103.619	113.399	127.644	209.83	256.057	303.897	198.838	247.086	235.246	147.505	174.093	141.954
VIT_08s0007g08260	85.1153	90.8623	81.1663	286.517	343.249	292.162	110.023	133.558	116.23	324.15	408.988	352.745	104.365	114.764	126.162	130.164	168.348	322.217
VIT_14s0060g00600	175.961	172.957	162.331	168.183	166.348	157.574	158.807	158.585	161.437	298.2	256.772	247.638	213.259	195.289	182.117	229.365	235.562	237.785
VIT_06s0009g02410	152.259	187.611	172.521	194.619	200.525	190.801	172.252	183.543	167.674	198.68	214.275	246.532	241.034	298.867	357.59	127.731	154.154	116.274
VIT_19s0140g00210	355.354	338.37	355.574	72.7499	71.7192	86.2371	193.889	193.721	203.348	73.8376	86.881	118.643	137.22	109.935	83.7354	486.913	366.416	242.073
VIT_04s0044g01290	189.798	142.764	151.567	174.651	191.733	185.183	113.81	116.024	116.896	314.134	314.494	282.876	198.905	211.868	201.93	211.975	219.853	238.1
VIT_00s0225g00130	372.1	260.651	264.314	82.6985	81.0736	93.7857	252.174	215.078	175.092	158.154	127.545	69.5472	177.508	101.235	66.9518	504.007	364.583	209.751
VIT_05s0077g02070	192.97	243.825	226.92	201.354	207.516	190.806	142.658	148.606	136.606	184.44	252.557	250.094	200.244	281.72	329.308	123.685	144.02	109.135
VIT_04s0023g03210	247.282	299.228	296.21	182.705	190.212	177.453	190.116	183.618	164.315	123.043	173.317	231.565	168.65	254.002	315.467	116.095	138.314	109.611
VIT_02s0025g02790	266.108	195.18	204.182	35.1911	36.4013	62.7254	116.898	102.564	81.5449	76.5008	100.931	191.007	346.479	228.145	243.54	515.146	323.865	430.439
VIT_06s0004g01790	97.6388	106.143	115.14	140.682	184.762	164.076	58.2968	61.1035	68.6148	462.697	582.423	454.756	119.75	171.905	204.062	193.635	176.147	186.071
VIT_04s0044g00220	299.18	260.417	288.23	72.1586	103.591	136.639	95.4567	112.58	86.1078	475.698	328.188	308.557	45.2444	52.8294	59.996	215.546	290.648	303.025
VIT_05s0020g00490	187.645	210.899	225.978	252.591	270.133	251.571	148.965	143.555	144.037	222.961	257.124	249.956	163.202	197.862	220.169	113.955	145.51	126.692
VIT_12s0059g00880	81.506	84.0596	84.0622	87.8761	123.484	108.572	24.7748	38.7922	44.279	789.266	518.813	482.63	108.905	148.407	199.125	131.484	122.848	347.596
VIT_04s0008g06570	140.148	127.903	150.418	171.758	207.401	202.116	60.9099	62.0103	72.252	210.303	152.007	223.446	244.903	310.727	362.903	188.479	452.437	180.687
VIT_13s0067g02710	138.354	143.198	171.092	14.512	16.7683	33.7902	68.6091	75.2324	72.3377	289.254	337.148	653.13	136.085	210.665	258.657	317.7	204.383	377.571
VIT_19s0093g00510	380.187	273.211	274.744	90.1206	87.816	102.949	250.626	193.237	178.739	129.752	119.926	114.748	207.413	140.879	89.0843	381.74	290.33	210.577
VIT_11s0016g00020	241.576	296.029	305.588	143.976	178.266	207.068	133.237	133.66	155.835	115.866	205.3	310.411	215.262	255.374	261.287	113.525	132.027	111.409
VIT_01s0127g00460	291.535	355.991	358.619	184.617	214.765	224.304	132.366	118.069	134.279	130.451	155.36	278.09	174.24	210.26	187.604	100.033	115.397	146.132
VIT_05s0094g00350	43.4128	85.5793	41.9661	604.908	520.465	432.93	470.926	595.545	511.595	5.65623	2.94068	2.49717	15.6903	37.8834	101.627	1.75915	25.6006	3.37593
VIT_01s0026g01640	139.462	128.218	132.157	284.974	301.733	283.784	102.937	114.243	128.141	268.528	170.148	261.951	244.488	349.462	312.502	61.9978	108.109	111.481
VIT_09s0002g06760	124.284	107.239	109.191	504.506	607.7	434.028	195.448	194.905	206.799	128.067	73.6124	102.587	162.633	107.175	96.6886	94.5876	141.895	111.539
VIT_08s0032g01220	187.604	163.589	188.455	14.6853	19.837	46.3924	20.7584	32.2581	28.8384	211.511	240.919	890.228	100.47	150.732	109.06	386.542	287.221	417.268
VIT_06s0004g06710	179.323	129.04	144.56	92.4135	100.152	107.817	181.355	183.417	185.498	191.078	177.52	239.65	206.112	213.45	215.64	384.678	292.291	270.221
VIT_01s0011g06450	160.404	107.02	147.535	95.1341	115.529	160.964	53.3097	51.4727	66.8798	186.402	148.059	603.727	123.881	128.444	127.23	422.576	253.875	534.192
VIT_16s0050g00410	167.787	197.982	227.069	27.3314	31.8099	46.0004	21.4404	34.681	35.2812	163.176	195.934	754.852	133.7	206.744	228.238	383.199	272.272	350.13
VIT_19s0014g05100	309.285	316.321	303.813	201.037	218.254	226.442	126.854	128.344	132.488	154.362	201.156	208.755	173.311	193.286	188.125	132.85	135.617	121.454
VIT_18s0001g06330	172.811	178.297	154.774	291.214	338.324	243.273	155.434	154.007	153.068	269.163	285.39	203.952	162.219	161.155	178.053	106.373	123.819	134.023
VIT_00s1372g00020	105.375	102.639	90.4959	208.456	276.939	214.403	74.3933	81.7748	80.5174	422.473	444.246	297.737	136.647	152.99	131.864	209.928	206.151	216.975
VIT_01s0010g02930	302.442	398.906	378.068	0.129918	1.13923	43.7577	9.14096	14.9357	15.418	95.9515	238.982	659.393	156.81	287.153	399.556	148.442	151.919	150.47
VIT_05s0020g02990	151.229	228.27	193.511	180.358	216.064	199.108	111.727	105.055	92.4058	235.795	300.665	298.707	192.094	275.446	353.316	104.873	119.477	91.8199
VIT_02s0025g02820	229.074	232.574	226.338	59.0155	71.9341	81.9291	132.501	120.163	118.007	501.085	524.599	454.312	86.9301	105.962	94.7854	146.81	121.515	140.98
VIT_19s0027g00760	138.75	110.13	109.165	181.995	189.341	152.09	265.454	238.585	225.353	236.588	191.447	158.108	233.644	183.036	201.171	230.798	215.301	186.973
VIT_06s0080g00450	164.466	158.051	148.294	61.0965	79.3076	88.5382	60.5954	58.0624	50.68	378.994	576.064	455.059	102.531	171.675	163.53	207.003	253.145	269.041
VIT_18s0001g04640	87.6415	137.999	114.451	83.1977	107.85	113.142	35.1035	50.0139	45.3572	437.706	750.256	613.849	82.6906	148.054	211.383	160.407	150.6	115.788
VIT_04s0023g00740	408.322	392.436	388.795	88.1777	69.8253	97.8849	172.049	160.946	142.324	33.4627	54.849	129.123	204.755	198.449	165.301	306.687	221.753	204.093
VIT_18s0072g00340	207.541	211.608	227.873	167.397	180.839	177.832	176.409	154.331	154.62	217.067	229.966	228.376	193.774	233.817	280.679	123.216	151.794	120.378
VIT_08s0105g00230	110.456	93.5097	98.0119	89.6179	75.8475	86.1048	344.362	350.606	366.072	130.08	92.3295	268.539	191.554	177.583	198.58	183.434	157.611	422.833
VIT_19s0015g01370	183.914	202.293	183.445	441.677	436.733	369.5	193.664	232.291	215.121	172.866	225.844	80.1101	126.224	127.242	71.8058	63.3527	73.7066	34.4859
VIT_06s0004g08200	184.523	192.359	173.862	356.406	410.527	338.947	208.821	227.308	184.97	51.0871	90.3352	104.649	122.121	176.107	184.087	133.965	145.166	146.89
VIT_03s0017g01350	174.017	195.762	221.688	166.588	186.919	171.816	144.856	141.753	136.235	249.438	259.927	260.783	179.362	252.158	313.69	122.212	133.307	121.514
VIT_12s0035g00350	16.3348	17.3135	26.2585	782.771	921.172	762.545	196.27	186.551	220.941	40.2633	79.9466	32.2448	23.9809	38.4652	37.7622	16.6915	21.1057	10.9021
VIT_18s0001g03220	161.864	221.887	183.19	160.822	151.319	157.484	128.173	121.162	118.098	197.372	280.867	373.188	207.597	246.482	281.802	128.257	140.366	170.579
VIT_12s0059g02370	108.737	133.071	119.07	188.536	208.811	191.665	116.883	121.901	124.503	196.734	302.678	430.173	123.108	152.978	206.473	185.322	227.384	288.725
VIT_12s0028g03310	113.131	110.006	102.104	251.336	319.046	250.677	48.7065	56.4585	52.1968	596.809	557.648	287.308	127.55	120.419	100.915	89.7817	136.742	91.1652
VIT_14s0030g01560	190.113	157.273	167.868	191.75	193.418	181.324	242.698	228.726	221.849	177.869	185.319	170.419	195.162	189.505	218.75	175.801	185.874	136.93
VIT_19s0085g01030	162.973	166.728	174.242	274.134	389.883	292.483	53.1544	54.17	54.0286	387.841	258.31	214.798	138.874	163.753	145.353	123.61	224.108	124.588
VIT_13s0067g02700	171.383	248.469	224.933	177.58	189.297	175.656	115.947	120.008	110.743	189.724	289.698	251.952	167.768	239.534	293.894	141.435	154.921	131.638
VIT_02s0033g01000	67.0973	50.9843	54.6816	50.9772	56.6268	43.445	41.6043	68.5846	45.3628	139.326	219.164	398.247	105.641	162.629	173.232	604.608	379.128	727.278
VIT_19s0014g04730	264.97	243.299	244.643	135.291	144.704	145.984	119.015	103.264	100.202	154.868	238.573	293.359	212.461	240.341	190.518	200.342	176.98	178.433
VIT_02s0025g01710	300.007	216.471	239.761	88.268	92.372	93.1501	356.19	362.069	297.291	20.4548	29.365	63.0309	87.4113	42.0067	20.667	500.149	282.787	293.696
VIT_13s0019g03260	116.249	189.511	193.749	169.817	200.95	184.75	119.201	126.24	107.746	259.895	287.926	266.018	175.104	275.718	360.233	102.635	148.216	100.545
VIT_18s0001g04660	102.896	73.0595	107.67	34.9189	25.8132	45.5854	15.4293	22.712	24.7407	144.649	300.673	639.049	208.062	340.02	509.585	324.885	128.599	335.861
VIT_14s0030g01220	188.181	341.546	223.737	126.206	100.9	125.809	160.918	178.747	195.883	45.5609	107.842	370.513	186.487	297.703	345.876	60.5045	111.047	212.054
VIT_11s0206g00120	173.959	190.013	168.562	291.724	285.329	268.998	94.5527	99.5243	89.58	128.648	174.647	220.408	196.098	208.693	176.883	228.347	213.797	163.579
VIT_18s0001g12100	236.648	157.156	180.128	196.162	181.225	171.47	341.508	309.689	298.148	81.1744	64.9848	74.7262	117.932	65.4235	50.1938	394.866	257.44	185.759
VIT_01s0010g00980	232.226	200.545	254.968	327.906	295.981	308.764	119.336	112.666	122.36	178.482	240.904	131.262	143.847	127.909	113.994	163.136	178.189	111.585
VIT_11s0016g04490	330.257	289.603	284.724	104.584	140.026	155.912	87.9264	85.2439	80.3022	141.102	216.665	284.023	133.25	177.339	171.498	251.701	207.965	217.514
VIT_10s0003g00410	90.4558	82.4993	75.8392	33.8943	41.6817	41.4834	24.9501	35.0499	38.8894	560.832	700.024	671.626	73.0475	120.279	141.819	159.38	176.015	286.723
VIT_11s0149g00060	137.089	138.105	133.28	352.22	441.628	351.364	177.844	185.84	177.883	241.183	231.207	164.542	78.7585	101.959	81.0647	107.044	150.543	95.8708
VIT_19s0015g01760	583.598	547.662	549.186	52.6032	55.5524	93.5605	236.531	209.107	184.289	11.8639	15.7446	22.571	161.365	129.159	85.3354	174.18	133.173	98.2334
VIT_14s0060g01290	124.88	152.422	157.39	164.067	177.227	157.456	166.12	184.47	181.992	280.955	184.714	220.703	231.362	200.813	287.783	133.994	177.712	157.107
VIT_13s0067g02190	252.103	260.42	210.046	348.67	366.47	315.039	70.037	72.567	82.002	156.782	263.036	272.692	81.6139	116.679	87.0275	130.487	140.625	114.681
VIT_14s0036g00930	91.4127	88.2711	98.3701	224.602	285.226	253.288	59.9227	63.9446	56.4289	558.871	418.472	225.38	101.766	134.32	112.403	188.841	193.652	185.619
VIT_06s0004g07440	187.081	168.14	159.287	153.359	179.118	157.053	121.477	123.537	126.718	223.948	249.004	266.431	157.747	198.914	201.723	226.807	201.887	237.346
VIT_05s0051g00720	147.045	126.9	125.295	250.944	272.325	230.962	195.602	194.899	215.69	163.33	133.826	282.466	168.572	194.365	234.653	83.1014	116.293	200.21
VIT_01s0146g00280	54.8257	51.7849	54.1991	318.454	479.963	376.146	85.4657	76.9537	119.182	592.914	576.991	200.43	59.1771	65.5242	65.6176	48.5161	34.4207	72.2532
VIT_10s0003g01360	166.333	167.144	165.209	137.668	142.709	133.944	193.899	204.698	224.552	126.972	98.7426	182.469	263.745	238.794	280.399	163.433	182.651	259.148
VIT_07s0005g04150	170.49	255.605	206.567	221.788	236.638	214.403	138.36	162.497	141.758	166.455	246.595	229.507	158.853	232.183	268.894	86.8226	112.739	81.2794
VIT_05s0102g00210	68.7196	62.1667	62.1796	24.1704	26.5788	32.9738	24.8253	35.3843	32.087	343.96	346.292	374.55	228.428	270.034	289.829	428.064	374.544	300.075
VIT_09s0002g05600	79.8013	57.9184	58.6926	77.4665	68.8907	89.3097	103.511	132.097	108.563	526.319	344.423	311.219	278.419	272.001	246.556	139.985	273.522	151.091
VIT_17s0000g02750	141.696	155.817	159.589	210.473	239.498	195.214	192.257	185.537	168.779	219.78	202.945	183.254	181.939	203.363	258.914	125.156	160.569	125.75
VIT_08s0007g05550	226.051	221.059	231.039	240.014	207.657	209.343	83.1342	81.1075	76.7561	228.073	314.856	215.267	115.883	129.032	161.43	239.921	186.743	139.176
VIT_00s0958g00010	101.524	109.12	104.923	380.589	301.896	274.783	196.241	253.805	225.257	360.306	116.295	85.7317	163.087	105.924	111.725	149.843	157.555	105.454
VIT_08s0058g00390	189.528	238.44	218.417	156.246	174.1	166.349	145.019	145.859	130.431	219.188	252.627	224.694	184.491	241.509	290.624	99.0745	125.385	100.996
VIT_08s0007g03130	186.849	274.522	260.474	196.329	204.003	227.096	99.3787	90.2549	99.6164	171.896	211.213	271.072	155.375	270.463	279.651	92.2329	108.589	100.79
VIT_13s0084g00130	56.1339	106.222	108.067	55.7709	50.8087	64.0629	97.7543	122.527	109.683	245.242	318.227	415.933	88.7723	126.938	139.468	435.638	438.525	319.751
VIT_02s0012g01630	116.204	133.444	124.677	242.319	313.035	243.387	23.8119	27.1803	21.3812	539.197	675.313	309.931	91.3493	117.803	103.111	59.2148	83.8215	72.9853
VIT_08s0040g02470	155.798	149.144	144.141	172.936	200.924	169.328	105.179	110.033	114.242	245.439	281.733	282.58	186.025	178.369	170.93	226.948	206.71	194.922
VIT_18s0001g00820	221.083	177.508	183.068	271.936	285.651	224.877	338.467	290.15	297.971	36.1191	20.4624	33.6576	110.299	105.654	60.8552	300.919	203.919	127.206
VIT_03s0038g01340	160.646	254.425	207.363	148.488	165.808	143.037	121.38	132.704	113.225	158.346	254.491	290.977	182.797	247.723	287.274	110.312	163.133	145.275
VIT_16s0098g01010	220.534	356.89	290.025	151.721	164.746	164.927	114.221	122.938	107.613	157.695	266.527	273.733	133.634	230.038	241.048	89.1582	104.125	93.3614
VIT_18s0001g14410	122.474	108.637	106.056	346.061	437.125	374.478	31.7961	39.6066	39.8846	572.553	390.328	189.193	91.7778	133.238	93.8518	43.5057	93.6996	66.1783
VIT_04s0008g03900	198.195	277.156	219.427	120.946	134.497	117.885	82.5507	89.7048	86.0773	121.358	280.954	300.295	218.362	361.126	376.806	83.2239	116.808	94.6855
novel.1182	158.829	189.303	123.51	26.1961	38.106	49.1395	54.4388	58.3339	50.5328	68.2699	261.259	519.166	160.592	295.737	313.691	337.523	256.499	318.556
VIT_03s0017g02260	149.485	145.47	154.984	468.329	425.86	397.46	73.1874	95.6201	126.701	7.31273	21.0503	5.40475	512.037	291.873	211.106	30.1763	118.388	35.1956
VIT_12s0059g01460	108.51	141.971	138.205	262.479	314.121	292.665	88.8355	90.1827	91.9347	389.585	397.656	216.392	105.61	145.288	128.342	128.704	119.1	106.196
VIT_01s0026g01430	168.503	133.944	148.178	55.0852	61.1271	77.2213	116.702	133.333	130.857	175.267	180.506	207.899	162.509	177.768	182.411	442.57	322.318	378.354
VIT_19s0085g00380	394.962	270.699	270.211	26.4489	26.3387	56.1391	155.683	126.724	113.814	74.3252	68.1185	40.5893	140.188	79.009	58.1549	704.98	420.692	216.731
VIT_03s0088g01180	78.4043	83.6622	84.4843	117.78	156.293	130.069	40.47	63.093	58.19	272.359	320.072	459.721	163.498	211.337	232.669	208.301	227.165	329.57
VIT_17s0000g03390	174.835	155.97	159.582	10.6594	10.4155	36.7206	32.353	44.2113	39.0952	217.768	343.773	326.756	186.719	201.806	200.523	383.886	429.763	281.982
VIT_15s0048g02500	627.409	549.507	558.473	30.4172	36.7111	107.947	166.829	128.544	125.401	43.5232	55.2883	46.3895	94.7341	85.0979	51.824	273.23	160.41	91.9485
VIT_08s0007g02200	191.905	183.513	199.907	158.361	171.088	184.134	107.201	109.826	109.722	182.372	218.665	243.024	202.748	246.238	243.168	169.648	175.233	136.412
VIT_12s0059g01310	206.533	324.615	263.699	149.666	169.745	167.714	115.168	121.172	108.009	117.527	227.644	296.655	158.607	219.115	238.633	109.424	127.076	111.449
VIT_01s0010g00990	238.694	237.837	239.148	324.081	361.142	310.41	151.667	133.284	140.428	142.13	188.071	109.779	105.091	99.2527	90.9016	122.941	138.931	85.8716
VIT_03s0038g00490	134.944	118.037	120.234	49.2379	57.7341	70.0603	68.1968	97.7526	81.7667	234.396	317.786	470.756	140.354	202.199	207.243	299.321	257.118	292.042
VIT_12s0134g00060	154.698	175.104	163.035	163.764	181.326	148.334	168.645	155.393	135.808	191.072	251.593	228.231	176.617	222.461	272.29	143.27	144.545	140.992
VIT_19s0015g01190	224.85	252.916	251.894	234.641	217.35	240.077	162.301	164.053	171.305	140.459	139.074	183.464	120.956	151.601	167.164	116.708	126.621	135.142
VIT_19s0014g00160	945.515	638.615	643.995	70.2171	71.9458	121.398	105.687	113.155	93.3076	1.93587	4.8475	1.2877	107.362	62.4614	34.5245	89.1435	56.1692	37.5875
VIT_04s0069g00920	115.976	104.577	124.695	110.248	149.819	118.85	100.025	140.417	123.447	339.497	288.614	341.592	117.102	101.14	122.126	254.356	207.842	336.669
VIT_10s0003g00580	180.007	183.534	222.488	75.4949	92.2809	108.487	48.9212	67.4827	76.2393	209.7	226.416	476.813	130.772	208.901	246.715	219.031	181.446	241.496
VIT_15s0048g02990	137.67	121.084	149.766	32.6575	44.2628	55.2318	64.8383	70.3706	75.6401	176.075	185.495	464.734	157.193	213.97	233.501	368.001	278.122	367.403
VIT_13s0158g00180	55.4844	58.158	49.9775	194.704	220.988	177.487	69.9839	67.9929	69.2196	339.489	454.471	383.269	112.889	160.695	142.81	86.5549	91.6201	453.732
VIT_08s0040g02460	183.6	278.003	234.093	114.974	124.789	127.279	84.4854	85.0944	87.6986	181.342	278.292	297.818	194.986	283.785	324.337	90.5726	126.087	88.4173
VIT_12s0057g00020	212.314	182.705	188.915	114.627	136.635	120.665	200.846	158.129	177.353	90.3743	92.097	313.587	179.951	176.567	170.028	191.39	159.522	309.558
VIT_13s0101g00220	182.376	304.927	176.648	99.3781	74.5098	176.216	65.1505	103.018	106.883	292.962	295.971	222.728	110.286	157.969	108.871	254.773	271.981	169.622
VIT_08s0007g07520	62.2441	50.8741	53.2435	304.921	451.812	378.39	72.2607	67.1286	41.0678	587.067	771.077	88.0389	23.8732	55.7078	97.5047	11.3541	17.8755	35.6943
VIT_12s0057g00520	195.84	191.5	218.311	255.391	334.5	301.823	21.7249	28.4555	23.0734	195.797	197.565	169.203	163.235	239.578	191.535	107.922	244.542	89.032
VIT_18s0001g03580	284.375	353.565	273.448	104.28	125.29	122.895	119.199	103.003	95.5484	106.475	243.879	260.798	157.893	207.491	213.736	139.389	138.518	118.324
VIT_19s0015g00320	152.628	170.299	173.451	72.1366	102.499	107.978	23.4142	26.697	27.1359	355.467	518.216	390.96	90.7083	114.134	129.31	264.882	191.193	254.828
VIT_04s0023g03420	201.896	181.004	177.253	98.668	101.384	124.428	80.0755	87.8815	78.6756	311.073	275.284	300.469	134.738	168.276	131.27	218.08	229.226	264.997
VIT_03s0063g00070	152.736	145.758	136.377	170.085	171.116	149.638	175.4	177.756	151.82	271.38	229.793	199.35	179.996	179.344	203.676	148.493	161.16	154.111
VIT_15s0021g02480	148.393	189.802	163.666	146.553	164.321	159.744	128.117	126.525	119.563	181.476	238.401	285.166	186.719	244.867	283.238	119.908	136.84	133.116
VIT_11s0037g00080	178.045	270.597	275.881	158.84	157.511	181.564	130.345	124.584	113.79	157.284	243.462	240.741	159.891	229.276	283.715	73.6547	97.7785	77.6423
VIT_17s0000g05050	89.4583	76.0298	70.7637	195.611	254.95	169.335	77.0671	75.3725	67.872	337.129	391.291	112.051	205.706	235.648	170.938	260.187	215.94	148.981
VIT_12s0035g00380	53.9362	60.4046	63.7798	303.166	394.449	302.994	39.4433	43.7667	43.8118	544.687	459.576	263.769	127.076	164.574	165.368	29.8662	38.2475	53.9051
VIT_17s0000g00400	137.18	129.441	121.775	194.217	235.37	188.365	88.5437	85.7802	84.8251	294.145	307.233	421.869	111.225	126.016	145.152	114.418	117.962	249.034
VIT_07s0005g03310	176.698	291.106	249.02	283.368	339.643	342.85	184.796	168.071	184.554	102.429	124.933	125.575	63.8566	93.5019	109.121	105.612	102.593	104.741
VIT_14s0108g01610	219.972	187.947	206.338	122.661	116.546	124.69	29.5218	40.8268	37.3942	421.684	388.487	243.804	175.002	158.541	160.631	169.477	222.851	124.944
VIT_07s0129g00180	189.645	149.463	161.354	90.279	120.115	116.623	38.9963	39.8424	34.4916	350.923	285.785	321.241	126.31	131.936	104.653	320.646	285.937	281.092
VIT_12s0028g00930	61.6102	85.066	87.9527	177.715	221.829	198.902	91.5305	108.532	120.45	258.043	303.24	359.968	152.56	227.689	329.529	69.1073	94.979	186.451
VIT_08s0007g05350	296.556	277.121	268.271	80.3771	81.6925	97.8532	357.269	288.611	288.204	17.489	37.181	246.872	59.1428	75.1817	54.8086	227.525	152.577	225.332
VIT_07s0129g00420	113.654	164.86	125.943	126.051	162.317	166.501	28.9942	26.4095	24.4126	267.158	354.106	357.169	148.288	264.145	274.89	146.073	232.85	139.045
VIT_03s0038g01380	88.8819	101.537	78.9851	223.294	244.913	177.233	210.982	210.434	199.4	203.957	220.681	240.454	51.4411	66.5861	102.915	168.354	192.197	325.584
VIT_07s0104g00590	231.678	189.984	193.393	282.84	321.028	251.331	228.809	190.246	189.833	45.9494	54.9392	49.3391	135.444	120.819	102.801	222.765	157.301	138.988
VIT_14s0066g01530	162.908	270.134	239.819	346.662	385.668	385.531	165.247	174.603	179.321	105.099	123.474	174.127	56.5209	94.6657	108.408	31.8553	45.1675	55.7246
VIT_00s0386g00050	419.909	327.172	302.647	115.118	103.76	120.55	325.035	310.393	275.618	16.8725	25.6575	7.70944	233.612	133.472	88.5036	171.649	110.95	14.5513
VIT_08s0032g00900	155.283	218.054	228.846	179.52	178.566	183.239	114.669	137.551	113.972	197.849	237.05	248.588	128.115	184.027	230.646	123.134	136.995	106.503
VIT_00s0181g00080	68.4721	59.2282	70.2057	59.2584	75.5009	76.0863	37.5605	43.6512	40.55	344.095	474.723	430.564	122.718	195.596	184.891	301.481	261.201	243.065
VIT_18s0001g02420	259.837	218.202	250.221	88.4173	119.302	116.723	43.5829	58.1099	57.7338	210.884	157.755	121.32	100.572	104.053	117.624	396.659	372.619	288.935
VIT_03s0063g02250	89.326	81.7351	86.7218	86.031	60.4124	57.0359	218.738	273.835	457.976	16.8706	23.0463	119.802	76.1878	60.5931	64.5331	445.5	321.272	541.59
VIT_11s0016g02720	112.239	118.716	121.256	285.769	392.029	338.731	46.351	48.8143	51.6447	327.852	291.719	246.565	97.1562	124.376	112.69	97.302	110.583	145.187
VIT_07s0005g06490	129.473	155.656	147.783	156.952	185.651	167.273	114.113	106.147	81.7285	261.415	306.612	267.659	173.407	220.224	255.083	103.765	129.629	105.27
VIT_07s0031g03090	42.4677	42.1763	44.9357	198.114	210.93	179.494	56.215	65.4342	54.9453	502.468	364.334	385.63	89.2748	126.644	141.238	126.211	205.236	230.384
VIT_03s0038g04470	143.986	138.348	131.198	187.837	201.007	190.817	114.01	108.419	117.878	281.09	239.752	211.023	174.025	173.038	147.093	165.621	173.01	164.018
VIT_13s0019g00530	135.585	197.238	179.559	190.018	211.855	191.656	128.759	125.511	125.662	178.972	273.255	241.072	124.549	206.208	250.121	87.5036	129.069	84.306
VIT_05s0020g04250	189.87	269.256	248.112	190.718	206.311	219.703	93.5259	95.9695	91.6623	173.395	194.86	223.749	133.529	162.542	181.674	126.336	139.538	119.061
VIT_10s0003g03790	30.2749	72.7174	60.4503	155.78	169.489	133.029	1.97188	4.02324	4.0684	254.603	457.673	664.177	136.986	192.698	226.222	128.474	177.954	187.769
VIT_17s0119g00110	79.3271	92.5792	78.642	177.905	234.823	193.075	87.4096	113.753	93.0945	207.208	198.23	162.864	147.677	201.283	215.294	290.664	309.958	171.07
VIT_15s0046g01560	256.724	209.158	251.364	543.468	623.597	562.06	78.246	90.4299	76.9504	15.6377	9.52874	16.7478	10.793	15.8408	14.6438	49.2364	60.1245	166.743
VIT_10s0003g05450	68.609	67.3253	73.4784	173.593	207.926	218.156	101.012	150.261	136.2	633.611	367.746	172.956	101.528	95.5666	112.833	120.049	176.28	73.467
VIT_08s0007g03770	181.035	189.692	208.332	157.335	188.187	208.831	128.883	114.674	106.921	189.686	209.452	287.231	109.826	146.422	142.835	154.169	158.446	167.712
VIT_01s0011g04310	209.357	181.774	172.555	122.753	121.984	114.771	137.303	148.805	143.173	179.219	318.816	195.099	153.6	144.016	130.218	186.137	154.64	234.808
VIT_03s0017g01940	126.641	131.56	124.719	94.8761	119.924	113.197	96.5381	135.855	125.058	225.17	385.441	196.577	74.1843	119.89	168.076	354.678	237.935	217.48
VIT_08s0007g00780	306.093	400.653	372.714	179.463	191.36	210.592	135.615	109.818	115.283	54.4065	81.1932	164.238	96.234	116.081	106.337	164.499	134.644	108.387
VIT_10s0071g01160	308.312	340.962	402.626	176.409	202.345	191.871	162.115	144.278	143.854	54.9754	63.4335	84.6059	141.373	134.233	127.41	139.08	129.227	95.9509
VIT_12s0035g02180	128.389	113.911	115.094	318.03	319.293	224.946	121.584	125.064	119.534	244.914	179.703	73.5413	244.932	165.453	148.48	134.442	180.715	83.5965
VIT_09s0018g01420	178.919	140.438	146.121	170.373	160.114	140.851	177.01	186.037	183.205	147.57	172.98	215.629	178.566	166.931	175.083	146.578	167.289	187.445
VIT_13s0064g00270	122.314	87.8908	124.371	140.509	145.33	194.333	65.4292	68.7341	87.0074	246.271	212.225	193.396	165.307	185.676	183.609	348.554	220.927	248.569
VIT_19s0085g00850	107.134	90.6822	106.316	121.506	160.733	144.376	46.609	69.9744	68.6639	363.736	285.076	376.476	147.109	146.473	146.453	194.901	201.986	260.906
VIT_17s0000g05530	109.943	97.5901	104.092	255.188	366.028	280.98	44.588	41.9004	48.0958	236.399	225.11	196.165	145.743	143.765	119.285	217.712	212.089	183.915
VIT_00s0186g00020	254.034	299.186	268.057	109.655	108.607	129.923	91.1558	88.756	88.8258	94.7518	159.913	233.335	174.757	220.296	215.002	200.094	146.904	144.296
VIT_18s0001g12520	101.126	88.6859	83.5169	224.874	252.471	204.311	34.6567	39.6969	31.2567	390.32	288.968	227.404	136.091	155.201	142.697	145.057	244.997	235.171
VIT_17s0000g09310	191.182	412.08	412.819	52.1014	43.3556	112.354	134.643	106.255	123.599	142.735	133.856	201.708	161.668	138.217	147.788	250.039	163.602	97.3441
VIT_04s0023g01250	110.057	108.108	94.4436	196.446	242.716	189.005	46.0713	51.2058	50.9741	409.12	582.505	272.298	108.375	125.005	122.393	92.3388	122.694	91.9419
VIT_02s0025g04660	10.0338	15.6035	14.9011	153.731	183.513	133.283	170.675	161.544	196.409	97.9482	154.985	324.124	146.492	221.485	299.547	99.1869	115.485	511.384
VIT_13s0019g01130	231.859	208.471	253.571	117.22	137.335	169.792	276.924	252.644	291.182	223.286	203.716	163.345	73.3357	90.2334	92.5352	63.557	94.7766	66.1532
VIT_07s0031g00160	75.2166	101.062	86.3052	207.548	250.366	212.128	92.0919	104.156	99.1393	340.556	366.857	217.387	147.875	165.229	200.623	98.2811	129.999	110.265
VIT_11s0052g01220	413.237	335.642	317.771	379.164	339.713	294.294	174.94	138.845	165.883	43.6659	48.494	22.4249	58.4469	84.3184	84.7193	44.4568	33.3619	22.6839
VIT_03s0097g00710	159.164	123.71	148.408	45.8481	58.6973	72.3525	61.2776	79.6644	71.6049	302.341	255.699	360.898	132.215	141.078	135.044	322.274	224.836	298.968
VIT_08s0007g02490	300.016	279.766	302.471	61.6051	77.1481	91.5145	107.22	98.2858	98.9539	152.681	164.987	152.751	225.53	203.625	219.257	170.739	159.581	127.794
VIT_03s0091g00640	150.673	276.415	172.08	91.145	106.209	108.412	78.5163	77.7339	73.0454	125.186	334.353	335.811	165.93	282.116	292.015	100.887	124.588	96.3592
VIT_18s0001g11680	251.442	251.245	265.554	29.8828	30.8254	56.6674	26.1156	43.0966	39.7791	386.932	669.065	252.621	103.625	86.9816	97.068	123.247	179.393	97.1423
VIT_04s0008g05020	144.746	154.77	146.583	76.6987	75.1699	76.7377	167.627	149.042	167.44	135.63	255.144	363.085	185.256	212.582	263.539	115.815	143.292	154.669
VIT_02s0025g00710	219.082	187.404	181.319	187.443	204.468	193.587	91.8309	103.614	87.7724	115.541	160.258	274.765	91.5059	135.597	120.497	211.795	189.831	228.402
VIT_19s0014g00290	55.4015	55.8481	49.1515	160.379	176.479	145.394	59.4433	62.3311	59.2541	623.66	422.801	276.739	119.188	100.013	106.306	125.98	195.985	185.318
VIT_05s0049g01180	157.847	134.504	146.76	279.231	326.406	243.632	78.5797	74.8963	72.9811	162.011	157.291	120.332	189.278	143.314	125.455	205.672	235.07	125.39
VIT_03s0017g01060	244.279	449.171	368.5	169.897	177.157	212.951	60.5617	59.7694	68.6515	99.8199	155.881	216.245	113.66	202.396	202.065	51.208	66.5519	55.0139
VIT_19s0014g03660	729.784	614.273	668.764	12.5309	16.1058	76.5343	29.9687	25.2994	19.2981	2.59755	3.43088	5.15446	43.4474	36.8137	17.2452	342.738	203.596	122.668
VIT_19s0014g03130	131.276	114.565	115.827	480.976	438.93	381.202	335.094	351.136	334.976	9.12487	10.4438	19.469	26.7045	66.9846	142.41	1.31892	4.45756	2.51243
VIT_11s0052g01200	536.616	410.98	444.205	45.3054	36.8733	122.568	42.0292	19.6089	25.4295	129.435	247.661	48.077	211.699	239.85	264.496	63.6588	66.729	9.72915
VIT_08s0007g02450	202.255	207.055	210.143	126.971	117.826	112.155	78.3914	80.7644	43.4938	26.0756	20.8245	4.89487	472.053	347.745	473.6	146.993	171.66	120.709
VIT_06s0004g04960	171.996	125.733	145.337	56.2626	67.2338	77.7377	192.167	197.787	185.868	154.236	169.365	249.85	113.811	122.699	145.357	294.883	193.815	298.736
VIT_04s0044g01880	42.5767	45.8216	47.8584	67.228	80.4478	72.3278	5.80163	6.44978	5.14487	794.936	816.055	344.882	57.5244	129.535	127.391	66.1285	112.754	139.382
VIT_05s0077g02350	131.937	208.093	222.951	74.1019	63.3789	102.746	59.8724	80.6069	63.6666	261.586	371.787	438.888	101.625	158.265	194.706	131.037	188.985	102.739
VIT_16s0039g02020	282.943	198.657	212.492	74.6251	82.3553	97.684	35.2454	41.4689	40.74	237.581	234.033	194.951	198.716	178.417	172.466	256.128	257.529	160.217
VIT_14s0108g01600	212.138	199.415	186.031	82.3057	83.3304	80.4145	35.8628	35.5403	34.9923	281.138	391.664	240.082	187.584	163.532	174.807	164.756	252.026	137.456
VIT_19s0090g01490	214.341	146.287	138.035	282.735	268.798	209.156	44.5128	41.547	44.8434	302.757	324.142	90.2941	136.303	123.971	85.7905	192.018	187.758	109.166
VIT_16s0022g00960	37.0347	126.569	119.087	204.047	277.146	226.445	19.3	29.4461	27.6264	383.405	520.285	168.22	114.563	112.052	293.754	27.3154	183.806	72.1441
VIT_08s0040g00520	172.563	188.896	178.825	156.075	187.176	167.953	110.01	103.475	113.229	170.289	229.416	198.918	158.157	193.423	179.952	142.718	164.671	124.084
VIT_08s0007g06060	5.55233	22.6797	6.7512	228.33	137.61	145.369	613.379	895.07	690.869	3.35986	1.93108	0.583111	9.5174	8.4158	28.4112	19.4054	108.185	5.25068
VIT_03s0038g01650	10.9369	7.05857	7.66003	31.167	35.1681	30.8387	25.3883	30.1149	25.9061	297.266	179.544	226.032	170.146	223.457	182.715	573.423	560.828	312.752
VIT_11s0037g00070	422.514	308.031	346.887	36.4908	40.8673	72.0623	96.199	86.3728	74.2814	24.6569	31.6625	21.2222	88.6974	44.7103	30.5398	563.631	438.533	203.026
VIT_07s0031g00080	126.245	119.96	121.438	176.969	240.625	191.705	60.6608	72.8322	71.1587	262.518	272.141	188.3	146.01	158.915	137.826	207.149	196.219	175.637
VIT_13s0158g00340	78.2148	81.4269	66.1358	446.521	592.473	453.672	7.86503	8.66733	9.60793	369.515	394.73	143.304	40.8126	78.2252	48.4002	30.4439	47.2417	26.7481
VIT_16s0098g01150	17.3511	31.8094	32.2959	46.2185	49.3594	54.6665	7.21293	8.15576	12.2946	443.379	654.919	401.603	142.58	204.648	182.007	272.12	199.157	158.859
VIT_01s0011g03430	26.0205	45.0162	39.11	216.845	210.019	212.862	7.59448	17.1553	14.0368	398.459	615.251	209.047	105.65	216.57	173.17	156.87	208.723	40.2603
VIT_08s0007g06890	160.156	229.876	208.915	151.873	163.484	165.826	122.72	124.719	107.227	137.075	215.247	212.852	159.094	233.831	269.802	83.2931	103.79	60.7933
VIT_05s0049g00400	116.108	105.283	102.934	308.418	336.425	280.857	141.229	158.619	195.845	106.886	117.34	49.023	139.79	166.408	133.662	173.942	172.373	103.515
VIT_09s0018g01930	172.969	283.448	203.833	120	136.583	135.614	77.7853	82.4913	78.7856	111.339	247.365	281.512	168.466	241.884	258.072	90.6629	122.842	93.8476
VIT_05s0077g00730	40.4586	49.0361	45.2561	240.729	332.812	256.153	17.4663	20.6825	22.9692	569.103	532.689	309.81	80.4721	95.5527	77.3055	60.3885	63.6189	89.3741
VIT_06s0009g03540	216.565	255.785	222.364	37.0658	54.546	77.9582	34.758	42.2414	27.4321	273.205	470.326	522.886	81.8541	115.636	142.541	102.332	107.315	117.344
VIT_05s0020g02430	108.752	107.36	116.134	163.748	178.777	159.901	69.8259	75.6324	75.2403	404.598	373.995	255.843	142.882	162.942	177.419	86.6475	128.303	112.257
VIT_00s0179g00150	7.58597	7.19129	6.94992	679.174	994.844	620.641	6.39612	9.68243	4.85908	17.986	19.9826	7.35584	33.0251	54.9862	27.4804	148.391	126.603	124.961
VIT_19s0138g00140	100.929	77.4923	86.5613	335.245	484.402	345.73	30.7777	41.5547	42.1964	222.663	137.967	164.935	102.045	131.887	101.945	118.47	196.26	170.421
VIT_01s0026g01880	190.264	170.607	163.48	84.1598	85.8232	104.417	46.7468	51.6881	46.8868	194.328	225.328	249.579	154.63	189.362	156.545	279.067	263.388	234.5
VIT_18s0001g07690	153.122	149.462	176.956	150.972	195.787	178.664	47.8008	56.512	52.1107	295.283	298.37	404.095	108.399	142.184	127.069	110.81	128.295	114.894
VIT_02s0025g00310	143.452	179.962	168.534	158.046	174.499	148.465	116.872	115.243	107.464	207.955	242.194	223.062	151.36	188.45	231.15	102.171	126.529	103.884
VIT_10s0003g04180	187.606	125.355	144.792	372.105	446.801	309.459	62.8859	58.8169	67.0085	88.1626	72.0828	79.8576	171.896	155.927	98.852	167.709	181.761	93.5136
VIT_01s0011g02860	268.263	221.831	260.106	156.465	137.638	157.793	274.289	242.518	212.998	49.0734	42.035	73.69	92.6746	63.0491	52.2692	246.66	176.153	152.275
VIT_15s0046g00320	165.846	151.515	147.438	155.371	169.702	152.22	39.8094	40.594	35.5033	433.568	430.419	262.735	98.7084	120.95	108.136	120.121	122.603	123.243
VIT_18s0001g06310	189.418	172.862	161.067	225.623	270.938	217.574	74.0226	72.5249	81.2634	231.341	297.421	156.621	100.878	129.777	120.739	119.984	109.511	146.676
VIT_07s0104g00930	106.008	105.684	102.47	301.104	324.321	246.598	143.341	149.544	139.169	140.874	176.88	146.758	148.88	155.667	145.531	97.2299	94.4246	147.653
VIT_00s0532g00030	283.075	373.014	342.063	155.954	124.95	186.469	134.479	121.592	123.145	20.4991	38.3238	136.12	183.003	252.371	191.583	74.5622	61.5636	68.4974
VIT_09s0002g04440	124.632	238.688	187.695	147.698	192.875	161.627	110.15	112.427	91.5902	188.535	248.571	231.11	122.112	187.413	258.197	86.8131	104.816	75.4864
VIT_09s0002g01760	214.315	174.945	182.355	180.089	186.395	172.218	136.716	134.473	145.865	162.236	160.329	160.498	169.598	162.906	144.973	125.587	124.594	129.052
VIT_16s0039g01100	14.4023	22.786	20.2818	38.8	38.7922	36.3625	3.14545	6.77606	5.84471	639.847	536.723	615.767	107.638	158.745	185.786	78.4969	122.125	232.9
VIT_11s0118g00800	221.278	185.957	188.907	161.75	159.246	162.376	172.44	159.472	164.846	135.147	154.878	80.9217	157.59	160.079	157.459	180.09	147.598	114.735
VIT_16s0050g00850	108.653	100.638	110.382	150.348	140.576	121.203	149.865	151.202	156.034	173.63	106.452	101.485	201.57	205.278	238.456	235.752	246.77	165.169
VIT_08s0007g06150	140.897	185.903	201.968	226.844	267.251	246.445	104.55	98.8249	104.132	193.723	200.166	183.859	127.306	169.651	188.994	66.9572	76.2537	77.4864
VIT_10s0003g01600	116.826	120.572	121.017	209.605	248.035	199.407	91.0963	110.908	106.269	330.701	377.657	161.464	120.353	145.38	127.905	92.852	97.3516	82.791
VIT_11s0016g04780	124.063	120.302	122.745	112.061	126.745	105.21	121.271	105.16	108.555	247.832	329.38	412.58	156.366	187.006	200.427	71.2313	81.5059	124.316
VIT_12s0057g00010	91.7594	77.3752	72.1948	83.4695	103.774	93.4431	16.3466	18.8335	18.581	629.068	451.947	391.036	73.3446	109.826	97.1102	141.975	141.826	242.956
VIT_19s0014g01710	37.4078	35.8625	33.4055	284.401	429.562	276.225	13.5054	15.5716	16.209	358.38	210.197	224.058	109.484	114.922	95.6042	207.741	200.72	191.014
VIT_06s0004g02380	164.329	193.904	182.465	172.269	187.705	166.294	158.226	183.182	168.028	162.574	144.1	148.534	130.513	186.817	297.845	48.4362	87.337	63.8318
VIT_01s0026g01080	108.136	127.153	122.369	170.484	210.304	170.426	83.4442	94.7835	82.6985	268.412	324.13	291.812	117.696	134.873	143.372	118.628	129.444	147.974
VIT_11s0103g00630	192.906	312.626	309.127	168.938	163.056	176.418	93.2672	118.664	111.501	145.039	174.939	162.722	114.611	148.527	191.047	76.5537	92.2158	88.4765
VIT_09s0002g03450	38.6908	37.3404	52.8481	167.287	196.103	145.407	301.515	219.656	235.566	56.7744	61.1025	547.335	80.427	118.722	154.979	32.3037	57.225	336.048
VIT_17s0000g04150	41.8406	46.36	50.0155	48.7044	47.8519	45.9672	71.1087	95.2893	91.6798	204.639	217.69	204.558	114.11	137.181	127.042	436.684	435.181	418.278
VIT_01s0146g00250	207.555	181.694	180.165	165.04	230.772	199.969	63.1992	65.2743	66.8511	403.752	281.783	102.133	115.75	101.763	86.184	135.759	133.223	108.233
VIT_00s2349g00010	102.557	120.596	99.5358	178.78	207.712	156.912	98.1207	119.228	113.055	327.416	354.714	387.337	62.778	92.488	126.176	30.1123	72.9476	176.301
VIT_05s0094g01520	154.738	167.574	166.676	85.3761	82.3673	98.0231	88.0085	79.0794	85.1272	204.609	221.267	420.583	169.973	178.918	207.414	100.397	126.185	188.448
VIT_18s0001g01090	204.338	224.499	202.133	133.359	158.284	159.57	119.881	113.951	103.535	159.777	194.979	215.984	143.054	192.426	198.4	91.9291	102.754	104.29
VIT_18s0001g11890	180.473	191.936	173.432	161.413	183.568	157.466	49.0604	53.1262	53.5214	215.405	399.685	277.404	104.925	139.189	120.891	121.275	128.407	108.07
VIT_13s0067g00710	124.834	167.313	170.147	159.931	165.897	160.516	130.476	119.421	111.499	191.915	213.222	238.582	150.709	209.758	242.122	73.768	98.9723	89.5124
VIT_08s0007g08410	29.8385	36.4385	34.4366	253.875	399.249	290.593	18.9302	25.9696	21.3333	650.994	554.651	233.3	45.1968	56.3663	53.5221	26.2333	46.7539	40.4463
VIT_18s0041g02080	77.4139	60.0409	63.447	133.898	162.803	192.545	17.2495	24.2527	30.1313	476.7	414.779	279.231	102.431	165.766	162.208	163.118	120.772	171.308
VIT_14s0083g00970	146.227	161.08	179.574	150.444	174.568	165.183	130.195	126.436	111.508	205.354	219.596	190.362	133.245	195.386	237.337	85.7514	105.254	83.3426
VIT_16s0050g01400	54.6041	52.8	59.9434	5.5626	7.1134	13.4709	6.67441	6.51812	6.06314	157.116	228.67	502.695	200.796	295.924	331.206	344.535	267.865	258.936
VIT_17s0000g03310	129.054	92.6743	103.301	199.815	218.373	175.006	172.604	165.575	143.957	183.558	128.058	111.689	162.588	122.662	127.992	201.011	173.104	188.131
VIT_11s0016g04190	204.505	152.753	136.926	129.135	133.885	111.14	77.9718	80.774	87.252	241.718	259.863	24.6557	272.812	182.324	145.507	237.552	270.213	49.4221
VIT_18s0072g00260	1.19681	3.49104	4.3518	281.972	455.622	289.85	1.52473	1.64945	1.60633	697.305	698.352	295.27	4.78884	18.247	26.5344	1.26484	4.92858	8.63137
VIT_14s0060g01730	122.47	125.645	109.112	50.4507	64.7335	67.4007	285.163	286.904	270.315	26.2645	63.6844	174.101	232.297	312.518	295.838	107.126	106.791	93.7795
VIT_11s0016g01820	210.255	215.299	233.961	134.428	135.438	141.411	80.4545	80.3541	70.3736	263.569	268.962	294.378	75.9195	95.627	87.7737	136.656	125.743	137.227
VIT_14s0066g01340	175.114	209.2	210.961	183.726	203.884	196.738	139.343	143.441	140.898	161.374	163.965	154.013	119.209	134.401	145.441	95.6044	102.664	107.293
VIT_15s0046g00270	143.914	249.729	187.189	134.723	165.267	168.573	82.1411	92.2188	102.728	103.935	197.369	277.167	145.059	238.127	245.084	77.6171	99.5295	76.4023
VIT_13s0019g03000	31.3399	29.8919	25.2519	276.305	291.298	251.161	17.8105	24.5845	16.6852	45.1263	65.9321	117.129	148.328	230.454	211.566	297.605	213.949	490.446
VIT_14s0108g00630	22.6117	59.0018	40.5573	300.502	479.06	280.719	20.7691	32.9152	25.3942	301.122	326.712	281.806	13.8293	44.6574	71.683	51.7285	79.3652	350.987
VIT_04s0008g05000	131.233	190.667	173.106	252.495	284.367	255.397	84.9325	96.0221	82.0355	143.745	174.096	182.526	111.862	143.422	147.967	108.778	114.919	103.066
VIT_06s0061g00750	307.093	317.703	323.528	63.6771	83.2886	93.4447	52.6422	50.5621	36.7405	135.438	152.693	151.542	188.349	203.911	210.428	172.674	145.448	85.7025
VIT_18s0001g11130	27.1275	28.4924	29.6152	230.664	228.412	221.437	21.0051	30.9828	28.9763	519.023	482.719	239.884	117.868	179.907	208.113	49.7873	80.5357	46.0378
VIT_04s0008g02390	80.7502	62.1463	67.1448	267.509	363.632	283.174	48.9915	49.4686	48.5732	404.25	366.901	150.435	49.2995	67.8643	53.7054	125.81	141.477	133.994
VIT_16s0039g01870	176.67	163.408	176.61	12.9229	12.7747	37.0117	32.7578	33.528	53.4087	264.322	245.785	482.968	97.9217	144.505	158.219	190.321	150.303	330.258
VIT_16s0098g00600	28.8327	36.0635	43.1332	97.1264	156.554	127.749	23.569	40.0212	35.6554	180.221	370.444	235.2	100.123	202.25	218.721	445.218	282.158	140.409
VIT_14s0068g00230	117.463	214.776	132.437	348.096	444.165	278.924	32.9665	32.3357	32.0782	158.127	306.874	98.5738	109.954	104.803	106.509	80.3195	120.329	41.6704
VIT_01s0127g00560	42.1583	57.6145	69.3836	265.722	182.75	162.915	382.429	379.475	340.742	176.836	125.737	38.1999	22.5049	49.5121	62.5382	78.5116	303.923	17.8421
VIT_18s0001g06030	120.472	97.9308	94.4602	71.5642	72.1938	66.6158	28.0609	37.8105	30.7491	190.999	313.046	336.706	208.386	274.319	304.167	180.385	204.614	125.55
VIT_06s0004g07150	156.197	175.564	177.717	174.164	183.927	167.748	140.758	133.941	118.315	203.347	206.874	168.76	127.635	157.246	201.107	80.9932	96.2834	82.4773
VIT_05s0102g01220	148.887	264.13	220.597	127.465	158.203	150.76	82.4328	83.732	74.3798	154.449	248.555	232.229	122.945	207.308	245.741	70.8667	92.8127	66.613
VIT_15s0021g02090	65.7736	71.2917	77.2921	192.137	236.203	205.06	95.8639	94.2422	91.8729	406.234	288.407	206.8	125.482	134.514	127.596	96.8614	115.232	116.731
VIT_01s0011g03200	244.065	260.558	233.994	151.636	155.626	140.681	122.132	129.255	132.179	95.2362	157.499	197.447	116.225	139.716	152.497	95.2149	115.491	107.526
VIT_03s0038g01820	128.674	137.742	137.391	179.245	218.543	166.441	110.494	111.745	113.454	187.73	244.604	205.902	141.417	148.067	184.629	99.0272	114.88	114.647
VIT_17s0000g09500	121.638	106.001	100.773	259.936	329.071	263.477	138.413	133.649	125.842	230.944	246.945	101.286	84.8026	92.9452	74.8497	117.121	105.557	106.42
VIT_05s0102g00130	109.103	153.341	107.477	331.589	430.8	353.517	82.6599	87.5195	87.5224	213.331	234.463	51.6686	112.225	113.939	122.274	38.6653	53.3079	54.0729
VIT_19s0085g00370	195.981	183.524	172.12	77.3977	77.7625	72.5382	151.989	147.385	135.715	176.08	168.113	174.505	181.866	160.815	193.04	165.098	158.447	129.49
VIT_10s0003g01480	123.419	158.912	143.421	174.183	183.642	169.599	106.56	94.4862	110.222	170.666	231.949	150.916	211.951	207.917	188.125	93.9005	121.164	79.8944
VIT_01s0026g00820	38.1191	69.6832	52.9281	64.0899	68.5542	59.572	5.28262	10.1089	8.91777	519.854	648.596	579.949	42.1434	92.9392	124.121	63.2816	83.3498	187.647
VIT_19s0015g00690	107.51	175.642	141.993	173.597	175.328	183.487	60.5903	81.5196	86.1477	167.976	274.737	283.609	140.928	203.066	214.431	66.6319	97.0427	83.9706
VIT_01s0011g06250	198.807	161.67	174.613	73.7853	72.6998	79.4691	230.907	216.021	221.515	75.0468	85.3639	111.753	201.039	187.003	169.052	199.591	143.028	114.089
VIT_06s0004g08460	178.361	191.821	213.309	133.204	134.037	161.968	99.5238	101.083	105.907	133.739	157.433	212.791	157.019	196.368	196.621	118.362	119.927	103.499
VIT_14s0060g01390	99.3655	111.947	124.88	209.21	227.752	197.362	109.56	114.181	101.069	200.139	168.859	174.765	170.397	152.529	219.324	93.4685	128.71	108.818
VIT_16s0013g00520	118.689	127.52	131.471	178.502	202.326	168.357	114.954	122.26	112.912	226.738	191.747	210.734	121.186	130.172	149.636	106.997	135.813	159.642
VIT_04s0044g00710	184.837	150.768	149.596	60.1167	56.7622	70.2718	147.181	143.367	128.422	157.132	189.919	208.522	151.808	121.398	122.322	253.856	210.83	199.415
VIT_18s0001g05780	188.356	144.049	159.57	235.348	235.479	210.364	171.124	166.921	190.036	97.1108	76.3967	114.252	97.4221	100.347	85.4943	136.555	132.948	163.218
VIT_18s0041g00720	133.439	110.812	139.236	131.948	187.222	119.314	159.351	132.625	125.056	194.805	251.914	231.01	98.9464	119.814	130.965	144.336	147.336	146.714
VIT_09s0002g00590	87.6884	69.3353	65.0601	241.057	258.33	198.795	122.966	101.282	115.409	279.287	267.294	116.275	90.1535	76.3035	63.1215	203.802	169.156	177.589
VIT_01s0026g02410	135.242	205.671	175.782	113.367	135.905	132.65	104.986	116.957	99.8616	134.245	224.251	230.237	136.298	190.162	222.757	117.198	128.553	97.3082
VIT_18s0001g02650	140.202	146.05	124.094	108.62	116.176	100.329	101.123	105.079	102.407	136.094	242.595	314.196	149.119	192.067	186.451	126.876	142.693	163.204
VIT_18s0001g01180	64.5033	56.0806	47.4309	162.237	212.768	179.872	55.9664	56.6432	58.298	603.787	479.255	218.664	71.4745	92.1466	72.4629	76.244	94.0366	94.7359
VIT_14s0060g01930	133.557	167.544	163.861	146.806	181.428	155.766	120.56	122.189	106.705	153.617	196.843	203.252	148.084	218.308	240.465	79.6617	87.0365	70.7998
VIT_03s0132g00340	86.861	88.4427	88.7987	4.36947	5.93558	22.6089	8.81423	19.7357	14.833	224.708	189.096	229.23	170.747	232.615	276.95	328.909	335.849	367.264
VIT_10s0003g04270	125.526	145.224	135.653	200.889	216.015	188.353	24.8456	24.4997	24.0394	218.05	231.554	115.79	328.585	216.738	156.213	135.862	129.997	75.847
VIT_12s0059g01060	23.9363	58.3904	49.9012	262.881	302.413	233.383	15.7374	23.9029	14.5942	573.888	292.748	89.4963	151.472	189.78	314.809	16.6904	37.722	39.3075
VIT_01s0010g03750	141.546	239.115	189.588	326.105	363.745	333.248	76.2782	102.585	90.678	73.2128	107.758	98.5144	92.1896	144.654	154.376	42.3614	61.3869	49.9034
VIT_19s0093g00110	42.68	43.0652	39.2512	101.099	92.0022	127.457	1.67417	3.10667	3.51986	468.395	508.323	277.784	116.171	258.061	234.457	140.843	119.054	108.517
VIT_04s0008g02860	116.984	106.267	116.991	115.622	159.264	136.136	13.834	14.3055	15.8504	181.05	259.443	195.302	98.2338	148.915	96.3466	466.204	315.712	128.261
VIT_14s0060g01470	156.085	141.189	139.071	27.1157	26.0792	49.085	19.2377	27.1506	24.8028	324.827	398.154	237.257	125.403	139.011	106.889	279.073	272.925	190.931
VIT_00s0399g00020	149.386	227.143	192.955	432.052	522.997	405.292	87.6169	179.147	173.576	2.43323	6.62624	9.767	49.3059	36.0667	40.76	56.4248	87.9371	24.4686
VIT_04s0023g00670	109.238	114.497	108.053	175.696	186.048	153.274	115.939	127.377	116.63	154.321	201.992	196.842	152.663	144.165	157.989	136.231	159.216	168.892
VIT_04s0008g00490	129.512	165.671	144.401	104.407	89.6139	94.7106	119.488	119.662	116.792	117.361	216.872	293.546	140.969	171.02	195.707	129.892	160.308	167.262
VIT_09s0002g05950	190.404	162.486	161.563	121.619	136.39	112.353	188.37	173.37	165.512	87.6473	115.277	117.487	120.87	117.552	100.742	240.683	194.322	168.13
VIT_12s0059g00810	112.426	102.987	105.478	176.069	225.612	190.431	52.0649	56.1691	53.162	191.626	264.264	254.592	128.338	161.25	147.997	113.081	188.286	149.916
VIT_09s0070g00380	77.5667	93.8685	76.814	374.731	487.874	425.338	34.1042	35.4477	35.4802	295.049	321.835	112.542	36.1725	54.5978	45.9807	44.9482	61.1217	58.2184
VIT_09s0070g00490	37.094	43.0161	33.3762	281.888	340.356	276.848	34.8194	36.9664	33.4244	580.728	522.119	181.282	40.0252	56.5904	48.7141	27.3738	37.4412	58.9218
VIT_04s0008g03770	158.083	101.432	114.287	125.695	169.644	169.679	64.9186	68.7148	78.2976	165.245	176.668	243.398	103.32	190.27	177.796	221.437	123.252	217.644
VIT_02s0025g03280	111.037	86.0332	82.9061	164.483	167.587	135.178	204.815	180.045	195.904	175.909	117.756	137.241	186.027	155.88	154.221	139.434	139.85	134.129
VIT_14s0108g01110	97.0559	86.5665	91.8659	303.629	359.517	249.96	112.525	112.014	105.351	195.856	209.766	132.149	71.9582	77.6127	84.8378	117.877	129.54	125.607
VIT_01s0010g03930	24.1983	26.8376	25.5151	195.925	256.04	231.13	159.181	192.757	173.476	409.857	416.646	218.431	36.8145	71.0255	120.144	15.3443	32.8665	53.6268
VIT_05s0049g00210	109.762	136.136	132.998	186.019	276.972	211.805	44.1163	50.3283	49.1949	127.857	155.287	202.682	139.236	175.722	167.686	159.006	222.963	109.444
VIT_02s0033g01110	114.758	102.693	102.982	219.108	227.194	185.267	126.312	120.163	123.678	187.879	230.24	172.557	140.19	135.57	125.78	105.205	111.106	119.468
VIT_11s0037g00940	277.393	241.263	229.958	101.938	102.844	115.118	121.303	126.835	119.691	22.742	41.6287	48.9142	111.374	87.6537	93.545	280.683	334.05	189.194
VIT_04s0023g01320	168.798	156.622	160.714	128.357	172.8	155.297	65.7253	72.4716	72.6779	195.159	223.425	288.852	116.762	182.362	205.94	84.1578	99.7679	93.2739
VIT_12s0028g03800	196.61	199.865	184.33	209.794	240.403	222.251	42.1002	40.291	45.7877	206.675	275.653	149.815	103.604	111.674	98.7766	108.646	118.072	88.0924
VIT_09s0002g06920	56.8223	62.563	61.4066	405.22	508.268	314.327	59.3408	72.5333	66.3446	178.372	258.476	74.0679	98.0266	93.152	67.9675	108.449	112.043	43.6391
VIT_04s0069g00800	152.563	127.64	127.324	196.3	217.183	181.927	164.31	151.175	142.593	139.831	166.02	151.619	108.239	126.525	111.243	128.081	115.976	128.617
VIT_00s0587g00030	38.1721	46.959	31.0952	321.23	422.17	293.149	22.9378	25.8519	27.5327	566.764	546.434	82.9553	44.848	58.0572	43.5041	21.7739	26.2514	13.671
VIT_16s0013g00450	3.87965	5.15741	7.7383	7.94762	9.53751	9.64599	1.03735	1.07985	2.16387	439.024	581.187	527.435	166.221	248.235	229.577	112.907	178.627	101.905
VIT_18s0001g15310	452.924	392.288	432.515	60.1335	67.6215	106.289	143.875	117.972	114.463	13.7723	18.4362	9.91345	46.9853	22.987	13.7745	309.02	198.847	108.034
VIT_14s0068g01370	132.524	152.515	133.517	153.434	178.934	140.431	87.9179	108.129	91.793	199.638	264.029	202.658	146.043	174.328	193.494	75.9037	109.597	84.4193
VIT_04s0023g01450	226.044	191.408	174.55	228.4	254.659	198.448	181.13	163.908	167.929	88.5538	108.482	79.4911	93.4695	90.0446	72.784	109.371	95.2553	101.074
VIT_13s0019g05240	111.426	97.2762	94.2205	144.732	170.663	154.276	96.026	93.2583	91.2229	240.127	234.743	215.651	124.066	118.242	135.626	153.976	165.028	177.449
VIT_11s0037g00950	278.419	260.212	266.821	126.129	145.285	164.846	105.691	112.263	105.439	26.5931	35.8657	51.4088	102.856	82.7317	82.1136	244.235	270.715	154.939
VIT_15s0046g01440	73.1031	56.6574	62.5293	212.038	249.946	203.533	47.9933	48.8231	51.5997	271.745	286.043	267.666	61.2384	68.8488	48.464	195.184	168.518	240.194
VIT_02s0025g04880	16.5706	15.2474	16.9771	198.01	138.933	132.731	202.651	190.595	187.306	6.9248	10.5874	206.264	260.105	407.05	501.929	12.9905	25.7145	81.8138
VIT_05s0094g00300	92.7355	114.132	93.6882	63.2503	56.1564	67.7521	24.9911	27.6677	26.6901	198.314	302.581	342.7	133.187	222.486	191.454	224.88	219.2	208.201
VIT_01s0146g00480	27.4632	89.0456	48.8362	213.755	284.717	175.985	2.7281	5.20645	5.81432	603.752	636.542	270.766	24.0122	47.4227	69.6805	16.1246	43.9031	44.0774
VIT_16s0098g00850	74.7572	90.7412	85.471	110.305	106.332	86.0551	115.464	146.177	152.611	282.128	348.027	186.311	110.311	133.343	141.83	103.961	164.061	171.397
VIT_13s0147g00060	131.194	208.889	183.367	186.886	197.413	216.889	95.2636	95.0881	94.9131	154.635	190.331	192.794	92.8769	141.269	190.795	69.0716	84.2039	79.5403
VIT_02s0025g00200	184.435	133.985	136.738	135.35	132.489	127.952	172.725	155.368	143.059	67.5675	52.8514	82.0191	184.109	147.2	122.977	254.636	194.787	176.893
VIT_05s0020g04430	144.621	116.749	121.905	62.1019	66.1254	64.5481	116.509	111.338	95.0576	136.305	142.558	139.777	124.228	103.375	85.6868	399.443	305.809	268.969
VIT_14s0060g02170	228.511	172.847	231.01	394.469	625.761	775.054	18.6463	32.0744	36.7144	16.98	27.399	24.1135	2.20752	6.34401	7.46286	1.34403	1.74046	2.05157
VIT_18s0072g00810	123.826	228.928	191.977	134.835	157.932	131.111	77.8925	81.2746	71.1126	164.034	221.496	240.806	115.336	155.729	199.827	94.0764	116.833	96.5898
VIT_08s0007g03340	193.53	237.458	226.409	130.495	137.481	140.271	121.648	130.239	126.018	135.53	182.417	164.303	107.028	140.277	165.99	84.422	95.9433	83.2373
VIT_14s0068g02150	40.4651	42.0333	43.7127	187.768	284.24	207.625	42.0312	39.0152	50.9552	320.486	429.475	427.685	47.8789	89.1007	82.7343	42.12	60.6534	163.009
VIT_05s0077g02290	171.022	235.63	202.265	95.1926	102.061	104.625	98.343	97.7438	85.6099	77.6687	203.93	233.815	152.738	224.25	257.531	87.6976	100.094	70.09
VIT_06s0004g01820	180.367	194.247	186.583	182.014	200.961	188.614	118.168	117.114	122.589	126.799	160.589	165.444	111.8	130.234	120.283	96.1063	93.6733	102.673
VIT_05s0049g01520	153.631	207.369	202.142	191.639	209.833	213.672	82.4554	82.3576	80.5803	120.587	131.458	147.371	116.592	132.181	144.804	136.525	130.126	113.566
VIT_04s0008g01490	25.2441	37.7963	25.5017	558.421	695.628	517.101	7.67738	8.96659	2.31403	9.68968	10.5133	5.87906	30.0851	59.555	50.4997	165.899	232.293	152.281
VIT_16s0098g00760	195.788	156.857	173.127	45.564	42.7158	72.5793	80.1969	82.1372	72.7339	178.058	162.198	145.311	138.904	121.378	123.272	330.701	214.464	259.342
VIT_14s0066g01110	229.664	226.123	230.94	70.7241	75.9906	76.6691	107.759	108.226	101.497	100.357	97.1239	142.234	196.424	205.608	187.567	169.137	140.874	124.967
VIT_08s0007g03620	248.85	352.707	251.965	93.7447	112.801	116.758	109.759	127.634	104.484	55.8002	163.058	189.024	103.022	165.891	193.138	61.6506	75.0915	60.8509
VIT_00s0533g00010	71.0887	72.9355	75.0048	177.391	213.451	179.177	27.8971	36.4621	33.2007	337.589	393.668	198.109	88.6074	109.002	79.2904	185.395	168.113	137.526
VIT_16s0039g01410	30.938	34.7398	26.3845	65.4572	68.253	47.3523	98.8062	95.7191	79.7987	253.32	312.459	256.499	154.162	193.396	222.823	238.299	244.149	160.896
VIT_08s0032g01020	152.623	192.045	159.738	132.491	153.718	125.516	102.022	114.401	119.385	107.118	174.623	200.626	150.965	149.783	181.185	111.08	127.907	127.892
VIT_01s0011g05560	124.466	170.508	126.046	233.586	234.035	175.844	96.1547	89.0429	91.5932	227.286	204.281	171.826	72.2042	86.0465	103.698	137.563	119.85	118.453
VIT_12s0057g00680	104.48	88.494	95.9463	168.293	190.136	161.782	81.9866	84.3565	79.5903	316.086	233.543	206.88	121.493	120.423	112.49	133.558	131.898	149.734
VIT_13s0084g00310	151.468	119.348	123.352	188.95	194.366	165.248	232.691	219.906	201.784	18.0727	24.0263	13.702	58.5822	45.6261	34.0296	323.49	260.845	205.59
VIT_04s0008g03100	90.3359	97.7238	91.4788	192.735	182.015	157.563	153.037	170.522	175.504	102.774	129.576	152.1	159.79	167.491	184.359	120.179	149.795	98.9351
VIT_07s0031g00670	101.735	116.107	94.118	271.075	304.678	298.284	76.1595	87.1959	106.039	278.353	234.482	114.678	73.9062	90.9582	92.3064	59.0378	85.324	85.2025
VIT_06s0080g00740	111.236	173.423	147.695	106	114.979	118.547	107.162	108.051	89.5482	130.562	238.222	228.128	139.139	230.487	251.017	83.7218	109.185	75.9662
VIT_18s0164g00030	417.835	373.662	375.489	71.3428	63.7735	104.286	169.881	145.537	138.724	27.3759	21.6813	30.4494	132.017	106.447	88.8999	132.588	98.1154	64.2861
VIT_11s0052g01250	208.706	186.846	136.701	423.632	300.818	235.609	130.341	118.911	237.291	9.30907	21.6155	1.55927	226.371	137.123	105.285	34.8235	38.2841	6.23845
VIT_08s0007g00010	100.928	107.382	107.269	223.131	277.555	236.851	61.3062	59.3379	61.2815	307.023	258.682	112.542	146.463	138.109	124.437	75.8068	90.3204	70.7757
VIT_06s0004g06940	125.861	104.24	125.526	57.4995	58.0569	69.0482	98.2524	103.009	113.597	54.2105	62.8954	100.434	198.688	221.384	248.837	239.602	368.581	206.201
VIT_13s0074g00580	136.397	111.68	121.412	121.997	136.605	124.095	61.8144	61.2295	60.273	182.803	178.782	299.076	115.785	133.374	127.47	183.674	159.347	236.551
VIT_08s0040g01870	105.454	151.935	141.443	127.957	157.94	154.262	95.3135	96.3661	87.2677	214.966	246.668	186.297	124.778	149.581	218.09	82.0061	119.79	90.0809
VIT_00s0301g00080	90.7715	132.143	117.357	159.081	172.114	159.041	27.0641	44.2237	40.5536	85.0352	161.889	355.526	93.6842	163.737	261.454	165.297	106.144	213.615
VIT_08s0058g01160	164.546	241.288	242.089	71.4564	82.3866	98.4615	16.1395	19.0918	19.8069	180.919	287.743	322.223	104.958	186.327	219.567	81.7005	152.362	54.3192
VIT_04s0023g02050	148.437	153.889	132.883	76.226	67.2983	75.0708	106.766	98.1659	108.631	164.047	191.251	361.519	98.3952	108.542	98.1834	155.423	156.572	241.7
VIT_16s0098g00730	121.625	178.229	157.268	107.493	116.649	118.071	115.769	107.957	114.519	144.966	191.972	208.519	143.411	177.173	204.44	101.66	121.638	110.826
VIT_07s0005g00320	192.386	157.065	146.997	191.971	208.23	170.934	184.853	167.077	167.993	90.3787	108.916	70.8182	95.1556	95.0958	84.7797	164.922	127.393	113.057
VIT_17s0000g08150	103.184	92.5652	96.9599	160.768	301.397	221.441	82.8871	100.272	93.4266	139.013	266.231	278.647	43.8035	110.731	128.824	101.265	98.8979	116.77
VIT_11s0016g04080	11.5335	16.1592	11.5223	546.453	775.386	590.81	29.5505	33.5655	16.4914	34.4346	30.074	23.0139	30.9061	48.0007	39.8364	65.0086	91.4131	139.272
VIT_19s0014g05020	122.967	139.598	122.921	157.204	189.439	143.919	127.656	129.709	119.249	125.937	226.186	150.033	119.447	135.364	129.338	135.7	125.405	129.791
VIT_19s0085g00630	188.569	157.357	161.847	173.081	168.723	159.178	123.247	105.1	110.169	119.171	178.928	159.936	117.287	148.424	131.199	99.387	106.956	112.233
VIT_07s0005g00330	173.998	159.96	147.642	207.725	262.206	196.596	175.056	158.926	174.289	73.4845	114.167	61.2212	82.848	94.4631	74.6555	152.084	109.783	99.9033
VIT_14s0060g00550	116.686	111.696	107.642	149.614	153.643	128.729	144.262	145.845	146.463	121.266	150.783	190.887	156.529	152.767	172.582	101.324	108.104	159.067
VIT_18s0001g15270	157.59	116.188	136.383	91.8671	116.889	120.724	40.1626	47.3796	51.3059	227.022	172.81	264.368	124.35	141.045	129.148	182.309	168.715	229.167
VIT_06s0004g00470	155.253	162.758	149.224	118.144	118.185	100.29	151.002	149.009	131.664	121.222	156.589	172.488	153.485	162.084	183.251	106.53	115.328	110.396
VIT_10s0071g00300	86.7813	96.121	80.7699	29.717	39.2692	38.547	1.79827	4.51187	2.84905	514.71	664.336	453.325	43.3971	88.8204	76.2772	38.9577	74.7373	181.922
VIT_07s0005g04890	78.1169	95.6302	85.0775	46.2076	58.0221	59.4179	47.3906	43.4534	46.5981	236.753	311.043	360.857	111.798	179.081	197.191	152.343	176.028	227.035
VIT_11s0016g02650	122.394	173.314	171.477	133.091	150.631	152.792	108.07	102.409	97.1444	134.609	190.783	173.442	126.728	186.644	235.797	80.5779	93.9268	76.9555
VIT_10s0003g02900	657.558	553.891	569.451	14.1763	14.5768	68.9416	62.9488	65.5906	41.6719	0	0	0	52.4716	38.6566	7.66393	196.533	92.8143	65.5412
VIT_08s0007g00140	135.401	129.224	126.235	206.935	233.213	191.776	115.105	120.39	129.473	221.781	252.714	171.343	63.1764	86.701	105.337	49.7741	79.1058	83.4692
VIT_08s0105g00180	50.8028	42.1023	51.3558	26.5139	30.5087	32.7503	43.2174	66.9064	76.3489	283.263	213.44	358.611	130.261	157.803	174.05	286.995	186.623	282.285
VIT_07s0104g00560	175.663	221.041	206.516	158.921	170.599	174.928	99.2289	91.969	101.867	105.842	131.932	188.997	111.782	164.826	164.83	76.591	75.0892	73.0869
VIT_13s0067g00550	88.2882	96.2754	95.8936	200.512	233.127	172.571	121.008	127.695	121.57	197.763	160.652	144.388	118.536	117.824	125.427	111.502	126.395	132.082
VIT_07s0191g00180	75.8958	78.4555	67.9832	203.05	218.171	182.805	218.217	230.263	242.348	196.207	174.809	38.0289	157.832	128.148	106.315	73.0923	52.8767	45.173
VIT_11s0052g01180	512.564	389.957	453.037	7.38631	3.42092	91.823	85.1491	56.4718	63.6221	80.5358	142.326	103.24	75.7807	113.538	158.563	69.0599	59.6248	23.5215
VIT_14s0060g02310	164.917	216.532	203.48	136.76	139.061	143.589	126.005	126.456	107.263	101.33	166.219	184.985	101.61	150.488	199.597	67.182	87.9399	64.7735
VIT_05s0020g01830	120.037	85.066	88.7601	132.432	152.3	144.382	211.393	214.895	173.17	28.7042	38.7312	124.513	176.456	218.647	218.025	124.828	80.1883	154.207
VIT_05s0062g00300	268.766	185.463	233.724	121.27	177.158	172.716	11.8878	20.7424	35.7422	286.979	183.365	177.796	72.5619	114.394	102.451	118.07	117.172	85.7335
VIT_13s0019g01660	106.052	138.178	129.842	186.98	195.384	196.063	71.3856	84.6968	77.5395	162.699	177.42	108.433	180.502	198.08	203.25	76.8233	111.386	80.0536
VIT_05s0020g04000	304.812	368.162	439.293	11.2349	11.643	77.0597	62.9477	77.3318	72.9214	69.5142	81.7156	161.876	49.6288	72.3078	87.2249	177.105	104.4	253.113
VIT_01s0150g00400	121.756	107.851	121.641	137.131	144.342	140.629	112.434	106.811	109.563	234.086	176.274	173.457	140.515	123.316	136.778	127.031	131.876	135.754
VIT_13s0064g00160	202.136	159.588	142.812	71.9992	76.6739	67.1903	185.612	157.337	157.213	45.4016	53.7647	70.5272	129.265	85.7138	85.5316	328.754	241.745	219.318
VIT_08s0007g01350	152.496	302.944	165.413	152.999	165.288	144.071	148.53	152.19	143.529	50.6133	197.612	79.0589	102.16	204.782	175.246	41.8173	69.4685	32.0523
VIT_00s0283g00060	135.689	144.373	130.417	106.644	123.019	122.195	106.297	97.3301	97.0349	99.4335	153.551	187.091	146.62	190.38	168.305	148.636	186.497	135.45
VIT_07s0191g00130	272.96	35.3793	27.4873	128.099	247.892	26.3083	328.796	129.675	28.6193	197.124	204.535	158.229	179.859	109.393	120.762	101.088	98.1732	83.5768
VIT_18s0001g05800	199.217	161.136	167.84	164.755	189.057	165.221	113.185	100.534	103.141	198.781	164.649	125.025	112.875	110.874	100.133	96.3841	86.2609	118.309
VIT_19s0014g01870	134.593	196.645	146.867	108.321	118.816	101.291	115.755	124.712	122.693	83.9566	171.758	275.221	125.762	182.418	204.499	67.963	88.7154	104.6
VIT_01s0010g03830	163.723	271.88	206.446	69.11	80.8452	84.7272	60.272	64.6998	63.4739	103.996	197.089	249.262	139.229	205.47	197.703	102.525	111.553	101.223
VIT_09s0002g05940	140.939	137.178	145.334	105.178	106.063	111.78	125.748	112.49	127.773	141.435	172.775	243.925	128.234	131.876	179.836	104.501	110.951	145.232
VIT_08s0040g01480	76.3819	65.7232	65.0897	221.63	235.71	189.293	158.804	158.958	150.27	175.939	122.396	121.911	145.676	111.549	126.198	94.8237	115.24	135.321
VIT_08s0056g00290	126.185	135.281	163.596	68.6997	65.0555	118.362	105.217	160.715	169.568	152.478	113.293	140.992	54.0281	77.4178	62.1911	343.268	284.179	129.614
VIT_14s0030g01600	126.418	109.624	124.902	154.157	201.785	173.898	87.0572	74.8594	77.2768	212.89	223.339	195.118	89.0038	96.2172	104.554	126.946	118.957	170.291
VIT_08s0007g03610	133.652	105.09	106.733	130.167	159.296	144.961	128.598	134.899	130.801	183.034	142.516	147.054	132.238	124.163	131.966	145.372	132.171	151.551
VIT_17s0000g03680	146.608	163.107	154.161	125.4	117.536	116.339	140.056	133.418	133.022	130.004	143.347	116.059	139.256	205.967	186.149	111.252	104.168	97.8008
VIT_18s0041g02060	73.1333	61.4019	63.5815	180.178	208.949	255.364	8.51852	13.5887	22.5881	243.185	269.837	295.853	110.186	170.929	178.501	75.1311	88.1875	143.649
VIT_05s0077g01100	145.635	147.238	141.957	143.792	156.535	147.42	115.363	121.433	114.569	184.956	215.175	197.95	98.0845	114.403	109.94	89.3941	95.9238	122.519
VIT_00s0533g00050	52.3506	74.6752	41.8931	133.264	174.437	126.522	51.4196	56.2973	59.2853	119.824	162.876	85.0411	168.662	169.237	143.75	348.744	350.253	143.559
VIT_00s0189g00020	150.482	264.546	227.778	94.2099	95.9875	107.076	42.7706	49.4992	39.7426	152.932	209.821	257.122	118.213	187.248	220.306	73.5696	84.4331	83.5943
VIT_06s0004g04200	82.3029	90.6946	85.0894	226.191	299.374	206.948	75.9323	75.5698	80.4637	159.833	200.1	237.75	84.4558	100.813	110.215	76.1268	92.1701	174.924
VIT_04s0008g01300	239.093	137.497	148.743	36.6135	32.8496	46.2012	354.74	265.139	273.746	20.3973	12.0021	12.0828	109.202	44.24	26.2427	382.106	209.254	106.088
VIT_02s0241g00080	96.3271	78.382	80.8465	248.116	316.183	241.568	88.7923	86.3524	78.3742	171.042	144.896	139.509	82.7774	91.169	81.4752	132.627	117.208	179.846
VIT_07s0005g05790	125.963	143.84	134.474	130.201	139.866	135.378	93.4913	95.559	111.81	173.731	210.271	235.274	139.812	157.748	151.019	72.9896	90.4111	108.966
VIT_04s0023g00730	30.0968	37.3461	40.4131	208.059	270.836	213.101	12.1177	13.2894	14.8908	377.437	288.663	321.642	116.75	135.91	76.7361	61.3039	104.708	126.654
VIT_04s0008g00470	76.5499	94.5194	90.9531	145.154	173.561	147.423	75.6321	73.6305	66.7603	279.385	309.494	214.209	79.6429	127.692	171.442	68.7073	101.412	151.809
VIT_14s0006g00820	153.157	211.289	196.831	127.451	145.65	134.228	111.329	110.857	110.952	127.228	164.493	155.588	112.714	148.616	177.985	90.4701	94.9873	72.1324
VIT_06s0004g00120	168.44	158.468	148.798	184.141	240.261	195.24	84.5516	84.9865	83.1006	199.893	210.16	118.571	79.0728	85.6242	75.1105	119.978	110.644	95.8583
VIT_01s0011g03370	120.171	108.205	99.9783	159.149	201.747	181.288	28.6139	33.1521	34.7448	313.47	335.598	205.662	82.9892	103.273	84.1303	104.885	122.032	121.337
VIT_00s0407g00020	95.6923	105.83	91.0743	149.108	192.061	157.386	65.3316	80.9259	67.2022	315.11	322.04	341.309	53.4509	75.27	118.434	22.1897	53.8993	133.66
VIT_03s0091g00700	166.308	151.022	165.629	145.739	149.535	143.368	148.141	138.008	132.997	111.25	93.3024	195.903	114.392	101.181	107.559	103.665	93.0134	176.714
VIT_01s0010g01180	58.3227	62.612	61.9542	94.9332	124.264	119.217	15.6281	16.2684	15.4333	408.845	470.132	376.56	64.4119	87.2178	69.0639	127.707	120.665	141.158
VIT_01s0026g01340	88.7797	82.5119	72.8096	300.065	507.899	319.913	67.1378	104.355	98.6872	142.789	125.139	55.8706	49.7387	39.9984	34.853	162.151	120.15	60.8716
VIT_00s0270g00050	96.7932	119.378	115.703	140.335	148.642	139.713	104.866	125.546	122.786	211.391	166.276	142.067	134.151	131.243	152.733	108.178	150.976	122.821
VIT_15s0046g01190	59.1347	51.4248	44.9432	128.165	140.633	129.039	63.4016	91.8058	100.599	369.527	327.975	84.8999	121.968	111.113	100.598	256.619	174.176	76.2674
VIT_05s0020g03690	113.102	124.183	151.496	108.629	136.737	151.495	54.4907	65.3001	57.4149	172.288	219.087	258.919	85.438	132.934	157.585	163.957	106.206	172.903
VIT_03s0038g01440	112.931	102.42	109.685	99.2984	81.1677	88.5694	117.325	113.005	108.503	120.296	170.765	429.266	120.112	154.512	154.287	80.5929	93.0528	175.658
VIT_07s0191g00090	127.964	140.444	124.754	198.234	190.83	149.226	147.598	130.498	145.614	117.496	172.37	142.66	117.471	120.418	122.25	85.3161	99.2292	96.2189
VIT_07s0005g03350	209.399	206.46	194.147	106.434	120.23	107.913	167.829	140.621	143.432	68.068	91.4261	99.6014	143.681	132.671	143.516	135.408	119.754	96.4542
VIT_13s0064g00170	254.169	199.651	223.991	99.3801	100.049	105.809	185.547	164.072	157.034	51.1423	39.7719	77.9165	143.898	112.798	112.122	162.808	122.761	112.611
VIT_09s0002g02630	87.3757	91.9597	79.8949	143.558	153.947	115.105	50.214	57.4957	53.3706	261.164	361.058	323.368	90.0184	102.947	111.722	93.3831	108.883	139.619
VIT_02s0241g00100	44.4181	32.5959	39.4551	126.497	223.34	148.133	50.3198	51.3089	37.0945	267.958	461.316	318.238	52.4066	103.296	65.5666	131.568	109.001	161.214
VIT_14s0006g01400	88.231	106.646	88.7693	160.326	196.196	163.095	13.4653	19.3191	14.4067	311.46	450.133	328.379	62.2336	90.0587	64.6584	68.6962	105.613	91.5781
VIT_08s0007g03950	176.187	150.295	154.202	225.459	248.338	230.612	160.266	147.613	145.261	111.357	99.1788	65.2233	76.1525	80.9353	75.8698	95.1617	93.104	88.0276
VIT_06s0004g03620	80.6075	71.4047	78.3674	96.0872	112.591	98.926	34.8344	44.5256	38.2175	273.182	251.321	239.679	103.454	147.414	138.016	215.305	208.047	187.621
VIT_06s0009g03670	214.125	219.694	286.18	35.4087	49.5703	78.1846	65.9721	91.4678	93.8069	264.415	246.049	403.027	16.2987	31.279	59.1826	51.9993	45.0231	165.517
VIT_18s0072g00100	72.5195	76.8684	77.4434	229.479	266.863	225.385	42.1063	51.0706	50.6257	271.449	265.529	130.44	80.1205	110.633	92.3585	129.701	127.058	116.969
VIT_17s0000g03730	145.408	247.75	181.357	138.06	156.075	146.609	97.8122	99.2503	89.1925	91.9598	147.448	200.571	114.949	151.904	165.619	69.9738	89.5617	78.6189
VIT_11s0016g01190	66.0189	67.7686	65.973	153.146	186.796	157.237	22.3559	24.4086	22.7265	433.533	410.04	271.07	76.62	95.362	80.5471	65.3617	95.8698	115.834
VIT_03s0063g00480	143.302	117.28	131.128	59.4688	75.4306	92.917	70.8153	76.1652	73.2415	75.2702	65.5783	116.336	159.777	172.011	182.943	265.347	317.818	215.731
VIT_18s0086g00210	125.354	91.092	109.067	30.6763	34.0634	42.4168	134.983	159.319	155.553	98.3804	105.955	192.632	125.742	124.813	146.863	263.783	183.684	284.488
VIT_04s0023g00930	148.866	276.281	189.754	97.4208	110.815	113.029	67.3306	75.2419	69.6933	100.03	206.911	210.624	115.464	200.95	219.085	66.8439	85.5408	54.9831
VIT_07s0005g00250	137.606	159.073	182.741	143.222	143.211	135.222	80.0956	86.7065	82.399	134.635	152.134	192.335	144.01	148.118	171.4	97.8563	108.693	108.718
VIT_18s0041g01290	90.145	72.8039	80.1722	24.9639	35.2727	37.1036	198.056	230.26	224.339	105.255	150.705	136.523	121.372	148.56	168.192	252.522	140.13	187.311
VIT_13s0019g04230	154.878	227.068	205.986	108.923	112.356	125.009	71.2884	73.7961	90.1695	104.414	151.943	290.239	119.916	152.921	165.686	61.541	74.9702	112.225
VIT_01s0011g05030	246.078	203.017	189.954	13.4199	15.2563	43.0118	25.5195	33.8789	25.1666	161.391	275.666	148.197	90.1584	100.728	95.2604	277.249	251.383	207.677
VIT_07s0005g00750	134.434	93.3377	106.551	280.592	191.235	197.957	143.467	131.764	144.557	131.64	97.8724	154.771	78.8943	99.203	111.146	60.5413	91.9751	147.859
VIT_13s0067g01270	61.9784	54.2757	57.6606	125.889	174.215	173.685	22.8842	32.2726	41.1111	354.683	321.309	325.367	83.6811	150.542	137.608	112.947	84.1147	79.9841
VIT_04s0023g02210	471.783	355.035	341.985	361.292	444.823	328.929	17.104	20.8888	9.16865	1.13845	3.83753	0.759299	7.36265	13.2922	11.1602	1.67118	2.83734	0.688187
VIT_08s0007g00740	34.2289	37.5499	34.1435	456.036	603.958	444.203	40.5178	41.686	30.6957	32.1133	38.4258	47.0767	51.1345	58.3748	55.4065	119.447	127.11	139.584
VIT_04s0023g03470	29.3897	31.6568	25.8614	522.523	527.29	347.976	152.842	161.181	172.237	86.2359	91.6239	36.3402	47.2608	58.8215	30.1559	20.6621	34.3446	11.875
VIT_13s0019g04070	281.177	223.138	221.6	135.703	153.087	158.615	177.21	185.409	187.19	78.0696	72.7514	108.909	63.4029	99.6599	76.8522	47.8443	57.2848	59.674
VIT_13s0147g00160	80.7983	59.9156	60.8496	232.958	204.721	209.104	110.561	102.246	124.414	399.425	299.621	51.5559	95.2543	71.3966	50.9647	78.4	81.1616	73.9117
VIT_01s0127g00720	180.28	186.107	185.235	197.742	204.457	196.8	77.9541	76.3603	72.1939	129.314	159.261	83.0709	101.933	103.295	87.2817	137.063	129.427	77.4891
VIT_14s0066g02610	232.644	234.15	199.957	19.6246	15.863	39.4703	112.765	97.6452	96.5924	15.3826	44.4445	116.833	91.1926	158.031	187.001	267.952	207.4	248.239
VIT_13s0067g00270	141.369	163.77	145.307	130.918	148.465	118.43	134.432	121.797	113.027	139.165	156.02	131.427	134.5	169.116	193.78	77.1122	91.5009	74.859
VIT_14s0060g01210	193.291	200.027	179.809	69.6915	68.1857	91.5115	72.39	67.5594	63.2714	141.17	213.142	189.804	103.952	136.741	135.919	171.637	141.028	141.414
VIT_06s0009g01180	145.841	122.669	125.286	160.189	175.677	151.352	117.299	110.857	95.2565	165.587	146.033	134.992	123.753	132.003	133.142	103.253	112.293	124.319
VIT_00s0174g00190	143.173	149.248	173.164	166.618	191.134	170.115	140.553	139.12	126.307	148.538	120.853	113.058	91.765	115.524	144.273	75.8588	97.456	71.7405
VIT_06s0004g00830	169.702	141.367	153.859	133.056	150.119	140.392	142.183	137.418	137.132	93.3877	104.566	110.522	103.1	101.909	93.5084	178.025	151.479	136.352
VIT_08s0007g00310	46.7366	46.795	53.1939	56.2348	82.0067	77.2701	8.50961	16.1616	16.7556	431.316	336.791	434.132	95.9713	106.922	112.068	102.692	101.29	249.785
VIT_18s0001g07770	61.7525	55.8856	44.4844	247.602	300.815	270.363	12.7356	24.3597	14.2249	93.2831	170.024	129.518	91.661	144.816	126.88	226.546	164.076	195.101
VIT_08s0058g00130	98.4482	132.006	136.423	131.49	162.414	144.338	93.1085	96.3711	94.7308	143.064	154.152	224.05	148.262	166.433	175.629	77.4829	87.28	101.117
VIT_18s0122g00380	133.235	100.13	98.8031	132.309	136.682	124.885	71.804	68.8643	69.3533	237.505	213.598	161.396	130.332	125.355	109.86	139.775	154.818	156.035
VIT_11s0016g01770	112.858	115.67	104.695	99.5899	100.1	97.363	55.0972	60.4202	62.0549	273.132	259.485	158.269	108.348	130.944	121.969	162.914	178.685	160.326
VIT_01s0127g00540	53.9965	82.6772	90.145	287.683	195.113	175.385	338.278	386.229	351.308	79.8043	36.4902	27.0132	9.19655	27.843	40.6422	43.014	121.598	12.9599
VIT_14s0066g00450	102.91	91.4217	103.019	115.527	149.152	129.054	70.5999	71.0466	64.7328	233.81	199.217	236.241	114.367	121.912	135.404	143.315	120.571	152.453
VIT_09s0002g04300	115.92	113.017	128.167	126.471	117.524	115.915	140.548	126.504	133.189	132.75	107.797	210.048	141.383	160.293	174.576	83.1092	93.9254	132.902
VIT_17s0000g00980	142.07	181.155	185.636	113.88	133.669	114.971	111.067	112.039	107.406	147.08	140.863	172.992	120.303	157.307	205.407	58.3253	81.5824	68.2738
VIT_18s0001g15650	17.531	23.5357	17.5724	91.2452	112.831	59.5042	156.55	131.617	145.17	111.83	190.815	91.4374	144.587	200.627	177.33	203.386	257.035	219.381
VIT_06s0004g01570	52.0394	59.803	77.1709	1.15795	0.543957	9.31577	0.736642	2.14711	1.74149	272.91	352.991	896.793	31.3224	64.2467	73.4385	48.3977	57.77	348.712
VIT_18s0001g02470	148.917	140.855	138.106	112.041	98.9888	103.494	110.173	113.986	110.087	207.023	169.148	147.363	128.807	141.923	161.895	98.5841	119.464	97.1804
VIT_06s0004g00240	82.9856	70.4593	67.0676	249.701	301.695	206.746	141.872	134.742	107.141	113.503	69.2433	73.1941	100.34	82.4501	100.827	149.127	139.75	156.151
VIT_02s0025g03020	150.423	102.495	112.365	31.77	37.9467	46.4706	155.487	153.692	144.14	103.894	129.196	129.207	119.73	108.77	118.979	252.671	186.4	263.158
VIT_11s0016g00200	111.875	102.574	117.506	85.9811	69.8358	76.9332	284.446	287.076	302.796	20.0561	32.5225	104.189	112.763	122.336	141.885	145.618	78.9729	140.506
VIT_09s0002g03380	87.8576	68.3799	67.3179	326.978	416.121	311.893	81.3996	81.3975	74.7179	172.371	173.339	44.759	91.3568	72.4001	47.2435	83.0431	72.4723	63.2299
VIT_08s0058g00870	169.987	211.882	192.161	67.8645	59.1	84.1135	104.929	95.7032	125.712	114.857	118.355	227.57	130.571	124.47	131.012	123.452	101.648	150.949
VIT_03s0063g01770	179.567	303.381	289.072	158.863	58.292	124.616	117.139	117.399	163.366	16.5041	20.3273	81.0323	136.296	244.784	191.98	36.779	57.9127	36.179
VIT_05s0062g00250	93.866	84.9181	82.408	227.592	154.288	116.74	309.178	251.116	301.156	1.63521	4.99847	0.417278	237.029	185.136	229.116	32.617	16.8709	4.25473
VIT_02s0087g00160	81.5048	123.952	99.4475	181.835	198.528	187.079	74.4638	73.0524	74.3877	110.446	178.685	251.48	104.811	167.231	147.108	86.9279	95.3486	96.2212
VIT_17s0000g01810	149.459	104.528	112.039	129.225	167.34	157.068	51.3394	43.6982	45.162	166.391	183.749	110.164	98.9655	104.119	80.1921	228.058	170.727	226.109
VIT_18s0001g11580	147.38	134.152	143.919	229.477	217.521	181.669	315.577	286.732	268.113	32.4642	37.7326	35.887	73.608	81.9611	78.512	18.6396	24.5453	19.7918
VIT_08s0056g00200	78.238	70.6071	75.3712	119.227	118.391	106.686	105.841	99.0856	94.4661	244.578	185.883	208.523	153.489	145.781	179.171	92.9672	102.034	146.077
VIT_01s0010g02280	222.951	226.815	238.66	84.1967	85.8557	93.8272	120.012	106.936	112.224	79.6606	109.955	133.698	85.8093	85.6062	82.4108	182.369	148.02	124.358
VIT_13s0019g03550	57.9334	55.8102	56.5166	214.224	310.233	207.432	48.628	50.3804	44.8211	362.364	388.959	133.238	57.2533	67.6752	57.2269	80.4516	60.0442	66.3968
VIT_15s0046g01220	105.262	227.279	169.472	166.749	191.322	198.736	49.2081	56.6083	72.2515	121.96	151.018	182.929	108.739	151.079	179.792	57.1857	73.6046	55.9031
VIT_08s0007g07210	136.374	211.559	141.731	85.9117	97.6055	94.5153	102.547	94.2419	73.0488	95.1291	229.976	219.741	103.081	172.574	208.285	78.6203	98.8482	74.1674
VIT_18s0122g00780	110.259	90.3052	93.2823	15.9637	19.3878	27.4299	54.488	64.5479	57.215	78.4222	107.93	152.747	178.017	157.981	164.34	424.826	260.448	258.771
VIT_03s0088g00620	322.675	263.538	225.889	68.5323	67.3374	85.6041	41.7347	43.2866	31.4228	118.228	238.429	158.616	112.104	131.771	105.08	108.818	124.524	68.3147
VIT_10s0003g02790	112.511	148.918	129.859	106.51	109.772	116.765	99.4404	85.8179	95.6797	109.626	185.599	232.281	124.418	168.191	189.338	96.4004	102.377	101.238
VIT_17s0000g07190	5.91994	4.477	4.18144	442.857	633.971	457.328	13.0794	13.511	6.51592	31.5117	28.7049	20.8496	37.4434	51.9943	29.0158	141.633	168.235	220.906
VIT_00s0510g00050	60.9701	48.4564	51.2364	217.613	306.794	238.984	31.4221	32.2735	24.8517	298.796	238.239	207.455	59.2594	83.8694	101.948	52.341	122.101	134.252
VIT_07s0031g01420	243.057	166.258	189.244	67.5643	64.3451	78.1696	182.48	148.437	142.029	77.7539	60.8409	68.6639	77.1867	46.9131	37.9897	288.092	204.015	163.494
VIT_02s0033g01100	109.43	92.2598	100.05	212.147	156.105	167.348	132.915	131.499	129.776	191.209	157.955	120.008	124.279	99.1833	97.1021	88.8757	94.6941	100.425
VIT_07s0129g00090	109.435	143.981	113.798	84.8067	103.612	85.4314	56.5239	61.1189	49.8325	119.937	249.981	235.284	155.537	231.502	269.701	69.7151	88.5885	72.9405
VIT_01s0026g00140	146.817	104.643	113.905	169.705	224.243	185.278	150.714	136.497	137.844	110.759	85.4898	44.2312	96.3048	86.0868	61.7926	165.895	122.548	158.442
VIT_12s0134g00170	294.726	292.537	264.049	15.9622	22.5278	53.8945	66.9934	64.5153	54.0178	60.1322	173.739	424.491	61.8792	115.974	119.945	76.7714	62.3654	75.8525
VIT_06s0004g04460	123.982	100.824	108.577	138.565	125.101	117.733	98.4302	87.1261	90.3054	116.134	98.0227	177.583	133.176	121.88	112.037	196.891	149.182	204.765
VIT_11s0037g00210	70.9523	56.5114	58.554	150.735	166.849	123.698	111.005	106.945	101.72	208.022	242.136	202.872	121.04	105.916	110.078	93.8887	113.247	155.247
VIT_15s0024g00410	483.457	480.116	543.051	89.4977	89.049	199.174	54.7859	67.8409	62.0694	25.3701	33.7115	43.304	25.0124	36.9586	30.8107	9.42948	14.9382	9.98906
VIT_10s0003g03150	115.163	149.558	140.17	92.2956	86.5283	96.5656	47.202	50.9416	54.517	223.325	194.45	201.47	150.759	206.425	257.274	61.6638	95.1163	72.7691
VIT_16s0100g00650	106.474	160.516	156.621	93.6794	101.736	97.8072	55.5197	56.9141	52.9676	210.442	227.997	201.223	118.919	189.251	227.498	71.9552	95.7099	69.9515
VIT_18s0001g05550	108.927	97.3343	106.126	168.104	186.375	154.64	124.594	125.525	119.114	133.366	140.628	112.107	111.104	111.029	110.35	143.988	123.924	116.503
VIT_06s0061g00810	202.173	217.739	245.77	202.485	212.712	188.001	100.746	90.8962	96.5723	40.8817	71.2688	72.7715	87.6078	80.7517	64.2247	135.816	107.678	75.0548
VIT_04s0008g02100	151.182	125.182	123.278	122.432	126.504	122.279	117.42	111.579	117.533	157.428	151.197	122.775	91.9969	91.0453	89.9893	175.932	137.946	155.846
VIT_07s0005g00290	144.759	170.517	162.39	159.912	170.594	148.828	112.795	104.866	119.504	80.949	99.5285	233.589	92.5592	114.938	115.449	64.8965	73.2283	119.883
VIT_07s0005g03340	14.5801	44.2314	31.2467	156.759	176.904	140.175	3.22483	8.19098	6.09904	384.386	394.341	166.459	113.161	151.812	192.12	95.3962	119.793	89.8926
VIT_08s0007g08000	119.173	158.383	152.848	69.7925	91.5947	89.9195	25.2447	41.03	41.3313	126.046	386.567	420.252	34.7956	62.5584	105.574	106.092	120.027	136.33
VIT_14s0108g00840	110.479	100.85	100.519	272.468	328.664	269.99	22.085	21.0838	17.9012	287.946	201.39	83.5023	82.746	78.1141	53.0214	87.7778	91.6116	74.8075
VIT_06s0009g00370	0.752751	1.30974	0.853442	8.95418	10.5187	11.5795	15.5122	28.968	40.715	127.351	120.062	254.714	165.16	168.862	229.124	442.32	251.01	406.469
VIT_08s0040g03040	251.552	165.894	187.129	127.825	165.556	194.614	19.8079	31.3013	38.4563	166.596	228.852	208.04	76.6198	127.176	99.2161	75.8484	42.02	77.3156
VIT_15s0046g02420	61.4217	168.631	160.308	157.081	171.664	117.735	41.2237	58.4077	60.0945	88.3876	169.9	218.143	69.6851	85.3436	143.495	125.729	214.59	168.614
VIT_17s0000g07610	105.64	156.799	116.418	123.499	125.887	121.079	76.7791	83.5401	77.0102	123.579	192.309	199.371	126.148	172.306	199.293	75.1893	115.243	89.4173
VIT_12s0057g01200	80.4508	90.2748	84.2406	101.079	100.282	85.4139	110.557	133.118	120.749	135.927	149.273	242.067	138.006	156.17	176.67	90.2103	117.391	165.045
VIT_17s0000g02930	233.532	260.361	264.093	9.76115	15.4696	46.8636	7.91832	9.04975	8.92546	160.677	216.925	239.913	106.328	147.02	124.471	155.581	162.356	105.635
VIT_02s0012g01130	105.045	92.2675	71.647	202.263	259.934	156.167	67.8132	66.8453	75.3139	98.5155	252.614	221.623	76.1299	81.9525	87.5737	93.3385	107.51	156.048
VIT_00s0551g00010	174.51	197.217	179.774	90.8654	85.0848	89.7588	121.211	120.32	119.853	103.423	99.0381	164.327	117.888	138.669	169.467	81.4895	101.442	113.478
VIT_05s0062g01320	126.159	200.555	182.459	126.63	145.459	124.781	40.0306	42.1275	44.6664	136.779	172.32	113.138	223.088	154.838	137.819	86.3849	165.002	45.0839
VIT_16s0050g00950	70.8905	63.4011	62.3673	175.576	213.34	178.186	55.2436	62.577	58.415	212.203	169.25	204.61	105.66	112.285	90.5237	134.69	135.949	161.647
VIT_11s0016g04760	90.1988	112.82	87.8925	184.023	229.898	155.917	15.7086	26.7436	18.5434	318.313	409.177	165.802	45.1482	68.2866	79.7953	68.1725	85.0149	102.845
VIT_18s0001g08910	155.441	127.211	128.752	319.038	381.314	283.604	118.43	116.342	97.8883	58.7744	51.3442	29.3899	67.5426	78.1527	50.906	64.7945	82.1995	51.3465
VIT_06s0004g00440	116.413	161.102	122.919	90.1203	89.9134	87.3899	44.737	50.4183	60.7994	257.986	521.515	101.893	129.196	135.487	121.354	68.3759	76.6578	24.8731
VIT_06s0061g00790	53.7091	42.8135	45.2871	119.058	121.264	95.3133	142.889	104.228	132.531	43.4644	34.6945	384.234	104.885	118.291	137.247	47.1045	46.0587	485.41
VIT_19s0090g01080	130.563	125.322	114.928	149.341	172.011	152.877	100.929	84.5085	74.1755	119.919	189.406	214.421	78.8958	96.1326	84.1144	138.53	103.242	124.561
VIT_04s0023g01700	67.0753	56.4979	51.8836	231.177	253.807	183.29	228.881	160.258	167.738	96.933	167.685	93.2742	101.826	112.881	61.334	77.8935	67.2405	68.7252
VIT_05s0077g00510	69.1553	69.0191	66.3212	121.418	149.416	124.907	131.081	123.709	128.092	340.578	273.496	112.976	48.6421	82.0588	79.6698	106.744	107.84	112.406
VIT_18s0001g15410	175.448	200.76	246.019	35.0094	23.313	89.4629	89.5104	64.7631	54.6884	36.9113	61.6215	500.659	104.467	116.216	67.5128	33.6922	19.1129	325.915
VIT_04s0008g06920	91.4648	74.0006	77.1391	137.298	200.273	157.575	51.1638	43.9988	35.3399	454.252	493.792	133.025	54.6636	49.3125	42.9385	61.0118	49.4024	36.8222
VIT_04s0023g03190	103.297	152.755	132.046	130.392	147.509	132.014	87.1118	90.7986	82.75	121.515	163.686	219.068	119.863	141.997	161.277	75.5186	88.4832	92.1752
VIT_12s0055g00700	131.016	207.688	185.845	82.6884	100.455	86.5351	50.3543	53.4277	51.5611	108.342	180.799	218.041	145.498	188.451	215.194	71.244	95.7332	69.1029
VIT_08s0007g01430	45.5175	38.3244	36.7582	56.7033	61.7672	61.2568	30.6392	33.2644	34.8098	186.082	233.603	395.767	192.82	242.252	227.151	112.972	102.702	149.16
novel.292	91.4289	150.183	88.5802	26.33	23.1644	32.1421	58.9341	57.3875	41.7779	52.279	278.869	307.496	147.874	283.677	322.678	85.6196	116.63	75.5151
VIT_11s0016g01920	104.673	93.1919	84.4578	132.985	141.997	123.154	107.977	104.034	108.319	141.621	139.816	165.923	139.165	150.468	158.247	102.208	114.789	126.947
VIT_08s0007g00530	185.053	175.343	188.451	121.627	147.798	142.485	86.14	89.1514	84.3134	123.139	111.149	112.938	100.5	96.7108	88.1656	142.134	134.922	108.699
VIT_02s0087g00710	308.816	223.591	193.818	105.241	100.308	119.154	15.6173	13.1919	20.6246	167.083	133.816	107.984	211.898	146.227	74.982	89.2152	114.333	91.7416
VIT_18s0089g01030	333.777	404.197	355.581	51.9224	52.7716	80.9695	4.77302	7.73796	5.88578	37.3119	69.8953	114.409	123.512	177.257	190.029	115.668	36.7627	74.4893
VIT_01s0010g00950	80.4832	66.3931	67.0077	201.678	292.588	196.734	27.3197	26.3435	27.9359	304.778	279.27	166.793	56.4491	66.8993	46.1501	117.407	135.214	74.7941
VIT_11s0016g03900	71.559	64.2203	55.4056	84.734	116.354	99.9075	6.0604	5.73793	5.83018	530.159	529.162	318.64	40.2029	70.9505	46.8895	52.4287	60.4207	75.5609
VIT_18s0001g08230	108.356	95.5219	93.4711	112.388	113.577	98.8352	20.9268	30.7302	25.0475	247.464	257.087	235.154	120.151	138.095	127.016	115.978	143.537	148.653
VIT_08s0007g01570	269.725	208.403	241.847	56.8175	66.7083	83.6695	166.723	145.717	135.318	38.7601	29.5436	35.5428	112.761	79.2259	50.6488	223.072	171.13	115.363
VIT_17s0000g01520	112.752	154.826	146.116	111.769	113.806	113.689	88.3353	87.9266	84.8869	146.605	176.886	191.004	108.985	153.605	185.453	77.9278	95.6898	80.0374
VIT_14s0060g01550	234.165	220.022	204.323	128.84	118.84	137.9	148.307	151.003	158.113	60.0731	69.3289	90.3929	96.7256	100.287	94.4932	74.9484	67.9677	73.9845
VIT_15s0048g02270	188.986	143.267	158.851	74.1164	63.8908	86.7923	226.521	207.075	198.385	71.0215	73.5855	55.6388	64.6398	75.6197	59.9376	212.128	135.975	129.974
VIT_09s0002g00220	71.996	77.3736	88.2721	28.9573	39.7844	38.3508	64.4557	90.6236	97.3157	111.313	146.848	233.315	128.127	186.439	252.452	211.117	120.779	233.086
VIT_01s0011g05680	35.2933	60.7888	56.7315	184.122	275.727	310.644	7.77913	13.4964	12.0375	192.677	281.62	299.197	53.7694	111.652	100.049	54.3358	61.312	108.939
VIT_01s0244g00170	266.468	288.519	283.372	22.7907	20.6321	49.0644	58.7574	67.8374	66.1425	2.15313	3.52523	11.0575	354.292	396.031	280.801	23.3145	14.4183	10.8401
VIT_19s0014g01460	132.657	160.354	152.32	144.565	132.496	132.09	89.6342	89.1	100.228	116.153	135.831	165.616	110.947	127.315	143.316	86.8941	104.595	95.6515
VIT_01s0150g00330	134.469	91.8307	112.529	13.0665	10.7879	27.1865	93.0087	120.907	124.246	161.179	128.483	174.082	70.2512	110.146	80.2671	347.349	228.212	189.499
VIT_07s0031g01740	113.39	129.525	142.556	122.344	139.416	130.648	90.6635	92.7952	102.276	187.799	131.721	153.717	119.401	124.069	160.498	82.1694	99.8266	93.898
VIT_18s0117g00130	92.2459	142.37	139.074	164.188	149.443	155.917	71.62	78.5157	80.467	140.025	151.403	220.132	90.5048	117.244	129.861	73.3918	102.098	116.269
VIT_15s0046g01650	253.935	302.383	277.472	65.5777	61.7515	99.2988	81.4487	83.57	99.2204	64.9664	72.6842	98.3874	126.387	142.934	147.131	92.5617	87.2177	57.8144
VIT_16s0039g01070	61.852	64.8367	67.8731	36.5977	63.2052	55.775	9.68886	10.3774	8.12462	722.827	725.262	227.006	12.1243	26.4418	40.4899	12.0561	33.4354	32.3381
VIT_04s0023g03510	257.547	185.91	217.048	42.6466	34.5931	56.812	184.716	156.256	155.941	28.3044	22.0075	54.9781	210.782	142.351	95.1726	173.252	106.627	85.156
VIT_15s0021g00940	71.517	89.9098	103.283	74.0829	55.0644	86.0848	342.077	339.218	320.426	28.4721	42.3377	190.969	43.5036	73.1686	53.4044	71.3538	59.8541	161.572
VIT_14s0108g01280	85.6225	67.5682	68.5474	226.37	224.791	201.701	74.6823	78.2293	85.9509	242.665	237.279	104.983	104.339	114.543	107.265	60.8253	42.8159	77.0221
VIT_12s0142g00610	65.434	54.3215	56.3476	162.848	200.703	158.074	90.2389	88.5781	101.925	225.896	155.931	277.006	86.1713	114.446	108.488	48.2039	72.4809	136.283
VIT_15s0046g02190	34.6004	31.1214	30.5888	82.4113	115.191	83.238	9.32813	14.0544	16.807	451.274	454.308	422.698	63.4915	67.9732	48.438	101.367	80.1926	93.6073
VIT_05s0020g00970	87.9203	124.256	103.972	147.334	155.859	140.98	87.2322	101.433	101.118	126.029	161.967	127.008	120.239	174.512	179.441	69.4382	102.209	89.3069
VIT_08s0058g01020	146.405	147.436	159.069	125.027	128.472	126.668	87.6196	86.0778	102.446	102.396	124.931	173.885	117.315	138.85	142.886	84.832	89.3202	110.815
VIT_13s0064g01510	174.506	129.733	126.001	27.3947	28.5139	41.231	73.5686	78.1832	73.2743	130.354	173.948	172.4	135.718	152.302	137.315	185.737	159.941	193.596
VIT_16s0050g00080	172.958	145.305	167.232	90.4745	101.05	118.969	53.8702	53.0733	68.7728	54.5598	63.0411	93.3259	201.99	178.513	142.863	239.893	148.59	97.8804
VIT_08s0040g02980	165.985	139.876	145.106	178.459	176.161	165.886	140.697	133.156	126.717	108.63	124.003	76.4505	65.1574	76.7477	65.1522	106.507	92.8535	102.64
VIT_05s0020g02530	199.19	158.301	153.749	160.433	151.833	141.422	82.5248	77.6151	85.1179	107.482	90.7832	61.6676	100.436	82.7971	65.1356	188.668	156.32	121.689
VIT_01s0011g05630	195.713	193.381	195.851	90.1572	80.1722	93.474	76.987	72.2845	76.1161	108.538	142.477	130.055	138.654	154.702	138.242	111.619	97.081	88.5796
VIT_18s0157g00190	41.9501	39.6649	36.9449	184.316	238.349	196.981	43.091	59.071	61.62	331.862	169.457	136.115	93.1175	103.925	82.6217	101.064	155.342	107.99
VIT_15s0046g03680	148.204	239.912	180.113	157.082	149.688	159.976	85.685	93.1426	88.8984	84.9328	121.884	140.607	81.9305	131.876	132.869	57.3673	69.1097	58.2212
VIT_06s0004g02840	100.124	163.432	131.481	124.693	156.437	126.273	101.094	101.522	96.573	103.223	152.496	163.176	107.811	145.486	170.557	75.4764	90.944	70.5799
VIT_08s0056g01570	61.0917	77.265	72.9418	188.159	200.481	137.178	108.059	133.964	143.494	145.287	135.905	75.1901	143.091	88.6027	104.301	117.367	148.167	97.4816
VIT_12s0134g00490	8.63933	9.05362	14.8836	12.328	13.4469	14.7188	36.7417	82.8503	65.8421	197.233	235.161	316.134	97.4381	154.757	198.806	220.863	247.162	250.273
VIT_01s0010g02540	85.0844	75.6467	62.2891	133.098	176.405	130.6	118.54	109.319	111.424	145.391	184.191	120.133	112.632	119.4	110.368	127.539	131.778	122.269
VIT_03s0088g00380	104.704	173.304	155.916	80.4539	88.0202	68.2552	42.3933	43.92	43.3843	128.277	184.762	188.394	215.417	179.586	187.961	82.0386	112.249	95.454
VIT_08s0007g02350	127.206	149.131	147.166	85.4875	90.7338	93.8861	113.724	132.002	143.179	33.3646	39.1688	74.001	150.117	145.491	141.438	187.411	189.473	130.711
VIT_16s0050g01220	16.3275	13.3484	19.1473	16.6172	12.6208	13.6034	15.8485	15.6487	16.2793	289.142	455.199	357.955	100.006	167.858	170.051	148.485	147.101	196.208
VIT_04s0044g01140	118.54	146.236	138.135	146.894	175.182	154.891	75.0924	72.8421	65.2123	146.176	172.082	162.236	95.7943	121.616	140.751	74.1979	86.8515	78.2186
VIT_02s0012g01120	305.589	294.835	318.183	35.9653	36.695	61.2733	105.464	95.815	94.2833	60.0414	78.7513	53.3786	89.662	88.3589	49.0185	196.217	134.772	71.5294
VIT_14s0068g02050	116.223	113.228	87.9953	129.915	160.223	130.993	31.9188	37.5338	33.982	143.641	279.477	137.102	122.367	180.128	181.338	97.4547	100.054	84.958
VIT_01s0026g01650	94.762	100.807	98.5761	117.609	125.937	105.651	124.889	138.487	126.268	132.529	136.279	161.706	110.377	129.302	173.309	83.5499	106.316	102.106
VIT_07s0005g01530	120.245	112.985	133.223	82.3983	76.6313	78.0509	94.6047	91.544	74.7302	127.47	123.901	138.419	182.65	176.39	172.212	149.311	125.602	107.909
VIT_08s0058g00460	93.4558	119.738	113.35	120.968	122.474	111.179	43.7641	48.5315	55.6403	223.944	217.877	176.197	123.398	155.237	156.782	83.5062	115.95	85.1607
VIT_07s0031g02200	81.1371	79.199	94.3079	39.6933	32.4823	46.5496	99.3721	123.783	105.837	88.9359	102.842	268.865	172.258	170.069	201.154	99.4095	117.148	241.589
VIT_13s0019g02930	36.4461	33.9917	32.9901	462.978	674.235	512.527	38.8719	43.8423	29.0795	7.05619	8.76081	17.9628	19.2147	34.1484	30.7429	52.8914	33.6228	91.5781
VIT_04s0008g07020	118.908	84.4625	86.0412	81.6781	76.4362	65.8593	193.448	154.066	169.452	27.5015	30.335	204.541	75.6461	69.5307	75.9057	153.734	140.139	348.8
VIT_14s0060g00820	263.938	206.965	249.044	35.3613	35.6973	66.5663	106.366	98.971	91.5113	88.1595	75.8624	89.379	146.054	106.705	76.6644	182.402	130.453	104.588
VIT_00s0260g00080	175.351	245.309	204.744	122.896	146.221	146.321	77.3556	70.0736	89.7462	69.4523	130.227	146.307	94.5159	124.711	140.589	51.6771	62.7857	55.7514
VIT_06s0004g00360	117.005	116.237	113.667	108.339	116.049	106.23	127.074	119.676	102.473	149.335	146.713	140.653	123.057	145.624	164.419	77.9483	90.201	85.9569
VIT_06s0004g01510	114.802	316.547	247.116	145.344	105.779	85.0931	126.194	142.146	160.551	198.284	64.4257	62.6067	18.2964	38.9993	125.973	15.8688	72.6056	108.364
VIT_06s0061g00270	91.346	78.448	84.0472	211.535	253.285	173.386	110.698	115.871	96.075	87.2269	59.0758	63.8358	122.966	112.454	145.835	121.068	122.252	97.7184
VIT_02s0012g02220	178.437	137.562	135.734	86.5747	96.9996	108.731	87.0622	99.8467	105.439	196.994	187.662	170.543	72.8242	101.779	96.268	65.8704	80.2784	136.102
VIT_13s0019g04060	6.52866	8.95247	7.54246	29.0754	31.5926	22.8975	10.7803	16.877	19.751	183.078	162.151	416.464	157.774	242.032	190.027	192.633	178.646	265.014
VIT_16s0050g02620	156.378	139.965	132.171	228.81	245.736	203.733	100.863	101.82	86.4663	47.069	75.3081	52.9847	65.6995	84.1701	62.8136	135.106	105.851	116.131
VIT_07s0005g01250	77.4408	97.6607	91.864	98.2555	90.9158	88.4566	84.6381	87.6791	86.8746	160.173	177.353	365.789	90.4269	117.498	133.085	60.6644	67.5493	163.252
VIT_13s0067g02990	172.673	191.095	191.447	112.212	111.756	108.404	130.531	128.139	118.033	67.9238	85.0471	118.749	94.4697	113.543	110.947	99.9182	96.3151	87.756
VIT_13s0019g02360	136.876	106.378	108.928	113.488	104.931	96.2314	179.98	183.217	168.575	36.9529	35.455	121.027	34.7918	37.0783	42.4437	148.915	154.412	327.983
VIT_11s0103g00270	120.149	185.603	142.728	80.7249	106.487	94.3662	67.4357	71.4059	67.2896	89.1611	165.101	205.985	127.381	163.175	198.984	72.3686	94.1126	82.8088
VIT_06s0004g04930	80.8627	68.3445	69.8513	126.545	135.306	115.753	76.6961	78.6139	74.3604	201.451	206.306	149.583	109.253	107.976	99.7169	153.827	137.739	142.058
VIT_16s0050g01700	76.0594	69.0016	72.6199	68.0843	83.8916	79.4353	30.726	33.291	35.8087	174.07	135.461	185.958	115.425	138.001	119.993	214.692	208.065	293.592
VIT_03s0063g02420	118.066	138.212	130.022	154.712	163.507	148.851	73.0635	73.3641	73.6223	109.022	152.329	184.189	107.998	123.382	129.937	68.3203	82.988	101.952
novel.822	86.4678	153.859	101.71	108.476	130.233	106.097	92.0825	89.2556	79.3229	88.0016	173.698	193.059	117.309	188.673	222.651	61.0471	82.0334	59.4553
VIT_06s0080g00400	93.2667	118.788	125.273	139.999	159.062	150.399	95.0181	94.9751	91.617	146.239	159.314	139.656	91.5207	116.966	154.183	84.4525	99.366	70.2219
VIT_18s0001g11250	95.8939	88.3864	73.5542	206.372	222.48	169.69	73.9062	83.7774	71.6166	313.448	267.978	93.4244	75.5509	63.092	51.9693	56.4027	57.5951	57.84
VIT_03s0038g02280	90.5525	86.9097	88.367	155.402	217.243	187.907	37.4	35.5751	36.6239	121.838	69.6851	87.39	95.3748	115.429	91.2748	212.199	269.021	122.683
VIT_18s0041g01860	185.331	156.28	164.209	130.558	130.613	138.742	91.3538	94.4316	99.9453	109.482	94.6269	106.999	116.458	126.408	133.68	67.9237	87.7396	85.3325
VIT_18s0001g00230	140.452	222.368	190.293	100.933	113.597	112.848	62.3036	73.4205	60.1587	93.1861	142.279	186.553	106.455	148.65	179.235	59.2994	62.3775	65.297
VIT_12s0059g00890	76.1538	82.1184	74.5267	118.602	137.024	99.9555	91.7629	91.7707	86.88	143.954	191.886	192.587	132.87	146.842	155.487	88.2069	106.816	100.424
VIT_14s0066g00410	119.046	92.2858	111.797	95.2661	101.364	96.8478	137.594	137.212	129.172	81.3555	99.0675	106.391	94.3123	87.9607	71.9248	211.347	161.107	183.736
VIT_16s0100g00470	159.039	146.632	146.019	77.0101	86.9624	98.5566	32.2718	42.8652	40.2067	233.547	199.71	118.722	115.677	114.107	101.812	152.092	160.683	90.9889
VIT_18s0001g02510	92.7308	89.9802	94.4305	64.2759	57.4733	63.1022	74.6662	80.1016	75.612	185.492	147.233	133.473	172.375	162.557	174.376	139.103	207.076	102.58
VIT_16s0100g01000	6.80787	8.33989	8.11512	6.17741	7.80617	10.1843	1.19147	1.45916	1.58159	375.525	342.035	500.669	136.452	221.973	278.219	44.4336	79.0211	85.9089
VIT_06s0004g00200	99.6938	80.435	83.012	143.13	160.643	133.954	147.198	150.475	142.232	159.444	143.033	88.9263	117.249	109.224	104.632	79.4478	87.2042	84.9622
VIT_14s0083g00640	171.842	137.984	134.69	78.4224	51.5063	67.1833	385.555	326.669	325.88	4.10043	9.71745	55.659	72.4479	75.9269	59.3494	65.5983	45.6777	46.4783
VIT_01s0011g05230	222.378	268.854	276.524	92.8558	108.75	123.296	102.283	102.212	104.046	70.0811	77.3951	185.374	28.1524	43.8131	47.1243	73.4433	52.3867	135.266
VIT_11s0037g00520	183.499	179.719	182.304	110.574	118.89	118.925	99.2394	95.0295	89.9413	95.6735	103.988	105.722	108.984	119.347	110.632	110.809	98.0397	82.8776
VIT_12s0055g00020	88.4575	54.3889	75.3814	94.3084	145.039	130.541	25.4843	35.884	44.5505	175.797	240.8	181.865	79.4483	128.034	140.244	210.448	128.261	135.203
VIT_07s0005g02130	179.889	102.993	127.763	73.2159	75.0795	86.7997	70.9072	83.7992	96.1255	95.6285	93.5074	111.103	153.901	174.798	190.475	179.507	111.569	105.94
VIT_16s0039g00200	110.844	188.294	165.002	119.103	144.483	149.08	64.5638	62.7499	58.3096	81.6413	171.798	163.383	99.7101	136.237	144.958	84.0191	98.2451	70.0639
VIT_08s0007g03240	298.421	272.001	328.706	34.7782	37.2364	73.9415	182.466	147.889	153.936	18.8771	36.2009	34.657	34.5	22.5264	43.8159	159.48	161.567	68.2563
VIT_18s0001g10100	161.154	175.852	177.74	142.321	150.674	166.9	79.731	84.7864	79.2506	84.3607	111.113	175.889	68.383	99.1411	99.0298	67.1439	77.1766	107.93
VIT_12s0028g01410	92.7452	86.3655	104.922	57.434	69.1083	74.561	33.4696	44.742	39.2325	205.744	149.242	319.711	92.8428	120.564	99.8693	183.589	152.026	181.936
VIT_18s0001g09910	37.5166	57.0443	46.4784	1.84564	2.8011	16.2467	20.3575	14.1716	10.4171	90.3325	134.274	844.477	101.474	85.8571	129.505	109.979	82.1387	322.936
VIT_18s0122g00810	150.342	222.664	182.188	134.587	133.487	135.598	49.8559	48.586	45.8804	97.2747	145.88	172.468	106.067	149.563	147.83	63.357	64.9523	56.7619
VIT_14s0060g00280	82.8348	135.169	98.3395	87.1226	88.2627	79.9566	71.8871	64.4589	70.9337	80.5617	216.538	310.093	114.52	152.153	172.338	52.8863	103.304	118.288
VIT_04s0008g06880	100.368	144.917	132.376	103.877	121.578	122.35	73.4795	76.2014	73.7122	118.363	146.274	198.14	102.258	138.063	164.77	82.4551	97.1765	97.5175
VIT_02s0025g04350	111.587	114.267	87.7863	191.479	227.145	180.615	40.7294	53.739	47.7462	149.716	202.317	262.612	46.7285	88.6911	83.8568	47.6681	66.49	88.7869
VIT_08s0058g01090	122.312	131.328	137.019	58.1993	60.1137	70.2241	189.924	196.134	196.54	169.478	152.142	100.979	64.4104	87.4035	95.9196	86.1255	58.8587	110.331
VIT_06s0004g02830	50.0995	45.8731	44.807	19.1567	17.709	21.0798	416.122	366.41	426.47	34.7386	17.3766	48.2939	65.7202	119.991	109.831	145.712	69.3079	67.3619
VIT_05s0077g00430	3.48616	7.18015	5.94066	6.97223	3.49218	4.80054	38.9851	17.7655	34.3363	137.754	78.1388	564.09	21.9971	40.2435	115.638	51.3246	124.595	829.192
VIT_14s0066g02560	81.6565	110.331	89.082	100.393	110.52	100.878	51.9371	52.0418	54.6414	139.033	181.969	191.798	162.431	195.222	190.082	88.9102	99.7014	84.1763
VIT_01s0010g01130	51.9073	52.0814	51.6131	139.62	170.333	140.334	85.2916	88.7298	80.613	325.947	236.21	148.519	87.5496	92.2786	109.707	53.6065	79.5658	87.4008
VIT_04s0008g00820	150.042	97.7089	103.118	132.96	139.814	127.549	162.95	142.382	142.354	109.862	91.8059	66.4513	88.2043	78.4503	74.1479	131.791	111.793	129.415
VIT_13s0019g03640	109.568	177.933	138.808	73.5081	90.5186	68.8882	60.1622	63.0522	54.2987	77.1036	181.68	270.728	124.496	182.753	193.436	64.2976	70.1699	78.7277
VIT_01s0011g04510	62.4741	63.4192	65.1687	210.845	279.826	229.367	54.6051	65.1716	56.3023	190.238	155.234	86.7947	62.5831	98.1165	92.1714	89.6493	107.606	107.431
VIT_04s0079g00530	87.4273	90.6599	106.534	137.382	124.345	120.345	97.3092	109.015	121.652	138.351	97.0369	148.713	138.584	132.771	165.134	58.9816	91.0421	110.995
VIT_18s0001g14480	21.7542	30.2369	25.7749	248.069	329.368	216.233	17.0945	18.2641	16.1743	286.956	432.951	232.73	27.2697	44.6419	35.524	12.5982	20.9076	58.8836
VIT_00s0264g00020	59.3532	57.4528	54.6092	69.0229	87.8133	76.3927	31.1484	37.566	35.4178	319.758	402.799	317.725	75.5322	108.621	93.1519	71.167	80.2577	95.9623
VIT_11s0016g04050	62.2139	61.0753	46.9318	22.4924	22.7004	23.7156	33.4502	42.6506	37.245	84.9682	313.309	388.215	74.7431	129.491	149.538	214.182	182.3	182.027
VIT_02s0087g00750	1.64502	2.57484	4.18192	66.6491	76.4934	83.0049	10.8979	24.9327	29.3412	342.691	341.375	523.422	31.971	65.9645	92.2006	72.0744	69.3804	229.901
VIT_06s0004g03100	53.5191	45.5829	41.6775	44.4158	60.1381	44.552	20.2198	22.0068	21.7911	555.568	451.758	208.194	37.8126	51.0453	36.8849	116.974	130.998	121.495
VIT_19s0014g01680	73.6644	63.5651	66.0889	47.4406	53.8275	46.3694	105.91	88.7537	89.7831	93.1945	88.3764	176.438	171.55	169.733	130.921	212.95	148.17	237.2
VIT_12s0059g01340	108.068	96.6882	111.839	26.8959	29.9963	39.9516	22.6714	35.9184	32.8584	157.796	145.168	262.383	114.519	120.478	135.427	160.143	248.96	213.943
VIT_02s0025g00130	72.6158	94.2179	81.1031	120.168	140.151	114.431	89.653	109.502	106.049	157.761	163.834	133.067	96.7798	105.848	129.048	109.439	143.346	93.6421
VIT_04s0008g06780	204.549	167.573	172.544	53.8842	61.8154	63.3816	150.244	121.021	126.444	45.6711	65.2729	133.715	84.8698	84.396	72.9882	182.415	130.713	137.654
VIT_18s0001g12750	111.577	108.123	110.143	143.401	150.192	131.754	89.7834	83.7115	78.7405	115.531	151.541	132.167	99.801	121.981	155.05	79.7291	93.4803	99.7831
VIT_17s0000g09190	127.391	130.858	181.004	36.1052	32.0532	66.0175	111.06	116.815	130.231	91.8257	79.8224	138.794	116.689	154.42	141.057	140.456	132.074	129.436
VIT_19s0015g00980	127.418	130.867	129.329	154.305	168.038	184.81	93.0711	79.6721	98.6833	130.552	109.307	128.404	86.5555	99.8254	104.313	70.4106	75.2584	84.5857
VIT_08s0007g01360	101.688	87.978	80.475	290.46	414.604	296.047	117.132	114.696	106.208	97.7452	98.2644	64.3107	19.0509	35.8851	53.7676	14.2443	18.4142	39.4294
VIT_06s0080g00160	85.3304	78.4445	66.7474	180.239	199.798	169.19	87.4567	90.1719	92.6997	206.47	172.092	118.144	80.2172	78.5268	80.2201	82.8788	90.9518	87.6673
VIT_13s0067g02870	86.1914	174.582	131.474	47.0849	42.6173	52.2618	56.2765	65.9996	79.3478	69.5028	77.1874	129.869	60.0516	73.7101	122.741	104.249	224.827	448.543
VIT_19s0014g03510	75.4758	69.029	64.3531	133.026	146.945	128.806	49.7922	48.1079	50.6517	304.558	283.059	168.22	79.8873	92.2563	86.378	72.4471	89.2084	102.911
VIT_11s0016g03210	152.802	131.727	125.766	124.399	113.854	109.576	120.121	123.921	128.821	69.4586	74.0565	108.683	148.968	135.295	127.516	70.0263	96.2143	81.5852
VIT_06s0009g01840	66.4732	48.3973	53.9046	129.978	155.422	129.699	173.186	132.678	146.386	88.5472	122.9	98.0185	91.4787	97.3652	74.5268	152.365	119.431	160.38
VIT_09s0002g01740	90.9497	89.2669	89.9686	150.317	164.254	140.519	94.1163	90.1198	96.8056	162.962	148.277	132.825	94.7778	90.3499	98.3288	87.6327	96.4659	117.667
VIT_02s0025g00090	98.5825	84.1727	84.5566	166.368	198.778	163.312	88.7398	87.7055	74.6341	113.886	167.318	88.3315	113.242	129.244	112.13	103.606	88.6447	72.0733
VIT_08s0058g01040	137.655	134.819	130.512	62.3516	65.4879	73.011	71.2536	71.1109	67.7524	160.442	178.026	136.881	71.9326	73.3146	66.2271	204.616	168.653	160.663
VIT_02s0025g02920	22.0615	18.9664	17.7005	59.0458	79.8153	81.0639	15.7925	14.7215	17.1791	160.719	183.287	555.462	57.7746	136.205	160.082	41.1947	52.4732	360.755
VIT_13s0064g00840	91.6976	74.5385	73.7687	45.1885	43.328	46.6127	94.6053	76.3637	84.3016	95.2549	89.4239	208.451	116.684	101.093	86.5533	217.299	194.403	292.458
VIT_18s0001g08820	62.1768	56.272	60.8911	10.5211	11.2027	17.8238	5.4214	8.22145	8.41502	224.553	244.64	356.72	121.115	194.025	176.938	224.2	115.225	131.349
VIT_10s0042g01250	83.7285	65.258	65.5094	155.005	192.709	166.302	41.2557	46.9895	42.0705	255.633	203.925	112.273	89.3868	99.498	73.3113	137.091	115.711	83.5485
VIT_18s0089g01210	178.97	200.462	161.923	58.1799	60.2096	66.3598	131.746	126.027	108.697	15.4358	27.2981	43.1789	65.1529	79.7928	53.6835	316.039	218.666	115.759
VIT_17s0119g00070	144.063	112.208	117.891	125.427	153.32	126.344	104.359	96.9729	86.6962	134.447	129.444	107.783	82.6024	86.416	79.2954	116.892	112.463	109.382
VIT_18s0001g08250	100.827	149.716	153.396	108.072	124.578	102.973	36.1163	39.7256	39.4924	108.766	126.423	81.0846	248.613	227.346	213.454	59.2039	70.5617	35.5076
VIT_06s0004g04340	113.86	102.396	100.099	101.835	110.727	97.5821	83.7317	81.4261	80.5189	133.003	157.016	142.61	120.257	121.219	126.322	114.285	110.989	124.723
VIT_00s0386g00020	80.8692	145.431	126.764	117.863	139.497	151.405	54.5585	56.5298	56.4465	148.377	184.523	146.01	117.179	136.654	162.46	60.6261	75.4995	60.2099
VIT_08s0056g00710	159.538	251.786	192.156	72.9069	79.8291	81.8818	69.8114	68.8094	63.8692	85.4244	122.411	170.471	92.6529	136.489	157.397	62.5861	72.8194	72.0824
VIT_11s0016g04870	85.9587	81.3859	78.7389	221.847	302.829	233.023	80.7075	83.7715	86.5394	157.658	182.2	63.6175	54.0549	55.4599	53.0794	68.1608	60.9642	62.6854
VIT_02s0025g04180	92.8793	73.5828	61.1484	272.542	338.91	245.865	112.406	91.5096	89.8188	37.5939	67.9069	89.5274	43.9168	68.9538	41.4844	102.213	73.0426	109.161
VIT_13s0019g03860	98.767	147.496	140.718	111.74	116.222	105.249	67.9982	78.392	76.1432	117.219	136.145	164.749	109.691	131.526	151.738	80.579	93.7641	83.1953
VIT_18s0001g01030	117.048	102.826	107.557	60.4383	61.4013	66.651	156.532	137.714	140.013	43.1158	53.8268	255.106	53.3006	65.9574	69.5806	108.048	95.5107	316.246
VIT_15s0046g01510	90.0076	74.1153	74.3703	136.684	153.449	134.3	100.352	95.9198	99.4739	163.722	158.986	122.915	87.0027	101.034	86.9723	106.229	106.438	118.138
VIT_15s0048g02300	140.332	113.103	116.42	67.5925	56.9438	77.4609	87.2184	87.1188	80.1125	159.797	136.357	111.465	49.749	55.1128	45.217	236.357	211.141	178.535
VIT_03s0038g01930	140.855	583.877	298.128	92.1723	78.3136	87.0803	47.9501	47.9644	49.6624	89.2701	140.958	66.7826	22.0284	45.3312	46.6039	55.78	82.2018	31.6918
VIT_08s0007g08280	123.592	141.601	150.186	19.9884	13.6934	38.0941	134.977	161.935	158.906	50.697	70.0584	229.914	64.4705	67.2161	90.2307	128.195	140.965	218.896
VIT_01s0011g03090	1.88278	6.54435	3.45625	133.296	203.337	148.17	0.31982	0.13317	0.068735	664.327	755.133	69.8373	1.17981	2.80031	4.07677	2.22858	2.48554	2.06956
VIT_00s0652g00020	79.4334	72.1397	72.9645	102.057	120.897	98.6499	103.315	107.724	95.7934	81.3555	161.834	222.396	92.4592	128.864	152.04	65.2621	87.8184	154.703
VIT_19s0014g02460	43.1014	34.344	34.101	146.347	187.875	134.863	76.8501	78.4329	67.5837	250.459	151.478	152.355	136.431	101.161	65.9898	85.9028	173.704	77.9532
VIT_19s0090g00280	124.641	118.577	104.415	93.6755	100.833	88.0932	116.845	111.532	121.168	114.009	136.865	171.879	97.4505	105.029	108.689	80.3448	93.2986	111.488
VIT_17s0000g05970	95.0552	110.63	104.281	83.8253	98.7228	87.4023	100.577	107.86	83.8376	123.969	166.45	186.87	107.051	132.558	189.508	67.8033	75.885	76.496
VIT_19s0014g03160	460.589	390.798	437.409	14.2083	14.5954	67.8339	23.5861	22.6559	25.7369	8.50579	7.31418	3.31118	168.03	161.264	143.539	17.1476	16.9292	13.3152
VIT_18s0001g06610	111.071	164.053	147.932	32.1151	36.6757	60.7054	29.7524	44.4374	41.4962	214.341	237.38	213.414	60.2781	102.325	122.007	159.474	121.633	97.0632
VIT_15s0046g03500	48.885	91.6569	85.8961	69.0309	80.906	123.305	39.0354	47.0071	37.4663	193.161	300.651	433.154	49.0052	88.2653	79.4148	92.2882	91.7217	45.0438
VIT_17s0000g05680	95.6846	94.838	92.0742	106.85	93.4856	87.3915	154.919	184.377	167.084	94.4691	72.0194	66.6598	133.561	139.976	134.422	95.5783	131.092	48.7005
VIT_08s0007g01690	106.771	91.2356	95.6117	38.4571	43.518	46.8448	28.7708	37.5559	37.9624	178.497	155.406	185.015	112.64	148.381	152.267	171.208	235.728	127.138
VIT_01s0011g04020	139.343	148.518	136.854	71.9621	64.7117	63.6656	143.102	129.131	107.781	38.6503	70.2178	187.679	121.672	146.01	131.292	104.99	90.4055	96.5151
VIT_07s0031g01530	42.2791	48.4659	40.0247	38.509	43.4794	43.7431	61.0515	57.7144	59.0239	124.572	181.142	630.765	70.5333	87.8262	95.241	63.5339	68.5497	235.865
VIT_09s0002g04220	95.1575	110.673	92.0924	117.952	117.997	110.462	69.7016	79.7199	87.7055	127.627	131.472	169.953	121.585	130.88	135.931	75.6265	91.6453	123.469
VIT_07s0104g01300	60.8926	97.2229	73.4118	148.424	155.141	103.322	91.2386	94.1259	95.1884	102.03	179.765	147.133	130.049	148.98	154.724	43.0721	82.4025	82.4203
VIT_13s0084g00670	116.516	120.945	115.607	17.9079	17.2184	29.715	97.0015	116.705	117.266	41.9104	116.384	370.765	22.727	78.144	145.511	109.096	77.4294	276.359
VIT_07s0031g00640	162.277	128.913	129.619	149.695	191.468	172.954	135.414	119.207	121.866	85.7159	85.7515	42.4601	71.5005	79.4533	54.4443	90.9734	76.1764	85.0072
VIT_01s0010g02940	261.898	325.198	331.342	2.80623	4.78477	36.9197	34.2497	39.122	40.4848	22.4342	55.0082	254.564	61.1964	119.113	169.244	84.0838	53.519	84.7817
VIT_02s0025g01240	107.661	141.892	138.277	123.362	161.157	121.59	7.61727	12.2637	10.9255	167.696	127.015	172.065	69.1534	81.3475	88.3965	158.562	216.334	74.4273
VIT_01s0011g03110	145.729	122.309	149.148	117.642	153.939	170.041	122.496	144.634	159.641	51.0824	38.0615	81.2051	62.6215	103.022	77.5318	104.805	72.1415	103.655
VIT_06s0061g01210	27.938	31.6662	31.6826	75.8952	97.5539	83.8314	24.3057	23.666	23.7411	440.822	380.213	129.808	79.1607	84.0638	87.2697	130.593	134.759	92.2564
VIT_13s0019g00330	42.7211	131.853	83.5591	49.1385	61.923	35.7037	17.1433	16.153	16.2253	199.933	413.304	299.585	36.3969	94.2392	182.349	45.3229	113.789	139.044
VIT_17s0000g02900	101.916	96.4635	83.2712	108.501	106.247	84.3735	138.569	132.826	134.554	116.386	110.7	113.816	118.869	90.918	110.945	102.415	115.389	111.386
VIT_17s0000g09370	190.559	122.769	128.773	51.7091	51.0523	55.702	182.895	143.247	139.366	62.3415	42.7756	45.7272	132.814	92.3411	70.6032	229.452	139.674	95.2626
VIT_08s0056g00620	91.2383	95.3781	92.67	121.517	133.26	119.632	74.5592	75.979	76.182	160.025	150.949	176.599	98.5582	120.68	129.351	75.9669	84.2814	98.1263
VIT_06s0080g00420	68.4488	63.1348	72.1971	301.513	411.612	267.128	91.502	79.0564	85.4588	185.84	143.469	23.303	40.1088	41.1187	47.8707	22.3726	16.8329	11.2084
VIT_13s0064g00210	45.2482	26.3707	40.5756	29.3788	88.5562	45.7369	23.7125	16.1723	28.1172	203.524	247.595	118.405	134.944	145.295	87.895	263.52	207.972	218.77
VIT_08s0056g01610	188.61	171.216	159.313	146.082	232.51	165.786	24.3947	24.5477	11.942	75.6336	138.161	114.972	142.355	177.067	117.319	23.2721	37.9814	20.2382
VIT_01s0026g01730	31.6312	32.736	32.2524	16.4196	15.4722	19.4171	5.16549	4.86152	7.47708	404.134	345.77	305.131	114.214	131.365	121.656	113.671	148.73	120.959
VIT_11s0118g00570	49.7836	51.0811	70.4288	107.361	75.3296	71.512	87.537	97.9621	100.005	150.739	128.205	152.999	119.498	142.187	106.632	177.627	165.759	115.551
VIT_14s0006g02830	91.8019	132.366	137.356	118.979	110.309	107.291	96.7236	93.1353	91.4078	122.276	137.696	125.12	91.6549	136.999	158.105	73.4839	87.6991	57.5748
VIT_01s0011g03760	115.75	113.171	112.167	58.6443	88.4436	82.2078	5.10947	9.60343	5.99897	213.699	288.364	269.001	59.2469	97.2654	95.275	96.0153	97.7132	156.604
VIT_01s0011g02720	21.1752	41.6343	49.6486	17.0338	15.81	19.7864	15.7825	12.3537	9.20295	283.369	354.876	767.295	42.1637	69.9458	25.6044	140.667	31.8383	45.9793
VIT_15s0046g02690	107.832	116.621	137.354	76.9123	105.135	107.596	67.8298	69.7368	55.331	123.492	173.909	160.853	103.551	159.395	165.238	73.194	86.4824	73.1999
VIT_07s0005g00670	68.0147	75.9229	89.6093	142.834	171.103	140.656	50.8569	56.825	59.551	141.939	162.07	216.326	89.0158	109.438	133.174	77.4697	83.319	94.2437
VIT_13s0147g00180	89.6493	76.093	68.0949	153.798	170.028	166.721	65.6755	60.4675	72.4018	265.139	321.874	52.6431	85.9829	67.3832	63.4711	57.3029	61.7754	63.4941
VIT_17s0000g09470	15.1056	12.8981	14.8268	104.697	146.653	86.4274	59.5293	59.8316	53.4366	153.416	230.567	184.993	146.518	190.573	143.183	105.236	189.928	63.9897
VIT_02s0025g04440	54.5468	100.665	115.275	23.4079	24.2686	39.9397	1.2473	2.16401	2.55301	215.377	285.889	273.629	129.274	165.144	201.878	52.9174	236.465	35.2564
VIT_10s0003g05330	84.6246	107.385	123.861	32.6937	37.0264	43.4902	61.7936	82.1612	68.9851	129.809	164.906	242.201	78.2576	102.634	140.574	154.598	106.426	194.768
VIT_16s0098g00830	139.223	155.721	170.87	94.4416	106.755	111.875	77.1997	74.8865	83.6154	113.476	118.781	155.372	96.3233	119.149	125.578	71.3993	72.3206	67.5988
VIT_11s0016g03720	66.147	57.3036	62.4346	220.481	212.115	180.603	67.7664	71.8434	66.7806	166.875	225.334	132.423	46.9299	74.8732	71.0892	73.1711	75.1636	80.3664
VIT_18s0001g15130	274.132	206.489	222.142	68.3324	78.1752	96.5618	171.056	221.444	185.352	12.9062	12.881	31.5622	13.9989	21.0743	33.6326	100.246	80.1764	120.473
VIT_03s0063g00310	132.615	101.43	106.225	89.5934	103.702	93.603	157.454	143.11	144.643	26.096	32.7446	75.9618	63.0977	55.5257	65.1863	208.849	140.974	208.264
VIT_06s0004g02900	135.652	100.652	91.8849	84.5889	71.5614	67.8417	142.942	129.678	123.069	150.008	88.0449	87.9676	89.8439	66.6083	58.6548	179.918	150.664	128.917
VIT_13s0019g03970	114.077	113.582	104.084	92.8643	101.154	81.9737	100.306	101.438	90.4133	120.735	155.023	154.604	110.063	123.718	142.428	78.4962	87.1462	76.1297
VIT_07s0005g06420	70.5889	84.5585	76.3276	312.695	424.343	355.75	26.3742	36.294	25.899	64.1023	64.6042	40.6127	23.6054	25.4012	31.5756	95.6796	95.7447	92.7521
VIT_11s0016g00900	81.9324	61.4785	60.8164	112.027	100.794	97.9277	203.696	179.362	201.683	81.2928	67.9264	110.165	103.434	93.062	83.3267	103.64	81.9722	122.365
VIT_07s0104g00880	144.777	168.726	161.74	110.998	133.951	131.176	91.3714	92.8126	88.6179	83.8864	107.196	91.2886	87.4358	123.666	113.465	91.8177	66.0515	57.8053
VIT_07s0129g00210	160.459	153.945	139.525	87.406	121.823	112.077	26.4677	30.6495	24.7984	176.994	249.647	133.765	73.6575	120.255	140.865	38.1437	83.9254	71.6005
VIT_15s0021g01160	102.306	73.9778	77.6158	129.461	138.888	126.591	119.774	112.153	102.648	173.363	146.325	76.3752	93.4188	74.646	66.3138	118.023	104.834	106.493
VIT_05s0094g01550	83.997	82.6399	78.2656	103.263	103.394	86.6381	119.82	124.984	125.501	112.023	99.0072	100.639	139.643	121.982	130.81	101.529	123.757	102.375
VIT_08s0040g00770	118.042	124.912	130.16	88.6519	84.6229	100.943	84.7746	82.6354	82.0914	75.5304	95.2393	202.908	121.115	124.052	134.068	87.419	85.555	114.929
VIT_13s0019g04710	71.0843	60.9788	66.8535	169.834	214.467	178.919	49.8132	61.0409	58.203	181.58	144.563	124.186	56.0929	68.0187	61.391	123.083	128.197	118.955
VIT_10s0116g00940	21.6394	22.4769	21.5455	303.641	438.808	302.058	3.4776	4.98249	5.08312	222.082	118.301	78.3239	56.5754	63.0754	34.042	64.816	126.746	49.535
VIT_18s0001g09380	84.9172	76.8951	78.5002	35.4017	44.3025	50.7057	22.1686	28.5251	26.9771	202.567	254.091	282.397	91.7432	128.9	97.8328	145.708	155.974	124.91
VIT_00s1553g00010	106.878	83.0171	82.3871	195.734	224.966	166.706	225.566	246.992	248.278	38.5788	34.4057	10.0528	76.2156	59.3237	40.4512	38.1157	36.2895	13.4036
VIT_01s0011g06210	84.3354	70.9299	70.7109	105.822	143.05	116.792	17.3245	22.6544	21.8024	320.389	306.1	195.988	53.8488	68.5776	62.1722	79.2355	83.1945	102.464
VIT_18s0001g01490	162.75	150.06	130.158	116.443	121.816	110.169	114.164	113.772	101.938	45.8809	63.0735	92.0104	120.111	142.482	127.814	74.4151	80.0769	57.9772
VIT_02s0033g01160	120.479	113.996	111.808	161.22	156.853	132.993	143.443	145.317	139.543	58.9973	47.0703	62.4093	65.3173	83.7045	71.7999	107.783	105.467	96.1178
VIT_13s0067g03600	84.636	83.076	85.397	115.073	146.845	120.279	91.3729	89.2495	75.3261	183.245	209.885	102.85	89.2431	103.003	102.477	85.2487	89.8333	66.4361
VIT_14s0060g00630	95.2226	111.86	109.841	94.3364	102.2	94.2628	118.17	133.977	128.855	77.7371	90.517	141.253	93.8936	117.483	152.657	64.6412	95.4331	100.855
VIT_18s0072g00640	125.556	100.027	119.473	124.707	111.115	96.9422	56.8964	56.7451	54.1842	139.7	151.308	153.245	105.838	90.0782	100.47	110.224	99.894	123.376
VIT_13s0019g05250	180.264	121.73	133.736	43.8035	41.8993	54.3327	139.968	110.409	114.397	106.407	86.0139	98.8007	104.382	76.5433	63.3835	161.523	130.247	151.792
VIT_19s0015g02500	152.174	111.322	124.32	30.5339	37.0875	57.9573	58.9307	49.9491	54.5031	72.0138	57.4906	187.938	142.995	117.971	110.789	214.842	141.562	196.671
VIT_15s0046g03030	126.281	95.2043	101.318	61.0908	62.7511	65.0909	87.926	90.9908	89.9222	120.291	80.1531	106	92.6242	93.5438	101.523	203.49	147.212	190.959
ENSRNA049469319	91.6517	123.669	60.5929	43.3337	24.1517	57.2705	71.9552	78.3082	102.628	63.4139	142.78	158.432	100.97	187.55	140.632	181.513	160.216	126.174
VIT_02s0025g02960	12.9108	20.3245	26.6026	145.784	137.653	122.573	2.59922	3.00166	2.13847	265.756	309.802	421.978	27.2437	76.2454	70.1594	31.3321	146.816	88.95
VIT_04s0023g02810	286.089	201.998	192.213	139.389	157.457	158.075	84.6748	105.61	94.7897	44.1886	50.711	27.8514	48.0773	45.1742	29.1377	93.5359	78.1073	72.9523
VIT_09s0002g04020	59.6377	92.3043	80.2737	154.218	163.105	126.771	107.296	117.54	94.4227	79.5413	120.372	57.4708	122.113	130.483	225.824	51.4939	79.5992	46.8959
VIT_13s0067g03160	106.681	183.833	136.227	114.637	125.382	121.195	60.552	69.0143	62.3375	92.2083	181.375	136.36	71.6553	115.815	140.22	58.7097	77.1568	55.0018
VIT_14s0006g00300	109.191	98.89	130.56	98.507	126.766	120.151	147.306	143.115	170.196	67.8778	85.7425	135.122	63.4826	99.9682	95.3638	93.9845	50.7698	70.0852
VIT_07s0005g02000	70.4922	97.8106	90.1681	148.848	164.507	125.942	77.0949	77.3926	77.7259	126.801	156.221	120.398	98.634	104.362	117.437	70.3951	97.7398	79.6926
VIT_03s0063g00180	138.478	115.821	130.35	23.9196	38.4563	42.4003	108.097	109.442	96.5585	146.356	145.898	134.896	81.094	81.5721	73.231	257.709	98.7906	78.2613
VIT_02s0025g04420	58.4433	57.3229	54.2115	163.931	266.657	177.414	3.61365	3.7356	3.02026	295.185	253.136	234.5	50.5506	62.5578	76.6055	33.9428	54.9628	49.4662
VIT_06s0004g01910	75.8344	124.861	89.047	126.919	120.514	113.993	82.4413	90.4087	78.6522	249.744	178.043	103.693	86.4691	94.3877	118.693	42.403	74.8278	47.5628
VIT_18s0166g00260	1.4479	3.81488	2.64081	479.852	198.264	277.113	125.499	151.123	312.424	22.5541	12.0858	17.086	21.0489	23.0018	54.9818	35.4363	109.138	48.1651
VIT_02s0012g02120	77.4783	136.772	117.526	104.812	134.462	120.332	66.3068	79.4818	62.346	114.832	154.325	169.191	93.385	123.325	155.381	50.7337	75.2193	56.4679
VIT_18s0166g00180	98.0797	84.9067	86.4661	107.747	115.505	99.8361	93.9964	96.8993	92.8135	138.531	143.099	138.892	98.2805	122.556	116.926	82.4703	78.8338	94.0548
VIT_05s0077g00130	108.324	192.535	157.18	117.422	132.751	158.993	45.548	45.9989	48.9454	103.457	149.958	161.603	73.9156	118.854	126.429	46.2436	53.2338	48.3622
VIT_08s0040g00030	99.9666	137.848	117.034	122.986	133.081	147.803	74.6919	68.5805	70.7951	121.459	151.084	128.819	103.808	140.439	112.389	51.3294	59.8922	47.0973
VIT_09s0054g01750	322.583	363.629	343.44	38.1966	33.3037	77.0923	122.862	103.751	88.0677	2.48612	4.07929	14.3214	30.2958	22.264	10.6311	150.694	91.952	69.4489
VIT_02s0012g00080	105.748	138.247	114.126	122.235	120.802	118.067	67.7938	59.1653	61.4557	101.87	159.385	156.45	85.8181	120.488	113.447	79.6955	76.5827	87.5754
VIT_18s0001g03830	215.762	193.375	185.237	76.7686	75.2865	79.5732	104.291	95.1229	89.6399	43.263	62.6678	95.574	66.042	67.7167	65.8742	137.877	110.606	122.009
VIT_18s0001g12730	96.4004	104.061	107.485	90.4711	92.254	82.6842	89.8125	96.8263	90.4765	113.097	120.225	120.149	133.599	134.91	143.939	90.4445	102.04	77.0515
VIT_07s0005g00950	77.9877	84.904	71.4081	150.62	193.064	159.886	47.5023	47.0356	40.0605	226.217	257.328	155.543	42.1303	61.4917	50.7187	58.5409	55.8459	105.316
VIT_11s0016g02050	80.7905	69.2147	77.2957	138.792	170.303	156.612	78.6192	71.2262	69.6044	182.52	149.352	126.133	81.2718	89.4664	88.5695	80.4255	87.1635	87.9551
VIT_01s0026g00980	143.729	130.786	141.537	43.882	41.7954	46.5877	62.68	71.9056	70.5051	134.631	261.492	87.0011	107.125	119.329	127.476	115.647	107.591	67.4999
VIT_07s0141g00770	232.745	279.185	263.382	159.615	189.167	187.221	30.8584	34.9752	29.5847	35.8959	58.1125	62.0339	50.6039	66.812	68.8257	44.3241	52.8534	33.7735
VIT_14s0060g00900	361.707	373.789	275.402	76.5669	88.046	117.818	70.2424	81.9405	78.4188	24.9743	28.708	43.431	36.8812	52.9657	55.8349	24.6569	41.1953	46.7669
VIT_17s0000g07330	72.1391	73.2422	77.6379	47.9807	53.6338	54.2383	49.5505	49.1224	41.7065	125.156	157.136	203.114	175.844	221.092	226.991	83.7804	82.5361	84.2307
VIT_14s0060g02070	33.8352	42.6475	34.723	210.966	253.226	180.859	7.02249	8.2198	9.1112	315.376	351.549	136.108	33.427	56.9212	49.1019	44.4565	53.4258	53.5212
VIT_08s0007g03020	113.23	153.957	128.28	137.673	165.932	156.127	67.4128	82.3597	62.8134	92.9513	119.422	112.87	73.5801	105.007	127.569	56.3719	62.6196	56.1966
VIT_13s0064g01280	110.171	85.6206	88.2982	142.381	180.385	153.454	123.434	115.176	120.288	96.9188	98.711	68.668	64.2943	75.0965	62.7927	93.1227	83.6312	110.082
VIT_18s0001g00810	126.269	131.694	133.818	85.487	87.2094	66.6962	55.6188	57.8215	60.4761	52.799	61.1592	136.633	169.167	167.326	163.118	116.669	98.6275	99.808
VIT_00s0153g00050	38.2898	58.972	80.9664	211.62	222.743	234.143	119.298	116.334	146.51	113.096	109.345	67.0947	67.2639	89.6492	111.04	32.7485	30.4642	20.5129
VIT_16s0013g01920	149.018	131.029	121.922	164.324	166.505	188.805	34.9246	47.3469	37.5668	235.894	165.376	102.377	31.757	50.8371	33.4695	69.3688	79.4211	60.0413
VIT_04s0044g01850	105.843	97.5574	72.8158	82.3677	90.2837	67.0522	73.272	63.3106	62.8965	147.701	248.034	187.905	58.7046	86.8891	96.8111	87.4264	78.4363	161.64
VIT_09s0018g01820	69.6376	64.7878	60.5356	90.1945	122.554	86.0723	31.8401	34.2671	32.3748	246.074	261.039	192.674	66.4687	72.2235	63.8053	108.875	134.697	130.471
VIT_18s0001g08310	50.5528	61.0467	55.0656	69.3477	67.0393	50.791	43.7136	48.7768	40.0447	179.61	289.87	93.9312	79.3052	67.7059	72.6559	227.415	177.965	193.318
VIT_00s0434g00020	42.9678	50.134	44.1265	154.152	158.518	117.114	45.4423	45.8982	45.0217	233.511	265.063	155.073	77.3649	101.083	82.6246	75.9037	81.5995	91.6681
VIT_09s0002g06870	113.781	96.2956	111.065	89.7643	104.45	105.619	108.101	109.617	104.57	112.33	78.4052	123.536	98.4949	95.4885	96.0021	109.969	106.368	101.711
VIT_16s0050g00090	107.2	102.003	113.958	91.0104	101.484	95.3553	119.171	117.801	126.25	64.2708	61.6155	113.871	62.3404	62.4008	63.7039	142.56	130.677	187.627
VIT_14s0068g01950	207.7	202.889	219.078	60.1818	68.3379	81.6594	77.2281	77.4797	77.4426	38.2041	56.3287	60.7982	114.088	121.967	110.848	131.456	93.6475	63.7603
VIT_04s0023g03130	97.1619	105.017	111.199	161.259	136.849	130.332	158.249	152.807	174.504	24.8435	28.3363	39.4803	146.526	112.287	111.134	73.772	43.8991	53.4004
VIT_03s0038g03860	217.831	227.759	184.219	116.359	97.3261	104.285	56.7848	50.5925	60.7062	30.6859	48.6762	37.4544	209.965	131.505	130.398	50.76	71.979	33.2539
VIT_00s0203g00040	103.643	114.64	116.048	141.522	140.562	137.623	70.819	78.9742	78.1461	94.5637	104.069	110.685	108.988	117.146	119.115	67.1724	78.5205	76.6496
VIT_14s0006g00910	183.206	120.928	144.08	85.9165	88.9166	88.6838	130.193	107.172	99.5643	36.8998	43.36	44.8847	57.4843	45.3621	34.2943	234.378	163.021	150.139
VIT_05s0094g01400	121.171	133.555	119.693	119.029	124.868	118.888	91.1736	93.62	76.9674	69.1387	75.8617	128.604	112.298	129.626	126.05	57.2945	77.3649	80.9559
VIT_14s0060g02320	10.7826	15.1245	18.8221	33.2219	19.5835	30.67	2.17539	3.75309	4.28297	499.319	307.556	378.604	83.6171	96.9613	68.9268	76.2663	83.3859	121.688
VIT_05s0124g00360	95.9574	96.4632	95.4032	115.73	120.758	107.312	81.7244	75.6688	84.0199	133.259	145.458	137.276	100.154	105.949	108.356	75.2888	80.6358	94.2586
VIT_04s0008g05030	91.2667	100.817	88.4901	133.115	161.921	132.905	59.299	54.2236	51.2069	159.448	198.614	154.113	71.3165	88.5137	104.054	59.5077	59.9301	83.19
VIT_03s0038g00890	97.5286	209.674	168.183	124.407	150.51	144.675	43.6092	51.3173	44.8245	99.8216	121.704	153.226	69.9452	100.912	133.359	35.3896	54.142	47.9273
VIT_07s0031g02630	92.1434	95.1991	103.582	25.8688	23.9273	33.2292	71.8041	67.7948	77.1069	184.613	146.337	138.308	96.5939	94.0226	86.1671	189.151	166.956	156.846
VIT_18s0001g02550	186.8	156.563	183.971	44.5617	45.185	59.6175	76.0468	70.55	65.535	76.9726	77.9648	52.5573	134.442	119.158	98.9353	177.833	139.211	81.8451
VIT_14s0030g00440	148.813	143.021	134.358	132.883	142.394	127.273	85.9959	81.0185	79.7495	64.7608	95.837	47.1724	111.897	117.22	81.3314	114.88	73.5155	65.1248
VIT_01s0026g01590	103.69	98.932	117.609	110.2	121.631	121.261	193.695	179.471	173.843	25.9284	28.6477	62.7354	98.0829	142.522	159.062	34.7208	36.7206	37.1408
VIT_08s0007g01670	109.751	155.533	132.658	92.4375	88.0875	84.7453	53.496	48.0623	51.9253	108.204	169.162	189.816	94.2757	124.094	138.795	68.239	72.9643	63.3101
VIT_03s0017g02000	24.8883	18.5908	23.3435	35.7374	38.5756	51.4816	17.1408	32.1871	42.0131	227.209	138.126	173.125	126.065	159.281	185.556	234.278	159.01	157.906
VIT_12s0035g01190	97.1353	91.4838	79.2518	86.9626	102.557	77.5682	71.1553	76.7295	79.3987	146.516	233.882	104.809	97.9067	96.4147	89.7803	111.378	128.339	73.0259
VIT_00s0252g00070	80.9796	74.7507	81.6681	114.205	123.527	109.092	83.3401	79.5985	79.3147	161.578	135.744	139.876	98.6519	109.873	126.96	79.0502	82.0187	81.7008
VIT_09s0002g03610	101.836	96.7249	101.594	67.6358	61.965	71.4471	134.103	129.303	133.617	103.306	101.891	144.481	60.9803	81.4638	71.3991	135.041	105.678	139.021
VIT_18s0001g09130	74.1347	76.876	83.3728	39.3846	37.0443	41.02	52.5365	66.1615	59.8509	119.434	143.135	224.196	79.1102	102.675	114.044	199.951	150.704	176.667
VIT_07s0005g03360	116.074	129.241	122.313	55.2589	63.9953	63.3236	59.1121	64.3111	55.9602	121.704	118.432	126.731	149.525	152.03	183.958	89.7667	94.2348	72.9353
VIT_18s0001g03850	174.08	169.724	192.924	73.2241	83.2848	87.0862	85.9115	71.6848	75.6796	75.0964	75.9881	98.5503	103.782	93.5594	89.3031	107.458	102.391	78.5617
VIT_03s0038g00690	240.217	260.863	247.621	71.4049	59.6086	89.5123	123.612	111.545	103.133	12.8893	22.6831	34.845	40.507	33.707	33.439	148.806	118.805	84.8718
VIT_02s0025g00640	90.3165	104.276	99.5051	147.289	199.929	141.615	76.1582	77.6082	72.7237	76.6444	120.037	124.153	83.5924	86.0789	90.1122	73.5989	79.4743	94.5451
VIT_12s0034g01780	108.005	83.7223	83.7538	123.607	164.708	128.59	149.803	126.758	141.559	58.8368	71.4032	59.5706	82.9426	89.0994	71.3882	121.086	87.6937	84.1913
VIT_10s0116g01660	62.8463	49.3021	66.3037	116.671	102.67	95.2342	35.2536	42.5469	33.9807	108.21	75.3419	102.954	174.145	228.101	424.462	26.0047	40.3019	51.5446
VIT_11s0052g00950	112.142	98.8062	94.1907	206.075	223.711	172.091	97.286	74.4337	84.6107	55.6447	71.4937	51.8172	88.3218	80.4873	84.2529	88.628	75.789	75.3629
VIT_03s0017g02160	122.797	98.7157	99.4531	166.348	179.157	162.68	118.291	108.062	97.9196	100.206	107.32	70.4469	55.4742	59.6863	58.9515	74.5976	72.9286	81.6821
VIT_17s0000g09280	71.2171	52.536	52.5651	102.565	79.72	77.8425	175.082	162.536	188.635	95.3281	44.2077	71.2255	142.375	85.2479	90.901	95.844	109.968	135.004
VIT_09s0018g01780	240.251	233.131	225.478	44.6711	46.0032	57.452	122.738	105.335	100.306	72.8585	75.0089	68.4107	79.0063	72.2561	57.7155	92.0697	74.44	65.0875
VIT_18s0001g13600	25.4053	19.197	16.0299	17.3416	24.3194	30.3808	10.448	8.98464	10.2511	192.217	261.351	293.684	77.3941	102.557	115.378	222.992	170.101	233.468
novel.394	70.1806	49.5047	49.1428	30.1967	30.3117	38.3508	109.03	111.657	99.6666	30.5113	33.5563	62.5734	142.962	120.583	130.009	261.404	216.735	244.805
VIT_17s0000g05850	38.8665	30.5261	27.0056	61.2748	52.374	54.3377	24.8148	29.5387	32.3797	233.181	166.083	91.4604	165.266	178.913	97.3463	214.363	188.782	141.895
VIT_11s0016g00970	101.687	138.969	126.335	93.8433	97.4263	102.292	62.2428	61.2564	62.7964	109.403	157.148	166.84	95.5842	115.319	122.557	66.1203	71.7725	76.1036
VIT_02s0025g04320	78.7813	122.924	94.2528	56.6781	65.1804	57.9317	32.2734	37.6568	47.0031	156.418	243.866	204.214	72.9901	123.401	123.141	106.207	124.31	80.3239
VIT_18s0001g01080	120.412	135.139	118.997	65.6427	57.7244	66.3824	47.0692	58.0949	46.1223	78.835	125.472	157.494	101.483	122.403	128.908	133.794	133.32	129.607
VIT_06s0004g04020	92.0848	138.498	117.242	68.2355	80.2387	73.5028	55.4369	60.9596	55.3767	106.72	151.381	172.851	115.341	167.62	196.769	51.8172	64.2826	54.1695
VIT_02s0025g04580	36.0683	40.8878	33.8768	82.9851	81.989	54.5212	78.5081	108.073	99.4712	323.287	425.08	86.3349	43.0498	52.5686	70.6653	62.4149	86.7572	54.1405
VIT_19s0014g01020	47.2794	49.2713	46.9034	112.132	132.464	93.7042	71.5767	72.5899	69.7976	209.055	203.697	125.989	107.149	90.6441	114.874	82.0604	92.512	97.2243
VIT_00s0463g00040	19.2546	17.2036	16.5714	25.3094	32.6374	23.1103	2.20993	1.84038	2.37476	127.384	140.527	146.13	166.91	193.878	138.748	259.588	212.344	292.06
VIT_16s0098g01170	50.0748	52.7291	54.7665	15.589	14.048	28.8942	44.3958	26.6778	22.9985	7.18913	13.9861	389.808	282.353	405.505	218.994	33.255	16.1549	137.196
VIT_08s0040g00010	166.017	123.572	120.284	80.1675	97.2735	89.7812	43.8256	45.653	46.2769	107.131	117.807	77.9244	141.907	116.285	109.032	114.369	126.47	90.5176
VIT_01s0010g03380	100.15	122.546	131.803	86.2016	86.449	76.8064	73.3162	65.7519	70.293	72.6821	163.263	150.916	96.9058	146.506	187.306	57.8377	75.6697	48.0768
VIT_00s0323g00040	270.367	276.463	275.898	87.6993	102.147	116.765	51.3562	53.5124	40.9744	59.4979	63.3471	60.0558	59.3038	69.1912	63.1919	60.3019	58.9454	42.606
VIT_02s0025g02140	59.3621	54.6065	55.1603	170.884	204.657	163.783	93.1291	110.446	98.886	144.055	73.9676	81.4445	86.5561	81.7907	102.459	59.4358	70.8537	98.4006
VIT_06s0080g00540	131.214	188.375	160.16	99.4183	90.6969	118.048	48.3664	49.1924	57.7158	86.9974	109.177	161.31	83.1286	126.224	135.059	43.9505	58.914	60.4476
VIT_12s0057g00530	96.7496	75.6912	87.7636	59.3172	72.9151	65.4899	69.4009	66.2782	67.1131	132.173	119.514	144.222	91.1115	107.947	102.022	156.009	131.019	163.116
VIT_09s0002g00700	39.3337	43.5779	41.3576	90.236	69.1064	59.2735	265.105	324.741	375.134	37.434	37.8418	40.1183	76.999	119.715	109.729	20.3926	34.2043	20.525
VIT_17s0000g03510	88.9119	74.3202	70.0662	114.382	126.063	109.191	34.6154	49.2552	47.1331	106.342	152.983	250.173	36.479	67.9312	61.6944	96.7091	121.817	196.382
VIT_18s0001g14670	133.586	119.515	112.587	138.293	158.066	114.478	63.417	61.446	62.0983	100.871	129.662	101.849	75.652	69.9987	66.0256	110.27	100.702	82.9665
VIT_08s0058g00150	51.2966	57.1505	56.7964	87.7941	149.037	116.831	17.3696	25.0862	19.7776	327.532	329.196	301.783	24.1207	36.9798	34.8793	43.0121	57.2282	63.8076
VIT_03s0091g00470	83.71	78.9957	72.0517	57.108	72.4946	65.1726	29.1145	36.5699	32.9801	258.727	238.625	180.447	86.9781	101.931	99.0014	89.349	106.751	107.732
VIT_16s0050g01090	273.573	251.481	248.113	67.2635	54.6362	69.4718	86.3076	79.1659	69.2991	4.07544	6.52404	54.4118	62.5642	61.9989	44.7103	165.042	103.659	94.4816
VIT_18s0001g05040	237.07	410.173	361.495	18.8594	20.9303	56.7633	14.6971	15.5907	16.9215	37.4073	73.0247	56.861	124.265	139.14	120.436	32.2217	42.112	18.2895
VIT_01s0010g01430	23.6645	23.4276	22.5905	178.524	225.632	176.404	8.95044	8.20058	8.33312	464.086	432.626	66.6106	14.4247	20.3629	14.5363	46.6059	33.7509	25.7338
VIT_18s0001g15660	44.5862	41.207	44.0356	82.7803	81.5755	71.8127	126.264	135.283	127.333	44.9113	46.2699	115.853	134.284	239.208	255.78	45.498	78.1143	77.0081
VIT_03s0017g02170	99.5971	90.6071	93.2815	70.6474	66.6067	69.0199	112.641	168.289	133.848	117.926	71.984	78.6109	120.456	88.8874	93.1306	99.1902	121.369	95.5934
VIT_01s0010g03610	97.5724	135.576	121.078	76.6105	90.1935	85.2996	64.7457	70.9364	64.3312	78.883	154.692	186.265	90.094	113.702	134.456	63.9748	91.6317	70.9201
VIT_14s0083g00260	403.227	534.239	529.153	1.06703	0.0730983	63.0513	12.6512	8.47054	7.53139	15.7176	17.5355	68.5785	13.3771	26.3088	20.2839	15.077	32.7317	19.8826
VIT_00s0259g00110	111.825	104.595	134.105	42.8325	57.3631	68.0908	54.4704	39.7109	43.8255	87.8953	77.0089	193.528	104.861	117.214	123.207	171.404	112.491	143.625
VIT_03s0038g00860	111.916	100.023	96.6165	73.4995	71.7049	80.6476	69.8714	73.3813	73.6396	108.265	83.0714	88.7424	119.194	114.434	111.382	144.273	143.422	121.605
VIT_08s0007g01040	230.839	202.227	202.989	86.3921	87.4349	96.9924	88.1181	66.365	79.7293	41.3752	61.6677	31.4115	100.056	115.398	96.3024	82.2472	73.9491	41.902
VIT_16s0039g02780	97.6309	120.939	144.314	91.1612	106.462	112.101	63.0246	54.5439	50.3294	118.828	124.889	145.852	84.5772	110.537	126.373	73.6564	76.9782	82.8893
VIT_15s0045g00380	3.04717	3.47257	3.56743	368.761	457.068	318.876	124.198	153.212	169.707	41.7908	36.3798	11.2834	9.17588	18.739	31.2292	5.28562	18.1194	10.7471
VIT_19s0027g00710	72.2046	109.244	117.3	165.631	188.411	147.379	53.1859	62.4454	61.8259	111.597	135.333	115.166	66.5698	94.5662	126.963	49.9476	57.5074	48.8416
VIT_19s0015g00920	91.5402	65.5355	60.5047	158.628	185.746	153.502	137.851	117.469	111.885	70.6729	86.3621	63.2766	74.4906	76.4653	70.669	87.7799	78.9574	92.5258
VIT_11s0016g01230	57.2177	74.2325	54.6853	120.548	165.768	124.872	25.2424	29.8285	29.1899	314.02	371.602	80.8691	62.9669	70.0107	64.7265	42.7041	58.0041	35.9469
VIT_05s0049g00010	83.6198	58.0084	76.7248	99.1057	111.845	104.8	189.105	233.222	209.259	32.9701	35.1564	52.4188	69.1109	78.6867	87.4404	91.6235	99.6095	67.818
VIT_06s0080g00090	87.3259	107.835	97.9741	236.107	322.663	198.048	2.0803	5.95522	4.62617	70.4027	94.7803	196.089	50.5723	67.537	91.5533	29.8764	53.6533	63.0655
VIT_08s0040g02220	98.0025	158.501	135.252	47.8028	55.774	47.0176	40.8282	48.3006	42.4439	103.051	148.242	264.8	86.7783	134.909	137.637	63.22	73.0448	93.0267
VIT_08s0007g07950	68.8077	88.1399	82.6331	119.992	145.468	122.582	84.1562	84.1485	86.8092	108.867	144.076	154.71	69.2666	83.6862	88.0763	73.0467	77.9988	95.8078
VIT_07s0151g00650	89.4795	73.8096	87.7797	124.259	134.421	133.26	91.3338	90.5578	94.0475	128.542	105.178	103.896	93.4667	86.1258	86.1079	78.3629	82.8605	94.4097
VIT_01s0026g01030	116.268	95.3108	110.596	18.9313	20.8006	33.3811	189.485	187.998	180.704	63.4202	93.1298	130.706	57.2393	62.4576	107.796	99.8012	81.8528	126.497
VIT_03s0091g00160	18.0643	43.3835	38.4936	116.447	127.345	119.169	13.9748	28.8471	17.2537	485.264	266.578	60.66	31.1164	29.0462	31.1133	69.4087	242.984	35.5212
VIT_17s0000g02520	96.9947	87.5243	87.5424	55.9977	64.5905	55.4959	24.9365	25.4685	30.9792	174.938	215.432	122.89	114.978	119.661	85.4055	157.594	139.716	114.226
VIT_00s0220g00120	103.11	88.8772	88.4738	67.0145	64.5135	68.0876	82.0277	93.6429	85.4177	88.3212	82.5236	96.7576	79.7452	83.5249	74.278	176.628	189.04	162.182
VIT_09s0002g04680	36.3279	33.3391	30.0498	245.17	319.432	218.086	73.6158	73.1082	65.316	138.757	82.213	54.4312	62.0314	44.6445	48.3041	68.8431	82.4011	96.0736
VIT_14s0036g00420	35.4508	51.9448	35.2367	116.331	160.482	109.95	9.49853	14.3036	8.67101	269.104	374.709	298.219	27.9765	56.4033	53.5125	22.7205	49.7886	75.6265
VIT_12s0059g01720	17.6465	30.8174	24.3751	30.8719	29.9906	36.0563	7.43992	9.31617	5.56164	161.878	313.439	344.61	112.002	207.333	240.324	64.938	62.9757	69.237
VIT_18s0122g00190	119.641	135.809	142.817	68.0465	74.3368	72.2161	78.3751	70.4131	66.2669	88.2812	112.363	128.984	93.1408	113.305	99.8418	111.888	99.1451	91.0425
VIT_00s0415g00070	70.9238	136.258	128.713	132.396	114.458	110.495	87.4554	102.674	107.64	52.8697	80.4146	83.207	67.8377	78.4428	97.2358	106.487	130.912	76.7663
VIT_06s0004g02120	97.0622	71.7179	66.9593	59.659	65.7685	50.524	96.4404	80.303	77.0414	104.961	124.408	67.046	83.6132	52.6049	65.8271	261.961	222.686	116.275
VIT_04s0043g00330	117.653	140.742	124.974	41.6053	31.1617	40.7773	44.3213	49.849	46.8027	61.9649	103.468	277.68	125.662	139.245	132.625	78.7379	85.725	119.633
VIT_18s0041g00730	84.3527	66.9842	69.6228	95.4401	105.117	100.37	101.776	84.0388	85.5044	193.081	145.479	127.36	72.6679	72.3513	72.0199	101.646	83.839	100.081
VIT_05s0077g00410	5.24242	6.87731	6.81943	4.90675	2.43546	3.70975	3.05081	3.86248	3.10116	90.3032	147.829	550.719	163.293	247.732	248.096	63.8173	68.1589	141.189
VIT_00s0313g00030	172.496	171.667	166.769	78.5199	67.2246	73.4464	103.656	94.1868	92.9632	47.2569	57.7768	71.4856	118.845	87.0104	90.797	96.7279	109.436	59.0024
VIT_01s0146g00150	13.3956	10.9705	8.66629	339.778	522.895	424.795	8.97686	8.52317	3.56883	5.85847	4.5221	2.6547	40.5406	70.0309	51.0179	71.399	90.1786	80.6116
VIT_12s0028g02440	45.7405	38.7187	46.0632	96.5861	82.0083	85.751	87.7981	92.782	125.756	41.0054	37.8115	228.484	98.5229	149.973	201.497	22.0525	33.4596	244.024
VIT_13s0067g01840	126.5	102.324	105.245	107.653	123.68	89.0575	99.4835	121.727	91.7872	58.4542	66.7243	44.4484	85.5667	101.663	112.953	154.532	112.848	50.9314
VIT_08s0040g03200	74.9792	79.6114	80.0463	88.5864	96.9173	85.1982	84.2042	75.4469	72.8585	145.898	126.794	92.8782	116.69	110.351	141.069	89.8621	99.1092	94.5799
VIT_03s0097g00600	116.707	100.848	100.97	103.728	128.978	107.685	82.4554	88.9626	86.7462	69.9184	58.1068	122.589	75.5963	72.267	80.4883	108.646	105.423	141.636
VIT_14s0066g01150	4.03003	5.78441	3.51544	148.677	197.575	178.848	9.12751	12.6803	10.2771	521.2	371.224	137.953	27.169	45.1391	36.3272	11.9422	21.2587	8.56065
VIT_05s0020g03450	82.1328	114.158	99.5179	83.3321	87.0524	81.6891	69.7577	70.8024	71.4412	111.47	149.56	138.957	101.546	153.383	156.517	54.717	68.1916	55.8487
VIT_17s0000g09840	126.603	118.721	128.489	95.5635	89.1766	84.4172	98.3291	89.4355	90.1802	65.6748	63.1759	77.7863	139.674	131.48	138.622	73.3084	77.8563	60.3482
VIT_03s0038g02440	108.656	108.29	104.385	21.7903	19.9594	42.4116	56.6603	58.6287	58.2615	33.1577	45.7178	138.523	232.273	331.266	261.752	32.1701	67.8378	26.9372
VIT_11s0118g00250	139.973	116.537	132.801	34.1427	44.0091	49.5307	80.5992	81.2344	81.0637	85.9412	116.096	164.997	61.052	75.8514	89.7912	137.051	93.8874	162.337
VIT_07s0129g00410	94.0526	83.3767	83.1052	105.79	97.1909	99.6256	83.653	87.9943	92.6526	97.0664	106.856	125.407	96.7062	102.537	102.649	92.8855	93.5652	101.47
VIT_12s0035g01130	105.175	98.5428	92.6203	113.397	106.779	91.3572	120.29	100.36	99.4102	88.9214	82.7044	76.5926	100.734	102.349	105.967	90.7193	84.5602	82.0839
VIT_04s0008g03810	90.2876	86.1867	84.7209	147.702	168.566	155.178	58.7957	62.7025	59.4192	162.153	157.984	98.2688	57.6368	64.1392	63.6864	68.3274	73.582	81.8802
VIT_06s0004g03160	97.2282	192.105	137.936	108.594	111.079	110.889	50.7456	58.1854	56.1405	51.0242	126.396	171.692	86.7105	116.056	122.019	42.6398	57.9905	43.4588
VIT_12s0035g00770	76.9283	75.9123	72.619	107.403	124.638	95.9665	44.8765	41.465	35.7213	146.111	206.161	139.181	103.211	121.276	121.2	74.7399	83.2131	70.11
VIT_12s0035g01200	82.5681	88.1518	83.9624	83.762	125.612	89.3682	73.1577	77.1566	83.9381	150.532	211.609	95.2294	82.6005	87.2431	81.9469	90.254	96.5666	56.6826
VIT_11s0016g00210	86.6456	75.934	107.644	69.5664	72.2061	67.037	208.38	220.867	235.337	11.5952	17.8677	73.8884	80.5243	95.0832	96.7078	81.1864	53.3033	86.5428
VIT_03s0038g01780	141.865	140.092	145.596	63.3405	76.6668	83.0101	95.4471	91.1941	81.9766	99.4709	86.5234	76.3461	106.372	116.475	130.472	77.2376	75.0853	52.6234
VIT_12s0059g00660	93.7981	119.81	112.357	113.71	118.866	124.83	70.6684	71.9631	62.8836	107.689	144.56	131.455	73.2324	98.5532	94.8028	58.8464	61.1203	78.4681
VIT_02s0012g00560	89.2317	112.158	98.2689	103.456	109.946	98.2608	71.7632	76.4713	77.354	93.964	114.576	120.063	90.6672	91.2639	109.458	91.9611	93.2406	95.4139
VIT_07s0005g00410	85.7514	77.7522	85.7071	125.98	132.573	130.968	111.077	131.93	131.62	111.35	82.4998	75.3661	79.0935	72.6247	83.2256	66.1123	80.3594	71.3534
VIT_17s0000g01630	97.671	100.63	111.906	160.684	226.359	234.048	7.73566	6.99306	11.4846	62.404	88.9956	133.436	82.9029	144.43	111.446	40.1493	84.6175	27.6127
VIT_12s0178g00200	90.6423	91.4082	96.5245	103.507	104.048	91.8475	92.7834	92.896	93.0052	74.1715	96.8617	121.034	101.804	109.007	104.429	83.9464	87.1327	97.662
VIT_18s0072g00840	115.594	91.4443	101.377	53.7902	70.4886	74.2631	80.7639	88.6707	84.1581	108.273	125.75	160.527	70.7034	95.5304	127.647	88.2803	86.4894	108.346
VIT_17s0000g00920	114.372	77.1115	84.0366	115.648	129.279	104.2	126.876	114.199	104.678	53.8804	49.7598	75.0946	145.686	101.098	88.0246	66.9823	77.3797	102.093
VIT_00s0477g00030	89.8166	64.6382	66.9839	64.8927	84.2084	73.9956	32.8282	29.5133	32.6565	147.279	157.824	186.278	54.4462	57.2045	37.9453	219.009	141.382	186.055
VIT_00s0646g00030	82.5376	80.9844	83.4202	83.7328	97.5932	91.2039	53.3545	60.346	59.6798	125.823	106.054	127.207	113.701	122.903	107.807	105.174	122.366	102.956
VIT_12s0028g03790	78.5138	69.0387	85.5283	44.2108	47.9712	52.4169	98.994	109.496	101.686	113.462	140.725	81.6902	51.5576	62.1496	49.6906	241.324	158.447	139.689
VIT_03s0063g02550	106.085	122.235	126.929	92.3972	105.664	95.3488	81.6624	83.9172	90.4572	93.8656	107.265	120.434	85.4338	92.6429	111.739	63.8516	73.1383	72.7276
VIT_07s0005g02220	537.056	426.65	555.662	2.19808	3.13943	54.6794	3.14413	2.84068	4.46237	0.544009	0.224542	0.608173	50.5067	39.059	14.6725	10.7035	11.5959	7.45617
VIT_01s0011g05590	67.9898	121.825	105.613	119.395	136.937	113.795	51.0948	61.4965	55.7467	123.006	157.067	183.697	65.4779	82.2811	104.877	41.2823	61.3634	72.1524
VIT_03s0063g00880	38.4935	52.2571	44.8791	23.6527	30.1896	33.3632	30.4238	44.7696	49.2964	179.249	202.98	199.224	75.1133	106.278	122.243	156.235	162.619	170.916
VIT_12s0028g01400	74.8858	91.7035	78.6841	106.672	119.775	118.148	57.0506	57.2256	67.0588	146.755	174.002	186.357	65.9334	90.3335	96.6843	53.4908	64.168	72.3874
VIT_02s0025g01340	139.17	157.566	160.607	100.388	110.667	109.286	118.621	107.428	114.451	18.1277	32.8599	55.6456	101.903	118.904	110.581	67.8301	56.6728	38.4982
VIT_02s0025g04170	83.3869	74.8742	73.8264	113.605	124.165	106.56	96.2271	107.843	90.0681	75.6823	92.8482	85.2328	69.0933	81.9782	75.7139	123.109	109.777	134.866
VIT_02s0025g00190	85.8117	62.2929	73.6964	120.725	89.3802	81.1081	116.663	115.009	103.087	48.2453	30.8682	44.7185	133.881	93.7352	75.5783	189.23	124.334	129.155
VIT_06s0004g02980	36.2004	41.766	34.3203	131.71	162.236	124.071	40.4248	42.956	42.2256	270.56	309.969	174.35	40.8474	63.2339	61.1698	23.6544	47.3284	68.8413
VIT_10s0003g02940	88.4777	96.2869	88.9213	183.748	179.545	164.556	62.2084	72.2559	67.6376	107.011	126.004	76.0444	65.0758	68.77	63.6347	71.2289	69.2582	64.8379
VIT_09s0002g00170	76.7215	78.038	82.211	87.9878	85.5857	81.6497	83.7839	86.528	77.4036	143.773	121.611	122.59	99.8121	91.6673	103.321	83.3958	101.96	106.42
VIT_02s0012g01920	90.7622	76.4253	81.591	117.876	109.961	108.826	119.099	113.359	117.219	99.1399	89.5134	78.629	90.1045	79.8026	72.8368	86.8277	92.716	89.3968
VIT_07s0151g00690	99.5602	117.421	109.961	73.0631	73.7033	76.2165	57.4935	61.5694	56.6997	103.983	125.092	153.122	115.002	115.925	143.208	68.3501	87.6279	76.0846
VIT_04s0023g01020	111.916	82.415	79.4213	99.7005	102.617	91.2435	95.3513	95.3171	81.9331	45.0056	36.5997	17.0483	145.978	99.4107	84.9362	209.139	159.089	76.7567
VIT_12s0057g01480	118.531	82.9885	90.5968	44.4174	43.6022	47.6013	88.9842	85.6741	91.0519	72.8976	55.338	104.877	125.284	87.0658	81.551	156.08	117.085	220.078
VIT_18s0001g00190	109.118	76.9087	78.5625	72.1227	68.0278	58.9948	150.152	138.998	130.69	44.9569	25.2117	56.6498	101.794	66.472	62.205	206.962	120.989	143.273
VIT_08s0007g00090	77.2231	168.13	105.516	156.075	165.293	181.932	33.4028	40.2045	46.1765	85.6944	106.238	143.575	57.7606	103.046	101.284	36.8015	54.6972	48.2787
VIT_01s0010g01840	82.7618	64.635	79.4094	131.766	176.049	143.945	73.9622	72.0114	64.7514	57.1499	57.9129	128.359	58.0005	78.9248	75.5734	109.839	101.098	152.341
VIT_06s0004g05070	69.1298	56.5308	55.5922	140.96	120.931	100.43	171.851	218.458	242.952	44.7818	43.4233	52.053	79.6804	59.3686	97.022	33.1929	51.1803	69.2349
VIT_01s0026g02470	115.167	92.031	99.9542	87.7007	121.167	105.843	12.8394	14.9864	14.7023	111.722	125.794	155.67	110.098	173.936	121.604	101.671	78.8101	62.3862
VIT_12s0035g02110	181.644	194.996	184.99	109.496	122.169	133.249	101.722	102.823	95.7048	51.2594	67.2694	68.6744	39.9983	53.1701	52.3804	56.9728	46.4602	43.0556
VIT_08s0007g01630	107.882	111.792	117.368	74.5528	84.0754	70.4352	87.0813	81.4222	80.1787	84.9004	95.4905	59.0004	162.172	108.533	110.76	112.277	85.0684	71.6786
VIT_14s0006g02530	371.53	456.781	291.084	78.2357	83.9492	99.6922	86.3039	92.0458	68.5707	1.81496	7.506	2.61088	9.25644	9.93398	5.34921	13.5886	11.3237	11.4599
VIT_17s0000g07840	136.263	132.659	160.493	67.5516	72.5628	75.4189	103.535	101.743	90.0996	90.5667	91.9857	50.5342	85.4847	78.6889	67.7416	140.265	91.0667	63.8426
VIT_11s0206g00130	76.7272	89.971	86.1173	128.433	145.732	133.616	54.1995	51.8427	55.4525	132.012	127.006	129.27	98.3403	104.468	108.157	49.3783	61.2637	66.5902
VIT_13s0064g01110	80.8437	117.31	108.918	5.47204	11.0629	17.3834	8.12258	12.2885	14.3146	70.9391	192.938	258.558	63.1875	132.108	131.871	168.587	194.097	110.514
VIT_14s0060g01490	19.661	19.6502	30.7618	164.529	212.124	164.095	4.85426	7.07442	6.2596	52.909	59.5307	65.8558	162.988	341.861	314.191	18.2014	13.2612	39.3053
VIT_09s0002g02640	93.0156	146.039	91.1721	68.886	86.2375	68.8544	49.7957	53.9139	46.8495	65.5094	227.051	157.781	76.387	132.386	140.909	54.6418	82.6346	54.5154
VIT_16s0098g01900	105.13	110.539	94.0002	93.9754	78.2213	67.0244	100.034	100.711	106.283	28.6326	47.1979	27.9771	228.515	141.252	135.786	94.0126	107.019	28.9692
VIT_18s0001g11800	83.2881	75.5335	77.828	117.811	118.485	109.384	103.079	92.9997	88.9341	57.6909	63.1254	74.7048	104	97.2472	94.6037	138.949	114.586	83.0292
VIT_03s0180g00260	78.9012	64.5426	74.0686	99.3967	86.1404	89.6733	160.259	173.914	211.253	30.1079	31.7305	143.589	64.83	87.0189	93.7079	46.7001	51.5283	107.9
VIT_10s0003g03930	122.223	93.6629	97.8355	47.5086	48.9928	53.6704	168.104	159.993	168.375	68.4128	57.99	91.4768	91.4639	80.9502	85.9316	77.6291	90.8029	89.4391
VIT_05s0020g03070	110.098	83.5314	82.1251	135.84	167.794	128.143	109.454	108.423	116.405	54.6302	65.3033	51.1761	79.1564	72.9844	63.6578	83.2072	64.3558	116.182
VIT_03s0038g00720	92.3618	165.385	159.062	78.1809	100.16	100.981	65.5416	71.153	73.9998	90.8829	93.6542	125.576	79.2546	97.3898	108.653	62.7959	71.3099	55.9644
VIT_06s0004g08280	96.4654	175.028	140.879	119.094	133.317	125.876	44.6449	53.7262	48.1858	83.6806	106.714	116.687	67.0591	101.917	117.702	50.0586	63.316	45.5448
VIT_09s0002g00690	65.9049	55.984	46.6373	310.548	383.347	290.721	25.3168	32.2571	16.8263	47.9275	70.4382	36.6624	40.7725	70.1908	33.5842	60.2277	61.9057	39.9729
VIT_03s0017g01760	56.7608	44.3171	45.5879	141.584	157.713	121.159	133.232	116.717	145.258	59.0747	67.5748	65.5307	121.303	109	95.3657	68.3012	66.8289	72.5138
VIT_11s0016g05190	57.3436	56.1472	56.1862	111.693	130.243	102.132	71.8244	83.9786	80.2107	176.686	147.702	100.958	108.486	92.805	116.081	51.6792	75.7523	67.6235
VIT_14s0066g00560	85.5719	136.096	125.196	116.211	127.941	130.846	84.4422	79.0739	94.0724	57.7004	108.265	102.952	65.5095	98.3193	105.918	54.4658	63.5685	50.4984
novel.999	3.57751	3.79118	3.841	108.173	165.45	137.427	18.6014	18.6693	16.0867	129.124	153.812	440.944	28.7058	74.2411	139.516	5.80962	14.7479	223.827
VIT_06s0004g05730	99.3952	121.408	92.4658	118.252	129.151	116.089	112.264	112.592	118.874	37.5533	72.6534	246.868	23.7216	42.9275	59.5837	19.4062	34.8702	125.718
VIT_07s0005g00010	53.7714	72.0003	65.3767	186.493	245.755	188.569	48.5305	54.49	44.863	81.9696	88.2359	56.6916	56.2165	81.7276	75.0952	97.8995	92.0203	92.1055
VIT_06s0004g04530	115.575	98.0648	100.657	111.436	130.813	116.818	48.678	52.0551	53.282	134.473	127.479	97.0899	68.5495	82.5879	67.0378	90.0683	103.171	83.9653
VIT_13s0067g03840	90.4634	77.0373	72.5086	98.7746	113.421	96.3632	65.9857	77.0448	73.9389	156.124	138.951	113.553	88.7892	76.7647	75.9389	78.0187	88.9665	97.4227
VIT_11s0078g00260	39.8253	42.543	38.4413	225.036	331.551	256.096	33.2865	39.2618	31.8098	94.1011	90.9939	43.8233	43.2061	55.584	55.7282	70.5777	85.7044	101.187
VIT_03s0091g00430	148.492	180.248	183.405	50.3987	51.1327	67.8557	55.4177	52.8086	48.5794	75.3752	103.948	98.9954	103.109	119.563	114.231	96.4449	70.6246	57.2962
VIT_04s0023g01920	130.522	102.975	122.822	21.9166	18.7717	39.1218	32.4344	36.5884	30.8483	102.221	98.737	197.032	79.7013	113.587	108.145	156.086	166.611	118.564
VIT_05s0094g01240	107.264	121.088	118.668	110.396	122.897	135.244	74.66	73.2661	74.1237	90.1893	95.5468	109.209	71.5056	84.4011	81.6406	66.37	72.0158	68.0389
VIT_18s0041g02260	134.751	101.804	100.336	108.569	180.943	147.263	28.929	43.8926	57.9151	103.207	174.797	195.821	38.7019	64.8386	68.2331	35.504	27.9984	62.4329
VIT_12s0028g03600	55.0131	68.0144	62.9336	82.3468	88.6178	86.9487	65.9144	63.2302	63.5685	175.105	240.016	171.395	63.7459	81.1492	84.1328	67.8994	84.5918	69.7738
VIT_15s0046g02010	44.9937	44.0501	47.1065	84.07	73.9616	79.0539	68.7543	74.7076	70.8496	177.482	180.855	172.11	72.7184	99.828	83.8067	89.42	109.005	100.714
VIT_08s0007g03350	110.016	167.22	117.804	73.0615	77.4329	79.6941	61.2318	63.6433	59.7625	70.2809	146.124	163.294	73.2586	101.187	121.484	58.1346	64.6054	64.4309
VIT_12s0035g01210	68.6237	103.726	88.1221	100.618	116.942	114.189	57.0913	57.1129	47.7639	131.562	194.425	158.55	52.4902	75.0826	94.6257	66.1921	85.9528	57.2919
VIT_01s0137g00780	105.01	145.93	139.402	3.46192	3.51561	23.3775	13.4213	11.0448	11.5477	90.8226	188.042	317.778	37.239	74.0312	81.3489	117.919	115.166	189.927
VIT_18s0001g06120	0.296414	0.0349968	0.277618	273.553	397.209	219.571	0.597913	0.425861	0.270531	313.48	242.196	85.0902	40.1425	28.9318	19.2487	15.9764	18.6761	12.6098
VIT_04s0159g00040	47.2888	64.4539	58.082	54.3614	59.5064	59.2648	62.7921	63.0161	60.4788	120.941	172.276	172.83	96.4435	113.504	136.023	105.168	123.511	98.1967
VIT_05s0049g00980	104.281	165.804	154.259	92.9137	62.3028	99.1464	89.9585	86.0516	87.0576	69.3897	88.1921	81.1189	83.7058	99.7331	130.841	48.9457	80.4691	43.763
VIT_01s0011g01730	100.791	136.892	137.759	21.4773	16.4935	42.4274	67.0078	55.6798	55.7015	63.5747	110.39	120.52	116.231	88.2327	98.282	183.949	167.818	83.6068
VIT_14s0081g00050	350.407	439.724	408.754	31.8601	35.8196	64.7356	47.5355	51.4846	26.7161	9.72747	14.8892	1.35935	9.71852	25.098	60.9232	16.0042	48.7923	21.6982
VIT_03s0038g02380	127.485	162.371	138.336	92.5983	91.8368	89.1272	79.2815	90.8035	98.1114	38.5625	65.489	82.7368	90.2535	107.097	114.995	72.8903	66.8977	56.1068
VIT_01s0011g03850	6.22219	7.21004	7.08928	22.7865	24.4735	23.8495	18.2512	25.0107	23.0374	188.958	171.33	290.088	102.818	162.472	198.652	66.8773	122.597	199.936
VIT_06s0061g01390	106.755	113.028	133.521	9.15457	15.8012	20.9682	3.32692	7.56059	6.09273	84.7122	88.2073	113.31	49.4467	87.0849	132.075	300.454	204.65	184.322
VIT_00s0227g00160	99.2407	120.059	109.829	119.213	131.427	121.108	70.2707	75.3259	70.7554	60.4854	87.0307	131.964	73.7684	96.4728	100.65	58.8286	71.8868	61.5111
VIT_07s0031g02130	64.7994	71.9476	73.659	105.207	106.889	116.891	52.0618	55.2176	51.6642	212.401	197.918	124.131	53.958	66.3807	73.1716	64.5443	82.189	86.3149
VIT_02s0154g00330	75.1099	122.114	103.88	62.0116	67.9713	59.5685	53.9954	56.7367	63.1701	79.0075	121.051	164.057	115.052	134.006	150.227	68.6329	85.8859	76.8569
VIT_01s0011g05670	50.9798	61.2848	71.086	17.2942	29.979	29.4122	158.419	183.854	198.68	79.7406	69.6722	86.8482	40.2616	65.1306	87.5332	135.085	149.933	143.401
VIT_02s0012g01930	93.1665	80.8253	80.1684	106.835	117.05	106.438	98.7998	101.545	105.257	102.439	79.0602	82.5032	84.8925	84.7026	80.9457	80.0319	86.1303	87.0361
VIT_10s0003g01000	93.2725	93.9883	90.761	75.9932	75.6143	72.4068	102.048	103.163	97.1113	95.6482	86.8973	90.912	112.787	102.02	121.495	84.9598	87.9971	70.1291
VIT_11s0052g01710	116.613	100.373	101.845	87.3309	91.5935	88.6285	118.308	92.7271	128.152	92.5634	73.923	166.548	72.3237	71.7596	79.5704	38.1903	44.4362	92.1679
VIT_08s0007g01930	27.5271	51.9134	40.8352	25.8102	26.0699	27.6024	3.13819	4.65515	3.11935	438.864	349.649	259.389	49.5312	93.0066	107.346	37.7151	49.1784	61.4751
VIT_03s0063g02100	88.2333	87.1246	92.4105	94.849	88.7116	82.887	79.7873	93.5514	81.9088	127.869	100.302	109.693	95.4414	95.3089	107.939	65.5218	99.434	65.5271
VIT_05s0062g01000	105.419	117.147	132.807	65.9963	71.5842	93.1563	22.0772	25.1424	27.6779	131.323	113.263	134.808	104.78	132.337	167.563	61.2819	75.7121	74.3191
VIT_17s0000g04350	84.453	104.478	101.97	89.3332	96.338	99.0115	50.4731	54.5466	61.0693	132.327	147.05	147.465	79.4825	109.31	98.6543	63.684	69.8685	66.7257
VIT_11s0149g00240	8.53051	18.1867	14.8378	116.911	107.256	123.844	65.8278	54.3029	60.5054	95.9994	184.129	190.732	91.0342	163.838	185.104	58.7289	70.9328	44.0502
VIT_10s0003g00510	91.4951	137.113	138.28	138.124	137.318	129.664	57.5727	67.84	62.8506	82.1371	96.0818	173.127	61.1334	75.3504	82.3689	40.0907	40.2019	42.3719
VIT_11s0016g03250	119.392	225.412	152.016	107.455	106.585	69.5996	20.9025	19.4212	18.192	180.818	381.419	65.8216	17.8322	23.5288	23.335	55.3867	34.0382	30.0961
VIT_04s0008g01110	10.0015	10.4107	9.40552	474.278	523.102	336.86	19.0347	27.8993	13.0775	1.63516	2.09975	1.06635	7.30395	12.1433	9.13609	61.0471	61.4036	70.7168
VIT_04s0023g00690	69.9899	56.0745	53.4438	63.9921	83.1314	72.0973	60.8062	55.6425	57.5124	161.235	170.555	122.729	64.2521	80.7803	69.4705	133.999	120.531	153.689
VIT_04s0008g06130	82.0171	74.8639	78.7137	80.5216	65.7907	78.1669	70.5437	87.8374	68.0503	74.8522	49.5673	92.1766	155.478	156.088	173.449	73.3577	89.9333	96.8863
VIT_18s0089g00910	63.3519	60.4614	52.2835	113.076	120.515	99.615	53.9878	53.661	48.6821	193.266	162.929	141.051	71.8007	77.3113	67.818	71.5053	94.6016	102.191
VIT_16s0098g00220	161.173	125.819	150.23	10.5143	14.448	30.177	46.4121	47.8307	53.5999	34.4423	41.8859	220.412	31.9635	54.8637	33.0092	268.308	123.256	199.396
VIT_17s0000g01780	95.6347	110.063	93.8579	69.3725	74.7345	66.2757	67.8645	78.9607	78.3959	58.8995	119.516	153.732	93.8818	111.779	119.432	65.8852	88.7361	99.0556
VIT_10s0003g04540	10.6603	8.0396	7.71395	181.069	288.306	167.961	6.71451	8.88925	9.1763	317.37	198.92	117.915	105.815	92.7242	69.0368	20.087	21.2953	13.4215
VIT_06s0061g01240	66.0378	64.6759	78.037	83.5865	91.175	91.6015	77.4655	77.3579	71.4928	113.614	134.57	133.315	96.0194	128.74	156.191	56.062	65.5036	59.4583
VIT_01s0011g02090	86.1087	145.121	138.168	40.2388	97.9759	102.459	50.793	43.1916	46.2523	104.052	152.676	117.326	68.6079	141.373	168.376	39.9416	58.3069	43.6897
VIT_17s0000g03570	102.595	144.543	138.24	79.9147	81.3768	91.6221	45.5456	49.5461	53.5066	93.7203	111.048	136.062	89.2121	133.195	156.031	42.3685	50.8721	44.7411
VIT_11s0118g00780	166.273	199.643	182.605	21.7379	28.6964	51.5101	132.463	107.742	105.099	9.95161	24.4267	72.875	101.758	118.872	83.9055	104.962	70.6906	58.3605
VIT_05s0077g01690	1.83086	4.75563	5.05856	15.9756	17.5109	25.1485	20.3705	15.5397	13.535	533.213	475.768	186.816	27.7762	62.6712	144.669	14.4152	55.4812	20.9957
VIT_08s0058g00750	84.4012	99.7371	93.2464	70.874	79.6083	88.3832	42.0607	43.0684	43.7204	96.0378	134.127	173.633	97.0745	142.17	146.609	59.9584	69.1033	72.4069
VIT_00s0958g00020	21.9703	22.827	21.6918	335.095	423.707	336.479	45.9504	53.2963	36.0098	42.8812	30.2137	21.5212	21.7757	28.4323	25.9236	41.4559	56.4425	70.4856
VIT_07s0005g00690	89.0383	133.376	112.999	80.6674	83.0654	75.2497	61.7691	63.1082	58.5023	85.7944	122.353	137.551	83.9728	113.763	142.95	60.0499	66.9377	64.8277
VIT_06s0004g08220	54.1931	55.4593	54.2495	93.5238	99.8165	80.3891	80.7339	79.8679	83.3884	146.905	119.121	121.379	95.3852	89.2041	101.77	75.2607	91.8131	112.711
VIT_16s0100g00300	173.876	143.284	137.619	86.0732	80.1127	88.8165	113.481	96.9713	93.7367	19.7971	30.4347	101.919	76.3825	79.509	69.1106	82.4556	68.4218	92.4389
VIT_06s0009g03430	112.649	127.681	139.677	69.5279	82.4245	92.7491	47.0937	53.3945	56.3753	77.8492	73.836	94.3389	70.1249	74.2821	77.109	119.25	165.299	100.739
VIT_00s0187g00360	237.533	318.473	243.129	12.5762	14.1073	35.5233	19.6503	18.0008	24.4946	49.4259	96.03	60.016	56.3387	68.2041	70.4099	116.144	108.444	85.5055
VIT_04s0043g00440	100.194	145.14	119.344	93.7205	107.08	96.6521	74.4325	72.5155	66.7743	70.5214	104.676	96.1032	82.9388	110.731	135.898	47.7062	60.9428	48.6181
VIT_08s0007g04860	56.3998	50.2431	64.8134	80.4144	131.188	94.057	15.6896	21.0714	19.7863	235.305	236.569	198.038	32.5735	35.0314	45.0846	136.205	91.7524	89.7065
VIT_15s0048g02030	102.15	90.3122	100.869	115.432	123.658	118.263	41.3374	40.3605	44.5333	85.8773	98.3643	153.619	64.35	79.5097	67.639	97.5972	101.452	105.782
VIT_05s0077g01480	77.2365	62.6592	52.3403	115.85	107.667	89.9323	78.8553	71.9656	83.3107	140.009	147.222	76.6163	104.257	100.613	78.1188	71.7834	76.0621	96.4778
VIT_01s0026g00840	76.2797	76.4643	65.0177	111.878	105.91	92.573	16.6027	17.7123	16.2065	291.431	278.333	67.7925	84.1422	91.7091	55.4987	70.9276	75.6201	36.6697
VIT_05s0094g00780	65.8166	59.0213	61.7156	90.3811	97.0843	75.0907	117.324	110.87	98.0898	83.4831	78.0788	89.754	126.155	113.105	124.557	81.0961	93.9731	64.9394
VIT_00s0204g00170	120.784	117.75	107.498	88.9838	104.012	82.4078	133.149	132.518	112.808	31.7524	52.443	67.9104	77.2974	89.4306	92.0758	77.3837	78.7375	63.5656
VIT_08s0058g01360	56.7245	57.0992	55.0953	109.136	125.174	102.189	67.729	69.5454	67.8532	124.998	98.5733	139.509	78.1369	68.961	86.2216	77.4012	80.0918	165.535
VIT_17s0000g03880	110.564	89.9784	87.4135	70.9929	82.5711	80.8997	56.7648	61.3091	58.9354	119.031	107.429	116.257	67.3146	76.6303	61.8627	128.738	133.74	118.49
VIT_15s0045g01310	49.4241	67.3023	65.8744	113.738	129.86	119.314	48.4875	54.1608	49.7536	138.503	148.176	175.862	68.2049	78.8641	84.967	53.2704	73.4084	109.336
VIT_07s0104g00150	193.726	305.323	229.514	170.166	166.674	170.828	49.8803	55.7651	57.419	6.98207	14.8281	12.609	31.1766	71.3248	55.2499	8.84248	13.5172	13.775
VIT_07s0129g00520	61.9211	62.3381	68.5527	75.747	112.443	86.1204	32.0166	35.3076	33.7114	198.772	145.173	121.084	52.5712	63.8567	69.5043	132.487	144.805	130.765
VIT_12s0028g01800	77.9178	110.155	96.9866	82.5072	93.0809	84.2162	77.852	78.8052	72.4993	69.9004	127.503	111.422	87.6757	125.298	145.665	60.8689	70.4204	52.9415
VIT_08s0040g01410	107.115	159.125	124.8	95.5167	97.3102	105.645	47.6314	49.6822	50.6724	81.1185	104.206	115.607	86.5612	102.138	119.167	59.2691	64.837	54.8876
VIT_17s0000g06430	94.7514	112.688	114.319	93.6599	123.144	119.801	56.0117	59.5591	53.438	78.0181	102.968	119.83	83.1204	115.27	118.01	59.3005	57.8487	62.2997
VIT_07s0031g01940	97.7894	100.797	108.741	120.77	119.434	115.745	84.2293	78.4643	83.1532	55.9406	69.6747	123.859	76.7353	100.143	95.6663	61.8384	58.634	71.7651
VIT_07s0031g00800	89.7729	98.6449	93.1381	41.6021	38.4032	55.5313	94.9066	96.1	102.513	22.2813	28.8936	122.536	103.662	130.367	140.986	129.315	72.1205	161.824
VIT_01s0026g01860	99.1942	142.759	132.827	103.56	103.353	104.584	58.5341	64.9477	63.7	77.6569	112.613	127.821	71.0794	91.1997	104.605	52.3742	59.3637	51.8732
VIT_13s0019g03190	7.35262	17.9748	13.8628	53.6187	78.1112	61.7413	5.38766	6.7131	3.99126	425.032	561.879	209.009	14.1851	31.8487	40.8459	11.0718	23.9827	55.1094
VIT_17s0000g04840	86.3771	74.7755	75.152	98.5755	99.6297	100.537	23.1294	23.8058	18.9735	172.114	281.381	79.1927	53.541	81.0131	65.8213	110.501	124.862	51.5659
VIT_02s0012g02190	35.4984	24.4159	27.4868	28.821	36.5962	29.4212	34.1559	49.5495	55.0358	192.605	209.387	213.468	100.125	113.162	120.225	113.109	118.064	119.528
VIT_02s0025g02660	52.7057	51.2366	54.3068	163.089	186.655	142.593	49.216	58.8802	49.408	227.354	171.204	73.8801	65.4874	50.3984	56.3829	42.4541	66.3109	58.6502
VIT_18s0001g09220	60.1681	83.1648	69.6501	82.6005	98.7371	85.4942	44.0522	42.466	42.9491	248.357	282.195	153.28	52.6778	79.0951	76.8735	30.5538	50.6132	35.0338
VIT_05s0049g00780	2.19985	13.6065	3.72192	0	0	0.659596	0.602707	2.57235	2.07252	7.81672	89.2742	217.882	63.1908	122.567	306.164	8.09962	180.62	596.045
VIT_14s0068g01960	100.353	80.0546	73.6366	95.6996	92.3512	77.5674	131.127	127.244	108.721	110.069	103.656	42.5559	88.5844	71.9705	74.1165	101.894	96.4508	40.6548
VIT_16s0039g01420	132.34	157.705	160.847	111.07	103.358	97.9379	10.9337	11.3817	10.1793	176.328	188.432	57.4345	72.0126	56.3145	55.457	81.6894	109.769	23.459
VIT_19s0014g02880	88.4726	77.7436	80.9957	47.5528	46.683	56.9122	64.4838	68.3334	68.5525	70.6363	90.4158	148.076	122.431	115.552	116.421	110.665	112.661	129.672
VIT_18s0001g11470	6.84475	4.5818	7.21902	83.0961	74.0353	66.4492	62.4565	66.0944	64.8608	19.5693	15.8494	62.2869	265.176	277.205	224.141	129.202	88.0986	98.3564
VIT_05s0020g01480	102.65	144.641	146.833	64.9632	65.6465	74.9806	55.6387	66.334	57.6596	75.5883	101.798	137.014	80.6353	119.336	151.394	62.8223	61.7831	45.2712
VIT_18s0001g12480	74.8712	70.9699	72.6418	123.498	117.948	106.802	63.9165	65.4644	68.7918	164.934	161.507	105.995	52.1341	64.9274	61.2558	83.4987	83.9808	71.5761
VIT_18s0001g11370	239.097	328.842	276.658	38.4381	41.1071	57.6311	84.7936	84.5396	76.2601	10.0389	19.0215	38.5332	59.6755	75.0053	60.7739	58.8706	36.6825	28.1938
VIT_18s0001g09080	87.0832	126.067	119.883	118.308	168.559	154.565	27.3177	24.9549	24.7623	113.204	139.976	107.403	69.9975	95.5552	68.5906	51.7976	65.8666	46.4828
VIT_03s0038g02500	82.7554	101.251	87.5182	137.001	139.078	153.403	79.6981	76.7796	62.9768	66.8941	100.301	96.9138	91.9496	94.4855	95.1177	44.6018	55.9623	43.4425
VIT_05s0049g00680	18.3312	132.283	51.7354	204.647	97.9353	117.631	150.779	407.844	422.204	0.1813	0.436522	0.798067	0.806102	0.534599	0.987375	0.0861031	1.62962	1.20554
VIT_03s0038g03570	178.102	142.454	133.926	62.8674	69.896	79.2174	7.75862	5.51896	7.44802	213.073	239.405	102.739	79.5878	94.5967	78.6771	15.5755	65.2007	29.995
VIT_19s0014g03310	140.436	159.194	171.107	11.738	18.7419	21.3203	61.984	66.8373	62.8922	6.57805	21.9138	78.7984	60.2532	101.471	102.423	269.796	107.883	142.284
VIT_05s0124g00610	206.372	162.655	202.169	62.4953	70.8903	106.332	34.0657	49.3531	44.3242	71.518	74.0214	137.182	38.6765	57.444	48.8857	90.7555	58.2272	90.2797
VIT_14s0171g00400	15.1656	16.6015	12.232	80.2853	105.193	77.8406	13.4767	22.4192	18.5758	157.265	130.109	224.545	79.7308	97.3328	65.0864	77.4296	76.9046	335.448
VIT_10s0003g01680	150.841	101.885	112.819	60.2261	63.4998	70.4041	53.7404	49.9997	48.656	133.344	118.642	72.2466	79.8944	68.1593	59.8329	163.075	109.227	88.7653
VIT_11s0052g01380	43.0932	38.1004	40.4322	104.185	120.758	100.289	87.6542	96.2536	73.9334	215.04	199.394	91.7501	59.6181	58.1121	52.7716	70.6194	97.2445	55.3082
VIT_11s0016g02580	104.543	69.6571	88.148	46.9396	54.4518	66.3984	42.7519	52.1945	54.949	105.624	62.2509	100.43	77.2116	70.7532	70.0395	186.221	146.054	205.892
VIT_07s0104g00440	44.2156	55.7915	50.4906	142.065	165.969	132.837	133.026	138.477	129.238	67.8659	81.5801	111.673	54.2174	71.9955	97.5076	27.4982	41.3291	57.3973
VIT_05s0029g00330	37.9044	76.2249	72.5795	106.741	112.563	80.6353	54.3434	70.0896	87.1369	67.3708	85.7835	100.423	137.005	107.164	144.538	60.02	117.711	84.61
VIT_06s0004g04300	107.137	123.243	152.631	77.5502	85.6778	88.6519	67.8805	77.0338	75.2017	94.6708	90.9463	89.3292	89.8442	93.4048	105.42	62.9797	56.9094	61.052
VIT_15s0048g02280	134.88	110.043	108.232	51.7298	47.7449	60.397	51.5784	56.169	50.1031	84.8244	83.6839	50.1045	85.2346	78.3144	56.4619	196.742	180.218	113.013
VIT_14s0171g00490	58.5558	48.9198	49.0503	146.255	164.482	147.443	76.411	85.791	79.4133	126.44	89.3876	86.5125	82.9959	91.137	111.284	31.1997	57.9528	66.2363
VIT_01s0127g00350	74.3864	131.592	122.116	73.2158	102.84	96.9959	47.825	54.4691	48.7373	63.6928	114.335	161.585	79.7498	117.709	139.674	48.9695	65.5628	56.001
VIT_14s0060g00230	160.394	169.742	180.421	21.5375	19.0821	41.7097	28.1043	26.258	26.4704	53.7611	47.2027	38.8489	196.974	124.776	100.727	160.009	127.47	75.8031
VIT_04s0023g00590	97.924	119.845	106.917	123.033	124.423	105.226	72.4255	78.1555	74.9761	38.6642	67.4518	89.2454	100.784	115.676	101.898	56.537	70.4215	54.2058
VIT_05s0094g00820	346.707	252.302	285.399	16.2336	22.1642	53.6937	53.0131	40.9709	38.3643	14.8978	17.9749	11.458	56.656	42.7677	24.3102	161.337	105.733	52.7662
VIT_10s0003g05020	90.8847	83.1123	91.5781	75.0338	78.3936	73.7731	70.9659	69.6003	67.328	125.764	117.302	115.477	98.3903	99.2781	98.8455	80.9775	78.6512	80.314
VIT_07s0104g00970	49.7993	68.696	56.0681	69.6077	92.6729	89.0332	35.0113	31.5709	29.6349	50.5402	82.0628	151.364	138.191	158.248	152.455	105.538	143.987	90.0055
VIT_06s0004g00590	36.4673	48.438	54.5678	110.306	134.606	117.18	62.7319	61.1461	58.5703	53.6515	74.2633	120.236	128.376	197.746	224.085	24.2382	28.3508	59.3206
VIT_08s0007g08840	85.1494	63.8684	84.6239	19.0441	18.3245	27.5778	28.729	35.2548	37.2541	61.4843	84.9018	283.587	99.6792	137.844	125.767	107.52	102.789	188.966
VIT_07s0129g00470	239.513	223.16	221.862	31.0838	32.6695	46.8199	130.492	106.245	105.11	11.0179	19.7855	21.387	25.0468	16.921	12.4175	171.695	114.044	63.0689
VIT_19s0090g00410	60.3642	50.7343	50.8031	63.5346	62.7848	58.0406	60.4947	61.1626	63.9568	254.984	187.62	154.194	67.0575	75.2356	69.6702	69.2921	63.2708	119.039
VIT_06s0004g00480	80.2806	92.5064	90.4779	109.714	127.34	103.127	57.489	60.1168	67.2427	106.534	89.7313	58.8102	156.453	127.416	127.734	52.1866	46.9895	38.049
VIT_19s0014g01420	86.6958	92.4673	106.132	129.378	141.55	140.479	57.1233	60.6629	67.1604	68.5183	65.7742	87.3072	84.1551	104.078	107.868	54.3054	58.5738	77.0848
VIT_05s0020g05060	36.5593	28.0529	26.6754	62.5229	56.121	52.3929	259.851	215.426	225.116	10.5762	14.7005	96.2944	53.3401	46.7854	50.4395	84.1928	77.7928	191.915
VIT_15s0046g02370	78.7347	83.5855	87.7437	133.694	135.56	132.737	56.4318	54.9991	63.3698	87.327	88.8655	145.265	69.8486	76.9929	80.0871	47.881	53.3262	112.141
VIT_03s0063g00120	56.6283	41.7914	43.0348	86.316	102.808	86.6635	95.6195	79.2409	84.7143	39.7153	46.196	161.577	77.1162	88.6267	84.1951	116.882	105.178	191.031
VIT_13s0156g00210	47.2707	30.6911	32.9896	121.46	117.855	110.993	99.0143	96.6938	104.765	78.456	58.7602	83.9882	115.84	111.955	107.584	80.9621	97.4241	90.3959
VIT_19s0093g00150	17.6727	16.8471	15.8624	245.621	334.224	311.973	8.40836	10.923	12.4705	84.2075	125.551	69.1925	47.4248	52.4343	66.898	61.4795	65.4618	40.2978
VIT_04s0023g00600	69.2753	73.1026	70.0327	95.1249	88.7424	79.507	81.6654	90.6003	83.8169	100.18	107.717	121.713	75.6357	97.4928	109.782	73.1588	87.8886	79.9543
VIT_07s0005g02070	30.1733	38.0367	52.8913	114.985	77.3148	111.432	32.0089	57.4025	46.5048	188.371	307.23	121.012	40.4637	75.2411	82.9055	69.6086	99.8059	37.7232
VIT_08s0007g08040	122.137	204.261	201.33	30.2832	29.2884	76.426	2.92898	3.04899	2.88516	182.42	233.429	124.489	43.362	74.6956	67.7991	56.0358	80.4757	47.3837
VIT_01s0011g05370	99.479	80.3844	84.3366	50.9044	45.3816	54.7448	86.3634	83.8647	81.7956	96.1106	88.5774	101.65	90.1937	60.3241	56.5449	166.658	121.147	133.59
VIT_18s0001g06020	335.175	220.591	224.222	7.16998	5.96204	38.0218	29.3305	28.1943	33.5059	71.4825	120.075	106.1	67.4647	87.4046	91.9573	37.2092	47.554	30.0876
VIT_19s0014g01570	75.263	54.407	51.2554	108.703	135.917	97.9777	91.3087	80.7603	72.0183	109.296	135.865	86.1486	66.6981	64.2645	69.2849	92.0844	84.2648	105.193
VIT_11s0016g03070	61.2749	54.0317	56.6909	125.105	138.232	112.157	99.5986	98.0478	94.3227	104.721	80.2121	96.7906	83.3924	87.1967	82.1682	59.9306	64.0163	81.8734
VIT_18s0001g12120	168.439	118.507	144.196	112.503	132.688	114.182	123.772	105.058	89.8857	37.4049	48.0049	21.6749	26.4702	24.8215	20.1672	146.136	93.9151	51.6973
VIT_08s0040g00410	59.449	82.4987	83.7638	67.9421	64.935	75.9813	61.6463	67.0494	64.4942	154.017	125.105	126.625	92.092	93.6349	119.069	70.5665	92.1182	78.4955
VIT_02s0012g00150	82.8189	70.126	72.3873	77.4603	110.452	98.8318	45.1697	43.2667	48.2839	163.225	131.161	101.115	84.9136	94.4521	91.8955	78.8476	87.6886	94.7074
VIT_17s0000g07650	83.2642	76.9012	78.0152	111.901	104.483	93.9654	96.3836	92.6037	102.459	71.9789	68.1559	91.0914	79.8047	84.5176	86.2501	76.1782	79.4132	99.1616
VIT_14s0171g00380	47.5397	42.4338	39.9557	195.347	240.281	195.72	58.8187	59.9185	56.3975	125.522	103.046	56.708	45.8012	52.4944	44.1138	69.5117	64.1982	78.581
VIT_19s0014g02160	83.6272	82.2846	78.2206	101.615	104.723	92.6596	43.5569	48.5733	45.2389	155.039	154.124	125.86	59.2257	69.289	61.3466	93.1217	95.9326	80.7198
VIT_05s0077g01230	52.6625	65.8971	59.3704	120.329	140.127	119.081	59.8919	68.5805	65.4546	143.649	163.751	119.29	68.3481	81.3302	85.2181	42.733	62.9468	56.4533
VIT_12s0057g01000	238.152	297.863	360.809	20.3055	21.8004	58.6418	50.9152	47.8847	39.5647	14.2149	19.0728	30.5436	93.1836	98.7183	61.8443	60.2393	34.5091	25.8519
VIT_02s0025g04300	5.20211	21.1859	7.02362	27.9614	11.7227	42.2133	173.404	441.835	348.814	27.2869	19.7642	11.471	20.8891	102.208	241.919	9.42482	25.8107	35.7029
VIT_00s0487g00010	106.418	69.6038	90.4721	7.70071	7.16831	22.1067	109.167	126.699	128.79	30.3181	33.091	80.9116	84.2467	80.9598	86.4713	222.832	135.527	150.26
VIT_05s0102g00750	113.062	88.6184	102.759	44.7567	42.155	41.9234	141.909	141.106	140.68	16.8025	18.6357	26.7389	82.6941	64.6162	51.7922	188.678	127.869	135.878
VIT_19s0014g03190	98.9143	162.367	130.141	91.8087	105.21	76.599	51.1857	50.7018	49.2939	47.8744	85.5113	72.0999	122.593	100.902	111.311	65.0875	100.733	46.2849
VIT_09s0002g08420	107.077	122.045	105.78	53.3413	57.2812	68.3187	72.68	67.964	62.2162	165.027	227.525	86	44.5595	53.6086	46.8737	90.5044	79.5915	57.5196
VIT_01s0026g01050	62.0074	63.8998	80.8425	37.6403	31.8692	29.105	246.142	240.673	297.178	8.75587	11.3466	12.5112	38.6589	26.9449	39.8126	195.072	85.7073	59.6586
VIT_03s0017g01980	56.5603	71.4532	65.916	90.5424	92.9979	92.9994	62.841	60.9765	63.1349	156.337	127.088	141.367	83.6555	100.082	111.076	53.1092	60.5091	77.1484
VIT_07s0005g01360	59.351	52.8	63.5378	24.8772	34.6982	44.9742	23.7389	22.8811	29.1628	157.106	164.028	282.877	90.7022	133.136	113.58	87.231	71.5741	109.631
VIT_16s0039g02770	84.7286	98.9805	110.236	94.4492	117.419	104.267	59.6973	55.7031	60.8843	90.7185	107.775	121.845	66.4884	88.7945	105.524	62.1276	65.4386	69.9667
VIT_04s0008g05590	159.16	157.075	158.823	50.1533	63.4248	55.8953	131.529	117.92	113.55	15.237	13.9721	26.6385	55.7953	55.0728	40.5493	160.124	114.302	74.987
VIT_08s0007g01650	49.1832	42.7184	43.3085	30.5846	26.8295	38.7922	40.4916	47.026	46.6037	196.774	183.126	141.43	75.5388	81.2543	56.1597	165.58	129.117	166.508
VIT_00s0211g00120	173.681	124.632	141.382	30.8351	29.7189	54.0756	88.3035	75.0663	70.5853	44.7958	32.5902	21.3379	68.8663	38.459	24.9116	254.469	187.392	98.1148
VIT_04s0079g00760	71.4995	70.4878	71.3304	84.0313	79.5442	62.5699	73.8509	78.8287	80.031	108.892	123.272	122.603	88.6816	85.2573	99.4337	73.3602	89.2308	95.1427
VIT_13s0067g00930	75.3252	73.2343	71.21	11.7295	12.9996	22.042	34.3577	40.0147	36.9828	114.197	156.187	261.099	53.5054	79.795	94.4992	123.202	120.415	177.017
VIT_04s0023g03170	29.3743	44.7319	36.7757	163.663	206.65	157.787	14.2562	15.6732	14.3035	300.82	281.596	76.6184	41.7311	37.338	37.8825	26.5639	42.7387	28.4668
VIT_07s0104g00510	156.529	118.705	124.555	37.3373	39.8091	42.9393	97.5624	85.3234	82.3043	67.2421	63.4397	48.1585	106.331	81.623	70.6355	151.88	113.568	68.9984
VIT_00s0981g00010	92.4859	157.181	157.507	152.591	178.629	174.343	47.1577	55.1732	54.1801	79.2258	70.6435	67.9204	46.8356	66.6132	82.8682	23.3366	30.7253	18.9414
VIT_01s0026g00920	93.3902	77.2238	84.7019	97.3937	101.375	93.8721	93.8018	102.706	93.795	91.9171	80.3021	81.9596	88.2245	72.2629	72.6496	66.2282	78.9351	85.5115
VIT_09s0002g00880	54.9732	50.7382	54.0028	111.434	141.833	108.542	59.2813	60.1991	57.4314	157.339	183.192	100.531	62.7839	67.3679	65.5521	71.2954	70.4334	78.4902
VIT_03s0017g01280	14.0484	15.2379	14.9322	75.9422	87.598	62.8996	51.7502	76.1511	63.9604	387.04	340.676	135.05	12.2081	24.728	27.862	49.6616	68.8422	44.2012
VIT_08s0040g03310	59.7716	60.5545	59.3732	130.515	148.081	117.906	67.7587	72.0567	64.2062	121.919	132.366	86.09	83.754	81.275	82.0127	52.0284	65.6592	65.2965
VIT_03s0180g00010	87.6789	76.832	75.2335	111.301	137.721	105.003	45.0607	51.0107	40.6298	170.534	173.099	81.1225	68.1585	66.6669	71.6062	55.3542	72.2041	59.3333
VIT_14s0066g00140	128.884	100.929	115.11	58.8875	61.4732	59.5538	67.0929	56.843	54.7212	54.1228	70.711	68.2402	151.84	151.053	132.52	85.0657	72.6238	58.5762
VIT_14s0030g00410	140.866	176.188	198.035	49.6245	43.3952	58.4001	42.981	42.5904	52.9811	21.4236	31.6014	208.32	79.2606	113.923	146.198	15.0538	18.3261	106.973
VIT_05s0020g03060	95.1127	62.7048	65.1448	122.604	82.0984	108.745	126.048	125.288	135.829	62.4791	47.7044	64.6791	68.8281	69.951	57.2462	77.6814	57.1986	116.669
VIT_13s0067g02480	55.661	47.6086	54.4484	77.8801	71.2074	75.8803	85.6718	95.1695	93.4449	109.309	97.9844	100.868	115.626	87.7235	84.6454	106.114	76.7587	109.358
VIT_08s0007g08050	88.2035	62.8071	75.5552	89.0441	90.4078	78.399	89.9779	101.445	99.9394	43.0504	37.3888	100.92	63.8323	43.4875	49.1874	125.351	112.013	194.194
VIT_07s0031g01710	18.2092	23.2191	23.7816	7.04242	2.00912	6.26866	34.6258	45.3464	34.0693	108.281	199.355	74.7613	34.6986	54.5792	59.5838	271.986	489.072	55.5991
VIT_11s0016g03780	42.8493	55.0967	48.5577	112.383	149.067	123.274	42.4654	48.4333	43.3858	156.568	205.382	127.647	52.3118	65.1049	67.2506	60.0464	69.8449	71.8112
VIT_18s0001g15000	58.3996	48.4199	60.09	72.571	71.0517	59.3649	50.3806	42.4807	45.0133	33.0985	36.95	6.49848	262.11	152.282	117.288	249.266	133.383	41.5602
VIT_08s0040g01760	104.92	85.2102	90.0928	54.1656	62.244	57.2167	43.6547	46.0829	35.6012	46.7278	49.085	75.8323	214.163	225.864	210.794	57.9897	39.3492	40.3107
VIT_00s0415g00040	52.5106	43.4154	41.5894	67.4525	49.4831	52.2818	164.54	164.732	192.095	49.9783	32.0599	72.5852	162.085	78.5738	82.7956	44.4137	42.3578	145.657
VIT_08s0040g02860	66.0996	56.276	59.5059	150.478	208.339	150.439	72.4786	70.6767	65.3998	105.414	126.317	56.4143	53.4869	56.1007	41.187	80.6997	58.4113	60.6002
VIT_13s0019g00840	67.2546	75.7735	62.5301	128.311	148.553	122.736	153.4	91.4713	133.928	66.4557	70.3595	85.4889	66.0776	74.2372	74.3017	27.7133	35.7994	53.226
VIT_05s0020g00930	95.1774	101.081	108.991	32.1029	34.4835	42.1209	87.6359	91.115	93.8265	24.3301	50.4762	65.4379	110.922	123.057	113.492	154.688	122.788	84.6535
VIT_14s0006g00640	85.324	69.8058	70.0595	117.634	116.172	90.1344	158.689	132.361	129.727	34.0341	42.1275	52.4521	88.3144	79.7014	73.3325	68.8034	55.9479	70.3007
VIT_18s0072g00080	39.0769	52.5252	50.5348	100.711	129.923	104.826	20.4666	21.7482	21.7646	207.194	193.481	165.381	60.7628	63.3726	77.7967	53.4229	82.772	86.6272
VIT_19s0014g02630	42.347	46.2654	38.291	147.762	210.715	157.707	45.0825	44.2554	48.5342	223.754	138.854	102.907	50.443	61.8912	65.3536	24.2332	34.4473	49.5017
VIT_07s0129g00160	85.4707	78.9733	61.1614	17.8327	47.4847	19.0093	18.2937	20.4282	16.7095	114.489	187.69	160.052	110.753	190.3	220.061	57.8396	67.6595	57.5338
VIT_05s0077g00630	52.997	55.383	57.5091	46.0917	57.004	60.7154	35.2608	39.1073	38.4054	116.281	114.351	131.653	172.295	180.715	179.681	67.7098	64.9977	61.1604
VIT_19s0085g00880	125.252	106.941	117.857	64.9159	63.737	68.6143	76.8397	73.301	73.2426	92.5721	91.6591	86.7719	98.8179	98.5794	96.2184	70.1517	70.6208	54.2616
VIT_08s0007g04470	72.3759	67.607	74.5757	117.41	123.145	126.387	50.9995	56.7731	55.8975	139.656	131.749	103.313	61.9341	75.7395	74.5704	59.5994	69.2441	68.5327
VIT_05s0094g00940	103.164	136.793	147.804	79.1602	97.8447	104.077	48.0897	53.4588	43.5222	74.9056	85.0552	130.828	75.0385	90.2129	104.336	45.5658	55.1725	54.1343
VIT_19s0027g00130	115.333	79.2638	82.6718	49.5272	47.4651	48.8086	121.548	98.7967	96.3121	49.3863	32.5847	45.1646	78.3881	46.1508	37.9341	219.087	151.261	128.693
VIT_12s0134g00450	85.5319	66.1012	69.9119	20.9026	23.0638	30.0326	25.8119	31.5809	37.5593	45.8118	50.099	116.496	60.6195	70.4337	78.2373	257.762	201.685	255.913
VIT_07s0005g04750	80.4335	131.752	110.695	65.8561	70.6673	71.0715	46.1825	49.1447	50.8053	51.1653	89.0444	163.497	88.9351	116.874	136.164	58.9156	64.9509	79.8963
VIT_14s0006g01250	114.426	108.565	122.638	57.885	60.9163	76.9398	105.352	112.589	102.894	64.2708	102.011	115.674	44.9039	78.5566	87.6469	43.2062	34.5739	90.7635
VIT_15s0021g02490	98.603	132.056	107.168	97.8026	131.719	127.008	35.4672	34.6434	32.4042	70.2067	160.858	158.877	57.5621	73.7674	72.0114	31.7873	43.8795	56.8717
VIT_03s0038g02620	86.6985	75.6389	74.3824	143.444	154.213	124.125	85.3947	82.5274	85.4098	69.8967	73.1325	45.294	71.0697	74.5014	58.0486	80.5755	67.3278	70.0895
VIT_05s0049g01020	112.906	103.268	119.941	20.407	22.2686	43.6105	31.6545	42.8959	38.9743	31.446	46.0666	234.414	94.7435	153.69	175.59	48.7067	42.0406	158.574
VIT_17s0000g00320	65.8469	51.5514	46.1934	67.497	70.7079	66.3953	90.3682	82.8061	81.1349	136.926	121.706	158.862	70.3606	61.5673	59.7729	67.6713	68.6287	152.006
VIT_18s0001g11260	89.7528	69.2211	67.2975	35.2032	36.1018	36.3501	37.9446	40.4868	35.2598	133.927	171.211	98.3102	86.612	98.5316	89.1518	125.968	168.727	99.4631
VIT_10s0003g04390	118.892	86.5537	86.0474	47.4405	47.9517	56.8931	60.4816	63.2692	55.6257	116.167	74.1189	42.5933	133.423	68.86	71.136	166.304	143.544	79.919
VIT_07s0031g01640	116.828	64.4313	73.9651	43.2925	35.6393	41.684	208.793	172.486	178.185	9.86556	4.63671	18.3231	82.5239	37.4945	24.9874	176.319	108.611	116.856
VIT_09s0002g04510	124.878	127.857	142.414	87.0863	83.0328	83.4834	89.8079	80.6621	74.6531	40.2543	55.9056	76.8516	58.9395	83.2733	83.3845	79.6106	75.8614	66.5015
VIT_11s0016g03180	34.492	28.9727	29.3127	38.2426	35.2122	38.9486	54.112	47.0979	59.926	148.222	218.288	244.045	23.3853	28.6697	18.4875	117.757	97.5129	250.604
VIT_10s0003g02950	83.7084	95.0176	83.6729	149.384	121.142	123.864	68.1856	71.845	69.809	96.5424	108.061	62.0707	59.9376	59.2458	53.7891	69.1954	69.3975	67.6488
VIT_14s0060g02260	83.9366	78.1901	78.9872	90.8336	94.9827	93.1468	72.1018	69.139	69.2628	100.262	79.0597	106.445	89.8018	93.7556	102.996	61.805	65.3001	80.9676
VIT_08s0007g05170	66.7138	55.9287	61.7649	89.2527	95.3059	84.3059	73.3372	79.9343	75.3324	144.412	142.005	102.515	63.2764	64.8808	69.0292	70.7462	84.2255	87.9594
VIT_16s0039g01850	116.726	124.012	119.687	40.3138	44.5255	60.8947	16.5231	15.529	14.3054	201.071	209.261	149.021	45.3465	67.1883	58.6633	75.8095	80.5461	71.0893
VIT_00s0304g00080	71.3743	65.6766	76.2145	159.885	203.629	166.741	26.8299	26.3013	26.953	64.1101	72.9246	71.9075	64.0883	75.7008	60.2334	91.8378	116.587	63.3415
VIT_07s0129g01110	98.9832	93.6267	97.3603	52.7429	57.6937	65.8674	71.0008	82.5216	76.5287	48.2188	46.1367	83.1505	83.6152	100.881	90.2148	121.229	142.025	91.5184
VIT_08s0007g02030	149.967	122.817	107.153	43.1632	46.3641	48.4247	90.5364	78.9979	80.6001	55.0172	69.7826	64.4366	97.5401	69.3228	85.5866	128.264	118.579	46.5145
VIT_16s0050g01390	13.0018	10.5933	12.0844	3.69128	3.00859	5.43266	30.0094	61.0741	75.3657	47.8166	74.0233	258.501	81.179	160.715	196.703	166.778	122.985	179.589
VIT_14s0006g01600	81.1099	89.1904	114.664	24.6353	23.3131	35.2141	144.864	141.295	159.038	13.3898	21.5786	97.1864	55.6312	87.5046	75.6442	147.191	72.7742	117.61
VIT_19s0014g02640	37.762	36.8865	41.6331	151.201	177.517	142.426	50.2429	51.4909	51.9449	230.521	139.336	92.4384	55.159	59.9407	64.9702	24.1892	37.6983	55.4529
VIT_01s0026g00250	90.4577	105.58	96.3406	72.954	86.3139	73.3364	55.4261	52.0417	47.1175	107.765	124.975	115.402	79.8048	103.025	108.374	56.5403	65.4598	59.0716
VIT_17s0000g06230	76.0282	70.8903	61.4914	107.465	97.9598	94.6359	54.7458	67.8067	59.8812	128.591	111.304	61.1329	110.899	110.248	87.8956	60.4849	81.6672	56.0854
VIT_05s0136g00290	55.8474	60.8952	57.9469	82.6931	86.6342	80.9325	41.6199	51.0101	59.1536	106.306	121.231	137.286	100.785	113.569	116.177	62.1321	81.7952	81.5956
VIT_18s0001g08010	67.6623	71.8786	63.0606	91.9249	74.4064	76.3634	87.9927	84.6673	103.651	56.953	64.2125	146.166	99.1982	98.0331	91.9175	60.4152	62.0222	95.4223
VIT_05s0020g03610	135.418	151.355	121.764	37.3305	43.33	56.9451	48.5197	45.443	47.2009	53.9131	81.8497	128.684	68.095	103.43	96.8754	70.9694	84.5861	119.329
VIT_05s0020g00390	57.2768	47.5963	51.9186	87.0552	122.721	96.6145	65.6009	68.5963	68.0183	80.1741	79.4511	171.955	45.2472	60.6489	71.0023	89.3839	63.6479	166.947
VIT_01s0011g02200	31.1035	31.5158	29.401	63.9915	56.4657	52.9857	47.1035	62.2377	64.4728	198.26	140.551	110.649	137.183	115.065	138.68	57.6121	94.4318	61.1825
VIT_13s0019g04470	142.618	133.8	146.056	23.3341	29.7786	48.8265	12.7661	16.6887	14.0772	81.3351	66.3001	58.5423	98.893	110.957	93.7635	141.35	205.298	66.64
VIT_16s0098g01260	32.5824	31.3211	28.9967	47.4551	62.5165	49.0751	18.6124	20.1806	20.4672	185.295	188.531	160.694	137.787	156.516	186.464	50.8295	55.4139	57.505
VIT_00s0260g00060	66.2661	114.667	119.202	72.4718	75.8634	80.9304	47.7203	56.9603	53.5197	84.8492	94.9616	110.857	102.915	113.562	135.761	49.9308	68.4649	40.9484
VIT_10s0116g00760	28.5298	31.4124	25.4334	70.495	84.9444	68.7974	21.156	21.6079	16.2779	330.903	367.441	147.451	34.4419	43.41	47.4283	30.5058	57.1665	61.3001
VIT_07s0031g01380	35.9673	31.7159	22.4986	210.947	154.454	138.748	187.374	207.06	272.171	18.2434	16.4128	8.83385	50.8923	51.2532	28.8216	16.9133	22.3225	13.9745
VIT_00s0179g00260	27.3325	26.4933	22.7978	136.423	186.099	139.625	8.5038	11.4968	10.9853	366.692	239.784	217.267	7.51697	11.4395	11.2153	4.54304	11.5003	48.0655
VIT_17s0000g07120	96.7566	142.843	120.436	81.7513	91.7319	85.7379	58.6752	59.5396	59.3428	50.0602	93.8332	138.377	70.8424	91.3539	95.8414	43.05	53.8026	51.0301
VIT_00s0429g00040	104.853	84.3462	83.3507	19.9517	13.6443	27.529	139.928	151.486	137.728	8.14414	18.4977	65.8574	153.041	127.589	79.2945	97.3402	68.2626	104.053
VIT_05s0062g00790	66.3796	61.7781	56.4632	57.0381	65.6262	64.6088	18.1988	24.6631	20.6503	243.162	242.966	148.545	49.3774	73.5411	65.8383	49.3022	102.502	69.1026
VIT_19s0015g02700	21.7237	18.2315	17.9447	326.368	465.836	409.874	5.62591	5.85643	13.5212	25.2011	24.2711	27.2876	10.9231	18.5906	20.8317	37.0348	13.8192	16.411
VIT_03s0063g01870	92.5835	120.414	125.226	85.9021	78.4508	98.8717	56.0592	78.4987	92.3886	35.5961	42.9396	140.952	92.5233	113.562	125.715	19.6375	31.1069	48.3293
VIT_00s1674g00010	141.151	136.452	131.27	49.187	42.3694	50.1892	90.241	78.0218	83.3637	77.7886	77.1664	77.5356	68.3901	59.5884	49.4362	96.5315	97.9771	71.3247
VIT_19s0085g00040	108.092	129.304	151.249	104.568	109.617	123.341	64.0743	71.5264	79.0084	64.213	56.7731	79.6767	57.9157	68.1565	69.3538	48.9586	46.0184	45.9401
VIT_14s0066g01020	79.4369	62.0898	61.4967	124.207	137.759	117.095	71.3256	65.8835	60.718	141.48	136.702	59.8751	63.7256	64.0717	56.5825	53.9565	60.0884	60.9923
VIT_01s0137g00010	93.0166	143.755	121.727	64.9412	75.474	67.8449	40.4026	44.0609	42.8994	68.6816	103.62	121.117	75.7599	100.744	102.491	65.9848	85.2391	57.9097
VIT_05s0020g00700	62.1493	52.7061	50.0508	93.7341	104.97	96.2078	29.6811	30.0295	28.6201	238.81	197.462	85.4844	48.626	59.7898	46.0628	97.4615	80.191	73.1749
VIT_12s0059g02470	83.0909	90.5772	87.2802	86.9422	93.2289	85.1882	85.2209	77.9987	84.9783	68.136	74.2353	96.9868	71.2076	91.8273	96.4729	63.4805	65.1226	71.8962
VIT_01s0011g04830	128.26	153.78	143.978	48.6438	43.8236	52.6006	124.168	108.594	108.982	21.5964	27.0391	97.347	45.6427	59.7754	55.2637	75.8166	68.4078	107.99
VIT_05s0094g00530	58.0546	58.2138	69.4648	88.7299	86.4037	88.8243	68.724	69.5341	78.7876	109.286	90.3548	173.415	57.6035	67.9006	68.0074	53.6391	61.7261	120.967
VIT_04s0008g05330	69.4473	65.007	67.5823	84.9751	85.2278	87.0397	73.3524	75.7244	67.5916	121.088	90.7115	76.6376	85.0045	80.7535	86.2663	89.7268	82.7912	79.7892
VIT_06s0080g01100	131.333	139.047	145.009	61.32	55.7982	72.7902	88.2354	71.016	86.8827	34.6135	45.8852	108.38	48.1603	75.2194	67.9152	86.6353	62.7279	87.6294
VIT_13s0067g02130	20.9115	33.4322	34.0338	158.145	104.902	104.355	196.824	214.663	267.197	16.7829	13.1328	25.745	50.807	103.787	99.7794	4.98159	7.54267	9.78282
VIT_11s0016g05520	180.566	196.072	181.445	28.3272	36.8431	49.6394	61.6381	65.7715	56.5137	44.9028	67.7453	99.4419	73.1902	95.7205	86.2029	55.8302	47.2034	37.2536
VIT_05s0020g04210	19.1237	21.1972	22.723	34.5686	32.8934	35.1898	37.8483	49.6826	43.9603	314.407	232.149	128.73	40.9788	37.042	42.8648	101.582	156.932	111.922
VIT_02s0025g04340	169.238	269.253	217.073	13.8139	11.9637	43.2804	50.2248	81.6391	79.4877	41.1227	26.0627	95.8296	33.0294	62.7154	172.761	10.773	56.3988	29.1084
VIT_16s0013g00390	33.3997	39.4722	45.8648	120.249	136.106	134.394	13.3614	15.1928	16.8615	161.575	214.571	189.927	54.5451	86.3465	87.8646	35.6392	46.5549	30.6966
VIT_06s0004g07230	24.4385	23.0831	18.3371	84.912	99.4225	75.0012	225.843	178.563	191.458	76.901	79.903	139.53	10.0177	28.3969	47.4552	11.2262	20.6222	127.314
VIT_02s0025g05080	114.86	119.422	99.0285	125.985	165.897	135.061	31.6671	33.7518	37.7876	90.2763	97.0822	78.4966	47.9942	78.7111	66.363	51.99	48.8652	39.1721
VIT_11s0016g02680	61.6642	55.9381	59.985	81.1797	88.7014	82.2279	87.4994	79.7912	74.7588	126.819	97.5385	83.1244	81.138	83.1219	101.327	69.1658	81.6225	65.5837
VIT_11s0016g00650	75.1611	76.7514	73.201	110.371	137.186	102.377	58.7474	62.874	52.4319	65.2065	65.7851	67.9041	85.6336	96.3	119.881	66.3242	73.277	71.7181
VIT_04s0023g01690	48.5589	37.4234	31.7358	89.434	85.758	79.0831	90.0762	73.5982	68.9131	73.1767	155.104	90.7476	109.443	129.067	63.1607	88.8215	70.5782	74.8698
VIT_17s0000g03720	61.6505	84.8899	108.93	131.554	92.0689	103.072	28.3392	40.5498	30.071	68.3959	72.6638	198.177	95.846	146.442	62.6614	47.3968	36.3604	49.8023
VIT_03s0063g00060	23.0856	30.5461	22.973	91.8562	141.405	119.519	20.0298	19.003	12.215	357.337	358.971	116.967	15.9167	22.9254	24.6414	17.3519	26.422	37.441
VIT_01s0011g02470	116.787	141	126.681	39.4724	37.6492	45.2628	59.3288	60.4236	63.5242	64.084	79.5328	122.45	55.4497	68.4361	73.3966	102.662	95.8915	106.486
VIT_02s0025g03530	30.9058	23.25	28.7667	51.0686	52.6603	55.4198	81.1168	71.286	72.3898	143.757	102.285	207.78	49.7244	53.7797	98.6211	57.0004	62.0098	216.342
VIT_06s0004g07920	93.0743	83.3918	87.6184	108.036	109.882	110.215	137.231	128.918	129.583	52.2167	50.162	39.676	63.3916	68.206	80.7009	36.2357	37.0052	42.5804
VIT_08s0040g03300	134.676	155.086	159.132	41.7679	39.9211	59.4382	55.1704	51.1641	58.8993	26.3675	47.7278	103.747	96.3883	120.481	114.281	66.7493	55.1249	71.7865
VIT_14s0030g01680	87.2404	88.5195	93.098	48.0893	52.7109	65.7316	42.2121	42.6562	44.8781	94.4207	114.024	143.292	95.9627	111.55	124.898	63.6315	73.0388	71.8793
VIT_11s0052g00590	91.5568	105.205	100.774	76.7412	88.3552	95.6742	40.029	47.1666	45.3998	92.546	98.787	161.441	52.5311	72.9941	76.5212	50.7615	68.2245	92.4829
VIT_14s0083g00160	75.6101	114.495	106.748	75.8039	85.7926	76.8415	53.0145	59.6077	71.4471	82.2091	92.9406	126.772	68.0287	84.3547	107.48	56.218	62.3399	57.316
VIT_08s0056g00690	68.561	63.6533	63.4307	99.9376	112.966	91.453	88.9787	91.6492	77.7677	89.637	90.4482	82.1166	69.1531	68.2655	78.5124	67.6535	72.2125	79.9541
VIT_08s0217g00020	67.8885	63.1707	64.2258	116.633	124.132	107.899	86.4723	83.7743	84.7124	95.6881	80.6587	74.5044	56.4076	64.4952	83.53	64.3297	71.5267	66.0402
VIT_16s0100g01280	62.6407	80.6435	73.0836	67.4673	72.1638	74.898	42.3361	43.9588	46.4188	66.7373	73.3691	99.1304	139.487	191.778	205	30.4566	48.9018	36.8856
VIT_05s0020g04420	6.97873	9.13304	11.1037	28.144	36.2978	32.4769	1.07119	1.18942	2.68587	499.572	384.818	155.39	66.9692	59.7695	39.4011	31.6343	68.1972	19.462
VIT_05s0094g01120	89.7201	94.468	86.0378	83.7829	72.8446	68.8939	104.53	106.054	110.839	87.2321	89.6535	66.0134	39.907	39.3635	44.6752	95.8046	100.212	72.967
VIT_12s0034g02390	61.2013	41.8636	46.6021	120.019	139.093	114.018	94.6521	94.5819	86.816	91.2737	78.0662	53.3883	35.8415	33.3853	32.4268	109.72	115.614	103.938
VIT_04s0023g02380	70.647	53.9815	69.2728	10.0301	9.9565	19.2385	52.2354	53.33	51.7559	65.4458	70.5443	169.967	71.6758	84.5062	97.0598	189.19	124.412	188.826
VIT_09s0002g02530	58.0803	52.4668	47.1215	123.64	141.071	128.141	47.5298	44.9989	49.986	152.738	139.455	99.2083	49.7555	51.2227	42.6168	73.9926	64.6625	83.9337
VIT_02s0012g01330	63.3048	51.2262	49.7642	123.489	132.104	105.516	54.6046	55.3991	55.8372	152.907	112.044	70.3053	92.3128	77.1177	70.3115	57.1565	61.2241	64.6221
VIT_08s0007g00040	124.659	140.712	186.23	54.3025	77.5385	70.9947	46.4461	49.982	53.8434	107.422	110.494	122.39	42.0439	44.6578	53.5502	58.3363	45.5593	59.4254
VIT_17s0000g02860	67.9017	60.4028	59.0898	65.709	66.007	66.6369	82.797	78.8214	76.7926	114.776	91.636	107.256	91.618	80.9926	92.021	79.0253	78.5924	88.2636
VIT_06s0004g08180	73.407	82.9637	90.5158	116.447	121.341	116.542	56.284	60.5148	62.1455	96.1527	94.0146	89.2081	56.9355	64.3344	82.9915	57.0879	60.251	65.1721
VIT_05s0077g01430	145.523	99.4838	105.678	96.1594	95.6004	93.7145	98.7309	87.9125	86.522	84.2555	72.9852	62.2444	53.3732	43.4764	40.2847	59.4526	54.357	65.6461
VIT_18s0072g00710	64.8333	109.446	99.6424	63.4713	63.6235	71.9443	41.445	40.8565	44.2216	83.2643	105.32	196.68	76.2035	106.732	130.815	35.7171	57.9425	52.122
VIT_10s0003g03130	66.4354	74.3262	78.6677	90.8291	98.1349	83.2678	72.9818	71.917	79.2104	85.9602	93.5394	107.643	70.3771	88.8794	107.758	57.3358	61.3538	54.9165
VIT_18s0164g00040	46.711	37.8941	42.7644	145.882	172.139	140.001	29.4169	31.3759	31.4555	183.55	149.921	120.792	41.7001	50.1728	39.2321	53.6602	60.9242	65.7969
VIT_09s0002g00980	68.2122	84.5035	78.955	91.035	76.3273	75.5366	67.1618	69.2313	75.8557	101.856	91.6713	95.8879	76.8006	88.2976	102.933	55.1495	74.0976	69.2718
VIT_05s0020g04980	84.8237	64.5012	67.6838	92.6855	94.0362	91.5167	83.8058	76.3941	78.5298	96.9635	79.2286	63.8654	69.6513	73.0627	52.206	93.5422	80.7822	99.3342
VIT_11s0016g04770	25.8552	32.6585	30.2696	43.8334	56.8401	51.8156	16.5568	17.0538	16.0126	189.388	310.264	220.212	66.5765	112.804	116.385	33.0717	49.9716	53.0274
VIT_12s0035g01020	72.9558	74.3855	78.0003	84.3026	107.709	89.1137	37.9903	38.9857	33.8333	168.093	124.478	85.3926	89.3925	89.7517	116.282	46.199	53.4108	51.4805
VIT_04s0079g00410	20.9836	13.2354	17.4327	59.7857	57.8522	51.827	334.91	312.275	309.356	69.8335	43.7643	23.886	12.0374	7.01623	6.88386	38.6475	29.3662	32.1509
VIT_01s0011g06540	75.0444	64.5771	63.8067	81.1904	90.6251	70.2204	77.2483	75.3921	74.1172	85.2951	83.8201	89.7933	93.8561	71.0805	85.5325	79.7652	86.5743	93.1428
VIT_11s0016g03350	85.2175	102.436	109.839	16.9524	20.3195	34.9575	45.8742	49.9775	49.5682	92.6828	97.1652	76.5111	76.801	83.1722	112.8	117.499	197.612	69.2073
VIT_07s0005g00500	74.6433	101.589	103.753	81.0505	98.7701	96.6247	49.2044	54.2953	43.2751	82.2968	112.709	118.908	68.0488	92.5777	105.196	46.9731	53.1891	53.88
VIT_18s0072g00770	220.328	152.026	165.038	39.7651	44.5869	60.697	93.0308	74.9361	79.6542	26.2238	34.4302	22.5827	54.6446	52.5054	38.6949	126.938	100.38	50.513
VIT_12s0055g00460	67.316	58.1232	48.1689	58.0887	67.9764	57.5836	49.3249	54.6507	54.9309	148.297	153.616	131.24	62.409	71.0067	62.3291	90.0527	102.456	99.0952
VIT_16s0013g00620	55.7104	47.8229	50.2546	57.301	58.0635	47.5468	85.4541	81.7893	70.7204	73.9505	72.6689	150.558	81.131	86.7897	101.286	86.5167	83.8719	144.606
VIT_07s0031g01730	89.2857	103.755	91.4169	94.8351	99.2661	88.5762	68.2904	68.3299	62.1392	62.1344	76.0447	82.2882	57.456	65.6216	75.4346	86.413	82.9744	81.7691
VIT_17s0000g07730	81.8412	66.8885	83.6482	29.7142	29.609	31.9508	154.139	174.401	178.766	50.397	74.8738	89.0456	56.9465	69.7319	70.4985	81.3864	53.4928	57.9114
VIT_05s0094g01570	66.0732	69.5239	65.2226	64.8465	56.8027	61.1415	33.7733	31.649	29.7057	99.3974	108.361	101.549	55.5927	69.513	47.0184	160.868	194.273	118.549
VIT_04s0008g06930	135.646	134.507	122.113	27.73	30.4771	34.6577	43.7872	50.5147	52.1459	20.0245	40.7606	89.1299	55.5326	80.963	97.2766	145.599	111.139	161.227
VIT_18s0001g05810	54.2455	80.6035	69.7334	134.046	146.672	136.044	45.3774	42.7517	41.5187	89.3055	111.348	107.039	48.2343	62.6349	79.6562	50.4114	57.3609	74.8017
VIT_18s0001g14630	51.5957	55.9874	59.6178	195.283	256.958	182.06	20.4047	25.8488	26.7962	110.527	49.9685	75.5916	86.1764	72.8291	60.798	22.4893	42.1632	36.1814
VIT_07s0005g02100	59.0303	63.7845	59.5952	42.1801	50.6238	55.4226	36.774	31.8565	34.6496	232.755	184.089	181.1	49.3036	69.5509	59.6233	60.2369	67.1706	92.9696
VIT_16s0098g00290	86.724	60.9095	62.3217	96.1224	87.3957	89.477	273.896	240.907	241.04	11.8697	12.3394	11.4231	19.6808	18.9584	12.1238	43.8621	31.5444	29.1083
VIT_07s0031g00200	97.0452	89.3725	89.0746	72.8646	72.1509	62.328	80.135	80.7029	74.3584	69.5468	71.6571	87.795	86.3242	96.2505	122.596	58.7123	55.4528	62.9884
VIT_08s0007g03870	27.6683	30.2602	46.554	27.6815	29.4285	35.0922	76.4352	80.8546	78.4151	117.524	297.947	147.507	63.076	96.6864	131.852	49.0429	32.0405	61.2573
VIT_11s0052g01280	208.811	197.339	164.994	68.1303	54.9721	88.9806	10.3491	8.029	10.1767	84.927	218.093	100.029	39.6656	68.4727	53.5427	12.6346	28.3964	10.8739
VIT_14s0108g01520	42.9274	43.2188	41.165	74.6933	94.8883	80.1329	15.666	16.9382	16.8955	259.711	230.885	140.869	50.8782	58.5348	44.6361	53.5134	76.44	84.5734
VIT_03s0038g04600	71.9909	90.5488	76.0614	73.1946	77.9951	68.6746	50.8755	55.4434	52.5526	91.6504	116.273	120.091	78.7912	88.8589	98.1252	67.823	76.8842	70.2163
VIT_19s0090g00390	100.502	132.952	122.208	56.2342	68.1581	72.3933	64.3503	62.2246	57.5066	63.0879	74.2026	93.1863	83.8589	108.774	115.157	44.8678	57.203	48.2423
VIT_13s0156g00180	36.2769	50.8727	42.2105	54.4194	53.4787	49.6266	49.5186	49.2186	48.6644	179.817	117.166	199.042	71.6763	70.6922	94.0835	50.4813	63.547	143.539
VIT_14s0108g00080	74.2616	65.8387	70.4615	89.6493	99.059	81.4888	78.9481	85.615	88.4567	85.6788	80.0299	89.9192	80.1208	72.2622	75.5446	61.716	67.0537	76.3931
VIT_00s0508g00030	89.5836	124.514	97.1946	75.3854	91.6698	85.1912	47.0829	49.3061	48.1662	91.7802	137.817	136.962	50.7353	66.203	81.3364	35.8549	49.8973	63.3957
VIT_06s0004g02410	21.5385	18.3505	17.6816	207.714	297.816	261.827	10.7795	13.3428	11.953	205.229	211.565	41.5672	16.7815	20.0244	17.1684	15.2465	13.098	18.9451
VIT_05s0049g01660	106.794	83.0931	83.4292	83.6294	82.5375	81.6641	101.9	89.288	84.8813	53.6308	65.7194	78.8431	80.0319	83.423	79.1379	59.7035	57.9635	63.6811
VIT_00s1328g00020	20.7949	62.1984	41.1166	81.8567	91.8972	73.2585	62.4048	69.7624	86.7767	100.777	120.579	319.756	25.8139	37.3977	62.8177	15.0176	70.8261	76.0708
VIT_08s0007g00200	28.3649	40.8223	32.1183	31.651	34.5848	36.2354	7.02535	6.94755	6.1024	290.561	335.79	294.543	40.6081	72.5194	62.2358	17.5565	33.952	45.8255
VIT_13s0019g02330	137.906	136.186	115.394	66.0708	57.8328	63.5372	53.1984	52.2752	57.1664	29.356	42.2983	64.8023	147.818	121.647	102.881	68.2907	63.0969	37.2247
VIT_18s0001g08030	79.3888	71.9242	75.8952	129.04	164.703	144.345	28.3515	29.4276	27.2871	86.3404	64.802	58.8682	79.0196	78.0564	60.7412	64.2682	108.041	65.8073
VIT_18s0001g01270	52.0351	51.8742	58.2609	98.0569	88.6921	69.6246	34.3229	34.0226	34.6855	104.593	95.217	47.9149	170.571	107.019	94.6311	99.6321	112.987	59.319
VIT_11s0016g04850	103.457	97.448	83.8428	85.5054	95.8257	75.7829	53.4131	62.2925	57.3098	76.688	92.8996	82.3669	72.4675	74.4162	69.3857	80.9912	72.2365	76.2391
VIT_07s0130g00350	54.0099	47.1248	56.5671	113.323	122.486	107.972	65.7866	69.2747	63.3046	136.49	100.833	74.0902	62.0169	62.9267	68.7827	68.3894	81.3879	56.6108
VIT_01s0150g00160	75.7856	84.7673	81.8098	84.2918	99.3616	87.1989	70.2505	73.3592	71.7825	93.0739	94.0483	93.3695	57.8913	63.5705	71.7092	67.2674	66.2089	75.0351
VIT_02s0025g05050	60.2804	59.3142	54.5498	78.285	88.5019	79.5217	25.1918	27.1776	29.9693	115.341	163.993	112.566	72.2312	99.7817	90.9192	81.6284	95.1048	75.7451
VIT_18s0157g00210	86.7812	65.3439	63.9558	61.5248	71.8031	73.3526	102.313	89.865	91.4056	90.2205	100.113	93.4194	34.457	28.7486	27.0379	98.3346	72.0362	157.761
VIT_07s0005g02260	71.7619	58.7558	57.3463	68.8565	69.2829	61.0284	68.6767	61.8542	63.1829	84.7036	72.826	78.089	105.424	94.3124	93.5125	97.0075	93.7694	108.067
VIT_01s0026g00280	80.3382	55.3199	58.245	111.337	125.888	100.187	93.4197	91.1873	89.9466	105.411	75.3304	58.0014	35.9791	58.2799	42.4839	70.1957	66.4436	89.4013
VIT_07s0197g00240	166.162	119.858	149.599	10.6807	12.9622	34.5657	183.128	209.408	200.862	14.3404	14.8163	29.7096	25.7239	28.8605	29.4358	74.4898	54.693	47.7868
VIT_06s0004g03690	153.461	128.592	127.852	54.1871	59.2307	54.8475	93.8546	85.0713	83.9982	20.1428	24.9502	26.4236	47.0663	42.9919	33.7342	161.521	119.831	89.2554
VIT_11s0016g05120	65.172	63.6698	56.5555	97.0073	114.293	93.7979	62.4459	61.4206	60.0871	112.056	118.892	96.682	63.0995	67.9998	66.2639	68.3595	64.8646	74.2375
VIT_11s0103g00490	78.5831	71.1015	70.0826	73.4599	86.6218	77.9122	26.9745	29.9205	29.6944	154.931	158.006	145.778	41.6359	63.3652	57.587	73.688	78.9592	88.5794
VIT_18s0001g09960	73.5029	79.9157	76.5493	79.1612	85.5998	82.3478	78.0351	77.5594	75.3973	74.0492	84.929	93.131	78.9834	73.3363	81.2044	66.6199	71.3536	74.6473
VIT_05s0077g02140	51.149	39.1578	38.8963	114.514	128.508	97.1174	73.3024	77.5484	80.4286	72.0351	50.9159	92.9336	88.2022	88.557	96.1392	48.4229	57.6973	110.529
VIT_02s0025g03270	57.3179	36.6306	38.5838	75.171	62.7478	59.2731	126.547	111.042	120.255	89.0285	53.0618	62.9104	104.228	76.429	75.5422	87.0363	85.7077	84.3735
VIT_14s0068g01500	173.66	161.824	169.511	49.2683	59.6945	74.2433	38.5946	51.903	46.0691	116.198	171	132.869	8.10101	20.0872	19.1178	34.1362	32.3856	47.1195
VIT_12s0028g01810	60.5374	55.8699	51.3822	90.3939	98.0699	82.4402	73.6316	70.2897	73.2366	107.585	110.872	108.048	67.6779	60.8321	62.8259	75.6357	71.6723	84.7434
VIT_12s0028g01110	118.917	88.0758	96.0655	60.1167	54.8071	67.7032	144.209	129.139	131.338	19.6493	17.5473	22.4642	100.912	105.216	91.2416	73.297	46.9706	38.0239
VIT_19s0085g01100	68.2601	53.1557	62.5184	155.606	207.28	152.568	65.9855	61.8026	65.4389	66.5177	33.7673	45.0693	43.5286	44.4119	37.9204	82.7408	79.653	78.8305
VIT_16s0050g02560	106.959	89.8135	91.6318	62.8602	64.7248	78.8824	39.3895	42.5962	45.3209	103.563	100.187	77.9778	89.1034	86.0813	67.8496	98.7103	80.7533	78.3107
VIT_05s0020g04680	46.0105	46.5567	34.4743	84.8	53.9984	68.1254	43.7984	34.96	38.7498	166.557	206.102	136.747	150.469	127.273	56.8284	11.9398	79.8211	16.4667
VIT_12s0035g00340	6.31225	7.17323	13.7638	228.806	258.768	199.444	43.392	37.787	52.8398	68.4775	163.079	118.082	28.9775	48.0829	47.5199	28.3867	31.203	19.4241
VIT_00s0301g00090	10.589	23.1476	18.5879	3.50707	3.04879	4.68217	1.72331	2.21437	2.34374	461.854	435.806	272.287	21.3303	30.6035	21.7212	11.6934	20.9583	55.2216
VIT_18s0001g04980	51.2923	42.1127	36.7146	101.551	94.082	97.1923	107.359	95.3586	94.7361	117.69	89.7513	49.1055	59.188	48.6989	47.8298	57.178	73.0158	137.951
VIT_06s0004g04230	97.1248	115.88	115.383	94.0836	91.7711	81.5661	87.7008	101.011	104.39	26.1633	42.1788	47.8479	70.9139	69.1349	86.7317	57.5356	45.8837	63.2132
VIT_08s0007g06230	91.3689	115.849	113.858	64.0938	71.3867	66.5341	53.9927	58.3957	57.596	64.1847	92.1015	95.2319	81.5919	92.8664	104.913	50.5726	68.3018	55.5688
VIT_09s0002g01600	91.4935	82.7003	74.4093	88.4278	91.2138	79.866	78.4067	78.1385	83.8796	57.3403	57.9318	86.598	83.3839	90.0985	86.4557	60.1156	63.1768	64.5922
VIT_01s0011g03410	58.8424	52.8737	55.9472	95.6277	91.5214	80.9381	71.8688	73.5969	75.9735	88.2741	75.8091	85.0545	95.0703	98.4389	90.8456	66.4325	67.1814	72.1774
VIT_18s0001g07500	63.6412	56.0034	53.0439	161.355	209.423	160.663	32.3275	32.883	31.7563	97.6487	74.8983	60.2088	44.3706	65.3915	46.48	64.5256	66.8458	74.4949
VIT_17s0000g06280	339.076	263.875	285.778	18.4586	17.7633	58.0827	66.2444	68.0155	63.1872	8.77576	7.2678	3.64944	40.9669	21.7795	15.2693	59.3558	34.2581	23.7604
VIT_01s0011g00680	67.7688	94.5018	93.56	76.1056	99.4337	95.3378	44.4796	40.8426	42.0188	108.452	126.394	123.528	62.1924	89.6999	111.338	38.4952	45.9659	35.4416
VIT_09s0054g01770	141.985	95.771	102.994	51.9509	53.1646	50.7464	123.407	104.296	91.5909	23.8311	24.0082	24.8916	54.4472	32.0901	23.1469	182.562	133.235	80.5922
VIT_01s0010g02900	55.3344	56.6506	63.3536	47.7749	56.2035	48.6732	49.473	48.1113	45.674	107.639	119.69	147.48	96.5452	96.5485	114.058	67.5512	78.8804	92.3198
VIT_05s0049g01500	104.389	111.016	107.353	67.6214	67.6897	72.297	90.8057	89.8888	79.0796	36.8909	37.056	55.3988	83.2942	91.736	112.123	62.1421	64.4408	58.7249
VIT_07s0141g00730	73.1021	65.3927	78.8588	45.2597	44.5412	46.8009	74.917	84.8703	89.6959	52.1325	62.1486	135.533	80.2243	78.8585	117.974	80.5093	59.402	121.414
VIT_04s0044g00520	93.1639	157.573	131.827	69.3366	82.7583	91.2913	36.0076	42.8243	38.5967	69.3417	80.4117	122.279	62.7455	82.2199	92.826	44.3572	48.76	45.2569
VIT_19s0090g00460	41.1055	29.9694	29.0888	62.9657	62.3633	51.6631	87.1412	80.3095	82.5744	130.253	77.47	120.343	70.2939	50.3346	54.3248	79.2921	90.0263	190.126
VIT_11s0016g03190	17.8775	18.3049	22.2313	50.7873	63.7554	58.338	8.42128	9.49687	9.80354	109.235	167.827	269.793	74.6923	141.897	121.864	96.2941	54.9905	93.7613
VIT_12s0035g01350	84.4821	71.6568	78.0106	74.8568	79.5634	74.7013	95.7626	110.111	106.756	68.042	65.9559	63.6548	58.0623	54.4702	50.1658	89.551	91.7397	68.674
VIT_15s0024g00800	41.6734	40.761	34.4909	23.8189	24.2784	27.812	54.1494	49.9992	49.2788	74.7579	125.313	239.243	50.7912	69.7982	61.0843	131.771	120.59	165.581
VIT_17s0000g07560	24.0561	26.3355	24.1323	107.351	112.548	92.5832	62.9194	83.2555	57.3489	201.003	167.155	48.0751	54.2706	54.5396	53.9994	58.8723	108.467	48.0023
VIT_06s0061g00540	53.5928	56.0171	67.4789	100.962	103.678	99.3689	31.882	37.381	36.6587	183.022	156.125	104.597	58.0854	68.4829	65.5041	47.7025	50.7988	63.2864
VIT_14s0060g02280	58.338	58.0059	62.1369	108.431	121.676	97.7185	61.4259	70.0055	70.0772	89.7536	77.0296	80.4809	77.9303	80.0914	82.2046	54.6568	64.8646	68.5497
VIT_09s0002g06000	51.1206	65.7349	47.5234	49.5948	54.295	50.1822	53.8965	54.6505	45.9638	73.8446	122.848	156.383	93.7415	105.863	134.847	69.8064	88.4584	64.0612
VIT_02s0012g01960	42.2732	42.3729	33.6435	36.9651	46.9301	46.4433	3.38135	4.07989	3.86479	295.924	312.325	185.951	36.0486	57.9998	41.9181	55.4817	65.7333	70.5962
VIT_08s0058g01100	21.037	22.1297	23.481	40.3019	44.8125	42.8957	32.1293	33.4457	37.9719	270.705	258.854	259.546	41.0526	58.9227	74.7893	21.5635	34.0334	64.0513
VIT_03s0088g01190	291.458	217.831	210.325	9.98549	13.885	32.9341	68.464	57.9565	43.1631	21.7125	25.6405	13.5159	79.45	58.424	33.036	104.489	65.8622	32.5611
VIT_07s0031g01970	58.0057	52.6009	52.8058	108.061	115.302	99.4279	80.035	76.7739	88.1502	92.1946	73.5303	68.8145	78.1245	75.5339	78.3139	55.3479	58.1849	69.3458
VIT_07s0005g00070	170.659	171.306	168.026	54.4897	52.1732	64.1713	74.4429	74.6537	71.8128	32.8054	39.4814	60.1027	64.0668	70.3426	62.0944	56.1916	47.6882	45.9187
VIT_06s0004g01090	78.1752	61.1819	62.6907	91.4068	101.921	92.8917	71.9214	66.0483	67.1951	123.427	108.428	78.6562	61.0265	58.5715	60.6727	59.541	64.8735	71.5958
VIT_06s0004g06880	71.5432	79.4452	74.6984	88.0418	87.3424	83.2235	60.3892	53.9457	58.4042	49.9816	82.0986	109.722	84.62	113.886	120.727	55.222	50.1078	55.9838
VIT_08s0040g01430	69.3347	112.648	91.3912	75.2426	95.5211	67.5608	44.4948	45.8346	44.5706	67.5148	117.159	133.276	66.1071	90.7388	96.7996	49.7813	59.3191	52.0002
VIT_02s0241g00140	81.6405	136.71	107.126	77.9331	93.4849	76.181	45.7153	47.3708	44.033	51.581	89.5071	110.737	77.4618	88.8951	96.9859	47.6064	53.7491	52.1197
VIT_02s0154g00300	1.13421	2.67826	8.72594	25.9588	29.2157	21.5869	1.99544	2.86511	12.6439	2.70424	9.81005	2.998	606.929	301.24	215.677	43.1525	84.1028	5.30887
VIT_18s0001g14450	232.012	173.534	196.95	20.4915	18.2588	41.8635	81.8621	74.3422	63.5083	16.7732	18.7184	8.54239	40.3667	22.0168	6.53456	193.156	114.439	54.9822
VIT_05s0020g05050	34.7392	29.134	26.5543	48.1921	55.2336	47.912	216.882	180.73	195.467	15.2184	17.4278	67.9226	65.6608	53.2451	52.7113	84.656	65.9027	120.721
VIT_00s0179g00300	114.052	111.989	97.1051	77.558	82.7889	77.137	111.353	116.223	103.578	27.7654	29.2055	61.7835	58.4336	59.802	57.1891	58.3411	61.8934	70.4094
VIT_05s0020g02850	105.191	119.394	126.172	68.0351	86.0845	73.6116	62.6595	61.5236	59.0708	59.5351	77.5364	95.5917	60.272	71.4715	79.9666	55.0495	58.4457	55.9108
VIT_05s0094g01530	36.0201	40.783	40.8021	73.7175	64.5042	64.5716	41.6668	46.2132	47.8115	174	296.517	188.399	48.3609	60.5061	58.861	23.92	24.5706	44.1227
VIT_15s0046g00490	74.2962	55.3471	47.7011	88.5559	88.7745	70.5347	90.7319	108.595	91.6283	59.8575	58.4342	108.036	48.5341	58.2264	74.1386	66.5072	65.0705	119.18
VIT_11s0016g04390	63.9097	50.873	56.9401	108.151	140.292	116.311	55.5147	55.5865	50.2941	143.235	90.2895	71.1863	58.3784	59.0087	62.3384	54.3324	64.7888	71.5858
VIT_13s0067g03140	73.8456	69.0267	78.1286	51.6424	36.3076	48.8666	61.279	61.5168	60.1085	59.3409	106.33	103.89	68.1483	106.961	128.298	99.2016	74.8384	85.2763
VIT_08s0007g07340	85.2495	86.9911	84.7062	115.163	130.153	107.689	50.3943	51.7649	52.3216	82.1831	77.7008	60.1158	73.4552	73.4777	66.48	63.1681	58.9481	52.6597
VIT_18s0001g11810	68.2278	60.5501	68.9501	107.6	90.9279	92.7873	84.61	81.6288	82.866	49.8643	45.3623	46.8792	80.0032	67.6221	66.6103	116.788	89.6942	71.3856
VIT_18s0001g02260	68.6648	86.7364	86.2839	51.3564	54.6819	47.8478	49.5132	56.2038	59.3705	85.8263	113.576	126.191	80.7464	91.3129	114.114	49.2134	75.7232	74.8279
VIT_06s0004g00040	81.4627	88.7704	85.1298	89.0047	96.9212	92.6548	54.9296	60.6306	59.5462	70.7838	82.2414	81.5849	83.2554	107.524	108.678	36.6025	48.9074	43.136
VIT_01s0011g00420	110.431	87.4862	83.4693	49.7447	62.4182	55.736	46.8336	49.1791	45.2157	91.9721	110.11	63.1895	56.5854	62.5295	63.5314	111.853	106.436	113.392
VIT_01s0011g01050	67.6837	58.5089	58.5957	81.1062	86.4703	77.3366	64.9446	81.8004	73.6496	90.6397	62.9857	74.9593	51.3394	44.6756	38.8749	97.8846	157.228	101.37
VIT_01s0011g03680	103.43	115.552	112.179	57.6065	46.9802	59.574	66.2757	66.2288	64.4921	17.3825	32.7952	101.499	130.132	162.383	154.962	14.1399	21.0728	41.2376
VIT_18s0001g06400	58.438	71.0483	72.8361	3.00075	3.0542	8.9756	11.1993	12.9167	18.1887	120.122	223.751	355.611	26.1919	37.253	47.6384	92.6396	67.1361	135.803
VIT_11s0052g00540	64.6907	70.1961	81.0413	109.051	118.304	103.247	102.259	120.825	132.228	16.3943	28.3703	22.3623	51.5477	99.3371	200.813	8.37537	22.3683	14.3323
VIT_06s0009g02790	54.5696	43.7941	48.0231	89.8421	82.8018	75.5953	89.6108	88.6452	93.6251	99.399	73.5004	102.612	63.1517	63.0002	61.6923	59.1638	66.7146	107.712
VIT_18s0001g07210	64.205	46.3171	55.2685	56.2741	44.0899	52.3606	68.1198	60.0722	62.7706	52.7113	68.1332	111.04	107.589	93.167	85.4496	114.628	114.293	105.194
VIT_11s0037g00490	54.5226	43.0756	41.0606	116.699	117.591	103.112	80.7085	70.1966	73.076	113.178	84.6074	69.9668	80.0744	71.5751	68.5174	51.9265	50.098	71.5112
VIT_09s0002g07530	69.5975	49.8985	51.6691	45.12	34.8997	36.8977	120.947	115.554	122.517	51.8559	24.3847	62.1109	79.6057	43.718	55.5982	141.755	110.518	144.738
VIT_03s0063g00080	63.0419	48.011	45.8811	87.5347	91.9481	79.7681	54.233	50.4631	51.095	160.217	127.446	76.6881	68.1124	62.3577	49.7863	76.9072	83.7267	84.027
VIT_02s0025g02990	66.2912	96.7505	90.897	70.9622	85.6345	84.4002	41.8177	38.3254	37.9879	85.3932	104.978	121.32	79.6855	115.389	136.319	25.3201	44.3682	34.8716
VIT_01s0011g06130	67.8764	98.8805	82.5151	74.1413	91.7527	79.3752	46.6554	45.9206	51.7599	69.6717	109.407	132.52	76.0434	75.7943	89.4834	50.2741	60.1973	57.5462
VIT_01s0010g03700	71.817	66.6895	56.4155	91.5931	99.1293	85.8817	82.4807	72.7927	72.8435	63.516	75.2445	81.6993	77.2343	91.5778	85.0395	57.8206	63.1012	64.7397
VIT_05s0049g00140	47.8283	45.8304	49.1236	26.0737	29.2235	25.6922	73.3943	81.6448	87.9365	72.4118	97.8001	150.385	34.4821	54.1873	60.7331	185.42	102.754	134.396
VIT_05s0049g00520	18.6361	62.0277	44.5803	63.1634	49.7538	33.4944	47.4159	104.78	141.445	12.6567	46.6835	72.8799	27.1395	42.938	38.783	2.98415	213.894	335.53
VIT_19s0090g00850	98.2228	71.321	82.5267	108.723	141.789	125.583	102.715	86.1491	91.232	82.381	63.8922	30.4227	43.6919	42.5071	30.3157	57.1411	45.5796	53.6534
VIT_12s0028g02000	105.089	107.954	101.86	89.9591	83.1965	82.4196	118.488	138.807	124.461	16.1658	10.392	11.0157	99.2669	96.3388	93.7672	27.0202	35.3039	15.6171
VIT_08s0007g04570	11.7355	16.6097	19.3119	89.5309	97.2564	100.51	9.31526	13.0909	14.2477	276.893	186.558	138.513	46.9037	59.4401	54.9701	61.0085	71.1888	89.8779
VIT_16s0050g01150	5.26899	2.05061	2.78729	317.159	435.709	339.978	21.381	25.751	13.6029	4.58689	4.54831	2.84083	3.49963	5.37102	4.1388	41.4285	35.6183	90.9335
novel.146	29.4686	65.6444	57.3982	75.478	126.21	108.406	1.66119	3.11265	1.30907	237.787	397.801	170.444	6.98818	26.1433	29.0765	3.72071	7.17235	8.68234
VIT_14s0108g00010	83.4837	85.0048	78.3224	85.7781	92.0487	84.5137	71.8269	67.4682	60.3434	76.8729	90.522	71.8587	69.1061	67.6103	68.4035	76.9074	67.776	58.4084
VIT_10s0003g02060	13.0445	12.8781	13.907	113.876	145.817	106.021	18.4161	18.7719	20.423	322.898	309.903	52.5615	38.588	55.0397	37.8965	16.9025	39.5543	18.2973
VIT_11s0052g00680	141.127	141.636	154.788	37.0712	38.6518	48.7348	72.9711	62.8065	61.3732	21.099	27.2761	54.8524	87.3766	88.9084	80.376	93.806	80.2362	60.5124
VIT_13s0019g00520	73.3474	84.5222	78.297	61.6241	67.8361	58.7984	47.6486	53.3363	55.4379	66.2745	85.649	113	99.0805	96.8027	103.133	59.2904	70.5847	78.4746
VIT_08s0007g05070	79.1785	100.515	89.3763	80.4334	83.4509	66.447	56.8781	56.7174	58.8061	54.2383	96.4213	128.602	56.5331	78.1344	104.267	48.937	49.6916	63.8316
VIT_12s0134g00430	70.408	60.8377	57.8965	78.0159	99.5777	72.9944	57.1376	63.6829	55.7281	82.0069	83.4968	73.1032	96.1454	95.4175	95.9593	63.7883	77.6572	68.0196
VIT_02s0025g02490	15.1907	16.9961	28.4548	64.6599	64.2637	75.2106	21.3739	20.3475	17.7914	189.983	193.242	241.758	69.8818	111.371	72.744	58.5667	40.8824	48.9243
VIT_09s0070g00050	56.9918	79.7743	65.6078	91.6451	115.985	87.8908	67.6356	66.4259	60.9389	90.0364	108.013	93.5348	48.7409	70.6285	92.7682	46.0913	60.7936	47.9306
VIT_01s0137g00670	38.9103	38.3436	49.5173	54.1671	64.4884	58.0825	7.42719	11.9874	10.3243	246.014	247.767	220.569	24.012	29.3047	28.9742	61.9798	81.8409	77.0782
VIT_08s0007g06480	94.4927	93.1123	95.9524	51.4995	61.6324	56.5614	36.6101	37.3393	31.1345	51.5985	57.4608	81.9088	156.9	176.841	171.05	34.9581	35.098	26.6095
VIT_18s0001g13370	65.0677	70.1615	78.6921	156.97	191.517	185.774	39.1672	36.0448	34.4203	71.8665	54.1231	77.5223	50.3037	61.9536	57.431	33.6516	44.545	40.4659
VIT_07s0104g00160	72.6381	111.102	91.5355	52.4746	66.3885	58.6201	66.0338	67.852	56.5509	59.1941	108.054	125.74	53.4959	92.3459	106.537	51.7888	50.3777	58.6408
VIT_07s0141g00020	41.5667	43.047	36.1833	55.9127	60.552	53.2558	49.9026	52.3492	54.2659	173.963	120.477	83.2869	110.312	113.33	111.1	57.6411	72.3158	59.0432
VIT_08s0040g01910	86.9003	130.578	116.789	64.8976	77.8434	75.5442	46.5511	55.0337	55.2302	58.4898	88.4269	112.767	61.0669	86.0116	85.5204	45.0048	49.8228	50.3922
VIT_07s0005g02620	63.4699	58.6239	63.8464	98.4143	100.473	99.9637	78.3463	73.301	74.7768	114.384	86.0305	74.2284	67.5033	67.9661	71.3978	48.6958	54.1689	51.2476
VIT_05s0051g00450	79.5604	75.9927	76.9846	38.8335	49.6025	47.1614	47.2611	45.951	40.861	155.203	197.501	96.9437	59.6213	71.0146	73.7514	72.3908	63.0903	54.4343
VIT_01s0011g04350	55.9813	61.9125	57.2351	73.0191	65.5882	67.2829	77.9775	84.0027	86.483	76.1698	73.2807	107.291	76.8693	95.8184	111.884	37.0204	60.7167	77.4684
VIT_04s0008g00630	56.6587	69.6945	67.9789	91.4415	91.7239	97.3702	56.782	59.5527	65.6017	79.9752	64.321	119.344	74.6711	88.1841	92.8528	47.4044	53.7512	67.8474
VIT_07s0005g02990	100.759	137.28	100.768	61.4032	69.2521	70.8469	50.643	48.3859	45.6023	50.0652	74.6188	125.214	69.9328	99.0722	95.0126	35.7385	55.9755	54.4144
VIT_14s0066g01900	138.343	158.635	150.224	60.2517	61.0173	74.1572	70.5769	63.6189	65.1858	37.272	33.0345	53.7343	58.8262	64.8686	49.6292	81.5306	64.7146	58.7938
VIT_09s0002g01750	46.0276	62.3543	51.6105	98.9785	118.937	116.283	52.8762	68.9047	69.8746	97.5284	105.621	150.389	38.2529	56.6875	54.1519	36.4345	50.9843	66.7696
VIT_18s0001g08120	119.522	163.227	157.289	80.7612	87.4371	96.7875	61.3424	59.6883	59.574	37.6913	45.2041	69.5656	50.5915	73.8606	79.397	28.7082	33.1598	38.1681
VIT_03s0091g00310	23.4125	32.4978	36.1528	25.6733	15.6751	27.7473	51.9942	67.2619	87.9997	110.118	106.582	168.2	72.1528	76.9334	131.172	66.3203	123.601	117.961
VIT_07s0104g00540	90.7343	146.953	111.617	71.8244	67.4026	62.185	47.4678	44.8537	46.0169	48.6233	106.997	83.4486	82.6282	82.2543	77.9375	58.1296	69.5949	41.5638
VIT_01s0011g02180	53.8789	48.9467	51.7618	68.3163	76.4529	62.1644	89.381	83.3934	71.5452	129.648	81.2515	66.6703	91.708	87.4491	101.43	56.5505	63.436	55.9684
VIT_02s0025g00180	80.3277	86.3867	77.5284	81.2753	80.281	69.6883	56.9816	60.6083	54.7203	78.1388	104.132	31.0607	29.8024	27.1049	20.7653	161.203	153.366	85.7636
VIT_06s0004g03180	58.0834	47.5471	48.6941	106.935	108.319	96.5662	82.1444	73.7005	75.5293	91.5246	91.021	85.4892	48.213	52.2935	43.5988	71.3343	65.0357	93.0049
VIT_07s0005g02410	157.309	130.332	143.128	33.3201	33.083	49.2465	42.4953	38.8801	33.9866	44.8036	56.8618	55.7644	104.082	103.954	92.9179	87.3206	69.7837	61.328
VIT_15s0046g00260	80.4241	65.2936	72.2292	143.196	149.626	123.876	81.7959	80.2282	78.8796	53.5778	46.0718	42.9776	47.7106	47.0315	36.8619	61.0828	48.9679	78.3733
VIT_19s0015g01070	76.2753	94.6175	83.8476	96.2368	93.4486	91.0517	56.4746	57.7486	55.9406	50.218	81.5366	107.681	60.5932	82.0172	89.7883	47.1103	56.5936	55.8826
VIT_14s0081g00030	31.4025	104.954	51.0515	49.777	31.9461	57.4874	120.153	213.568	215.672	18.3464	18.7947	53.8395	16.886	39.9705	129.233	7.10367	69.7442	107.008
VIT_18s0001g08580	193.885	170.694	152.915	29.1389	20.4021	47.7338	26.4343	24.5218	31.9615	98.517	123.841	47.1469	71.8004	70.0133	70.2426	52.7917	72.1567	32.6383
VIT_16s0050g02450	43.2613	40.2235	46.2159	99.9152	117.033	95.0066	21.6074	24.4487	23.5556	143.31	148.557	102.531	53.7072	60.7076	48.0104	83.7774	84.1967	100.021
VIT_18s0001g09700	44.6356	57.7486	42.9762	99.5588	94.4895	88.323	37.6979	40.348	44.9031	220.705	241.968	41.1648	52.1115	54.9676	49.0438	38.1214	58.5203	28.1474
VIT_18s0001g05730	83.5286	82.3676	76.4432	62.0955	70.6998	62.1874	47.2852	43.488	40.4853	101.719	119.164	72.4789	63.1067	65.0239	62.9156	107.851	91.7906	81.4281
VIT_06s0080g00550	58.5258	51.249	54.6718	82.4098	89.374	73.9413	54.1411	59.0546	59.501	101.451	115.713	109.815	64.3407	68.1166	74.0377	67.4096	71.2218	79.0133
VIT_03s0091g00480	49.3192	46.5089	40.325	12.552	15.043	18.7118	26.4663	25.3425	20.5162	63.7415	110.118	151.932	72.2743	110.012	87.2218	163.574	173.231	146.952
VIT_04s0008g06150	100.613	120.999	138.536	72.704	80.8546	81.9562	142.266	129.792	137.234	29.7206	33.2751	28.4671	35.0551	61.7517	60.6079	22.7015	32.6139	24.4679
VIT_04s0069g01010	5.44192	16.1699	9.13184	19.6231	15.2874	16.3924	20.0767	36.6365	43.4589	183.099	167.048	293.804	42.6261	62.3245	118.117	52.5401	74.7779	156.974
VIT_08s0007g04170	48.4268	39.6473	42.1691	93.1153	84.4797	74.5007	86.5839	79.4698	75.8002	78.2335	76.5714	70.0695	79.6779	67.1609	72.3582	77.474	76.4731	110.97
VIT_05s0062g01060	58.9632	52.7189	56.5584	106.06	110.65	97.0923	67.5575	67.7074	70.8518	61.4347	58.0829	82.0043	76.2467	75.5656	68.536	70.4756	70.0663	82.3271
VIT_05s0136g00260	1.19996	18.0955	8.56467	24.2675	14.7055	12.1792	10.3673	24.8402	39.2377	36.4631	47.9317	50.6652	34.0145	39.7614	56.0641	98.655	255.785	560.008
VIT_14s0068g00520	69.8148	78.5261	73.4362	118.559	119.27	100.618	46.6851	46.2602	47.2436	78.3583	114.971	59.2726	71.4408	73.9599	64.6641	62.0682	63.2114	43.6393
VIT_03s0097g00560	59.9642	48.6363	64.7149	67.6761	80.7356	79.7696	52.1442	45.623	40.067	133.561	110.828	87.8981	71.6675	77.8115	68.2714	86.1637	63.1619	93.148
VIT_19s0085g00990	91.1971	119.047	111.069	64.6344	60.7252	77.8615	44.4917	50.7047	42.7498	64.2708	79.1915	124.479	66.6644	91.1073	105.174	43.9924	48.9969	44.8706
VIT_18s0001g07200	61.0995	62.262	57.6524	68.0545	65.3562	60.069	53.3465	52.4822	56.1286	63.6364	74.2114	120.992	86.3683	86.3908	82.398	96.2411	94.2969	89.4084
VIT_17s0000g05650	172.794	197.998	202.247	19.6926	21.066	30.6346	41.8279	39.4636	40.1551	12.0804	22.4326	34.4472	101.924	92.1966	81.4717	105.595	73.0287	41.1014
VIT_19s0015g00390	57.3713	87.9928	71.5219	105.231	128.306	109.344	48.0605	47.8093	46.6312	64.8821	92.0913	95.4154	56.8161	77.8775	76.5995	53.1674	58.241	52.591
VIT_04s0043g00760	65.0678	53.5397	52.0132	96.8284	101.779	83.5443	74.6754	67.2907	66.8034	84.5498	69.248	79.7957	68.9597	49.6149	51.4768	85.89	77.2839	100.757
VIT_05s0020g04690	124.069	121.945	103.997	99.1534	89.9679	117.391	64.0807	64.286	47.9225	47.0913	68.0594	54.4078	90.8302	103.55	66.3553	23.493	33.1288	9.31695
VIT_04s0023g02900	4.58945	7.38429	6.58103	84.8463	87.5085	86.1999	38.5762	57.8427	71.9588	159.039	129.157	91.9796	61.9284	69.737	120.651	79.4783	86.5443	84.67
VIT_01s0137g00420	59.5378	64.3187	64.5105	51.0546	53.5613	49.4715	51.5865	55.7301	53.4341	98.0028	100.648	101.66	94.4799	100.055	111.679	70.1463	80.9407	67.5598
VIT_01s0026g00910	54.6259	66.9539	62.7837	21.8981	13.1194	35.2049	17.2014	33.2904	29.4189	66.9686	121.199	326.768	35.397	85.1649	101.637	71.297	80.1648	105.221
VIT_10s0092g00050	113.513	130.996	155.443	44.1729	47.0786	58.1441	70.9082	64.1822	63.1634	43.696	44.5358	71.5382	77.2149	75.2188	81.358	70.3348	63.1717	53.6019
VIT_08s0007g04900	63.1454	85.483	84.3435	77.4101	76.0366	70.9582	37.6333	49.2466	50.0183	75.2487	100.441	115.782	60.9391	88.3489	121.675	57.6346	65.3053	47.6851
VIT_02s0025g01020	26.909	20.4982	21.7191	220.927	272.281	190.594	18.9539	13.3252	21.0466	100.401	153.811	79.9427	18.3202	35.3234	24.6676	29.669	30.4376	47.4811
VIT_17s0000g06030	55.0355	61.2245	70.3135	37.6804	46.6611	48.9205	51.5773	58.1822	48.4266	115.038	106.408	115.347	97.7365	126.206	140.504	47.5253	53.8654	44.3472
VIT_01s0026g01630	87.3394	80.623	84.1032	72.59	79.2348	74.9292	106.606	97.6895	101.857	56.5513	58.2452	68.6089	62.337	61.0472	60.6677	55.2231	53.924	61.9739
VIT_18s0041g01900	76.4135	76.1167	72.4176	59.0644	62.541	56.3217	88.0744	85.3315	75.1389	77.8355	77.9179	70.1363	86.4888	86.9537	109.698	57.2509	59.9473	44.5235
VIT_10s0003g03510	42.6678	54.5011	56.7883	163.055	166.793	152.363	37.5635	37.2275	33.9319	54.2762	47.2597	102.452	34.2545	34.4284	46.6195	60.7175	68.6877	128.17
VIT_19s0014g02480	84.157	69.6567	72.1563	69.4582	80.9697	72.6162	84.3374	82.4938	75.2728	75.8926	64.2275	72.3691	67.0191	62.9673	76.2068	64.2328	72.8435	74.7962
VIT_00s0225g00010	16.6904	19.2876	20.4788	106.658	152.727	123.551	35.9538	32.1922	32.4233	123.977	73.0396	175.163	53.0856	80.1501	101.401	15.5205	17.1585	141.913
VIT_11s0016g05900	41.515	45.7787	37.9673	107.295	111.712	90.0474	58.3081	66.0536	67.2438	102.262	75.2419	106.414	57.2493	49.7883	54.2715	66.2696	74.7185	107.822
VIT_18s0041g01350	90.8135	63.0544	67.2373	31.0061	28.9784	38.4018	89.7335	78.7924	88.203	16.645	15.9751	66.2769	136.679	124.263	116.172	84.15	71.5726	110.881
VIT_05s0020g01820	157.049	140.269	96.8259	92.8637	126.811	99.9871	38.0248	45.514	37.8319	14.6141	33.6736	23.0574	89.6648	115.223	79.3046	44.7778	53.1089	29.5558
VIT_17s0000g03620	84.6474	76.9788	81.9452	50.5237	56.5818	55.9673	61.1969	57.2804	50.2882	69.1214	80.9746	83.1676	98.5493	103.609	129.149	62.3909	60.9189	54.4605
[truncated: 30,250 more rows]

## Sheet: Table S4
Supplementary Table S4. Primers of qRT-PCR
Gene ID	Primers (5' to 3')
	Forward primer	Reverse primer
EF1-α(EC931777)	GAACTGGGTGCTTGATAGGC	ACCAAAATATCCGGAGTAAAAGA
VIT_00s0323g00100	ATGGAGGAAGCTTGTAGAAGTG	CTGCTGTTGAGTACATGAACAC
VIT_16s0013g00210	AATCTCCATTGATACACGAGCT	AATTGTGGTTCCTGCTTTAACC
VIT_07s0031g00050	GAAAGATCAAAGAAGTTGCGGT	CTGTATCGCAGTCTACTAGCTC
VIT_18s0041g02210	TCGCTAAACTGGAAGAGAAGTT	GCCTCAACGTCTTTTGAAGATT
VIT_18s0089g00270	TGAGTTTTAGAGGGGAAGACAC	CACCACCTTGAATGAGCATAAG
VIT_11s0016g03630	AAGGGCATTGATGAAATTCTGC	TTCACATCCTTGTTATCAGGGT
VIT_15s0048g02420	GTTTCATTGACAAAGACGGCTA	TGACGAACGAGGAATATGACAA
VIT_16s0100g00770	ACTGTTGTGTTGCATAGCATTC	CGAGAACTTGAAGTCTCATCCT
VIT_03s0063g01830	TTTGTTGAAGACGACGTTTCAG	CATTCTTAGAATGGTGATTACCCTC
VIT_04s0008g06600	GCGAAGAAGAAGGTTCAACAAT	GCTGAGTGCATCTAATCTTTGG

## Sheet: Table S5
Supplementary Table S5. Enriched Gene Ontology terms identified from the 664 DEGs in resistant (Kober 5BB) and susceptible (Zitian Seedless)
Category	GOID	Description	Count
BP	GO:0015979	photosynthesis	44
BP	GO:0009768	photosynthesis, light harvesting in photosystem I	16
BP	GO:0019684	photosynthesis, light reaction	26
BP	GO:0009765	photosynthesis, light harvesting	16
BP	GO:0018298	protein-chromophore linkage	16
BP	GO:0042542	response to hydrogen peroxide	14
BP	GO:0051259	protein oligomerization	13
BP	GO:0009416	response to light stimulus	25
BP	GO:0009314	response to radiation	25
BP	GO:0006091	generation of precursor metabolites and energy	32
BP	GO:0000302	response to reactive oxygen species	14
BP	GO:0006461	protein complex assembly	22
BP	GO:0070271	protein complex biogenesis	22
BP	GO:0009408	response to heat	17
BP	GO:0042548	regulation of photosynthesis, light reaction	5
BP	GO:0009266	response to temperature stimulus	20
BP	GO:0010109	regulation of photosynthesis	6
BP	GO:0043467	regulation of generation of precursor metabolites and energy	5
BP	GO:0071822	protein complex subunit organization	23
BP	GO:0010035	response to inorganic substance	23
BP	GO:0006970	response to osmotic stress	17
BP	GO:0009651	response to salt stress	16
BP	GO:0015995	chlorophyll biosynthetic process	5
BP	GO:0009697	salicylic acid biosynthetic process	4
BP	GO:0010337	regulation of salicylic acid metabolic process	4
BP	GO:0080142	regulation of salicylic acid biosynthetic process	4
BP	GO:0010207	photosystem II assembly	4
BP	GO:0006979	response to oxidative stress	19
BP	GO:0072330	monocarboxylic acid biosynthetic process	14
BP	GO:0046189	phenol-containing compound biosynthetic process	4
BP	GO:0006779	porphyrin-containing compound biosynthetic process	6
BP	GO:0009611	response to wounding	6
BP	GO:0009696	salicylic acid metabolic process	5
BP	GO:0009753	response to jasmonic acid	7
BP	GO:0009694	jasmonic acid metabolic process	5
BP	GO:0033014	tetrapyrrole biosynthetic process	6
BP	GO:2000022	regulation of jasmonic acid mediated signaling pathway	4
BP	GO:0018958	phenol-containing compound metabolic process	5
BP	GO:0006457	protein folding	15
BP	GO:0042537	benzene-containing compound metabolic process	6
BP	GO:0015994	chlorophyll metabolic process	5
BP	GO:0010112	regulation of systemic acquired resistance	3
BP	GO:0046148	pigment biosynthetic process	7
BP	GO:0010218	response to far red light	3
BP	GO:0006778	porphyrin-containing compound metabolic process	6
BP	GO:0006952	defense response	20
BP	GO:0033013	tetrapyrrole metabolic process	6
BP	GO:0010565	regulation of cellular ketone metabolic process	4
BP	GO:0009644	response to high light intensity	3
BP	GO:0031347	regulation of defense response	8
BP	GO:0042440	pigment metabolic process	7
BP	GO:0009867	jasmonic acid mediated signaling pathway	4
BP	GO:0017004	cytochrome complex assembly	4
BP	GO:0036003	positive regulation of transcription from RNA polymerase II promoter in response to stress	3
BP	GO:0061408	positive regulation of transcription from RNA polymerase II promoter in response to heat stress	3
BP	GO:0071395	cellular response to jasmonic acid stimulus	4
BP	GO:0046777	protein autophosphorylation	14
BP	GO:0043618	regulation of transcription from RNA polymerase II promoter in response to stress	3
BP	GO:0043620	regulation of DNA-templated transcription in response to stress	3
BP	GO:0080134	regulation of response to stress	10
BP	GO:0009767	photosynthetic electron transport chain	4
BP	GO:0009627	systemic acquired resistance	3
BP	GO:0032787	monocarboxylic acid metabolic process	18
BP	GO:0051300	spindle pole body organization	2
BP	GO:0009639	response to red or far red light	5
BP	GO:0002831	regulation of response to biotic stimulus	3
BP	GO:0008299	isoprenoid biosynthetic process	8
BP	GO:0032101	regulation of response to external stimulus	3
BP	GO:1901136	carbohydrate derivative catabolic process	5
BP	GO:0009607	response to biotic stimulus	12
BP	GO:0009773	photosynthetic electron transport in photosystem I	2
BP	GO:0033617	mitochondrial respiratory chain complex IV assembly	2
BP	GO:0097034	mitochondrial respiratory chain complex IV biogenesis	2
BP	GO:0043623	cellular protein complex assembly	9
BP	GO:0009637	response to blue light	3
BP	GO:0046434	organophosphate catabolic process	3
BP	GO:0008535	respiratory chain complex IV assembly	2
BP	GO:0072488	ammonium transmembrane transport	2
BP	GO:0019252	starch biosynthetic process	2
BP	GO:0070588	calcium ion transmembrane transport	4
BP	GO:0016053	organic acid biosynthetic process	16
BP	GO:0046394	carboxylic acid biosynthetic process	16
BP	GO:0043900	regulation of multi-organism process	3
BP	GO:0010243	response to organonitrogen compound	4
BP	GO:0072529	pyrimidine-containing compound catabolic process	2
BP	GO:0006816	calcium ion transport	4
BP	GO:0042343	indole glucosinolate metabolic process	4
BP	GO:0010114	response to red light	2
BP	GO:0015696	ammonium transport	2
BP	GO:0001934	positive regulation of protein phosphorylation	4
BP	GO:0009642	response to light intensity	3
BP	GO:0045088	regulation of innate immune response	3
BP	GO:0006720	isoprenoid metabolic process	8
BP	GO:0001101	response to acid chemical	17
BP	GO:0050776	regulation of immune response	3
BP	GO:0031407	oxylipin metabolic process	2
BP	GO:0031408	oxylipin biosynthetic process	2
BP	GO:0048583	regulation of response to stimulus	12
BP	GO:0002682	regulation of immune system process	3
BP	GO:0034605	cellular response to heat	4
BP	GO:0042327	positive regulation of phosphorylation	4
BP	GO:0010562	positive regulation of phosphorus metabolic process	4
BP	GO:0042180	cellular ketone metabolic process	4
BP	GO:0045937	positive regulation of phosphate metabolic process	4
BP	GO:0045036	protein targeting to chloroplast	2
BP	GO:0072596	establishment of protein localization to chloroplast	2
BP	GO:0009814	defense response, incompatible interaction	3
BP	GO:0006633	fatty acid biosynthetic process	6
BP	GO:0010411	xyloglucan metabolic process	3
BP	GO:0006833	water transport	2
BP	GO:0010200	response to chitin	2
BP	GO:0042044	fluid transport	2
BP	GO:0006986	response to unfolded protein	3
BP	GO:0034620	cellular response to unfolded protein	3
BP	GO:0005977	glycogen metabolic process	2
BP	GO:0006112	energy reserve metabolic process	2
BP	GO:0072598	protein localization to chloroplast	2
BP	GO:0048509	regulation of meristem development	2
BP	GO:0048581	negative regulation of post-embryonic development	2
BP	GO:0010016	shoot system morphogenesis	3
BP	GO:0042430	indole-containing compound metabolic process	4
BP	GO:0035672	oligopeptide transmembrane transport	3
BP	GO:1901698	response to nitrogen compound	6
BP	GO:0098542	defense response to other organism	8
BP	GO:0005982	starch metabolic process	2
BP	GO:0031023	microtubule organizing center organization	2
BP	GO:0043207	response to external biotic stimulus	9
BP	GO:0051707	response to other organism	9
BP	GO:0010876	lipid localization	5
BP	GO:0016114	terpenoid biosynthetic process	5
BP	GO:0009640	photomorphogenesis	2
BP	GO:0040011	locomotion	2
BP	GO:0045087	innate immune response	4
BP	GO:0046686	response to cadmium ion	3
BP	GO:0051186	cofactor metabolic process	13
BP	GO:0006955	immune response	4
BP	GO:1901617	organic hydroxy compound biosynthetic process	6
BP	GO:0006026	aminoglycan catabolic process	2
BP	GO:0006030	chitin metabolic process	2
BP	GO:0006032	chitin catabolic process	2
BP	GO:0010466	negative regulation of peptidase activity	2
BP	GO:0010951	negative regulation of endopeptidase activity	2
BP	GO:0045861	negative regulation of proteolysis	2
BP	GO:0046348	amino sugar catabolic process	2
BP	GO:0051241	negative regulation of multicellular organismal process	2
BP	GO:1901072	glucosamine-containing compound catabolic process	2
BP	GO:0016143	S-glycoside metabolic process	4
BP	GO:0019757	glycosinolate metabolic process	4
BP	GO:0019760	glucosinolate metabolic process	4
BP	GO:0006857	oligopeptide transport	3
BP	GO:0052548	regulation of endopeptidase activity	2
BP	GO:0009966	regulation of signal transduction	6
BP	GO:0045860	positive regulation of protein kinase activity	3
BP	GO:0098661	inorganic anion transmembrane transport	3
BP	GO:0016126	sterol biosynthetic process	2
BP	GO:0019722	calcium-mediated signaling	2
BP	GO:0052547	regulation of peptidase activity	2
BP	GO:0023051	regulation of signaling	6
BP	GO:0002376	immune system process	4
BP	GO:0010646	regulation of cell communication	6
BP	GO:0051188	cofactor biosynthetic process	7
BP	GO:0019932	second-messenger-mediated signaling	2
BP	GO:0033108	mitochondrial respiratory chain complex assembly	2
BP	GO:0044036	cell wall macromolecule metabolic process	6
BP	GO:0071310	cellular response to organic substance	15
BP	GO:0033674	positive regulation of kinase activity	3
BP	GO:0006739	NADP metabolic process	2
BP	GO:0016998	cell wall macromolecule catabolic process	2
BP	GO:0031098	stress-activated protein kinase signaling cascade	2
BP	GO:0051093	negative regulation of developmental process	2
BP	GO:1901071	glucosamine-containing compound metabolic process	2
BP	GO:0006721	terpenoid metabolic process	5
BP	GO:0006022	aminoglycan metabolic process	2
BP	GO:0035967	cellular response to topologically incorrect protein	3
BP	GO:1901615	organic hydroxy compound metabolic process	8
BP	GO:0032870	cellular response to hormone stimulus	10
BP	GO:0000038	very long-chain fatty acid metabolic process	1
BP	GO:0001666	response to hypoxia	1
BP	GO:0006072	glycerol-3-phosphate metabolic process	1
BP	GO:0009204	deoxyribonucleoside triphosphate catabolic process	1
BP	GO:0009264	deoxyribonucleotide catabolic process	1
BP	GO:0009626	plant-type hypersensitive response	1
BP	GO:0010496	intercellular transport	1
BP	GO:0015766	disaccharide transport	1
BP	GO:0015772	oligosaccharide transport	1
BP	GO:0015977	carbon fixation	1
BP	GO:0032845	negative regulation of homeostatic process	1
BP	GO:0034050	host programmed cell death induced by symbiont	1
BP	GO:0036293	response to decreased oxygen levels	1
BP	GO:0045337	farnesyl diphosphate biosynthetic process	1
BP	GO:0052646	alditol phosphate metabolic process	1
BP	GO:0031401	positive regulation of protein modification process	4
BP	GO:0071229	cellular response to acid chemical	8
BP	GO:0006874	cellular calcium ion homeostasis	2
BP	GO:0055074	calcium ion homeostasis	2
BP	GO:0072527	pyrimidine-containing compound metabolic process	3
BP	GO:0010410	hemicellulose metabolic process	4
BP	GO:0006004	fucose metabolic process	2
BP	GO:0001932	regulation of protein phosphorylation	5
BP	GO:0009755	hormone-mediated signaling pathway	9
BP	GO:0009143	nucleoside triphosphate catabolic process	1
BP	GO:0009200	deoxyribonucleoside triphosphate metabolic process	1
BP	GO:0010052	guard cell differentiation	1
BP	GO:0010103	stomatal complex morphogenesis	1
BP	GO:0010143	cutin biosynthetic process	1
BP	GO:0010506	regulation of autophagy	1
BP	GO:0045737	positive regulation of cyclin-dependent protein serine/threonine kinase activity	1
BP	GO:0045927	positive regulation of growth	1
BP	GO:0070482	response to oxygen levels	1
BP	GO:1904031	positive regulation of cyclin-dependent protein kinase activity	1
BP	GO:0006722	triterpenoid metabolic process	2
BP	GO:0016104	triterpenoid biosynthetic process	2
BP	GO:0035966	response to topologically incorrect protein	3
BP	GO:1901657	glycosyl compound metabolic process	6
BP	GO:0006869	lipid transport	4
BP	GO:0006855	drug transmembrane transport	3
BP	GO:0015893	drug transport	3
BP	GO:0042493	response to drug	3
BP	GO:0005978	glycogen biosynthetic process	1
BP	GO:0006734	NADH metabolic process	1
BP	GO:0009219	pyrimidine deoxyribonucleotide metabolic process	1
BP	GO:0009772	photosynthetic electron transport in photosystem II	1
BP	GO:0015936	coenzyme A metabolic process	1
BP	GO:0019915	lipid storage	1
BP	GO:0022412	cellular process involved in reproduction in multicellular organism	1
BP	GO:0034427	nuclear-transcribed mRNA catabolic process, exonucleolytic, 3'-5'	1
BP	GO:0045037	protein import into chloroplast stroma	1
BP	GO:0045338	farnesyl diphosphate metabolic process	1
BP	GO:0051701	interaction with host	1
BP	GO:0071470	cellular response to osmotic stress	1
BP	GO:0009926	auxin polar transport	2
BP	GO:0071495	cellular response to endogenous stimulus	10
BP	GO:0042908	xenobiotic transport	3
BP	GO:0042325	regulation of phosphorylation	5
BP	GO:0097164	ammonium ion metabolic process	2
BP	GO:0006631	fatty acid metabolic process	7
BP	GO:0010038	response to metal ion	4
BP	GO:0001708	cell fate specification	1
BP	GO:0006545	glycine biosynthetic process	1
BP	GO:0006772	thiamine metabolic process	1
BP	GO:0009166	nucleotide catabolic process	1
BP	GO:0009850	auxin metabolic process	1
BP	GO:0010315	auxin efflux	1
BP	GO:0042723	thiamine-containing compound metabolic process	1
BP	GO:0051346	negative regulation of hydrolase activity	3
BP	GO:0007623	circadian rhythm	2
BP	GO:0009914	hormone transport	2
BP	GO:0048511	rhythmic process	2
BP	GO:0060918	auxin transport	2
BP	GO:0009605	response to external stimulus	12
BP	GO:1901701	cellular response to oxygen-containing compound	10
BP	GO:0009251	glucan catabolic process	2
BP	GO:0042364	water-soluble vitamin biosynthetic process	2
BP	GO:0072503	cellular divalent inorganic cation homeostasis	2
BP	GO:0009617	response to bacterium	5
BP	GO:0000394	RNA splicing, via endonucleolytic cleavage and ligation	1
BP	GO:0006610	ribosomal protein import into nucleus	1
BP	GO:0009718	anthocyanin-containing compound biosynthetic process	1
BP	GO:0010325	raffinose family oligosaccharide biosynthetic process	1
BP	GO:0048015	phosphatidylinositol-mediated signaling	1
BP	GO:2000024	regulation of leaf development	1
BP	GO:0098656	anion transmembrane transport	6
BP	GO:0051347	positive regulation of transferase activity	3
BP	GO:0044247	cellular polysaccharide catabolic process	2
BP	GO:0035556	intracellular signal transduction	11
BP	GO:0006915	apoptotic process	1
BP	GO:0007205	protein kinase C-activating G-protein coupled receptor signaling pathway	1
BP	GO:0007276	gamete generation	1
BP	GO:0009394	2'-deoxyribonucleotide metabolic process	1
BP	GO:0009749	response to glucose	1
BP	GO:0019692	deoxyribose phosphate metabolic process	1
BP	GO:0048017	inositol lipid-mediated signaling	1
BP	GO:1901259	chloroplast rRNA processing	1
BP	GO:1901292	nucleoside phosphate catabolic process	1
BP	GO:0006073	cellular glucan metabolic process	7
BP	GO:0010383	cell wall polysaccharide metabolic process	4
BP	GO:0012501	programmed cell death	2
BP	GO:0019220	regulation of phosphate metabolic process	7
BP	GO:0051174	regulation of phosphorus metabolic process	7
BP	GO:0006040	amino sugar metabolic process	2
BP	GO:0015914	phospholipid transport	2
BP	GO:0032147	activation of protein kinase activity	2
BP	GO:0072507	divalent inorganic cation homeostasis	2
BP	GO:0009744	response to sucrose	1
BP	GO:0009746	response to hexose	1
BP	GO:0009800	cinnamic acid biosynthetic process	1
BP	GO:0009803	cinnamic acid metabolic process	1
BP	GO:0010216	maintenance of DNA methylation	1
BP	GO:0032844	regulation of homeostatic process	1
BP	GO:0033865	nucleoside bisphosphate metabolic process	1
BP	GO:0033875	ribonucleoside bisphosphate metabolic process	1
BP	GO:0034032	purine nucleoside bisphosphate metabolic process	1
BP	GO:0034284	response to monosaccharide	1
BP	GO:0048268	clathrin coat assembly	1
BP	GO:0045859	regulation of protein kinase activity	4
BP	GO:0070838	divalent metal ion transport	4
BP	GO:0009991	response to extracellular stimulus	3
BP	GO:0009110	vitamin biosynthetic process	2
BP	GO:0009119	ribonucleoside metabolic process	2
BP	GO:0006783	heme biosynthetic process	1
BP	GO:0034285	response to disaccharide	1
BP	GO:0042451	purine nucleoside biosynthetic process	1
BP	GO:0046129	purine ribonucleoside biosynthetic process	1
BP	GO:0046283	anthocyanin-containing compound metabolic process	1
BP	GO:0043549	regulation of kinase activity	4
BP	GO:0006334	nucleosome assembly	2
BP	GO:0046496	nicotinamide nucleotide metabolic process	4
BP	GO:0044042	glucan metabolic process	7
BP	GO:0019362	pyridine nucleotide metabolic process	4
BP	GO:0000291	nuclear-transcribed mRNA catabolic process, exonucleolytic	1
BP	GO:0000422	mitophagy	1
BP	GO:0009686	gibberellin biosynthetic process	1
BP	GO:0009691	cytokinin biosynthetic process	1
BP	GO:0009933	meristem structural organization	1
BP	GO:0010252	auxin homeostasis	1
BP	GO:0010928	regulation of auxin mediated signaling pathway	1
BP	GO:0019740	nitrogen utilization	1
BP	GO:0032868	response to insulin	1
BP	GO:0032869	cellular response to insulin stimulus	1
BP	GO:0043434	response to peptide hormone	1
BP	GO:0046470	phosphatidylcholine metabolic process	1
BP	GO:0048532	anatomical structure arrangement	1
BP	GO:0061726	mitochondrion disassembly	1
BP	GO:0071375	cellular response to peptide hormone stimulus	1
BP	GO:0071902	positive regulation of protein serine/threonine kinase activity	1
BP	GO:1901652	response to peptide	1
BP	GO:1901653	cellular response to peptide	1
BP	GO:0014070	response to organic cyclic compound	5
BP	GO:0009414	response to water deprivation	4
BP	GO:0072511	divalent inorganic cation transport	4
BP	GO:0009415	response to water	4
BP	GO:0006596	polyamine biosynthetic process	1
BP	GO:0009147	pyrimidine nucleoside triphosphate metabolic process	1
BP	GO:0009226	nucleotide-sugar biosynthetic process	1
BP	GO:0010374	stomatal complex development	1
BP	GO:0016032	viral process	1
BP	GO:0016575	histone deacetylation	1
BP	GO:0030245	cellulose catabolic process	1
BP	GO:0032781	positive regulation of ATPase activity	1
BP	GO:0042168	heme metabolic process	1
BP	GO:0043462	regulation of ATPase activity	1
BP	GO:0046131	pyrimidine ribonucleoside metabolic process	1
BP	GO:0051275	beta-glucan catabolic process	1
BP	GO:0080167	response to karrikin	1
BP	GO:0030162	regulation of proteolysis	2
BP	GO:0017038	protein import	4
BP	GO:0031497	chromatin assembly	2
BP	GO:0006213	pyrimidine nucleoside metabolic process	1
BP	GO:0006544	glycine metabolic process	1
BP	GO:0035435	phosphate ion transmembrane transport	1
BP	GO:0050821	protein stabilization	1
BP	GO:0043085	positive regulation of catalytic activity	6
BP	GO:0042742	defense response to bacterium	4
BP	GO:0009308	amine metabolic process	3
BP	GO:0072524	pyridine-containing compound metabolic process	4
BP	GO:0048507	meristem development	2
BP	GO:0006476	protein deacetylation	1
BP	GO:0009262	deoxyribonucleotide metabolic process	1
BP	GO:0019674	NAD metabolic process	1
BP	GO:0031221	arabinan metabolic process	1
BP	GO:0031222	arabinan catabolic process	1
BP	GO:0031331	positive regulation of cellular catabolic process	1
BP	GO:0042752	regulation of circadian rhythm	1
BP	GO:0045324	late endosome to vacuole transport	1
BP	GO:0045493	xylan catabolic process	1
BP	GO:0006875	cellular metal ion homeostasis	3
BP	GO:0008202	steroid metabolic process	4
BP	GO:0048366	leaf development	3
BP	GO:0006559	L-phenylalanine catabolic process	1
BP	GO:0042398	cellular modified amino acid biosynthetic process	1
BP	GO:0045165	cell fate commitment	1
BP	GO:0090481	pyrimidine nucleotide-sugar transmembrane transport	1
BP	GO:1902222	erythrose 4-phosphate/phosphoenolpyruvate family amino acid catabolic process	1
BP	GO:1902358	sulfate transmembrane transport	1
BP	GO:0000079	regulation of cyclin-dependent protein serine/threonine kinase activity	2
BP	GO:1904029	regulation of cyclin-dependent protein kinase activity	2
BP	GO:0044093	positive regulation of molecular function	6
BP	GO:1901565	organonitrogen compound catabolic process	6
BP	GO:0030003	cellular cation homeostasis	4
BP	GO:0000266	mitochondrial fission	1
BP	GO:0006607	NLS-bearing protein import into nucleus	1
BP	GO:0009685	gibberellin metabolic process	1
BP	GO:0010029	regulation of seed germination	1
BP	GO:0018230	peptidyl-L-cysteine S-palmitoylation	1
BP	GO:0018231	peptidyl-S-diacylglycerol-L-cysteine biosynthetic process from peptidyl-cysteine	1
BP	GO:0035601	protein deacylation	1
BP	GO:0044403	symbiosis, encompassing mutualism through parasitism	1
BP	GO:0006333	chromatin assembly or disassembly	2
BP	GO:0006606	protein import into nucleus	2
BP	GO:0044744	protein targeting to nucleus	2
BP	GO:1902593	single-organism nuclear import	2
BP	GO:0006733	oxidoreduction coenzyme metabolic process	4
BP	GO:0006098	pentose-phosphate shunt	1
BP	GO:0008272	sulfate transport	1
BP	GO:0016102	diterpenoid biosynthetic process	1
BP	GO:0018345	protein palmitoylation	1
BP	GO:0031109	microtubule polymerization or depolymerization	1
BP	GO:0051238	sequestering of metal ion	1
BP	GO:1901658	glycosyl compound catabolic process	1
BP	GO:2000028	regulation of photoperiodism, flowering	1
BP	GO:0006767	water-soluble vitamin metabolic process	2
BP	GO:0051170	nuclear import	2
BP	GO:0000226	microtubule cytoskeleton organization	4
BP	GO:0031399	regulation of protein modification process	7
BP	GO:0006084	acetyl-CoA metabolic process	1
BP	GO:0006595	polyamine metabolic process	1
BP	GO:0009896	positive regulation of catabolic process	1
BP	GO:0018198	peptidyl-cysteine modification	1
BP	GO:0031647	regulation of protein stability	1
BP	GO:0071249	cellular response to nitrate	1
BP	GO:0098732	macromolecule deacylation	1
BP	GO:1900140	regulation of seedling development	1
BP	GO:0008219	cell death	2
BP	GO:0008283	cell proliferation	2
BP	GO:0034504	protein localization to nucleus	2
BP	GO:0006873	cellular ion homeostasis	4
BP	GO:0032270	positive regulation of cellular protein metabolic process	4
BP	GO:0051338	regulation of transferase activity	4
BP	GO:0009409	response to cold	3
BP	GO:0015698	inorganic anion transport	3
BP	GO:0002229	defense response to oomycetes	2
BP	GO:0002239	response to oomycetes	2
BP	GO:0006612	protein targeting to membrane	2
BP	GO:0044743	protein transmembrane import into intracellular organelle	2
BP	GO:0006817	phosphate ion transport	1
BP	GO:0007186	G-protein coupled receptor signaling pathway	1
BP	GO:0009813	flavonoid biosynthetic process	1
BP	GO:0009965	leaf morphogenesis	1
BP	GO:0044764	multi-organism cellular process	1
BP	GO:0006914	autophagy	2
BP	GO:0006790	sulfur compound metabolic process	10
BP	GO:0016125	sterol metabolic process	3
BP	GO:1901699	cellular response to nitrogen compound	3
BP	GO:0051247	positive regulation of protein metabolic process	4
BP	GO:0006323	DNA packaging	2
BP	GO:0034728	nucleosome organization	2
BP	GO:0045787	positive regulation of cell cycle	2
BP	GO:0006558	L-phenylalanine metabolic process	1
BP	GO:0016036	cellular response to phosphate starvation	1
BP	GO:0030422	production of siRNA involved in RNA interference	1
BP	GO:0030968	endoplasmic reticulum unfolded protein response	1
BP	GO:0072531	pyrimidine-containing compound transmembrane transport	1
BP	GO:1902221	erythrose 4-phosphate/phosphoenolpyruvate family amino acid metabolic process	1
BP	GO:0006749	glutathione metabolic process	3
BP	GO:0023014	signal transduction by protein phosphorylation	2
BP	GO:0051235	maintenance of location	2
BP	GO:0022900	electron transport chain	6
BP	GO:0006662	glycerol ether metabolic process	1
BP	GO:0009074	aromatic amino acid family catabolic process	1
BP	GO:0010039	response to iron ion	1
BP	GO:0016246	RNA interference	1
BP	GO:0018904	ether metabolic process	1
BP	GO:0044419	interspecies interaction between organisms	1
BP	GO:0006694	steroid biosynthetic process	3
BP	GO:0006766	vitamin metabolic process	2
BP	GO:0007034	vacuolar transport	2
BP	GO:0009751	response to salicylic acid	2
BP	GO:0071900	regulation of protein serine/threonine kinase activity	2
BP	GO:2000026	regulation of multicellular organismal development	4
BP	GO:0042744	hydrogen peroxide catabolic process	3
BP	GO:0044275	cellular carbohydrate catabolic process	2
BP	GO:0010817	regulation of hormone levels	4
BP	GO:0006108	malate metabolic process	1
BP	GO:0009812	flavonoid metabolic process	1
BP	GO:0010150	leaf senescence	1
BP	GO:0015781	pyrimidine nucleotide-sugar transport	1
BP	GO:0090693	plant organ senescence	1
BP	GO:1903008	organelle disassembly	1
BP	GO:0008654	phospholipid biosynthetic process	3
BP	GO:0031667	response to nutrient levels	2
BP	GO:0048580	regulation of post-embryonic development	3
BP	GO:0009163	nucleoside biosynthetic process	1
BP	GO:0016101	diterpenoid metabolic process	1
BP	GO:0042455	ribonucleoside biosynthetic process	1
BP	GO:0090626	plant epidermis morphogenesis	1
BP	GO:0031668	cellular response to extracellular stimulus	2
BP	GO:0044264	cellular polysaccharide metabolic process	7
BP	GO:0009737	response to abscisic acid	5
BP	GO:0097305	response to alcohol	5
BP	GO:0000160	phosphorelay signal transduction system	2
BP	GO:0009116	nucleoside metabolic process	2
BP	GO:0046474	glycerophospholipid biosynthetic process	2
BP	GO:0007052	mitotic spindle organization	1
BP	GO:0080163	regulation of protein serine/threonine phosphatase activity	1
BP	GO:1902850	microtubule cytoskeleton organization involved in mitosis	1
BP	GO:0044092	negative regulation of molecular function	4
BP	GO:0051704	multi-organism process	12
BP	GO:0055082	cellular chemical homeostasis	4
BP	GO:0000045	autophagosome assembly	1
BP	GO:0006754	ATP biosynthetic process	1
BP	GO:0009225	nucleotide-sugar metabolic process	1
BP	GO:0009690	cytokinin metabolic process	1
BP	GO:0015985	energy coupled proton transport, down electrochemical gradient	1
BP	GO:0015986	ATP synthesis coupled proton transport	1
BP	GO:0031329	regulation of cellular catabolic process	1
BP	GO:0072348	sulfur compound transport	1
BP	GO:1905037	autophagosome organization	1
BP	GO:0015748	organophosphate ester transport	2
BP	GO:0071496	cellular response to external stimulus	2
BP	GO:0042743	hydrogen peroxide metabolic process	3
BP	GO:0006879	cellular iron ion homeostasis	1
BP	GO:0007568	aging	1
BP	GO:0009742	brassinosteroid mediated signaling pathway	1
BP	GO:0019682	glyceraldehyde-3-phosphate metabolic process	1
BP	GO:0030148	sphingolipid biosynthetic process	1
BP	GO:0043401	steroid hormone mediated signaling pathway	1
BP	GO:0048545	response to steroid hormone	1
BP	GO:0070816	phosphorylation of RNA polymerase II C-terminal domain	1
BP	GO:0071367	cellular response to brassinosteroid stimulus	1
BP	GO:0071383	cellular response to steroid hormone stimulus	1
BP	GO:0072583	clathrin-dependent endocytosis	1
BP	GO:0006575	cellular modified amino acid metabolic process	4
BP	GO:0051239	regulation of multicellular organismal process	4
BP	GO:1902582	single-organism intracellular transport	4
BP	GO:0009309	amine biosynthetic process	1
BP	GO:0034754	cellular hormone metabolic process	1
BP	GO:0042401	cellular biogenic amine biosynthetic process	1
BP	GO:0071417	cellular response to organonitrogen compound	1
BP	GO:0090627	plant epidermal cell differentiation	1
BP	GO:1902170	cellular response to reactive nitrogen species	1
BP	GO:0006732	coenzyme metabolic process	7
BP	GO:1901606	alpha-amino acid catabolic process	2
BP	GO:0006605	protein targeting	6
BP	GO:0009743	response to carbohydrate	1
BP	GO:0015780	nucleotide-sugar transport	1
BP	GO:0046128	purine ribonucleoside metabolic process	1
BP	GO:0051261	protein depolymerization	1
BP	GO:1905393	plant organ formation	1
BP	GO:0009733	response to auxin	5
BP	GO:0019725	cellular homeostasis	7
BP	GO:0009658	chloroplast organization	3
BP	GO:0003002	regionalization	1
BP	GO:0009648	photoperiodism	1
BP	GO:0031050	dsRNA fragmentation	1
BP	GO:0043331	response to dsRNA	1
BP	GO:0048573	photoperiodism, flowering	1
BP	GO:0070918	production of small RNA involved in gene silencing by RNA	1
BP	GO:0071359	cellular response to dsRNA	1
BP	GO:0009734	auxin-activated signaling pathway	2
BP	GO:0071365	cellular response to auxin stimulus	2
BP	GO:0006820	anion transport	8
BP	GO:0006650	glycerophospholipid metabolic process	3
BP	GO:0006220	pyrimidine nucleotide metabolic process	1
BP	GO:0019953	sexual reproduction	1
BP	GO:0051156	glucose 6-phosphate metabolic process	1
BP	GO:0003333	amino acid transmembrane transport	2
BP	GO:0044087	regulation of cellular component biogenesis	2
BP	GO:0007005	mitochondrion organization	4
BP	GO:0000272	polysaccharide catabolic process	4
BP	GO:0009145	purine nucleoside triphosphate biosynthetic process	1
BP	GO:0009206	purine ribonucleoside triphosphate biosynthetic process	1
BP	GO:0032786	positive regulation of DNA-templated transcription, elongation	1
BP	GO:0042278	purine nucleoside metabolic process	1
BP	GO:0009063	cellular amino acid catabolic process	2
BP	GO:0035304	regulation of protein dephosphorylation	2
BP	GO:0043666	regulation of phosphoprotein phosphatase activity	2
BP	GO:0006898	receptor-mediated endocytosis	1
BP	GO:0010167	response to nitrate	1
BP	GO:0055086	nucleobase-containing small molecule metabolic process	9
BP	GO:0008643	carbohydrate transport	2
BP	GO:0065002	intracellular protein transmembrane transport	2
BP	GO:1902580	single-organism cellular localization	4
BP	GO:0015711	organic anion transport	5
BP	GO:0072594	establishment of protein localization to organelle	5
BP	GO:0006623	protein targeting to vacuole	1
BP	GO:0008284	positive regulation of cell proliferation	1
BP	GO:0009739	response to gibberellin	1
BP	GO:0009741	response to brassinosteroid	1
BP	GO:0009894	regulation of catabolic process	1
BP	GO:0035194	posttranscriptional gene silencing by RNA	1
BP	GO:0043094	cellular metabolic compound salvage	1
BP	GO:0072665	protein localization to vacuole	1
BP	GO:0072666	establishment of protein localization to vacuole	1
BP	GO:2000031	regulation of salicylic acid mediated signaling pathway	1
BP	GO:0072522	purine-containing compound biosynthetic process	2
BP	GO:0098869	cellular oxidant detoxification	4
BP	GO:0010921	regulation of phosphatase activity	2
BP	GO:0071407	cellular response to organic cyclic compound	3
BP	GO:1990748	cellular detoxification	4
BP	GO:0030641	regulation of cellular pH	1
BP	GO:0051453	regulation of intracellular pH	1
BP	GO:0090698	post-embryonic plant morphogenesis	1
BP	GO:0033993	response to lipid	6
BP	GO:0048367	shoot system development	6
BP	GO:0035303	regulation of dephosphorylation	2
BP	GO:0030154	cell differentiation	6
BP	GO:0098754	detoxification	4
BP	GO:0051336	regulation of hydrolase activity	5
BP	GO:0015980	energy derivation by oxidation of organic compounds	3
BP	GO:0045454	cell redox homeostasis	3
BP	GO:0006900	membrane budding	1
BP	GO:0007389	pattern specification process	1
BP	GO:0009845	seed germination	1
BP	GO:0032515	negative regulation of phosphoprotein phosphatase activity	1
BP	GO:0035308	negative regulation of protein dephosphorylation	1
BP	GO:0090503	RNA phosphodiester bond hydrolysis, exonucleolytic	1
BP	GO:1901659	glycosyl compound biosynthetic process	1
BP	GO:0006865	amino acid transport	2
BP	GO:0006644	phospholipid metabolic process	4
BP	GO:0006099	tricarboxylic acid cycle	1
BP	GO:0006101	citrate metabolic process	1
BP	GO:0010923	negative regulation of phosphatase activity	1
BP	GO:0016441	posttranscriptional gene silencing	1
BP	GO:0035305	negative regulation of dephosphorylation	1
BP	GO:0009636	response to toxic substance	4
BP	GO:0071806	protein transmembrane transport	2
BP	GO:0006576	cellular biogenic amine metabolic process	1
BP	GO:0045944	positive regulation of transcription from RNA polymerase II promoter	5
BP	GO:0044724	single-organism carbohydrate catabolic process	3
BP	GO:0046467	membrane lipid biosynthetic process	2
BP	GO:0006406	mRNA export from nucleus	1
BP	GO:0009201	ribonucleoside triphosphate biosynthetic process	1
BP	GO:0016236	macroautophagy	1
BP	GO:0022603	regulation of anatomical structure morphogenesis	1
BP	GO:0030004	cellular monovalent inorganic cation homeostasis	1
BP	GO:0040008	regulation of growth	1
BP	GO:0044703	multi-organism reproductive process	1
BP	GO:0071427	mRNA-containing ribonucleoprotein complex export from nucleus	1
BP	GO:0009738	abscisic acid-activated signaling pathway	2
BP	GO:0048584	positive regulation of response to stimulus	2
BP	GO:1903825	organic acid transmembrane transport	2
BP	GO:1905039	carboxylic acid transmembrane transport	2
BP	GO:0006637	acyl-CoA metabolic process	1
BP	GO:0032784	regulation of DNA-templated transcription, elongation	1
BP	GO:0035383	thioester metabolic process	1
BP	GO:0072350	tricarboxylic acid metabolic process	1
BP	GO:0022411	cellular component disassembly	2
BP	GO:0090150	establishment of protein localization to membrane	2
BP	GO:0009070	serine family amino acid biosynthetic process	1
BP	GO:0051028	mRNA transport	1
BP	GO:0051084	'de novo' posttranslational protein folding	1
BP	GO:0051085	chaperone mediated protein folding requiring cofactor	1
BP	GO:0090351	seedling development	1
BP	GO:0045017	glycerolipid biosynthetic process	2
BP	GO:0065009	regulation of molecular function	11
BP	GO:0032268	regulation of cellular protein metabolic process	9
BP	GO:0071215	cellular response to abscisic acid stimulus	2
BP	GO:0097306	cellular response to alcohol	2
BP	GO:0072593	reactive oxygen species metabolic process	3
BP	GO:0009142	nucleoside triphosphate biosynthetic process	1
BP	GO:0032269	negative regulation of cellular protein metabolic process	3
BP	GO:0034655	nucleobase-containing compound catabolic process	3
BP	GO:0048827	phyllome development	3
BP	GO:0051248	negative regulation of protein metabolic process	3
BP	GO:0016050	vesicle organization	2
BP	GO:0098655	cation transmembrane transport	11
BP	GO:0009863	salicylic acid mediated signaling pathway	1
BP	GO:0048609	multicellular organismal reproductive process	1
BP	GO:0009117	nucleotide metabolic process	7
BP	GO:0009723	response to ethylene	1
BP	GO:0032504	multicellular organism reproduction	1
BP	GO:0042026	protein refolding	1
BP	GO:0044106	cellular amine metabolic process	1
BP	GO:0048278	vesicle docking	1
BP	GO:0071396	cellular response to lipid	3
BP	GO:0019748	secondary metabolic process	5
BP	GO:0051246	regulation of protein metabolic process	9
BP	GO:0071446	cellular response to salicylic acid stimulus	1
BP	GO:0072528	pyrimidine-containing compound biosynthetic process	1
BP	GO:0043086	negative regulation of catalytic activity	3
BP	GO:0009657	plastid organization	3
BP	GO:0042127	regulation of cell proliferation	1
BP	GO:0048868	pollen tube development	1
BP	GO:0006753	nucleoside phosphate metabolic process	7
BP	GO:0006906	vesicle fusion	1
BP	GO:0009066	aspartate family amino acid metabolic process	1
BP	GO:0009267	cellular response to starvation	1
BP	GO:0022406	membrane docking	1
BP	GO:0007067	mitotic nuclear division	3
BP	GO:0050793	regulation of developmental process	4
BP	GO:0043543	protein acylation	2
BP	GO:0046916	cellular transition metal ion homeostasis	1
BP	GO:0071241	cellular response to inorganic substance	1
BP	GO:0048589	developmental growth	2
BP	GO:0071214	cellular response to abiotic stimulus	1
BP	GO:0042445	hormone metabolic process	2
BP	GO:0048869	cellular developmental process	7
BP	GO:0006354	DNA-templated transcription, elongation	1
BP	GO:0006458	'de novo' protein folding	1
BP	GO:0006665	sphingolipid metabolic process	1
BP	GO:0046486	glycerolipid metabolic process	3
BP	GO:0050790	regulation of catalytic activity	10
BP	GO:0009127	purine nucleoside monophosphate biosynthetic process	1
BP	GO:0009168	purine ribonucleoside monophosphate biosynthetic process	1
BP	GO:0009247	glycolipid biosynthetic process	1
BP	GO:0009312	oligosaccharide biosynthetic process	1
BP	GO:0010563	negative regulation of phosphorus metabolic process	1
BP	GO:0045491	xylan metabolic process	1
BP	GO:0045936	negative regulation of phosphate metabolic process	1
BP	GO:0005976	polysaccharide metabolic process	9
BP	GO:0044272	sulfur compound biosynthetic process	2
BP	GO:0007051	spindle organization	1
BP	GO:0031669	cellular response to nutrient levels	1
BP	GO:0048646	anatomical structure formation involved in morphogenesis	1
BP	GO:0090174	organelle membrane fusion	1
BP	GO:0072657	protein localization to membrane	2
BP	GO:0006913	nucleocytoplasmic transport	3
BP	GO:0051169	nuclear transport	3
BP	GO:0006885	regulation of pH	1
BP	GO:0006897	endocytosis	1
BP	GO:0043624	cellular protein complex disassembly	1
BP	GO:0009888	tissue development	3
BP	GO:0006664	glycolipid metabolic process	1
BP	GO:0009735	response to cytokinin	1
BP	GO:0061077	chaperone-mediated protein folding	1
BP	GO:1903509	liposaccharide metabolic process	1
BP	GO:0031400	negative regulation of protein modification process	1
BP	GO:0042594	response to starvation	1
BP	GO:0043241	protein complex disassembly	1
BP	GO:0010154	fruit development	3
BP	GO:0065004	protein-DNA complex assembly	2
BP	GO:0055065	metal ion homeostasis	4
BP	GO:0031146	SCF-dependent proteasomal ubiquitin-dependent protein catabolic process	1
BP	GO:0006643	membrane lipid metabolic process	2
BP	GO:0007033	vacuole organization	1
BP	GO:0000413	protein peptidyl-prolyl isomerization	1
BP	GO:0009069	serine family amino acid metabolic process	1
BP	GO:0030001	metal ion transport	8
BP	GO:0090558	plant epidermis development	1
BP	GO:0033365	protein localization to organelle	5
BP	GO:0055080	cation homeostasis	5
BP	GO:0016197	endosomal transport	1
BP	GO:0044801	single-organism membrane fusion	1
BP	GO:0098771	inorganic ion homeostasis	5
BP	GO:0098662	inorganic cation transmembrane transport	9
BP	GO:0055067	monovalent inorganic cation homeostasis	1
BP	GO:0009072	aromatic amino acid family metabolic process	1
BP	GO:0009826	unidimensional cell growth	1
BP	GO:0071804	cellular potassium ion transport	1
BP	GO:0071805	potassium ion transmembrane transport	1
BP	GO:0007166	cell surface receptor signaling pathway	4
BP	GO:0007167	enzyme linked receptor protein signaling pathway	3
BP	GO:0007178	transmembrane receptor protein serine/threonine kinase signaling pathway	3
BP	GO:0006475	internal protein amino acid acetylation	1
BP	GO:0010228	vegetative to reproductive phase transition of meristem	1
BP	GO:0016573	histone acetylation	1
BP	GO:0018393	internal peptidyl-lysine acetylation	1
BP	GO:0018394	peptidyl-lysine acetylation	1
BP	GO:0034599	cellular response to oxidative stress	1
BP	GO:0006096	glycolytic process	1
BP	GO:0006757	ATP generation from ADP	1
BP	GO:0009060	aerobic respiration	1
BP	GO:0009156	ribonucleoside monophosphate biosynthetic process	1
BP	GO:0034219	carbohydrate transmembrane transport	1
BP	GO:0046031	ADP metabolic process	1
BP	GO:0071166	ribonucleoprotein complex localization	1
BP	GO:0071426	ribonucleoprotein complex export from nucleus	1
BP	GO:0046700	heterocycle catabolic process	3
BP	GO:0016052	carbohydrate catabolic process	5
BP	GO:0019318	hexose metabolic process	2
BP	GO:0009141	nucleoside triphosphate metabolic process	3
BP	GO:0006497	protein lipidation	1
BP	GO:0009152	purine ribonucleotide biosynthetic process	1
BP	GO:0042158	lipoprotein biosynthetic process	1
BP	GO:0061025	membrane fusion	1
BP	GO:0050801	ion homeostasis	5
BP	GO:0006813	potassium ion transport	1
BP	GO:0009135	purine nucleoside diphosphate metabolic process	1
BP	GO:0009179	purine ribonucleoside diphosphate metabolic process	1
BP	GO:0090501	RNA phosphodiester bond hydrolysis	3
BP	GO:0009699	phenylpropanoid biosynthetic process	1
BP	GO:0016579	protein deubiquitination	1
BP	GO:0042157	lipoprotein metabolic process	1
BP	GO:0006405	RNA export from nucleus	1
BP	GO:0018105	peptidyl-serine phosphorylation	1
BP	GO:0032984	macromolecular complex disassembly	1
BP	GO:0034976	response to endoplasmic reticulum stress	1
BP	GO:0045893	positive regulation of transcription, DNA-templated	7
BP	GO:0006081	cellular aldehyde metabolic process	1
BP	GO:0006164	purine nucleotide biosynthetic process	1
BP	GO:0007088	regulation of mitotic nuclear division	1
BP	GO:0009185	ribonucleoside diphosphate metabolic process	1
BP	GO:0018208	peptidyl-proline modification	1
BP	GO:0018209	peptidyl-serine modification	1
BP	GO:0048284	organelle fusion	1
BP	GO:0048831	regulation of shoot system development	1
BP	GO:0050832	defense response to fungus	1
BP	GO:1901264	carbohydrate derivative transport	1
BP	GO:0072521	purine-containing compound metabolic process	4
BP	GO:0071824	protein-DNA complex subunit organization	2
BP	GO:0090502	RNA phosphodiester bond hydrolysis, endonucleolytic	2
BP	GO:0009653	anatomical structure morphogenesis	4
BP	GO:0009250	glucan biosynthetic process	2
BP	GO:0009555	pollen development	1
BP	GO:0050657	nucleic acid transport	1
BP	GO:0050658	RNA transport	1
BP	GO:0051236	establishment of RNA localization	1
BP	GO:0060560	developmental growth involved in morphogenesis	1
BP	GO:0015849	organic acid transport	2
BP	GO:0046942	carboxylic acid transport	2
BP	GO:0006165	nucleoside diphosphate phosphorylation	1
BP	GO:0007010	cytoskeleton organization	4
BP	GO:0006473	protein acetylation	1
BP	GO:0031047	gene silencing by RNA	1
BP	GO:0048468	cell development	1
BP	GO:0006357	regulation of transcription from RNA polymerase II promoter	6
BP	GO:0009124	nucleoside monophosphate biosynthetic process	1
BP	GO:0045490	pectin catabolic process	1
BP	GO:0046939	nucleotide phosphorylation	1
BP	GO:0055072	iron ion homeostasis	2
BP	GO:0006470	protein dephosphorylation	4
BP	GO:1902680	positive regulation of RNA biosynthetic process	7
BP	GO:1903508	positive regulation of nucleic acid-templated transcription	7
BP	GO:0006611	protein export from nucleus	1
BP	GO:0009620	response to fungus	1
BP	GO:0042446	hormone biosynthetic process	1
BP	GO:0007017	microtubule-based process	4
BP	GO:0009132	nucleoside diphosphate metabolic process	1
BP	GO:0019439	aromatic compound catabolic process	4
BP	GO:0044270	cellular nitrogen compound catabolic process	3
BP	GO:0005996	monosaccharide metabolic process	2
BP	GO:0000956	nuclear-transcribed mRNA catabolic process	1
BP	GO:0044550	secondary metabolite biosynthetic process	1
BP	GO:0070646	protein modification by small protein removal	1
BP	GO:0071103	DNA conformation change	2
BP	GO:0042546	cell wall biogenesis	3
BP	GO:0019693	ribose phosphate metabolic process	4
BP	GO:0009311	oligosaccharide metabolic process	1
BP	GO:0051254	positive regulation of RNA metabolic process	7
BP	GO:0051783	regulation of nuclear division	1
BP	GO:1905392	plant organ morphogenesis	1
BP	GO:0009791	post-embryonic development	8
BP	GO:0009150	purine ribonucleotide metabolic process	3
BP	GO:0000070	mitotic sister chromatid segregation	1
BP	GO:0016042	lipid catabolic process	2
BP	GO:0046034	ATP metabolic process	2
BP	GO:0015931	nucleobase-containing compound transport	2
BP	GO:0044262	cellular carbohydrate metabolic process	7
BP	GO:0009260	ribonucleotide biosynthetic process	1
BP	GO:1902600	hydrogen ion transmembrane transport	4
BP	GO:0016054	organic acid catabolic process	2
BP	GO:0046395	carboxylic acid catabolic process	2
BP	GO:0006402	mRNA catabolic process	1
BP	GO:0032879	regulation of localization	1
BP	GO:0040029	regulation of gene expression, epigenetic	1
BP	GO:0040007	growth	2
BP	GO:1901361	organic cyclic compound catabolic process	4
BP	GO:0044772	mitotic cell cycle phase transition	1
BP	GO:0006818	hydrogen transport	4
BP	GO:0015992	proton transport	4
BP	GO:0006163	purine nucleotide metabolic process	3
BP	GO:0006403	RNA localization	1
BP	GO:0006400	tRNA modification	1
BP	GO:0044770	cell cycle phase transition	1
BP	GO:0046390	ribose phosphate biosynthetic process	1
BP	GO:0010628	positive regulation of gene expression	7
BP	GO:0007018	microtubule-based movement	1
BP	GO:0043648	dicarboxylic acid metabolic process	1
BP	GO:0044242	cellular lipid catabolic process	1
BP	GO:0051168	nuclear export	1
BP	GO:0009205	purine ribonucleoside triphosphate metabolic process	2
BP	GO:0048316	seed development	2
BP	GO:0010557	positive regulation of macromolecule biosynthetic process	7
BP	GO:0009144	purine nucleoside triphosphate metabolic process	2
BP	GO:0016567	protein ubiquitination	7
BP	GO:0048229	gametophyte development	1
BP	GO:2000241	regulation of reproductive process	1
BP	GO:0006090	pyruvate metabolic process	1
BP	GO:0031328	positive regulation of cellular biosynthetic process	7
BP	GO:0009259	ribonucleotide metabolic process	3
BP	GO:0015672	monovalent inorganic cation transport	5
BP	GO:0045935	positive regulation of nucleobase-containing compound metabolic process	7
BP	GO:0000819	sister chromatid segregation	1
BP	GO:0009199	ribonucleoside triphosphate metabolic process	2
BP	GO:0051345	positive regulation of hydrolase activity	1
BP	GO:0055076	transition metal ion homeostasis	2
BP	GO:0016311	dephosphorylation	6
BP	GO:0048878	chemical homeostasis	6
BP	GO:0009891	positive regulation of biosynthetic process	7
BP	GO:0048285	organelle fission	4
BP	GO:0006366	transcription from RNA polymerase II promoter	6
BP	GO:0043632	modification-dependent macromolecule catabolic process	6
BP	GO:0071554	cell wall organization or biogenesis	7
BP	GO:0009126	purine nucleoside monophosphate metabolic process	2
BP	GO:0009167	purine ribonucleoside monophosphate metabolic process	2
BP	GO:1901137	carbohydrate derivative biosynthetic process	5
BP	GO:0090407	organophosphate biosynthetic process	4
BP	GO:0009793	embryo development ending in seed dormancy	1
BP	GO:0045333	cellular respiration	1
BP	GO:0097435	supramolecular fiber organization	1
BP	GO:0000902	cell morphogenesis	1
BP	GO:0033692	cellular polysaccharide biosynthetic process	2
BP	GO:0000280	nuclear division	3
BP	GO:0006928	movement of cell or subcellular component	1
BP	GO:0071555	cell wall organization	4
BP	GO:0032446	protein modification by small protein conjugation	7
BP	GO:0006401	RNA catabolic process	1
BP	GO:0030243	cellulose metabolic process	1
BP	GO:0051173	positive regulation of nitrogen compound metabolic process	7
BP	GO:0009790	embryo development	1
BP	GO:0016458	gene silencing	1
BP	GO:0009108	coenzyme biosynthetic process	1
BP	GO:0016049	cell growth	1
BP	GO:0090305	nucleic acid phosphodiester bond hydrolysis	4
BP	GO:0048608	reproductive structure development	5
BP	GO:0016569	covalent chromatin modification	2
BP	GO:0016570	histone modification	2
BP	GO:0009161	ribonucleoside monophosphate metabolic process	2
BP	GO:0009856	pollination	2
BP	GO:0044706	multi-multicellular organism process	2
BP	GO:0061458	reproductive system development	5
BP	GO:0010393	galacturonan metabolic process	1
BP	GO:0045488	pectin metabolic process	1
BP	GO:0045229	external encapsulating structure organization	4
BP	GO:0000271	polysaccharide biosynthetic process	2
BP	GO:0003006	developmental process involved in reproduction	6
BP	GO:0099402	plant organ development	3
BP	GO:0006511	ubiquitin-dependent protein catabolic process	5
BP	GO:0007346	regulation of mitotic cell cycle	1
BP	GO:0008033	tRNA processing	1
BP	GO:0051273	beta-glucan metabolic process	1
BP	GO:0008037	cell recognition	1
BP	GO:0032989	cellular component morphogenesis	1
BP	GO:0048544	recognition of pollen	1
BP	GO:0051603	proteolysis involved in cellular protein catabolic process	7
BP	GO:0006325	chromatin organization	4
BP	GO:0006826	iron ion transport	1
BP	GO:0044257	cellular protein catabolic process	7
BP	GO:0009698	phenylpropanoid metabolic process	1
BP	GO:0010564	regulation of cell cycle process	1
BP	GO:0051128	regulation of cellular component organization	3
BP	GO:0061024	membrane organization	2
BP	GO:0019941	modification-dependent protein catabolic process	5
BP	GO:0006486	protein glycosylation	1
BP	GO:0009875	pollen-pistil interaction	1
BP	GO:0043413	macromolecule glycosylation	1
BP	GO:0009101	glycoprotein biosynthetic process	1
BP	GO:0098813	nuclear chromosome segregation	1
BP	GO:0009165	nucleotide biosynthetic process	1
BP	GO:0043161	proteasome-mediated ubiquitin-dependent protein catabolic process	2
BP	GO:0044282	small molecule catabolic process	2
BP	GO:1901293	nucleoside phosphate biosynthetic process	1
BP	GO:0034637	cellular carbohydrate biosynthetic process	2
BP	GO:0010498	proteasomal protein catabolic process	2
BP	GO:0007059	chromosome segregation	1
BP	GO:0009123	nucleoside monophosphate metabolic process	2
BP	GO:0010608	posttranscriptional regulation of gene expression	1
BP	GO:0016051	carbohydrate biosynthetic process	3
BP	GO:1903047	mitotic cell cycle process	3
BP	GO:0009100	glycoprotein metabolic process	1
BP	GO:0009908	flower development	1
BP	GO:0008380	RNA splicing	2
BP	GO:0051726	regulation of cell cycle	2
BP	GO:0070085	glycosylation	1
BP	GO:0090567	reproductive shoot system development	1
BP	GO:1901607	alpha-amino acid biosynthetic process	1
BP	GO:0006364	rRNA processing	2
BP	GO:0018205	peptidyl-lysine modification	1
BP	GO:0044802	single-organism membrane organization	1
BP	GO:0016072	rRNA metabolic process	2
BP	GO:0070925	organelle assembly	1
BP	GO:0022402	cell cycle process	5
BP	GO:0000041	transition metal ion transport	1
BP	GO:0010605	negative regulation of macromolecule metabolic process	5
BP	GO:0018193	peptidyl-amino acid modification	4
BP	GO:1901605	alpha-amino acid metabolic process	2
BP	GO:0000398	mRNA splicing, via spliceosome	1
BP	GO:0008652	cellular amino acid biosynthetic process	1
BP	GO:0000278	mitotic cell cycle	3
BP	GO:1902589	single-organism organelle organization	3
BP	GO:0031324	negative regulation of cellular metabolic process	3
BP	GO:0009892	negative regulation of metabolic process	5
BP	GO:0000375	RNA splicing, via transesterification reactions	1
BP	GO:0000377	RNA splicing, via transesterification reactions with bulged adenosine as nucleophile	1
BP	GO:0015074	DNA integration	2
BP	GO:0033043	regulation of organelle organization	1
BP	GO:0006397	mRNA processing	2
BP	GO:0034470	ncRNA processing	3
BP	GO:0006399	tRNA metabolic process	1
BP	GO:0010629	negative regulation of gene expression	2
BP	GO:0016071	mRNA metabolic process	3
BP	GO:0048523	negative regulation of cellular process	4
BP	GO:0032259	methylation	3
BP	GO:0042254	ribosome biogenesis	2
BP	GO:0034660	ncRNA metabolic process	3
BP	GO:0016192	vesicle-mediated transport	2
BP	GO:0006520	cellular amino acid metabolic process	2
BP	GO:0022613	ribonucleoprotein complex biogenesis	2
BP	GO:0009451	RNA modification	1
CC	GO:0009521	photosystem	35
CC	GO:0009522	photosystem I	24
CC	GO:0009523	photosystem II	27
CC	GO:0009579	thylakoid	51
CC	GO:0044436	thylakoid part	46
CC	GO:0034357	photosynthetic membrane	45
CC	GO:0042651	thylakoid membrane	40
CC	GO:0009534	chloroplast thylakoid	38
CC	GO:0031976	plastid thylakoid	38
CC	GO:0009535	chloroplast thylakoid membrane	35
CC	GO:0055035	plastid thylakoid membrane	35
CC	GO:0010287	plastoglobule	18
CC	GO:0098796	membrane protein complex	39
CC	GO:0031984	organelle subcompartment	38
CC	GO:0009941	chloroplast envelope	24
CC	GO:0009526	plastid envelope	24
CC	GO:0009570	chloroplast stroma	24
CC	GO:0009532	plastid stroma	24
CC	GO:0009654	photosystem II oxygen evolving complex	6
CC	GO:1990204	oxidoreductase complex	7
CC	GO:0019898	extrinsic component of membrane	5
CC	GO:0031304	intrinsic component of mitochondrial inner membrane	3
CC	GO:0031305	integral component of mitochondrial inner membrane	3
CC	GO:0098590	plasma membrane region	2
CC	GO:0120025	plasma membrane bounded cell projection	3
CC	GO:0005811	lipid particle	3
CC	GO:0032592	integral component of mitochondrial membrane	3
CC	GO:0042995	cell projection	3
CC	GO:0098573	intrinsic component of mitochondrial membrane	3
CC	GO:0005887	integral component of plasma membrane	8
CC	GO:0030136	clathrin-coated vesicle	2
CC	GO:0005911	cell-cell junction	14
CC	GO:0009506	plasmodesma	14
CC	GO:0030054	cell junction	14
CC	GO:0055044	symplast	14
CC	GO:0034045	pre-autophagosomal structure membrane	1
CC	GO:0000118	histone deacetylase complex	1
CC	GO:0030140	trans-Golgi network transport vesicle	1
CC	GO:0009707	chloroplast outer membrane	2
CC	GO:0009527	plastid outer membrane	2
CC	GO:0044459	plasma membrane part	12
CC	GO:0005876	spindle microtubule	1
CC	GO:0031226	intrinsic component of plasma membrane	10
CC	GO:0008541	proteasome regulatory particle, lid subcomplex	1
CC	GO:0072686	mitotic spindle	1
CC	GO:1902554	serine/threonine protein kinase complex	3
CC	GO:0005881	cytoplasmic microtubule	1
CC	GO:0090406	pollen tube	1
CC	GO:1902911	protein kinase complex	3
CC	GO:0031977	thylakoid lumen	1
CC	GO:0032806	carboxy-terminal domain protein kinase complex	1
CC	GO:0031965	nuclear membrane	1
CC	GO:0005905	clathrin-coated pit	1
CC	GO:0034399	nuclear periphery	1
CC	GO:0098589	membrane region	1
CC	GO:0005777	peroxisome	3
CC	GO:0031300	intrinsic component of organelle membrane	3
CC	GO:0031301	integral component of organelle membrane	3
CC	GO:0042579	microbody	3
CC	GO:0005778	peroxisomal membrane	1
CC	GO:0031903	microbody membrane	1
CC	GO:0000786	nucleosome	2
CC	GO:0000178	exosome (RNase complex)	1
CC	GO:0000407	pre-autophagosomal structure	1
CC	GO:0044438	microbody part	1
CC	GO:0044439	peroxisomal part	1
CC	GO:0000307	cyclin-dependent protein kinase holoenzyme complex	2
CC	GO:1905354	exoribonuclease complex	1
CC	GO:0009505	plant-type cell wall	4
CC	GO:0019867	outer membrane	2
CC	GO:0031968	organelle outer membrane	2
CC	GO:0044815	DNA packaging complex	2
CC	GO:0005686	U2 snRNP	1
CC	GO:0005618	cell wall	10
CC	GO:0030312	external encapsulating structure	10
CC	GO:0008023	transcription elongation factor complex	1
CC	GO:0005798	Golgi-associated vesicle	1
CC	GO:0031969	chloroplast membrane	2
CC	GO:0000159	protein phosphatase type 2A complex	1
CC	GO:0042170	plastid membrane	2
CC	GO:0005770	late endosome	1
CC	GO:0008287	protein serine/threonine phosphatase complex	1
CC	GO:1903293	phosphatase complex	1
CC	GO:0005838	proteasome regulatory particle	1
CC	GO:0022624	proteasome accessory complex	1
CC	GO:0016607	nuclear speck	1
CC	GO:0030135	coated vesicle	2
CC	GO:0000932	P-body	1
CC	GO:0048046	apoplast	5
CC	GO:0005819	spindle	1
CC	GO:0031201	SNARE complex	1
CC	GO:0019005	SCF ubiquitin ligase complex	1
CC	GO:0044455	mitochondrial membrane part	3
CC	GO:0098800	inner mitochondrial membrane protein complex	2
CC	GO:0016604	nuclear body	1
CC	GO:0005871	kinesin complex	1
CC	GO:0046658	anchored component of plasma membrane	2
CC	GO:0032993	protein-DNA complex	2
CC	GO:0035770	ribonucleoprotein granule	1
CC	GO:0036464	cytoplasmic ribonucleoprotein granule	1
CC	GO:0031225	anchored component of membrane	2
CC	GO:0030133	transport vesicle	1
CC	GO:0030532	small nuclear ribonucleoprotein complex	1
CC	GO:0097525	spliceosomal snRNP complex	1
CC	GO:0000502	proteasome complex	1
CC	GO:1905369	endopeptidase complex	1
CC	GO:0098798	mitochondrial protein complex	2
CC	GO:0005743	mitochondrial inner membrane	3
CC	GO:0005615	extracellular space	1
CC	GO:0090575	RNA polymerase II transcription factor complex	1
CC	GO:0005789	endoplasmic reticulum membrane	5
CC	GO:0042175	nuclear outer membrane-endoplasmic reticulum membrane network	5
CC	GO:0000785	chromatin	3
CC	GO:0000151	ubiquitin ligase complex	2
CC	GO:0005875	microtubule associated complex	1
CC	GO:0044421	extracellular region part	1
CC	GO:0044798	nuclear transcription factor complex	1
CC	GO:1905368	peptidase complex	1
CC	GO:0044432	endoplasmic reticulum part	5
CC	GO:0019866	organelle inner membrane	3
CC	GO:0031966	mitochondrial membrane	3
CC	GO:0000790	nuclear chromatin	1
CC	GO:0061695	transferase complex, transferring phosphorus-containing groups	3
CC	GO:0031461	cullin-RING ubiquitin ligase complex	1
CC	GO:0005740	mitochondrial envelope	3
CC	GO:0005635	nuclear envelope	1
CC	GO:0005667	transcription factor complex	1
CC	GO:0005773	vacuole	7
CC	GO:0098805	whole membrane	7
CC	GO:0022625	cytosolic large ribosomal subunit	1
CC	GO:0005874	microtubule	1
CC	GO:0099080	supramolecular complex	1
CC	GO:0099081	supramolecular polymer	1
CC	GO:0099512	supramolecular fiber	1
CC	GO:0099513	polymeric cytoskeletal fiber	1
CC	GO:0044429	mitochondrial part	3
CC	GO:0015934	large ribosomal subunit	1
CC	GO:0044451	nucleoplasm part	3
CC	GO:0044454	nuclear chromosome part	1
CC	GO:0005774	vacuolar membrane	2
CC	GO:0044437	vacuolar part	2
CC	GO:0015630	microtubule cytoskeleton	1
CC	GO:0044427	chromosomal part	3
CC	GO:0000228	nuclear chromosome	1
CC	GO:0005768	endosome	1
CC	GO:0005654	nucleoplasm	3
CC	GO:0005840	ribosome	3
CC	GO:0022626	cytosolic ribosome	1
CC	GO:0031410	cytoplasmic vesicle	2
CC	GO:0097708	intracellular vesicle	2
CC	GO:0005730	nucleolus	1
CC	GO:0005694	chromosome	3
CC	GO:0044430	cytoskeletal part	1
CC	GO:0031982	vesicle	2
CC	GO:0044391	ribosomal subunit	1
CC	GO:0044445	cytosolic part	1
CC	GO:0005856	cytoskeleton	1
CC	GO:0044431	Golgi apparatus part	1
MF	GO:0016168	chlorophyll binding	16
MF	GO:0043621	protein self-association	13
MF	GO:0019904	protein domain specific binding	6
MF	GO:0051082	unfolded protein binding	15
MF	GO:0016628	oxidoreductase activity, acting on the CH-CH group of donors, NAD or NADP as acceptor	4
MF	GO:0005516	calmodulin binding	6
MF	GO:0000978	RNA polymerase II core promoter proximal region sequence-specific DNA binding	3
MF	GO:0016627	oxidoreductase activity, acting on the CH-CH group of donors	5
MF	GO:0035091	phosphatidylinositol binding	4
MF	GO:0005388	calcium-transporting ATPase activity	3
MF	GO:0000987	core promoter proximal region sequence-specific DNA binding	3
MF	GO:0001159	core promoter proximal region DNA binding	3
MF	GO:0004869	cysteine-type endopeptidase inhibitor activity	2
MF	GO:0045156	electron transporter, transferring electrons within the cyclic electron transport pathway of photosynthesis activity	2
MF	GO:0008519	ammonium transmembrane transporter activity	2
MF	GO:0005543	phospholipid binding	6
MF	GO:0016762	xyloglucan:xyloglucosyl transferase activity	3
MF	GO:0001871	pattern binding	6
MF	GO:0030247	polysaccharide binding	6
MF	GO:0005509	calcium ion binding	11
MF	GO:0008289	lipid binding	10
MF	GO:0031625	ubiquitin protein ligase binding	4
MF	GO:0000250	lanosterol synthase activity	2
MF	GO:0003680	AT DNA binding	2
MF	GO:0005372	water transmembrane transporter activity	2
MF	GO:0015250	water channel activity	2
MF	GO:0044389	ubiquitin-like protein ligase binding	4
MF	GO:0015085	calcium ion transmembrane transporter activity	3
MF	GO:0016717	oxidoreductase activity, acting on paired donors, with oxidation of a pair of donors resulting in the reduction of molecular oxygen to two molecules of water	2
MF	GO:0015562	efflux transmembrane transporter activity	2
MF	GO:0016881	acid-amino acid ligase activity	2
MF	GO:0008422	beta-glucosidase activity	3
MF	GO:0015333	peptide:proton symporter activity	3
MF	GO:0022897	proton-dependent peptide secondary active transmembrane transporter activity	3
MF	GO:0005102	receptor binding	2
MF	GO:0015291	secondary active transmembrane transporter activity	12
MF	GO:0048038	quinone binding	2
MF	GO:0004497	monooxygenase activity	14
MF	GO:0004866	endopeptidase inhibitor activity	2
MF	GO:0030414	peptidase inhibitor activity	2
MF	GO:0061135	endopeptidase regulator activity	2
MF	GO:0005548	phospholipid transporter activity	2
MF	GO:0061134	peptidase regulator activity	2
MF	GO:0004252	serine-type endopeptidase activity	6
MF	GO:0015662	ATPase activity, coupled to transmembrane movement of ions, phosphorylative mechanism	3
MF	GO:0030246	carbohydrate binding	9
MF	GO:0001671	ATPase activator activity	1
MF	GO:0003989	acetyl-CoA carboxylase activity	1
MF	GO:0004029	aldehyde dehydrogenase (NAD) activity	1
MF	GO:0004315	3-oxoacyl-[acyl-carrier-protein] synthase activity	1
MF	GO:0008131	primary amine oxidase activity	1
MF	GO:0016832	aldehyde-lyase activity	1
MF	GO:0015198	oligopeptide transporter activity	3
MF	GO:0015926	glucosidase activity	3
MF	GO:0035673	oligopeptide transmembrane transporter activity	3
MF	GO:0140096	catalytic activity, acting on a protein	2
MF	GO:0031559	oxidosqualene cyclase activity	2
MF	GO:0042300	beta-amyrin synthase activity	2
MF	GO:0000170	sphingosine hydroxylase activity	1
MF	GO:0004525	ribonuclease III activity	1
MF	GO:0016421	CoA carboxylase activity	1
MF	GO:0016885	ligase activity, forming carbon-carbon bonds	1
MF	GO:0019209	kinase activator activity	1
MF	GO:0019211	phosphatase activator activity	1
MF	GO:0030295	protein kinase activator activity	1
MF	GO:0032296	double-stranded RNA-specific ribonuclease activity	1
MF	GO:0047429	nucleoside-triphosphate diphosphatase activity	1
MF	GO:0070567	cytidylyltransferase activity	1
MF	GO:0072542	protein phosphatase activator activity	1
MF	GO:0016830	carbon-carbon lyase activity	4
MF	GO:0015238	drug transmembrane transporter activity	3
MF	GO:0051539	4 iron, 4 sulfur cluster binding	3
MF	GO:0090484	drug transporter activity	3
MF	GO:0008081	phosphoric diester hydrolase activity	2
MF	GO:0030060	L-malate dehydrogenase activity	1
MF	GO:0051879	Hsp90 protein binding	1
MF	GO:0042910	xenobiotic transporter activity	3
MF	GO:0046983	protein dimerization activity	14
MF	GO:0008236	serine-type peptidase activity	8
MF	GO:0017171	serine hydrolase activity	8
MF	GO:0016709	oxidoreductase activity, acting on paired donors, with incorporation or reduction of molecular oxygen, NAD(P)H as one donor, and incorporation of one atom of oxygen	9
MF	GO:0004089	carbonate dehydratase activity	1
MF	GO:0005545	1-phosphatidylinositol binding	1
MF	GO:0005546	phosphatidylinositol-4,5-bisphosphate binding	1
MF	GO:0010329	auxin efflux transmembrane transporter activity	1
MF	GO:0080161	auxin transmembrane transporter activity	1
MF	GO:0015295	solute:proton symporter activity	4
MF	GO:0004568	chitinase activity	2
MF	GO:0031072	heat shock protein binding	2
MF	GO:0016868	intramolecular transferase activity, phosphotransferases	1
MF	GO:0010181	FMN binding	2
MF	GO:0004407	histone deacetylase activity	1
MF	GO:0019239	deaminase activity	1
MF	GO:0032050	clathrin heavy chain binding	1
MF	GO:0080030	methyl indole-3-acetate esterase activity	1
MF	GO:0080031	methyl salicylate esterase activity	1
MF	GO:0080032	methyl jasmonate esterase activity	1
MF	GO:0008047	enzyme activator activity	4
MF	GO:0051536	iron-sulfur cluster binding	4
MF	GO:0051540	metal cluster binding	4
MF	GO:0016538	cyclin-dependent protein serine/threonine kinase regulator activity	2
MF	GO:0051213	dioxygenase activity	7
MF	GO:0003854	3-beta-hydroxy-delta5-steroid dehydrogenase activity	1
MF	GO:0004427	inorganic diphosphatase activity	1
MF	GO:0016641	oxidoreductase activity, acting on the CH-NH2 group of donors, oxygen as acceptor	1
MF	GO:0033558	protein deacetylase activity	1
MF	GO:0033764	steroid dehydrogenase activity, acting on the CH-OH group of donors, NAD or NADP as acceptor	1
MF	GO:0060590	ATPase regulator activity	1
MF	GO:0016655	oxidoreductase activity, acting on NAD(P)H, quinone or similar compound as acceptor	2
MF	GO:0015294	solute:cation symporter activity	4
MF	GO:0008375	acetylglucosaminyltransferase activity	2
MF	GO:1990837	sequence-specific double-stranded DNA binding	6
MF	GO:0004143	diacylglycerol kinase activity	1
MF	GO:0008271	secondary active sulfate transmembrane transporter activity	1
MF	GO:0016837	carbon-oxygen lyase activity, acting on polysaccharides	1
MF	GO:0030570	pectate lyase activity	1
MF	GO:0015293	symporter activity	4
MF	GO:0019829	cation-transporting ATPase activity	4
MF	GO:0042625	ATPase coupled ion transmembrane transporter activity	4
MF	GO:0003951	NAD+ kinase activity	1
MF	GO:0008810	cellulase activity	1
MF	GO:0016742	hydroxymethyl-, formyl- and related transferase activity	1
MF	GO:0045548	phenylalanine ammonia-lyase activity	1
MF	GO:0005319	lipid transporter activity	2
MF	GO:0016229	steroid dehydrogenase activity	1
MF	GO:0019213	deacetylase activity	1
MF	GO:0061608	nuclear import signal receptor activity	1
MF	GO:1902936	phosphatidylinositol bisphosphate binding	1
MF	GO:0000977	RNA polymerase II regulatory region sequence-specific DNA binding	4
MF	GO:0022853	active ion transmembrane transporter activity	4
MF	GO:0004743	pyruvate kinase activity	1
MF	GO:0008574	ATP-dependent microtubule motor activity, plus-end-directed	1
MF	GO:0030955	potassium ion binding	1
MF	GO:0031420	alkali metal ion binding	1
MF	GO:1990939	ATP-dependent microtubule motor activity	1
MF	GO:0016866	intramolecular transferase activity	3
MF	GO:0001012	RNA polymerase II regulatory region DNA binding	4
MF	GO:0005315	inorganic phosphate transmembrane transporter activity	1
MF	GO:0009044	xylan 1,4-beta-xylosidase activity	1
MF	GO:0016780	phosphotransferase activity, for other substituted phosphate groups	1
MF	GO:0097599	xylanase activity	1
MF	GO:1901981	phosphatidylinositol phosphate binding	1
MF	GO:0015116	sulfate transmembrane transporter activity	1
MF	GO:0016841	ammonia-lyase activity	1
MF	GO:0046556	alpha-L-arabinofuranosidase activity	1
MF	GO:0046912	transferase activity, transferring acyl groups, acyl groups converted into alkyl on transfer	1
MF	GO:0004364	glutathione transferase activity	3
MF	GO:0016620	oxidoreductase activity, acting on the aldehyde or oxo group of donors, NAD or NADP as acceptor	2
MF	GO:0005506	iron ion binding	13
MF	GO:0008374	O-acyltransferase activity	3
MF	GO:0008194	UDP-glycosyltransferase activity	12
MF	GO:0004032	alditol:NADP+ 1-oxidoreductase activity	1
MF	GO:0004033	aldo-keto reductase (NADP) activity	1
MF	GO:0008106	alcohol dehydrogenase (NADP+) activity	1
MF	GO:0044183	protein binding involved in protein folding	1
MF	GO:0046933	proton-transporting ATP synthase activity, rotational mechanism	1
MF	GO:1904680	peptide transmembrane transporter activity	3
MF	GO:0004185	serine-type carboxypeptidase activity	2
MF	GO:0019887	protein kinase regulator activity	2
MF	GO:0004659	prenyltransferase activity	1
MF	GO:0008536	Ran GTPase binding	1
MF	GO:0016744	transferase activity, transferring aldehyde or ketonic groups	1
MF	GO:0019706	protein-cysteine S-palmitoyltransferase activity	1
MF	GO:0019707	protein-cysteine S-acyltransferase activity	1
MF	GO:0000287	magnesium ion binding	6
MF	GO:0004601	peroxidase activity	4
MF	GO:0016684	oxidoreductase activity, acting on peroxide as acceptor	4
MF	GO:0042887	amide transmembrane transporter activity	3
MF	GO:0072509	divalent inorganic cation transmembrane transporter activity	3
MF	GO:0004312	fatty acid synthase activity	1
MF	GO:0016814	hydrolase activity, acting on carbon-nitrogen (but not peptide) bonds, in cyclic amidines	1
MF	GO:0016877	ligase activity, forming carbon-sulfur bonds	1
MF	GO:0016879	ligase activity, forming carbon-nitrogen bonds	2
MF	GO:0008139	nuclear localization sequence binding	1
MF	GO:0016409	palmitoyltransferase activity	1
MF	GO:0070566	adenylyltransferase activity	1
MF	GO:0000976	transcription regulatory region sequence-specific DNA binding	4
MF	GO:0019207	kinase regulator activity	2
MF	GO:0070008	serine-type exopeptidase activity	2
MF	GO:0030234	enzyme regulator activity	10
MF	GO:0016615	malate dehydrogenase activity	1
MF	GO:0004724	magnesium-dependent protein serine/threonine phosphatase activity	2
MF	GO:0016638	oxidoreductase activity, acting on the CH-NH2 group of donors	1
MF	GO:0015297	antiporter activity	5
MF	GO:0009931	calcium-dependent protein serine/threonine kinase activity	1
MF	GO:0010857	calcium-dependent protein kinase activity	1
MF	GO:0015165	pyrimidine nucleotide-sugar transmembrane transporter activity	1
MF	GO:0051787	misfolded protein binding	1
MF	GO:0009055	electron carrier activity	4
MF	GO:0004553	hydrolase activity, hydrolyzing O-glycosyl compounds	12
MF	GO:0000149	SNARE binding	2
MF	GO:0004180	carboxypeptidase activity	2
MF	GO:0015035	protein disulfide oxidoreductase activity	2
MF	GO:0016831	carboxy-lyase activity	2
MF	GO:0015103	inorganic anion transmembrane transporter activity	2
MF	GO:0016903	oxidoreductase activity, acting on the aldehyde or oxo group of donors	2
MF	GO:0000175	3'-5'-exoribonuclease activity	1
MF	GO:0004683	calmodulin-dependent protein kinase activity	1
MF	GO:0008061	chitin binding	1
MF	GO:0016417	S-acyltransferase activity	1
MF	GO:0061630	ubiquitin protein ligase activity	4
MF	GO:0061659	ubiquitin-like protein ligase activity	4
MF	GO:0000975	regulatory region DNA binding	8
MF	GO:0001067	regulatory region nucleic acid binding	8
MF	GO:0044212	transcription regulatory region DNA binding	8
MF	GO:0050661	NADP binding	2
MF	GO:1901682	sulfur compound transmembrane transporter activity	1
MF	GO:0016747	transferase activity, transferring acyl groups other than amino-acyl groups	11
MF	GO:0015036	disulfide oxidoreductase activity	2
MF	GO:0019888	protein phosphatase regulator activity	2
MF	GO:0019901	protein kinase binding	2
MF	GO:0004970	ionotropic glutamate receptor activity	1
MF	GO:0005230	extracellular ligand-gated ion channel activity	1
MF	GO:0008066	glutamate receptor activity	1
MF	GO:0022824	transmitter-gated ion channel activity	1
MF	GO:0022835	transmitter-gated channel activity	1
MF	GO:0030594	neurotransmitter receptor activity	1
MF	GO:0016765	transferase activity, transferring alkyl or aryl (other than methyl) groups	4
MF	GO:0019208	phosphatase regulator activity	2
MF	GO:0004532	exoribonuclease activity	1
MF	GO:0010427	abscisic acid binding	1
MF	GO:0016896	exoribonuclease activity, producing 5'-phosphomonoesters	1
MF	GO:0008080	N-acetyltransferase activity	2
MF	GO:0005338	nucleotide-sugar transmembrane transporter activity	1
MF	GO:0015301	anion:anion antiporter activity	1
MF	GO:0015197	peptide transporter activity	4
MF	GO:0008144	drug binding	1
MF	GO:0030276	clathrin binding	1
MF	GO:0016836	hydro-lyase activity	2
MF	GO:0019900	kinase binding	2
MF	GO:0016706	oxidoreductase activity, acting on paired donors, with incorporation or reduction of molecular oxygen, 2-oxoglutarate as one donor, and incorporation of one atom each of oxygen into both donors	1
MF	GO:0019840	isoprenoid binding	1
MF	GO:0051087	chaperone binding	1
MF	GO:0098772	molecular function regulator	10
MF	GO:0016820	hydrolase activity, acting on acid anhydrides, catalyzing transmembrane movement of substances	7
MF	GO:0042626	ATPase activity, coupled to transmembrane movement of substances	7
MF	GO:0016209	antioxidant activity	4
MF	GO:0004402	histone acetyltransferase activity	1
MF	GO:0015276	ligand-gated ion channel activity	1
MF	GO:0016799	hydrolase activity, hydrolyzing N-glycosyl compounds	1
MF	GO:0022834	ligand-gated channel activity	1
MF	GO:0042562	hormone binding	1
MF	GO:0061733	peptide-lysine-N-acetyltransferase activity	1
MF	GO:0016810	hydrolase activity, acting on carbon-nitrogen (but not peptide) bonds	3
MF	GO:0015171	amino acid transmembrane transporter activity	2
MF	GO:0016616	oxidoreductase activity, acting on the CH-OH group of donors, NAD or NADP as acceptor	6
MF	GO:0003993	acid phosphatase activity	1
MF	GO:0003690	double-stranded DNA binding	7
MF	GO:0004864	protein phosphatase inhibitor activity	1
MF	GO:0016410	N-acyltransferase activity	2
MF	GO:0030145	manganese ion binding	2
MF	GO:0005487	nucleocytoplasmic transporter activity	1
MF	GO:0016763	transferase activity, transferring pentosyl groups	1
MF	GO:0019212	phosphatase inhibitor activity	1
MF	GO:0043492	ATPase activity, coupled to movement of substances	7
MF	GO:0045735	nutrient reservoir activity	2
MF	GO:0008483	transaminase activity	1
MF	GO:0016769	transferase activity, transferring nitrogenous groups	1
MF	GO:0034212	peptide N-acetyltransferase activity	1
MF	GO:0001228	transcriptional activator activity, RNA polymerase II transcription regulatory region sequence-specific binding	1
MF	GO:0005484	SNAP receptor activity	1
MF	GO:0016829	lyase activity	10
MF	GO:0015399	primary active transmembrane transporter activity	7
MF	GO:0015405	P-P-bond-hydrolysis-driven transmembrane transporter activity	7
MF	GO:0016413	O-acetyltransferase activity	1
MF	GO:0016860	intramolecular oxidoreductase activity	1
MF	GO:0016614	oxidoreductase activity, acting on CH-OH group of donors	6
MF	GO:0033218	amide binding	2
MF	GO:0046982	protein heterodimerization activity	2
MF	GO:0004857	enzyme inhibitor activity	3
MF	GO:0022838	substrate-specific channel activity	3
MF	GO:0004843	thiol-dependent ubiquitin-specific protease activity	1
MF	GO:0016667	oxidoreductase activity, acting on a sulfur group of donors	2
MF	GO:0016407	acetyltransferase activity	3
MF	GO:0005048	signal sequence binding	1
MF	GO:0016702	oxidoreductase activity, acting on single donors with incorporation of molecular oxygen, incorporation of two atoms of oxygen	1
MF	GO:0043178	alcohol binding	1
MF	GO:0004888	transmembrane signaling receptor activity	5
MF	GO:0016651	oxidoreductase activity, acting on NAD(P)H	2
MF	GO:0051015	actin filament binding	1
MF	GO:0099600	transmembrane receptor activity	5
MF	GO:0019899	enzyme binding	7
MF	GO:0016796	exonuclease activity, active with either ribo- or deoxyribonucleic acids and producing 5'-phosphomonoesters	1
MF	GO:0044769	ATPase activity, coupled to transmembrane movement of ions, rotational mechanism	1
MF	GO:0032403	protein complex binding	2
MF	GO:0016835	carbon-oxygen lyase activity	5
MF	GO:0004675	transmembrane receptor protein serine/threonine kinase activity	4
MF	GO:0016874	ligase activity	4
MF	GO:0005351	sugar:proton symporter activity	1
MF	GO:0005402	cation:sugar symporter activity	1
MF	GO:0005507	copper ion binding	3
MF	GO:0019199	transmembrane receptor protein kinase activity	4
MF	GO:0046873	metal ion transmembrane transporter activity	4
MF	GO:0008408	3'-5' exonuclease activity	1
MF	GO:0033293	monocarboxylic acid binding	1
MF	GO:0038023	signaling receptor activity	6
MF	GO:0042803	protein homodimerization activity	1
MF	GO:0099516	ion antiporter activity	1
MF	GO:0004540	ribonuclease activity	3
MF	GO:0004872	receptor activity	6
MF	GO:0005342	organic acid transmembrane transporter activity	2
MF	GO:0046943	carboxylic acid transmembrane transporter activity	2
MF	GO:0016840	carbon-nitrogen lyase activity	1
MF	GO:0015267	channel activity	3
MF	GO:0022803	passive transmembrane transporter activity	3
MF	GO:0060089	molecular transducer activity	6
MF	GO:0010333	terpene synthase activity	2
MF	GO:0071949	FAD binding	1
MF	GO:0004842	ubiquitin-protein transferase activity	7
MF	GO:0016853	isomerase activity	5
MF	GO:0043531	ADP binding	9
MF	GO:0016701	oxidoreductase activity, acting on single donors with incorporation of molecular oxygen	1
MF	GO:0004722	protein serine/threonine phosphatase activity	2
MF	GO:0015079	potassium ion transmembrane transporter activity	1
MF	GO:0016838	carbon-oxygen lyase activity, acting on phosphates	2
MF	GO:0030170	pyridoxal phosphate binding	2
MF	GO:0070279	vitamin B6 binding	2
MF	GO:0008238	exopeptidase activity	2
MF	GO:0003755	peptidyl-prolyl cis-trans isomerase activity	1
MF	GO:0004620	phospholipase activity	1
MF	GO:0004521	endoribonuclease activity	2
[truncated: 88 more rows]

## Sheet: Table S6
Supplementary Table S6. List of genes differentially expressed (no activated) in resistant grapevine in response to P.viticola BS-4-MW
[truncated: 323 more rows]
